# Supplementary material for: 2-Chloroethanol Induces Hepatic Toxicity by Disrupting Endoplasmic Reticulum Homeostasis Ameliorated by Dimethyl Sulfoxide
Source: Research Square preprint supplement (doi:10.21203/rs.3.rs-5876858/v1), 2025-01-28
Supplement: Supplementary file 1 [file 92bdd912bf458a6c50a0d9bf.docx]

**Figure S2**

**
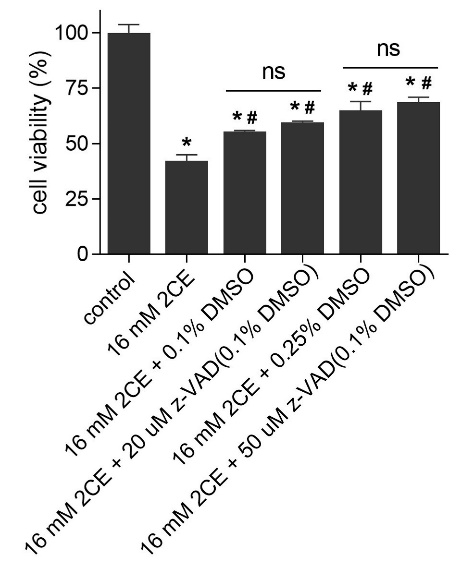
**

Inhibiting apoptosis does not ameliorate 2CE-induced cell death. Following pre-treatment with the pan-caspase inhibitor Z-VAD-FMK (20 or 50 μM) or vehicle control (0.1 or 0.25% DMSO) for 1 hour, cells treated with 16 mM 2CE were counted 24 hours later, with untreated cells serving as the 100% baseline. **P* < 0.05 compared to the control group, #*P* < 0.05 compared to 2CE; mean ± SEM, n = 3.
