# Supplementary material for: 2-Chloroethanol Induces Hepatic Toxicity by Disrupting Endoplasmic Reticulum Homeostasis Ameliorated by Dimethyl Sulfoxide
Source: Research Square preprint supplement (doi:10.21203/rs.3.rs-5876858/v1), 2025-01-28
Supplement: Supplementary file 2 [file ae31493e417b5bc5a90f169f.xlsx]

## Sheet: 工作表1
Table S1. Primers sequences for the targeted genes.
RT-qPCR primers
Gene		Sequences
Map1lc3b	sense	5'-GAACAAAGAGTGGAAGATG-3'
	antisense	5'-GATCAGGTACAAGGAACT-3'
Hspa5	sense	5'-CCACCGTAACAATCAAGG-3'
	antisense	5'-AATACCATTCACATCTATCTCAA-3'
Eif2ak3	sense	5'-ACACAGCCAATGAGGAAGT-3'
	antisense	5'-GAGACCCTGACGGATGATT-3'
Eif2s1	sense	5'-CAATCAGGCTATGGCAGTCAT-3'
	antisense	5'-GCAAGTTCAGTCTCATCTGTATCT-3'
Atf4	sense	5'-GGTTGGTCAGTGCCTCAGA-3'
	antisense	5'-GAAGTCAAACTCTTTCAGGTCCAT-3'
Ppp1r15a	sense	5'-GCAGAAGCGGCTCAGATC-3'
	antisense	5'-AGCAAGGAAATGGACTGTAACT-3'
Ddit3	sense	5'-CTTCATACACCACCACACC-3'
	antisense	5'-TCCTCATACCAGGCTTCC-3'
Atf6	sense	5'-TGTATTACGCTTCGCCTGGAA-3'
	antisense	5'-CATCTTCGGTCTTGTGGTCTTGTT-3'
Ern1	sense	5'-ACAGAATACACCATCACCAT-3'
	antisense	5'-CAGTTACCACCAGTCCAT-3'
18S	sense	5'-GGAGAGGGAGCCTGAGAAAC-3'
	antisense	5'-CCTCCAATGGATCCTCGTTA-3'
RT-PCR primers
Gene		Sequences
Xbp1	sense	5'-CTCAGAGGCAGAGTCCAAGG-3'
	antisense	5'-GGAAGATGTTCTGGGGAGGT-3'
α-tubulin	sense	5'-ATCACAGGCAAGGAAGATGC-3'
	antisense	5'-TGGAATTGTAGGGCTCAACC-3'
