# Supplementary material for: 2-Chloroethanol Induces Hepatic Toxicity by Disrupting Endoplasmic Reticulum Homeostasis Ameliorated by Dimethyl Sulfoxide
Source: Research Square preprint supplement (doi:10.21203/rs.3.rs-5876858/v1), 2025-01-28
Supplement: Supplementary file 3 [file b51b71195a44486ee12d41aa.xlsx]

## Sheet: DEG_Filtered_Up
Table S3. DEG filtered genes-upregulated
Index	ensembl_gene_id	symbol	entrezgene	description	baseMean	log2FoldChange	lfcSE	stat	pvalue	padj	2CE-1	2CE-2	2CE-3	C-1	C-2	C-3	ICRL_2CE.norm.count.mean	ICRL_C.norm.count.mean
6	ENSMUSG00000000078	Klf6	23849	Kruppel-like factor 6 [Source:MGI Symbol;Acc:MGI:1346318]	5221.62	5.83076	0.452101	12.897	4.67904e-38	3.06171e-35	16948.3	3729.82	10110.7	176.069	152.225	212.628	10262.9	180.308
13	ENSMUSG00000000131	Xpo6	74204	exportin 6 [Source:MGI Symbol;Acc:MGI:2429950]	696.382	1.26265	0.342142	3.69041	0.000223892	0.00179758	1445.78	555.048	948.479	407.407	406.193	415.384	983.102	409.661
26	ENSMUSG00000000204	Slfn4	20558	schlafen 4 [Source:MGI Symbol;Acc:MGI:1329010]	12.648	4.21481	1.01973	4.13326	3.5765e-05	0.000395882	42.8283	22.7282	6.45224	0.789549	2.32998	0.759385	24.0029	1.29297
36	ENSMUSG00000000296	Tpd52l1	21987	tumor protein D52-like 1 [Source:MGI Symbol;Acc:MGI:1298386]	83.094	1.21208	0.290957	4.16583	3.1022e-05	0.000349522	112.911	125.603	109.688	46.5834	56.6962	47.0819	116.067	50.1205
38	ENSMUSG00000000303	Cdh1	12550	cadherin 1 [Source:MGI Symbol;Acc:MGI:88354]	612.368	1.42476	0.464225	3.06911	0.002147	0.0115738	1637.86	666.296	372.939	390.827	286.587	319.701	892.365	332.372
53	ENSMUSG00000000385	Tmprss2	50528	transmembrane protease, serine 2 [Source:MGI Symbol;Acc:MGI:1354381]	310.801	1.45155	0.238394	6.08885	1.13722e-09	4.38719e-08	533.407	444.995	387.134	180.807	149.119	169.343	455.179	166.423
62	ENSMUSG00000000531	Grasp	56149	GRP1 (general receptor for phosphoinositides 1)-associated scaffold protein [Source:MGI Symbol;Acc:MGI:1860303]	40.3739	2.64544	0.470239	5.62573	1.84729e-08	5.46573e-07	46.7218	71.7734	90.3313	15.0014	8.54326	9.87201	69.6088	11.1389
69	ENSMUSG00000000567	Sox9	20682	SRY (sex determining region Y)-box 9 [Source:MGI Symbol;Acc:MGI:98371]	927.916	6.17733	1.08736	5.68102	1.33896e-08	4.09599e-07	4472.32	247.618	771.687	23.6865	24.8531	27.3379	1830.54	25.2925
92	ENSMUSG00000000776	Polr3d	67065	polymerase (RNA) III (DNA directed) polypeptide D [Source:MGI Symbol;Acc:MGI:1914315]	147.325	1.30438	0.39207	3.32691	0.000878136	0.0055975	237.503	104.071	287.77	77.3758	81.5493	95.6825	209.781	84.8692
93	ENSMUSG00000000782	Tcf7	21414	transcription factor 7, T cell specific [Source:MGI Symbol;Acc:MGI:98507]	59.6269	1.51276	0.354389	4.26866	1.9665e-05	0.000237783	79.1675	99.2865	86.46	22.8969	38.0563	31.8942	88.3047	30.9491
94	ENSMUSG00000000787	Ddx3x	13205	DEAD/H (Asp-Glu-Ala-Asp/His) box polypeptide 3, X-linked [Source:MGI Symbol;Acc:MGI:103064]	7194.56	1.16807	0.300609	3.88568	0.000102043	0.000946599	13401.4	6560.09	9911.93	5020.74	4664.62	3608.6	9957.8	4431.32
106	ENSMUSG00000000915	Hip1r	29816	huntingtin interacting protein 1 related [Source:MGI Symbol;Acc:MGI:1352504]	670.868	1.68718	0.29414	5.73599	9.69449e-09	3.0771e-07	1395.17	686.632	989.773	300.818	330.08	322.739	1023.86	317.879
124	ENSMUSG00000001056	Nhp2	52530	NHP2 ribonucleoprotein [Source:MGI Symbol;Acc:MGI:1098547]	315.484	1.27531	0.276254	4.61643	3.90407e-06	5.88307e-05	459.431	326.569	553.602	210.02	172.418	170.862	446.534	184.433
131	ENSMUSG00000001098	Kctd10	330171	potassium channel tetramerisation domain containing 10 [Source:MGI Symbol;Acc:MGI:2141207]	118.897	1.08839	0.367329	2.96299	0.00304663	0.0152672	227.12	96.8941	161.306	75.0072	86.9859	66.0665	161.773	76.0199
135	ENSMUSG00000001119	Col6a1	12833	collagen, type VI, alpha 1 [Source:MGI Symbol;Acc:MGI:88459]	99.2686	1.00569	0.31524	3.19025	0.00142152	0.00830423	147.952	105.268	144.53	55.2684	60.5795	82.0136	132.583	65.9538
147	ENSMUSG00000001156	Mxd1	17119	MAX dimerization protein 1 [Source:MGI Symbol;Acc:MGI:96908]	116.411	1.18023	0.388571	3.03737	0.00238656	0.0125624	255.672	123.211	105.817	66.3221	73.7827	73.6604	161.567	71.2551
167	ENSMUSG00000001305	Rrp15	67223	ribosomal RNA processing 15 homolog (S. cerevisiae) [Source:MGI Symbol;Acc:MGI:1914473]	200.707	1.126	0.345472	3.25929	0.00111691	0.00684509	327.053	153.117	345.84	123.959	131.255	123.02	275.336	126.078
179	ENSMUSG00000001419	Mef2d	17261	myocyte enhancer factor 2D [Source:MGI Symbol;Acc:MGI:99533]	682.3	1.96689	0.397251	4.95126	7.37357e-07	1.39381e-05	1400.36	490.452	1369.16	347.402	223.678	262.747	1086.66	277.942
189	ENSMUSG00000001473	Tubb6	67951	tubulin, beta 6 class V [Source:MGI Symbol;Acc:MGI:1915201]	409.868	3.58089	0.502583	7.12497	1.04104e-12	6.7859e-11	1026.58	226.086	1016.87	70.2699	76.1127	43.285	756.514	63.2225
199	ENSMUSG00000001542	Ell2	192657	elongation factor RNA polymerase II 2 [Source:MGI Symbol;Acc:MGI:2183438]	2473.43	1.05437	0.32065	3.28822	0.00100824	0.0062786	4712.41	2081.43	3223.54	1880.71	1361.48	1581.04	3339.13	1607.74
206	ENSMUSG00000001627	Ifrd1	15982	interferon-related developmental regulator 1 [Source:MGI Symbol;Acc:MGI:1316717]	6757.16	5.32612	0.415779	12.81	1.44184e-37	9.08516e-35	18876.9	5087.54	15592.5	364.772	312.217	309.07	13185.6	328.686
207	ENSMUSG00000001630	Stk38l	232533	serine/threonine kinase 38 like [Source:MGI Symbol;Acc:MGI:1922250]	401.042	1.14052	0.441664	2.58234	0.00981335	0.0385487	922.756	232.067	500.694	211.599	306.004	233.131	551.839	250.245
212	ENSMUSG00000001666	Ddt	13202	D-dopachrome tautomerase [Source:MGI Symbol;Acc:MGI:1298381]	472.131	1.01386	0.264573	3.83207	0.00012707	0.00113961	589.214	547.87	757.493	393.985	261.734	282.491	631.526	312.737
213	ENSMUSG00000001670	Tat	234724	tyrosine aminotransferase [Source:MGI Symbol;Acc:MGI:98487]	70193.4	1.93849	0.266947	7.26171	3.8224e-13	2.72094e-11	121757	106572	105690	39774.3	23324.6	24042.9	111340	29047.3
240	ENSMUSG00000001870	Ltbp1	268977	latent transforming growth factor beta binding protein 1 [Source:MGI Symbol;Acc:MGI:109151]	37.599	1.139	0.416154	2.73696	0.00620102	0.0267083	55.8066	49.0452	50.3274	25.2656	15.5332	29.616	51.7264	23.4716
241	ENSMUSG00000001891	Ugp2	216558	UDP-glucose pyrophosphorylase 2 [Source:MGI Symbol;Acc:MGI:2183447]	6221.69	1.67845	0.294183	5.70547	1.16025e-08	3.60865e-07	10434.5	7014.65	10994.6	3922.48	2755.59	2208.29	9481.27	2962.12
247	ENSMUSG00000001930	Vwf	22371	Von Willebrand factor [Source:MGI Symbol;Acc:MGI:98941]	41.183	1.11127	0.386671	2.87394	0.00405381	0.0190412	48.0196	71.7734	49.037	25.2656	27.1831	25.8191	56.2767	26.0893
250	ENSMUSG00000001946	Esam	69524	endothelial cell-specific adhesion molecule [Source:MGI Symbol;Acc:MGI:1916774]	170.102	1.31601	0.295815	4.44877	8.63639e-06	0.000117451	290.713	194.984	242.604	91.5877	79.2193	121.502	242.767	97.4362
269	ENSMUSG00000002052	Supt6	20926	suppressor of Ty 6 [Source:MGI Symbol;Acc:MGI:107726]	1215.23	1.22725	0.298629	4.1096	3.96349e-05	0.000431696	2153.1	1051.48	1904.7	799.813	692.78	689.522	1703.09	727.372
290	ENSMUSG00000002233	Rhoc	11853	ras homolog family member C [Source:MGI Symbol;Acc:MGI:106028]	105.2	1.23901	0.314629	3.93801	8.21593e-05	0.00079015	193.376	118.426	131.626	69.4803	60.5795	57.7133	147.809	62.591
292	ENSMUSG00000002250	Ppard	19015|69050	peroxisome proliferator activator receptor delta [Source:MGI Symbol;Acc:MGI:101884]|peroxisome proliferator activator receptor delta [Source:MGI Symbol;Acc:MGI:101884]	130.302	1.40165	0.365422	3.83571	0.000125201	0.00112522	284.224	142.351	140.659	75.7967	59.8028	78.9761	189.078	71.5252
296	ENSMUSG00000002289	Angptl4	57875	angiopoietin-like 4 [Source:MGI Symbol;Acc:MGI:1888999]	4311.94	2.25997	0.277297	8.14999	3.63947e-16	3.96912e-14	9366.42	4921.26	7115.53	1677.79	1394.88	1395.75	7134.4	1489.47
313	ENSMUSG00000002384	Bmp8b	12164	bone morphogenetic protein 8b [Source:MGI Symbol;Acc:MGI:107335]	8.87744	5.06323	1.57017	3.22463	0.00126134	0.00754011	19.4674	0	32.2612	0	0.77666	0.759385	17.2429	0.512015
324	ENSMUSG00000002477	Snrpd1	20641	small nuclear ribonucleoprotein D1 [Source:MGI Symbol;Acc:MGI:98344]	175.398	1.33259	0.381807	3.49023	0.0004826	0.00342532	312.777	123.211	317.45	95.5354	97.8591	105.555	251.146	99.6497
338	ENSMUSG00000002617	Zfp40	22700	zinc finger protein 40 [Source:MGI Symbol;Acc:MGI:99185]	81.0276	1.44438	0.417472	3.45983	0.000540512	0.00377047	128.485	65.7923	161.306	49.7416	49.7062	31.1348	118.528	43.5275
360	ENSMUSG00000002797	Ggct	110175	gamma-glutamyl cyclotransferase [Source:MGI Symbol;Acc:MGI:95700]	90.6978	1.84263	0.344134	5.35439	8.58447e-08	2.10747e-06	185.589	98.0903	141.949	39.4775	38.833	40.2474	141.876	39.5193
367	ENSMUSG00000002831	Plin4	57435	perilipin 4 [Source:MGI Symbol;Acc:MGI:1929709]	141.479	1.05416	0.401002	2.62881	0.00856848	0.0345685	116.805	289.486	166.468	114.485	97.0825	64.5477	190.919	92.0383
388	ENSMUSG00000002980	Bcam	57278	basal cell adhesion molecule [Source:MGI Symbol;Acc:MGI:1929940]	57.1991	1.19255	0.390433	3.05442	0.00225497	0.0120177	98.6349	71.7734	68.3937	35.5297	23.2998	45.5631	79.6007	34.7975
397	ENSMUSG00000003032	Klf4	16600	Kruppel-like factor 4 (gut) [Source:MGI Symbol;Acc:MGI:1342287]	120.647	3.64818	0.464092	7.86089	3.81421e-15	3.6252e-13	237.503	172.256	260.67	8.68504	32.6197	12.1502	223.476	17.8183
413	ENSMUSG00000003153	Slc2a3	20527	solute carrier family 2 (facilitated glucose transporter), member 3 [Source:MGI Symbol;Acc:MGI:95757]	24.8316	3.19222	0.703895	4.53508	5.7582e-06	8.27401e-05	80.4653	37.0829	16.7758	3.94775	3.8833	6.83447	44.7747	4.8885
455	ENSMUSG00000003452	Bicd1	12121	BICD cargo adaptor 1 [Source:MGI Symbol;Acc:MGI:1101760]	20.2368	1.69664	0.581512	2.91764	0.00352693	0.017079	28.5522	19.1396	45.1657	6.31639	10.0966	12.1502	30.9525	9.52104
459	ENSMUSG00000003500	Impdh1	23917	inosine monophosphate dehydrogenase 1 [Source:MGI Symbol;Acc:MGI:96567]	45.0776	1.29517	0.480834	2.69358	0.00706885	0.0297753	102.528	40.6716	49.037	29.2133	18.6398	30.3754	64.079	26.0762
466	ENSMUSG00000003541	Ier3	15937	immediate early response 3 [Source:MGI Symbol;Acc:MGI:104814]	36.6216	4.38753	0.77099	5.69077	1.26466e-08	3.90484e-07	134.974	33.4943	41.2943	1.5791	1.55332	6.83447	69.9209	3.32229
477	ENSMUSG00000003623	Crot	74114	carnitine O-octanoyltransferase [Source:MGI Symbol;Acc:MGI:1921364]	5639.39	1.22084	0.302911	4.03037	5.56902e-05	0.000573337	7385.94	11208.6	5083.07	3378.48	3229.35	3550.89	7892.54	3386.24
483	ENSMUSG00000003721	Insig2	72999	insulin induced gene 2 [Source:MGI Symbol;Acc:MGI:1920249]	15527.3	3.05665	0.18798	16.2605	1.8816e-59	3.55685e-56	24256.4	31353	27558.8	3402.17	3237.89	3355.72	27722.7	3331.93
486	ENSMUSG00000003752	Itpkc	233011	inositol 1,4,5-trisphosphate 3-kinase C [Source:MGI Symbol;Acc:MGI:2442554]	107.071	2.23827	0.595465	3.75886	0.000170692	0.00143406	345.222	44.2603	140.659	31.582	43.4929	37.2099	176.714	37.4283
487	ENSMUSG00000003762	Coq8b	76889	coenzyme Q8B [Source:MGI Symbol;Acc:MGI:1924139]	139.871	1.18767	0.36673	3.23853	0.00120147	0.00723439	284.224	118.426	180.663	82.1131	97.8591	75.9385	194.438	85.3036
498	ENSMUSG00000003848	Nob1	67619	NIN1/RPN12 binding protein 1 homolog [Source:MGI Symbol;Acc:MGI:1914869]	184.653	1.57131	0.372749	4.21546	2.49265e-05	0.00029146	299.798	144.743	384.553	86.8504	95.5291	96.4419	276.365	92.9405
515	ENSMUSG00000004040	Stat3	20848	signal transducer and activator of transcription 3 [Source:MGI Symbol;Acc:MGI:103038]	3998.18	1.64403	0.29792	5.51835	3.42198e-08	9.35984e-07	8477.41	4353.06	5343.74	1579.1	2146.69	2089.07	6058.07	1938.28
516	ENSMUSG00000004043	Stat5a	20850	signal transducer and activator of transcription 5A [Source:MGI Symbol;Acc:MGI:103036]	129.061	1.20285	0.321549	3.74079	0.000183443	0.00151721	241.396	159.098	139.368	92.3772	73.7827	68.3447	179.954	78.1682
517	ENSMUSG00000004044	Cavin1	19285	caveolae associated 1 [Source:MGI Symbol;Acc:MGI:1277968]	82.5118	1.1898	0.322821	3.68565	0.000228121	0.00182134	116.805	93.3054	134.207	41.0566	49.7062	59.9914	114.772	50.2514
527	ENSMUSG00000004100	Ppan	235036	peter pan homolog [Source:MGI Symbol;Acc:MGI:2178445]	302.518	2.25421	0.518874	4.34443	1.39636e-05	0.000177286	595.703	126.8	778.14	95.5354	112.616	106.314	500.214	104.822
550	ENSMUSG00000004451	Ralb	64143	v-ral simian leukemia viral oncogene B [Source:MGI Symbol;Acc:MGI:1927244]	167.403	1.01054	0.382999	2.6385	0.00832737	0.0338591	317.968	132.781	220.666	98.6936	86.9859	147.321	223.805	111
556	ENSMUSG00000004508	Gab2	14389	growth factor receptor bound protein 2-associated protein 2 [Source:MGI Symbol;Acc:MGI:1333854]	74.8048	1.21967	0.411565	2.96348	0.00304181	0.0152476	128.485	68.1847	117.431	52.1102	27.1831	55.4351	104.7	44.9095
601	ENSMUSG00000004902	Slc25a18	71803	solute carrier family 25 (mitochondrial carrier), member 18 [Source:MGI Symbol;Acc:MGI:1919053]	18.0298	1.868	0.554459	3.36904	0.0007543	0.00494715	32.4457	21.532	30.9707	6.31639	9.31992	7.59385	28.3162	7.74339
610	ENSMUSG00000004951	Hspb1	15507	heat shock protein 1 [Source:MGI Symbol;Acc:MGI:96240]	268.748	3.98774	0.469076	8.50126	1.87537e-17	2.39892e-15	711.21	191.396	614.253	37.8984	34.9497	22.7816	505.619	31.8765
617	ENSMUSG00000005054	Cstb	13014	cystatin B [Source:MGI Symbol;Acc:MGI:109514]	381.135	1.34639	0.325214	4.14002	3.47275e-05	0.000385652	785.186	351.69	504.565	239.233	198.825	207.312	547.147	215.123
627	ENSMUSG00000005125	Ndrg1	17988	N-myc downstream regulated gene 1 [Source:MGI Symbol;Acc:MGI:1341799]	182.954	1.78372	0.296849	6.00885	1.86848e-09	6.86576e-08	341.329	199.769	309.707	75.7967	79.9959	91.1262	283.602	82.3063
637	ENSMUSG00000005251	Ripk4	72388	receptor-interacting serine-threonine kinase 4 [Source:MGI Symbol;Acc:MGI:1919638]	206.862	1.12993	0.342736	3.2968	0.000977926	0.00612798	365.987	169.864	316.16	152.383	129.702	107.073	284.004	129.719
644	ENSMUSG00000005338	Cadm3	94332	cell adhesion molecule 3 [Source:MGI Symbol;Acc:MGI:2137858]	44.8003	1.11079	0.391597	2.83657	0.00456014	0.0208497	59.7001	63.3998	60.651	18.9492	35.7263	30.3754	61.2503	28.3503
652	ENSMUSG00000005397	Nid1	18073	nidogen 1 [Source:MGI Symbol;Acc:MGI:97342]	342.993	1.17816	0.432305	2.72529	0.00642459	0.0275052	812.44	236.852	378.101	179.228	182.515	268.822	475.798	210.188
653	ENSMUSG00000005410	Mcm5	17218	minichromosome maintenance complex component 5 [Source:MGI Symbol;Acc:MGI:103197]	26.8983	1.65814	0.499367	3.32048	0.000898627	0.00570035	36.3392	35.8867	50.3274	11.8432	18.6398	8.35324	40.8511	12.9454
654	ENSMUSG00000005413	Hmox1	15368	heme oxygenase 1 [Source:MGI Symbol;Acc:MGI:96163]	14262.8	4.87906	0.329063	14.8271	9.78169e-50	1.10944e-46	33486.6	24599.1	24678.5	1414.87	741.71	656.109	27588.1	937.564
679	ENSMUSG00000005625	Psmd4	19185	proteasome (prosome, macropain) 26S subunit, non-ATPase, 4 [Source:MGI Symbol;Acc:MGI:1201670]	1371.52	1.42044	0.198823	7.14422	9.05097e-13	5.94534e-11	2080.42	1696.24	2214.41	724.806	740.933	772.295	1997.02	746.011
688	ENSMUSG00000005683	Cs	12974	citrate synthase [Source:MGI Symbol;Acc:MGI:88529]	1865.24	1.15052	0.247232	4.65362	3.26152e-06	5.01249e-05	2308.84	2046.74	3360.32	1136.16	1181.3	1158.06	2571.97	1158.51
696	ENSMUSG00000005779	Psmb4	19172	proteasome (prosome, macropain) subunit, beta type 4 [Source:MGI Symbol;Acc:MGI:1098257]	1670.04	1.27862	0.238993	5.35004	8.79356e-08	2.14641e-06	2619.02	1751.27	2725.42	936.405	1025.97	962.141	2365.24	974.838
697	ENSMUSG00000005800	Mmp8	17394	matrix metallopeptidase 8 [Source:MGI Symbol;Acc:MGI:1202395]	40.2713	5.07632	0.863256	5.88044	4.09176e-09	1.42358e-07	175.207	31.1018	28.3898	1.5791	1.55332	3.79693	78.2328	2.30978
703	ENSMUSG00000005836	Gata6	14465	GATA binding protein 6 [Source:MGI Symbol;Acc:MGI:107516]	240.543	2.16151	0.492902	4.38528	1.15838e-05	0.0001509	672.275	127.996	379.392	84.4818	97.8591	81.2542	393.221	87.865
704	ENSMUSG00000005846	Rsl1d1	66409	ribosomal L1 domain containing 1 [Source:MGI Symbol;Acc:MGI:1913659]	1115.15	1.24495	0.317051	3.92665	8.61357e-05	0.000821427	1835.13	893.579	1976.97	690.855	664.821	629.53	1568.56	661.735
717	ENSMUSG00000005968	Tuft1	22156	tuftelin 1 [Source:MGI Symbol;Acc:MGI:109572]	434.621	1.75212	0.599293	2.92365	0.00345953	0.0168596	356.903	1136.41	517.469	169.753	52.8129	374.377	670.261	198.981
718	ENSMUSG00000005973	Rcn1	19672	reticulocalbin 1 [Source:MGI Symbol;Acc:MGI:104559]	155.031	1.10351	0.243587	4.53026	5.89118e-06	8.42241e-05	238.8	198.573	197.438	99.4832	100.966	94.9231	211.604	98.4574
737	ENSMUSG00000006205	Htra1	56213	HtrA serine peptidase 1 [Source:MGI Symbol;Acc:MGI:1929076]	28.8981	1.19759	0.478094	2.50492	0.0122479	0.0457694	44.1261	43.064	33.5516	20.5283	10.0966	22.0222	40.2473	17.549
758	ENSMUSG00000006342	Susd2	71733	sushi domain containing 2 [Source:MGI Symbol;Acc:MGI:1918983]	34.7713	1.19515	0.474504	2.51873	0.0117778	0.0443869	59.7001	44.2603	41.2943	22.1074	11.6499	29.616	48.4182	21.1244
760	ENSMUSG00000006356	Crip2	68337	cysteine rich protein 2 [Source:MGI Symbol;Acc:MGI:1915587]	361.153	1.51485	0.271967	5.56998	2.5477e-08	7.27248e-07	377.668	602.897	624.577	175.28	203.485	183.012	535.047	187.259
761	ENSMUSG00000006360	Crip1	12925	cysteine-rich protein 1 (intestinal) [Source:MGI Symbol;Acc:MGI:88501]	39.0071	1.58546	0.540092	2.93553	0.00332976	0.0163679	51.9131	68.1847	55.4892	6.31639	22.5231	29.616	58.529	19.4852
775	ENSMUSG00000006445	Epha2	13836	Eph receptor A2 [Source:MGI Symbol;Acc:MGI:95278]	401.415	2.96329	0.341208	8.68469	3.79776e-18	5.29601e-16	946.117	473.704	714.908	122.38	79.9959	71.3822	711.576	91.2528
828	ENSMUSG00000006998	Psmd2	21762	proteasome (prosome, macropain) 26S subunit, non-ATPase, 2 [Source:MGI Symbol;Acc:MGI:1096584]	2851.25	1.00208	0.203919	4.9141	8.91923e-07	1.64224e-05	4207.56	3180.76	4022.32	1865.7	2051.16	1780	3803.55	1898.95
846	ENSMUSG00000007476	Lrrc8a	241296	leucine rich repeat containing 8A [Source:MGI Symbol;Acc:MGI:2652847]	342.272	2.10918	0.299929	7.03228	2.03178e-12	1.28101e-10	774.803	448.584	443.914	114.485	135.915	135.93	555.767	128.777
847	ENSMUSG00000007564	Ppp2r1a	51792	protein phosphatase 2, regulatory subunit A, alpha [Source:MGI Symbol;Acc:MGI:1926334]	998.111	1.29242	0.2549	5.07031	3.97174e-07	8.04419e-06	1733.9	1017.99	1500.79	608.742	560.748	566.501	1417.56	578.664
858	ENSMUSG00000007659	Bcl2l1	12048	BCL2-like 1 [Source:MGI Symbol;Acc:MGI:88139]	1038.82	3.15109	0.404131	7.7972	6.32938e-15	5.75838e-13	3125.17	1563.46	913.637	223.442	212.805	194.403	1867.42	210.217
863	ENSMUSG00000007812	Zfp655	72611	zinc finger protein 655 [Source:MGI Symbol;Acc:MGI:1919861]	1226.55	1.42462	0.267854	5.31863	1.0455e-07	2.50875e-06	1765.05	1287.14	2309.9	631.639	624.434	741.16	1787.36	665.745
865	ENSMUSG00000007817	Zmiz1	328365	zinc finger, MIZ-type containing 1 [Source:MGI Symbol;Acc:MGI:3040693]	865.839	1.09643	0.281937	3.88893	0.000100686	0.000937074	1539.22	879.224	1121.4	510.838	476.092	668.259	1179.95	551.73
872	ENSMUSG00000007872	Id3	15903	inhibitor of DNA binding 3 [Source:MGI Symbol;Acc:MGI:96398]	1557.33	4.61518	0.314985	14.652	1.30742e-48	1.3902e-45	4132.28	2180.71	2664.77	95.5354	117.276	153.396	2992.59	122.069
890	ENSMUSG00000008307	1700109H08Rik	77036	RIKEN cDNA 1700109H08 gene [Source:MGI Symbol;Acc:MGI:1924286]	24.6213	1.65055	0.634361	2.60191	0.00927058	0.0368629	20.7652	20.3358	70.9746	10.2641	14.7565	10.6314	37.3585	11.884
893	ENSMUSG00000008348	Ubc	22190	ubiquitin C [Source:MGI Symbol;Acc:MGI:98889]	8307.08	3.93635	0.462912	8.50346	1.8402e-17	2.37176e-15	14948.4	8599.65	23238.4	1575.94	447.356	1032.76	15595.5	1018.69
895	ENSMUSG00000008384	Sertad1	55942	SERTA domain containing 1 [Source:MGI Symbol;Acc:MGI:1913438]	47.3858	1.61609	0.572341	2.82364	0.00474816	0.0215242	111.613	21.532	81.2982	23.6865	27.9597	18.2252	71.4811	23.2905
912	ENSMUSG00000008734	Gprc5b	64297	G protein-coupled receptor, family C, group 5, member B [Source:MGI Symbol;Acc:MGI:1927596]	13.0949	2.76188	0.736649	3.74925	0.000177363	0.00147985	36.3392	17.9433	14.1949	3.94775	3.10664	3.03754	22.8258	3.36398
937	ENSMUSG00000009293	Ube2g2	22213	ubiquitin-conjugating enzyme E2G 2 [Source:MGI Symbol;Acc:MGI:1343188]	467.711	1.53716	0.201532	7.62738	2.39574e-14	1.99798e-12	744.953	653.138	689.099	249.498	217.465	252.116	695.73	239.693
954	ENSMUSG00000009630	Ppp2cb	19053	protein phosphatase 2 (formerly 2A), catalytic subunit, beta isoform [Source:MGI Symbol;Acc:MGI:1321161]	437.445	1.23877	0.319994	3.87123	0.000108285	0.000994204	855.269	378.007	610.382	272.394	265.618	243.003	614.552	260.338
982	ENSMUSG00000010095	Slc3a2	17254	solute carrier family 3 (activators of dibasic and neutral amino acid transport), member 2 [Source:MGI Symbol;Acc:MGI:96955]	847.136	1.89375	0.332357	5.69794	1.21263e-08	3.75098e-07	1636.56	843.337	1525.31	312.661	284.257	480.691	1335.07	359.203
1003	ENSMUSG00000010651	Acaa1b	235674	acetyl-Coenzyme A acyltransferase 1B [Source:MGI Symbol;Acc:MGI:3605455]	7699.53	1.52839	0.297061	5.14502	2.67488e-07	5.74593e-06	8513.75	10597.3	15193.7	5050.75	3734.96	3106.64	11434.9	3964.12
1015	ENSMUSG00000011114	Tbrg1	21376	transforming growth factor beta regulated gene 1 [Source:MGI Symbol;Acc:MGI:1100877]	725.543	1.27954	0.267055	4.79129	1.65711e-06	2.84484e-05	1065.52	807.451	1210.44	360.824	377.457	531.57	1027.8	423.283
1021	ENSMUSG00000011257	Pabpc4	230721	poly(A) binding protein, cytoplasmic 4 [Source:MGI Symbol;Acc:MGI:2385206]	955.288	1.29212	0.344185	3.75415	0.00017393	0.00145337	1434.1	727.304	1908.57	563.738	509.489	588.524	1356.66	553.917
1023	ENSMUSG00000011305	Plin5	66968	perilipin 5 [Source:MGI Symbol;Acc:MGI:1914218]	691.715	1.27811	0.432841	2.95285	0.00314859	0.0156904	678.764	1686.67	572.959	543.21	394.543	274.138	979.466	403.964
1037	ENSMUSG00000012042	4930579F01Rik	67741	RIKEN cDNA 4930579F01 gene [Source:MGI Symbol;Acc:MGI:1914991]	48.8832	3.20784	0.519662	6.17293	6.70368e-10	2.69715e-08	48.0196	83.7356	132.916	10.2641	6.21328	12.1502	88.2238	9.54253
1064	ENSMUSG00000013483	Card14	170720	caspase recruitment domain family, member 14 [Source:MGI Symbol;Acc:MGI:2386258]	9.20891	3.44194	0.910705	3.77942	0.000157195	0.00134053	19.4674	14.3547	16.7758	0.789549	3.10664	0.759385	16.866	1.55186
1080	ENSMUSG00000013846	St3gal1	20442	ST3 beta-galactoside alpha-2,3-sialyltransferase 1 [Source:MGI Symbol;Acc:MGI:98304]	1819.68	1.27348	0.276304	4.60899	4.04624e-06	6.05975e-05	3505.43	1955.83	2262.15	937.984	1184.41	1072.25	2574.47	1064.88
1104	ENSMUSG00000014353	Tmem87b	72477	transmembrane protein 87B [Source:MGI Symbol;Acc:MGI:1919727]	1876.7	1.74715	0.29944	5.83472	5.3881e-09	1.82242e-07	3492.45	1854.15	3329.35	760.336	778.99	1044.91	2891.99	861.413
1142	ENSMUSG00000014905	Dnajb9	27362	DnaJ heat shock protein family (Hsp40) member B9 [Source:MGI Symbol;Acc:MGI:1351618]	2805.19	1.351	0.25145	5.37286	7.7499e-08	1.91363e-06	4761.73	2917.59	4412.04	1535.67	1444.59	1759.5	4030.45	1579.92
1143	ENSMUSG00000014907	Naf1	234344	nuclear assembly factor 1 ribonucleoprotein [Source:MGI Symbol;Acc:MGI:2682306]	129.889	1.09898	0.321798	3.41513	0.000637509	0.00430736	225.822	117.23	188.405	77.3758	86.2092	84.2918	177.152	82.6256
1173	ENSMUSG00000015202	Cnksr3	215748	Cnksr family member 3 [Source:MGI Symbol;Acc:MGI:2674130]	399.862	2.51192	0.354158	7.09265	1.31568e-12	8.47867e-11	934.436	363.652	743.298	110.537	122.712	124.539	680.462	119.263
1177	ENSMUSG00000015224	Cyp2j9	74519	cytochrome P450, family 2, subfamily j, polypeptide 9 [Source:MGI Symbol;Acc:MGI:1921769]	396.224	1.4078	0.25041	5.62197	1.88792e-08	5.55696e-07	615.17	668.689	442.623	241.602	202.708	206.553	575.494	216.954
1178	ENSMUSG00000015243	Abca1	11303	ATP-binding cassette, sub-family A (ABC1), member 1 [Source:MGI Symbol;Acc:MGI:99607]	6991.6	1.20724	0.283317	4.26111	2.03418e-05	0.000245096	13770	7043.36	8458.88	4220.93	4266.97	4189.53	9757.4	4225.81
1183	ENSMUSG00000015305	Sash1	70097	SAM and SH3 domain containing 1 [Source:MGI Symbol;Acc:MGI:1917347]	1554.38	1.58982	0.501849	3.16791	0.00153537	0.00884265	4021.97	633.998	2344.74	733.491	838.792	753.31	2333.57	775.198
1184	ENSMUSG00000015312	Gadd45b	17873	growth arrest and DNA-damage-inducible 45 beta [Source:MGI Symbol;Acc:MGI:107776]	2380.78	4.65849	0.358928	12.9789	1.61153e-38	1.09668e-35	5722.12	3282.44	4735.94	278.711	121.936	143.524	4580.17	181.39
1193	ENSMUSG00000015357	Clpx	270166	caseinolytic mitochondrial matrix peptidase chaperone subunit [Source:MGI Symbol;Acc:MGI:1346017]	3272.37	1.6792	0.358393	4.68538	2.79448e-06	4.41434e-05	4364.6	7712.05	2885.44	1619.37	1265.18	1787.59	4987.36	1557.38
1204	ENSMUSG00000015501	Hivep2	15273	human immunodeficiency virus type I enhancer binding protein 2 [Source:MGI Symbol;Acc:MGI:1338076]	249.919	1.62337	0.40023	4.05609	4.99013e-05	0.000522122	630.744	220.105	281.318	129.486	110.286	127.577	377.389	122.449
1209	ENSMUSG00000015568	Lpl	16956	lipoprotein lipase [Source:MGI Symbol;Acc:MGI:96820]	1481.97	1.55488	0.239248	6.49902	8.08438e-11	3.9185e-09	1824.75	2430.73	2378.29	911.14	636.861	710.025	2211.26	752.675
1210	ENSMUSG00000015575	Atp6v0e	11974	ATPase, H+ transporting, lysosomal V0 subunit E [Source:MGI Symbol;Acc:MGI:1328318]	445.942	1.21304	0.213536	5.68076	1.34101e-08	4.09599e-07	668.381	528.731	672.323	281.079	257.074	268.063	623.145	268.739
1212	ENSMUSG00000015605	Srf	20807	serum response factor [Source:MGI Symbol;Acc:MGI:106658]	158.869	1.22836	0.30623	4.01124	6.04006e-05	0.0006113	286.82	172.256	209.052	112.116	94.7525	78.2167	222.71	95.0284
1213	ENSMUSG00000015619	Gata3	14462	GATA binding protein 3 [Source:MGI Symbol;Acc:MGI:95663]	3.74556	4.70049	1.61303	2.91408	0.00356734	0.0172467	10.3826	3.58867	7.74268	0	0	0.759385	7.23799	0.253128
1214	ENSMUSG00000015627	Gata5	14464	GATA binding protein 5 [Source:MGI Symbol;Acc:MGI:109497]	6.7216	4.64688	1.33965	3.46873	0.000522925	0.0036717	16.8718	16.7471	5.16179	0.789549	0	0.759385	12.9269	0.516311
1215	ENSMUSG00000015647	Lama5	16776	laminin, alpha 5 [Source:MGI Symbol;Acc:MGI:105382]	85.9687	1.51158	0.34948	4.32523	1.52373e-05	0.000190612	162.228	93.3054	126.464	42.6357	36.503	54.6757	127.333	44.6048
1217	ENSMUSG00000015656	Hspa8	15481	heat shock protein 8 [Source:MGI Symbol;Acc:MGI:105384]	26230.5	2.8089	0.457577	6.13864	8.32333e-10	3.28549e-08	72757.5	14909.7	50061.6	7248.85	6668.4	5737.16	45909.6	6551.47
1220	ENSMUSG00000015671	Psma2	19166	proteasome (prosome, macropain) subunit, alpha type 2 [Source:MGI Symbol;Acc:MGI:104885]	1076.99	1.22664	0.226895	5.40622	6.43703e-08	1.6337e-06	1732.6	1181.87	1613.06	642.693	684.237	607.508	1509.18	644.813
1233	ENSMUSG00000015757	Ppil4	67418	peptidylprolyl isomerase (cyclophilin)-like 4 [Source:MGI Symbol;Acc:MGI:1914668]	525.767	1.00908	0.263949	3.82301	0.000131834	0.00117015	792.973	495.236	819.434	375.825	333.964	337.167	702.548	348.985
1241	ENSMUSG00000015837	Sqstm1	18412	sequestosome 1 [Source:MGI Symbol;Acc:MGI:107931]	24454.1	3.33813	0.401984	8.30412	1.00563e-16	1.17992e-14	66498.1	18199.3	48824.1	4434.9	4313.57	4454.55	44507.2	4401.01
1251	ENSMUSG00000015932	Dstn	56431	destrin [Source:MGI Symbol;Acc:MGI:1929270]	4024.29	1.75375	0.219522	7.98894	1.36108e-15	1.38659e-13	7162.71	5402.14	6058.65	1579.89	1825.15	2117.17	6207.84	1840.73
1290	ENSMUSG00000016494	Cd34	12490	CD34 antigen [Source:MGI Symbol;Acc:MGI:88329]	40.0891	1.62226	0.431893	3.75617	0.000172531	0.00144452	83.061	43.064	55.4892	22.1074	16.3099	20.5034	60.5381	19.6402
1295	ENSMUSG00000016520	Lnx2	140887	ligand of numb-protein X 2 [Source:MGI Symbol;Acc:MGI:2155959]	631.146	2.93883	0.425336	6.90942	4.86632e-12	2.90493e-10	1925.98	647.157	776.849	193.44	122.712	120.742	1116.66	145.631
1297	ENSMUSG00000016528	Mapkapk2	17164	MAP kinase-activated protein kinase 2 [Source:MGI Symbol;Acc:MGI:109298]	2404.57	2.65518	0.317215	8.3703	5.74735e-17	6.93473e-15	5698.76	2549.15	4202.99	776.916	605.018	594.599	4150.3	658.844
1300	ENSMUSG00000016554	Eif3d	55944	eukaryotic translation initiation factor 3, subunit D [Source:MGI Symbol;Acc:MGI:1933181]	576.453	1.10832	0.276989	4.00131	6.29922e-05	0.000634886	901.99	538.3	922.67	389.248	319.984	386.527	787.654	365.253
1301	ENSMUSG00000016559	H3f3b	15081	H3 histone, family 3B [Source:MGI Symbol;Acc:MGI:1101768]	38666.5	4.80146	0.277347	17.3121	3.812e-67	1.08089e-63	89452.8	57818.3	76696.4	2234.42	2281.83	3515.19	74655.8	2677.15
1318	ENSMUSG00000017002	Slpi	20568	secretory leukocyte peptidase inhibitor [Source:MGI Symbol;Acc:MGI:109297]	27.0543	1.52268	0.610302	2.49497	0.0125969	0.0468405	48.0196	47.8489	24.5185	9.47459	25.6298	6.83447	40.129	13.9796
1319	ENSMUSG00000017009	Sdc4	20971	syndecan 4 [Source:MGI Symbol;Acc:MGI:1349164]	12787.2	1.66292	0.194353	8.55618	1.16669e-17	1.56291e-15	22229.2	19015.2	17064.9	6289.55	5703.01	6421.36	19436.4	6137.97
1322	ENSMUSG00000017132	Cyth1	19157	cytohesin 1 [Source:MGI Symbol;Acc:MGI:1334257]	672.563	1.13971	0.206139	5.52886	3.2231e-08	8.87292e-07	969.477	807.451	998.806	461.886	393.766	403.993	925.245	419.882
1323	ENSMUSG00000017144	Rnd3	74194	Rho family GTPase 3 [Source:MGI Symbol;Acc:MGI:1921444]	671.081	2.00118	0.354508	5.64495	1.65225e-08	4.94019e-07	1160.26	564.617	1496.92	281.869	289.694	233.131	1073.93	268.231
1329	ENSMUSG00000017221	Psmd3	22123	proteasome (prosome, macropain) 26S subunit, non-ATPase, 3 [Source:MGI Symbol;Acc:MGI:98858]	1182.17	1.41912	0.257293	5.5156	3.476e-08	9.49232e-07	1887.04	1205.79	2069.88	637.166	644.628	648.515	1720.9	643.436
1346	ENSMUSG00000017418	Arl5b	75869	ADP-ribosylation factor-like 5B [Source:MGI Symbol;Acc:MGI:1923119]	1033.53	1.16382	0.405402	2.87079	0.00409451	0.0191795	2303.64	812.236	1171.73	880.347	567.738	465.503	1429.2	637.863
1348	ENSMUSG00000017428	Psmd11	69077	proteasome (prosome, macropain) 26S subunit, non-ATPase, 11 [Source:MGI Symbol;Acc:MGI:1916327]	1872.42	1.07022	0.241408	4.43323	9.28334e-06	0.000124753	2622.91	1935.49	3051.91	1270.38	1284.6	1069.21	2536.77	1208.06
1371	ENSMUSG00000017715	Pgs1	74451	phosphatidylglycerophosphate synthase 1 [Source:MGI Symbol;Acc:MGI:1921701]	155.452	1.5564	0.426826	3.64644	0.000265903	0.00207039	330.946	98.0903	267.123	80.534	83.8792	72.1416	232.053	78.8516
1377	ENSMUSG00000017737	Mmp9	17395	matrix metallopeptidase 9 [Source:MGI Symbol;Acc:MGI:97011]	15.0785	2.55135	0.786124	3.24548	0.00117251	0.00710648	48.0196	21.532	7.74268	4.73729	3.8833	4.55631	25.7648	4.3923
1397	ENSMUSG00000017868	Sgk2	27219	serum/glucocorticoid regulated kinase 2 [Source:MGI Symbol;Acc:MGI:1351318]	549.231	1.85945	0.48567	3.82862	0.000128864	0.00115145	417.901	1277.57	887.828	390.037	208.145	113.908	861.098	237.363
1398	ENSMUSG00000017929	B4galt5	56336	UDP-Gal:betaGlcNAc beta 1,4-galactosyltransferase, polypeptide 5 [Source:MGI Symbol;Acc:MGI:1927169]	424.875	1.06483	0.409623	2.59955	0.00933468	0.0370583	786.484	374.418	563.925	241.602	426.386	156.433	574.942	274.807
1410	ENSMUSG00000018143	Mafk	17135	v-maf musculoaponeurotic fibrosarcoma oncogene family, protein K (avian) [Source:MGI Symbol;Acc:MGI:99951]	661.295	3.15926	0.338975	9.32004	1.16295e-20	2.27417e-18	1591.14	667.493	1309.8	122.38	126.596	150.358	1189.48	133.111
1421	ENSMUSG00000018217	Pmp22	18858	peripheral myelin protein 22 [Source:MGI Symbol;Acc:MGI:97631]	54.5311	1.33588	0.354266	3.77083	0.000162705	0.00137785	76.5718	94.5016	63.2319	29.2133	28.7364	34.9317	78.1018	30.9605
1422	ENSMUSG00000018239	Zcchc10	67966	zinc finger, CCHC domain containing 10 [Source:MGI Symbol;Acc:MGI:1196228]	57.682	1.1032	0.381637	2.89071	0.00384378	0.0182513	89.5501	53.83	92.9122	28.4238	39.6096	41.7662	78.7641	36.5999
1426	ENSMUSG00000018322	Tomm34	67145	translocase of outer mitochondrial membrane 34 [Source:MGI Symbol;Acc:MGI:1914395]	161.246	1.83443	0.327056	5.60892	2.03591e-08	5.96162e-07	314.074	160.294	281.318	77.3758	68.3461	66.0665	251.895	70.5961
1431	ENSMUSG00000018347	Zkscan6	52712	zinc finger with KRAB and SCAN domains 6 [Source:MGI Symbol;Acc:MGI:1289293]	72.1345	1.17851	0.337925	3.48748	0.000487589	0.00345783	129.783	80.147	90.3313	47.3729	39.6096	45.5631	100.087	44.1819
1436	ENSMUSG00000018378	Cuedc1	103841	CUE domain containing 1 [Source:MGI Symbol;Acc:MGI:2144281]	35.4019	1.0551	0.418352	2.52204	0.0116676	0.0440646	53.2109	33.4943	56.7797	22.8969	20.9698	25.0597	47.8283	22.9755
1438	ENSMUSG00000018381	Abi3	66610	ABI gene family, member 3 [Source:MGI Symbol;Acc:MGI:1913860]	26.199	1.94115	0.546181	3.55403	0.000379372	0.00279043	54.5088	25.1207	45.1657	8.68504	7.7666	15.9471	41.5984	10.7996
1449	ENSMUSG00000018427	Ypel2	77864	yippee like 2 [Source:MGI Symbol;Acc:MGI:1925114]	974.755	2.83921	0.307793	9.22441	2.85113e-20	5.27242e-18	2338.69	1716.58	1076.23	226.601	232.998	257.432	1710.5	239.01
1456	ENSMUSG00000018459	Slc13a3	114644	solute carrier family 13 (sodium-dependent dicarboxylate transporter), member 3 [Source:MGI Symbol;Acc:MGI:2149635]	100.493	1.16258	0.407023	2.85631	0.00428602	0.0198849	155.739	175.845	85.1695	60.0057	40.3863	85.8105	138.918	62.0675
1476	ENSMUSG00000018583	G3bp1	27041	GTPase activating protein (SH3 domain) binding protein 1 [Source:MGI Symbol;Acc:MGI:1351465]	1201.08	1.22499	0.408614	2.99791	0.00271835	0.0139257	2160.88	674.67	2211.83	694.014	828.696	636.365	1682.46	719.691
1481	ENSMUSG00000018648	Dusp14	56405	dual specificity phosphatase 14 [Source:MGI Symbol;Acc:MGI:1927168]	9.63104	2.70078	1.00213	2.69505	0.00703779	0.0296959	31.1479	4.78489	14.1949	0.789549	1.55332	5.3157	16.7092	2.55285
1499	ENSMUSG00000018761	Mpdu1	24070	mannose-P-dolichol utilization defect 1 [Source:MGI Symbol;Acc:MGI:1346040]	453.045	1.0759	0.214141	5.02424	5.05417e-07	9.91771e-06	519.131	649.549	674.904	305.556	288.917	280.213	614.528	291.562
1502	ENSMUSG00000018774	Cd68	12514	CD68 antigen [Source:MGI Symbol;Acc:MGI:88342]	123.181	1.50584	0.369169	4.07899	4.5231e-05	0.000481448	243.992	120.819	181.953	54.4789	52.0362	85.8105	182.254	64.1085
1519	ENSMUSG00000018900	Slc22a5	20520	solute carrier family 22 (organic cation transporter), member 5 [Source:MGI Symbol;Acc:MGI:1329012]	713.831	2.0015	0.243996	8.20302	2.34428e-16	2.64128e-14	1283.55	965.352	1178.18	350.56	254.744	250.597	1142.36	285.3
1520	ENSMUSG00000018906	P4ha2	18452	procollagen-proline, 2-oxoglutarate 4-dioxygenase (proline 4-hydroxylase), alpha II polypeptide [Source:MGI Symbol;Acc:MGI:894286]	83.2467	1.26462	0.383707	3.2958	0.000981423	0.00613858	138.868	69.3809	144.53	59.2162	41.163	46.3225	117.593	48.9005
1525	ENSMUSG00000018927	Ccl6	20305	chemokine (C-C motif) ligand 6 [Source:MGI Symbol;Acc:MGI:98263]	207.858	1.20752	0.357201	3.38052	0.000723499	0.00478387	368.583	247.618	254.218	71.849	153.002	151.877	290.14	125.576
1538	ENSMUSG00000019082	Slc25a22	68267	solute carrier family 25 (mitochondrial carrier, glutamate), member 22 [Source:MGI Symbol;Acc:MGI:1915517]	2379.76	1.87871	0.333003	5.64172	1.68362e-08	5.02516e-07	2169.97	4725.08	4330.74	1259.33	807.726	985.682	3741.93	1017.58
1551	ENSMUSG00000019210	Atp6v1e1	11973	ATPase, H+ transporting, lysosomal V1 subunit E1 [Source:MGI Symbol;Acc:MGI:894326]	1406.64	1.37234	0.238602	5.7516	8.84003e-09	2.82698e-07	2445.11	1783.57	1859.53	928.51	753.36	669.778	2029.4	783.882
1579	ENSMUSG00000019505	Ubb	22187	ubiquitin B [Source:MGI Symbol;Acc:MGI:98888]	8113.98	2.4692	0.326055	7.57296	3.64828e-14	2.96977e-12	17535	7482.38	16219.6	2447.6	2333.86	2665.44	13745.7	2482.3
1582	ENSMUSG00000019539	Rcn3	52377	reticulocalbin 3, EF-hand calcium binding domain [Source:MGI Symbol;Acc:MGI:1277122]	36.4313	1.39022	0.419906	3.31078	0.000930376	0.00587764	51.9131	41.8678	64.5224	15.791	20.1932	24.3003	52.7678	20.0948
1585	ENSMUSG00000019577	Pdk4	27273	pyruvate dehydrogenase kinase, isoenzyme 4 [Source:MGI Symbol;Acc:MGI:1351481]	17202.9	8.57114	0.412742	20.7664	8.7241e-96	7.42115e-92	32256.2	15519.8	55170.5	104.22	75.336	91.1262	34315.5	90.2276
1598	ENSMUSG00000019732	Calr3	73316	calreticulin 3 [Source:MGI Symbol;Acc:MGI:1920566]	43.847	1.96155	0.489501	4.00725	6.14303e-05	0.000620865	60.9979	50.2414	98.074	23.6865	20.9698	9.11262	69.7711	17.923
1635	ENSMUSG00000019838	Slc16a10	72472	solute carrier family 16 (monocarboxylic acid transporters), member 10 [Source:MGI Symbol;Acc:MGI:1919722]	2346.28	1.56537	0.261778	5.97974	2.23495e-09	8.15948e-08	3604.07	2634.08	4284.29	1194.59	977.038	1383.6	3507.48	1185.08
1653	ENSMUSG00000019873	Reep3	28193	receptor accessory protein 3 [Source:MGI Symbol;Acc:MGI:88930]	2146.84	1.05237	0.268374	3.9213	8.8073e-05	0.000834756	3495.05	1960.61	3235.15	1524.62	1338.96	1326.65	2896.94	1396.74
1658	ENSMUSG00000019880	Rspo3	72780	R-spondin 3 [Source:MGI Symbol;Acc:MGI:1920030]	69.7009	1.64327	0.35801	4.59002	4.43209e-06	6.57968e-05	137.57	82.5394	96.7835	27.6342	34.9497	38.7286	105.631	33.7709
1663	ENSMUSG00000019899	Lama2	16773	laminin, alpha 2 [Source:MGI Symbol;Acc:MGI:99912]	40.8785	1.05559	0.408076	2.58674	0.0096889	0.038201	70.0827	47.8489	47.7466	19.7387	27.9597	31.8942	55.2261	26.5309
1669	ENSMUSG00000019923	Zwint	52696	ZW10 interactor [Source:MGI Symbol;Acc:MGI:1289227]	886.92	1.44993	0.326438	4.44167	8.92629e-06	0.000120718	1569.07	721.323	1605.32	504.522	484.636	436.646	1298.57	475.268
1671	ENSMUSG00000019929	Dcn	13179	decorin [Source:MGI Symbol;Acc:MGI:94872]	1889.3	1.01886	0.251259	4.05499	5.01359e-05	0.000523933	3142.04	2260.86	2187.31	1102.21	1124.6	1518.77	2530.07	1248.53
1681	ENSMUSG00000019960	Dusp6	67603	dual specificity phosphatase 6 [Source:MGI Symbol;Acc:MGI:1914853]	2359.79	3.06506	0.398557	7.69038	1.46704e-14	1.26054e-12	5674.1	4311.19	2662.19	668.748	253.968	588.524	4215.83	503.746
1685	ENSMUSG00000019970	Sgk1	20393	serum/glucocorticoid regulated kinase 1 [Source:MGI Symbol;Acc:MGI:1340062]	1098.55	2.02635	0.326829	6.20004	5.64472e-10	2.30296e-08	2459.38	1306.28	1526.6	532.946	302.121	463.984	1764.09	433.017
1697	ENSMUSG00000019992	Mtfr2	71804	mitochondrial fission regulator 2 [Source:MGI Symbol;Acc:MGI:1919054]	7.7382	3.16532	1.03433	3.06027	0.00221136	0.0118621	6.48914	10.766	24.5185	0.789549	3.10664	0.759385	13.9245	1.55186
1705	ENSMUSG00000020015	Cdk17	237459	cyclin-dependent kinase 17 [Source:MGI Symbol;Acc:MGI:97517]	492.22	1.28907	0.286686	4.49643	6.91028e-06	9.72411e-05	896.799	521.553	677.485	329.242	226.008	302.235	698.612	285.828
1711	ENSMUSG00000020023	Tmcc3	319880	transmembrane and coiled coil domains 3 [Source:MGI Symbol;Acc:MGI:2442900]	393.73	1.17755	0.205973	5.71704	1.08398e-08	3.40254e-07	580.129	525.142	532.955	243.181	217.465	263.507	546.075	241.384
1714	ENSMUSG00000020029	Nudt4	71207	nudix (nucleoside diphosphate linked moiety X)-type motif 4 [Source:MGI Symbol;Acc:MGI:1918457]	6521.88	1.98769	0.243563	8.16091	3.32513e-16	3.64971e-14	13344.3	8292.22	9615.12	2531.29	2458.9	2889.46	10417.2	2626.55
1732	ENSMUSG00000020075	Ddx21	56200	DEAD (Asp-Glu-Ala-Asp) box polypeptide 21 [Source:MGI Symbol;Acc:MGI:1860494]	1398.4	1.18673	0.411347	2.88499	0.0039143	0.0185189	2192.03	788.311	2849.31	991.674	760.35	808.745	1943.22	853.59
1734	ENSMUSG00000020077	Srgn	19073	serglycin [Source:MGI Symbol;Acc:MGI:97756]	217.215	1.86623	0.317623	5.87562	4.21274e-09	1.45673e-07	484.09	287.094	251.637	88.4295	98.6358	93.4044	340.94	93.4899
1762	ENSMUSG00000020123	Avpr1a	54140	arginine vasopressin receptor 1A [Source:MGI Symbol;Acc:MGI:1859216]	855.877	3.18924	0.360492	8.84691	8.99783e-19	1.35469e-16	1977.89	1825.44	824.596	162.647	133.585	211.109	1542.64	169.114
1765	ENSMUSG00000020130	Tbc1d15	66687	TBC1 domain family, member 15 [Source:MGI Symbol;Acc:MGI:1913937]	2541.77	1.58329	0.276727	5.72148	1.05598e-08	3.32077e-07	4966.79	2551.54	3916.51	1241.17	1243.43	1331.2	3811.61	1271.94
1788	ENSMUSG00000020176	Grb10	14783	growth factor receptor bound protein 10 [Source:MGI Symbol;Acc:MGI:103232]	98.4671	1.0609	0.396878	2.67311	0.00751515	0.0312604	172.611	68.1847	158.725	56.058	70.676	64.5477	133.174	63.7606
1791	ENSMUSG00000020182	Ddc	13195	dopa decarboxylase [Source:MGI Symbol;Acc:MGI:94876]	539.152	1.02989	0.36886	2.79208	0.00523707	0.023318	477.601	1074.21	619.415	452.412	374.35	236.928	723.741	354.563
1793	ENSMUSG00000020184	Mdm2	17246	transformed mouse 3T3 cell double minute 2 [Source:MGI Symbol;Acc:MGI:96952]	3249.71	3.86122	0.38403	10.0545	8.77859e-24	2.44836e-21	9463.76	2961.85	5817.34	476.888	412.406	366.024	6080.98	418.439
1797	ENSMUSG00000020190	Mknk2	17347	MAP kinase-interacting serine/threonine kinase 2 [Source:MGI Symbol;Acc:MGI:894279]	2800.18	1.64439	0.242805	6.77245	1.26624e-11	7.10973e-10	5060.23	3326.7	4342.36	1544.36	1375.46	1151.99	4243.09	1357.27
1800	ENSMUSG00000020205	Phlda1	21664	pleckstrin homology like domain, family A, member 1 [Source:MGI Symbol;Acc:MGI:1096880]	1386.6	3.46821	0.426289	8.13582	4.09157e-16	4.43375e-14	4587.82	1366.09	1676.29	228.969	250.861	209.59	2543.4	229.807
1805	ENSMUSG00000020224	Llph	66225	LLP homolog, long-term synaptic facilitation (Aplysia) [Source:MGI Symbol;Acc:MGI:1913475]	366.234	1.06656	0.313772	3.39916	0.000675922	0.00451845	519.131	305.037	663.29	243.181	227.561	239.206	495.819	236.65
1807	ENSMUSG00000020227	Irak3	73914	interleukin-1 receptor-associated kinase 3 [Source:MGI Symbol;Acc:MGI:1921164]	30.0511	1.89852	0.607873	3.12322	0.00178883	0.0100262	83.061	19.1396	40.0039	16.5805	11.6499	9.87201	47.4015	12.7008
1817	ENSMUSG00000020250	Txnrd1	50493	thioredoxin reductase 1 [Source:MGI Symbol;Acc:MGI:1354175]	8014.21	2.80903	0.477719	5.88009	4.10053e-09	1.42372e-07	23059.8	4180.8	14840.1	2085.2	2156.01	1763.29	14026.9	2001.5
1819	ENSMUSG00000020255	D10Wsu102e	28109	DNA segment, Chr 10, Wayne State University 102, expressed [Source:MGI Symbol;Acc:MGI:106381]	467.574	1.86836	0.50445	3.70375	0.000212439	0.00171453	1418.53	271.543	512.308	164.226	201.155	237.688	734.125	201.023
1832	ENSMUSG00000020275	Rel	19696	reticuloendotheliosis oncogene [Source:MGI Symbol;Acc:MGI:97897]	193.762	1.2347	0.338832	3.644	0.000268431	0.00208553	384.157	203.358	228.409	139.75	118.052	88.8481	271.975	115.55
1835	ENSMUSG00000020282	Rhbdf1	13650	rhomboid 5 homolog 1 [Source:MGI Symbol;Acc:MGI:104328]	85.6179	1.58404	0.340959	4.64585	3.38681e-06	5.17698e-05	167.42	100.483	117.431	37.1088	40.3863	50.8788	128.444	42.7913
1842	ENSMUSG00000020300	Cpeb4	67579	cytoplasmic polyadenylation element binding protein 4 [Source:MGI Symbol;Acc:MGI:1914829]	1248.66	1.11506	0.30818	3.6182	0.000296655	0.00227036	2154.39	1959.41	1011.71	859.819	750.253	756.348	1708.51	788.807
1859	ENSMUSG00000020349	Ppp2ca	19052	protein phosphatase 2 (formerly 2A), catalytic subunit, alpha isoform [Source:MGI Symbol;Acc:MGI:1321159]	2551.08	1.31336	0.273543	4.8013	1.57636e-06	2.71169e-05	3645.6	2489.34	4779.82	1491.46	1509.05	1391.19	3638.25	1463.9
1861	ENSMUSG00000020358	Hnrnpab	15384	heterogeneous nuclear ribonucleoprotein A/B [Source:MGI Symbol;Acc:MGI:1330294]	1481.83	1.02598	0.272628	3.76328	0.000167697	0.00141239	2280.28	1313.45	2369.26	952.986	1017.42	957.585	1987.67	975.998
1865	ENSMUSG00000020363	Gfpt2	14584	glutamine fructose-6-phosphate transaminase 2 [Source:MGI Symbol;Acc:MGI:1338883]	17.7763	2.74289	0.729967	3.75755	0.000171583	0.0014385	45.424	20.3358	27.0994	1.5791	3.10664	9.11262	30.9531	4.59945
1886	ENSMUSG00000020407	Upp1	22271	uridine phosphorylase 1 [Source:MGI Symbol;Acc:MGI:1097668]	10.4826	1.90902	0.732751	2.60528	0.00917991	0.0365499	19.4674	9.56979	20.6472	4.73729	5.43662	3.03754	16.5615	4.40382
1893	ENSMUSG00000020423	Btg2	12227	B cell translocation gene 2, anti-proliferative [Source:MGI Symbol;Acc:MGI:108384]	10074.7	7.53013	0.497532	15.135	9.52045e-52	1.24593e-48	29362.1	20555.9	10204.9	182.386	41.9396	100.998	20040.9	108.441
1895	ENSMUSG00000020427	Igfbp3	16009	insulin-like growth factor binding protein 3 [Source:MGI Symbol;Acc:MGI:96438]	323.038	1.48503	0.297524	4.99129	5.99785e-07	1.15646e-05	606.086	441.406	380.682	150.014	140.575	219.462	476.058	170.017
1896	ENSMUSG00000020429	Igfbp1	16006	insulin-like growth factor binding protein 1 [Source:MGI Symbol;Acc:MGI:96436]	29578.3	4.60895	0.495485	9.30189	1.37966e-20	2.63732e-18	74491.4	54229.6	41762.7	2545.51	678.801	3761.99	56827.9	2328.77
1898	ENSMUSG00000020431	Adcy1	432530	adenylate cyclase 1 [Source:MGI Symbol;Acc:MGI:99677]	149.615	4.66813	0.53153	8.78244	1.59966e-18	2.32607e-16	378.966	119.622	365.197	4.73729	13.9799	15.1877	287.928	11.3016
1919	ENSMUSG00000020467	Efemp1	216616	epidermal growth factor-containing fibulin-like extracellular matrix protein 1 [Source:MGI Symbol;Acc:MGI:1339998]	105.915	1.80116	0.274336	6.56553	5.18479e-11	2.59438e-09	172.611	165.079	156.144	45.0043	43.4929	53.157	164.611	47.2181
1922	ENSMUSG00000020473	Aebp1	11568	AE binding protein 1 [Source:MGI Symbol;Acc:MGI:1197012]	64.0731	1.321	0.371284	3.55792	0.000373799	0.00275658	79.1675	74.1658	121.302	33.9506	30.2897	45.5631	91.5451	36.6012
1954	ENSMUSG00000020538	Srebf1	20787	sterol regulatory element binding transcription factor 1 [Source:MGI Symbol;Acc:MGI:107606]	1920.81	1.30363	0.315511	4.13179	3.59951e-05	0.000397653	1700.15	3564.75	2937.06	1083.26	1340.51	899.112	2733.99	1107.63
1958	ENSMUSG00000020547	Bzw2	66912	basic leucine zipper and W2 domains 2 [Source:MGI Symbol;Acc:MGI:1914162]	141.821	1.15948	0.265739	4.36321	1.28165e-05	0.000164842	201.163	169.864	216.795	101.852	79.9959	81.2542	195.941	87.7007
1960	ENSMUSG00000020553	Pctp	18559	phosphatidylcholine transfer protein [Source:MGI Symbol;Acc:MGI:107375]	248.833	3.85217	0.539985	7.13384	9.76099e-13	6.38707e-11	381.561	191.396	823.305	53.6893	23.2998	19.744	465.421	32.2444
1961	ENSMUSG00000020561	Twistnb	28071	twist basic helix-loop-helix transcription factor 1 neighbor [Source:MGI Symbol;Acc:MGI:106292]	503.448	1.0636	0.360808	2.94784	0.00320002	0.0158677	642.425	367.241	1033.65	327.663	326.974	322.739	681.105	325.792
1973	ENSMUSG00000020592	Sdc1	20969	syndecan 1 [Source:MGI Symbol;Acc:MGI:1349162]	4264.93	1.87067	0.330499	5.66014	1.51246e-08	4.56232e-07	9720.73	4191.57	6182.53	1800.96	2190.96	1502.82	6698.28	1831.58
1974	ENSMUSG00000020593	Lpin1	14245	lipin 1 [Source:MGI Symbol;Acc:MGI:1891340]	18869.1	1.94177	0.24431	7.94795	1.89625e-15	1.8977e-13	29567.1	23583.5	36681	8283.16	6521.61	8578.02	29943.9	7794.26
1977	ENSMUSG00000020601	Trib2	217410	tribbles pseudokinase 2 [Source:MGI Symbol;Acc:MGI:2145021]	45.5613	1.5025	0.394911	3.80466	0.000141997	0.00123696	89.5501	62.2036	50.3274	23.6865	23.2998	24.3003	67.3604	23.7622
1980	ENSMUSG00000020607	Fam84a	105005	family with sequence similarity 84, member A [Source:MGI Symbol;Acc:MGI:2145011]	17.0931	1.52809	0.559442	2.73146	0.00630551	0.0270895	29.85	17.9433	28.3898	8.68504	10.0966	7.59385	25.3944	8.79182
1990	ENSMUSG00000020627	Klhl29	208439	kelch-like 29 [Source:MGI Symbol;Acc:MGI:2683857]	16.0369	2.30212	0.73898	3.11526	0.00183782	0.0102313	44.1261	19.1396	16.7758	1.5791	7.7666	6.83447	26.6805	5.39339
1997	ENSMUSG00000020641	Rsad2	58185	radical S-adenosyl methionine domain containing 2 [Source:MGI Symbol;Acc:MGI:1929628]	96.2446	1.56031	0.610865	2.55426	0.0106414	0.0410805	307.585	51.4376	72.265	56.8475	55.9195	33.4129	143.763	48.7267
2008	ENSMUSG00000020656	Grhl1	195733	grainyhead like transcription factor 1 [Source:MGI Symbol;Acc:MGI:2182540]	72.0822	4.35988	0.674021	6.46846	9.90049e-11	4.69184e-09	150.548	33.4943	228.409	5.52684	3.8833	10.6314	137.484	6.68051
2009	ENSMUSG00000020657	Dnajc27	217378	DnaJ heat shock protein family (Hsp40) member C27 [Source:MGI Symbol;Acc:MGI:2443036]	25.671	1.65357	0.585577	2.82384	0.00474523	0.0215224	49.3175	26.3169	41.2943	14.2119	4.65996	18.2252	38.9762	12.3657
2010	ENSMUSG00000020658	Efr3b	668212	EFR3 homolog B [Source:MGI Symbol;Acc:MGI:2444851]	21.801	2.9733	0.808011	3.67978	0.000233435	0.00185321	66.1892	5.98112	43.8752	5.52684	5.43662	3.79693	38.6818	4.92013
2025	ENSMUSG00000020689	Itgb3	16416	integrin beta 3 [Source:MGI Symbol;Acc:MGI:96612]	174.416	1.75766	0.38154	4.60674	4.09031e-06	6.12036e-05	299.798	284.701	223.247	54.4789	56.6962	127.577	269.249	79.5839
2027	ENSMUSG00000020692	Nle1	217011	notchless homolog 1 [Source:MGI Symbol;Acc:MGI:2429770]	87.1432	1.90845	0.504692	3.78142	0.000155935	0.0013328	180.398	45.4565	187.115	33.9506	34.173	41.7662	137.656	36.6299
2045	ENSMUSG00000020720	Psmd12	66997	proteasome (prosome, macropain) 26S subunit, non-ATPase, 12 [Source:MGI Symbol;Acc:MGI:1914247]	1362.42	1.23149	0.241711	5.09489	3.4895e-07	7.22224e-06	2154.39	1421.11	2157.63	875.61	817.046	748.754	1911.05	813.803
2066	ENSMUSG00000020776	Fbf1	217335	Fas (TNFRSF6) binding factor 1 [Source:MGI Symbol;Acc:MGI:1922033]	1449.08	3.98479	0.43992	9.058	1.3287e-19	2.30664e-17	1524.95	2268.04	4384.94	247.918	94.7525	173.899	2725.98	172.19
2067	ENSMUSG00000020777	Acox1	11430	acyl-Coenzyme A oxidase 1, palmitoyl [Source:MGI Symbol;Acc:MGI:1330812]	50541	1.19095	0.211808	5.62276	1.87931e-08	5.54119e-07	69073	66834.2	74971.1	27833.2	27129.5	37405	70292.8	30789.2
2068	ENSMUSG00000020778	Ten1	69535	TEN1 telomerase capping complex subunit [Source:MGI Symbol;Acc:MGI:1916785]	13.9845	1.97204	0.659997	2.98796	0.0028085	0.0143152	14.2761	20.3358	32.2612	6.31639	3.8833	6.83447	22.291	5.67805
2081	ENSMUSG00000020806	Rhbdf2	217344	rhomboid 5 homolog 2 [Source:MGI Symbol;Acc:MGI:2442473]	257.818	1.95144	0.430627	4.53163	5.85299e-06	8.38189e-05	721.592	289.486	218.086	101.852	112.616	103.276	409.721	105.915
2083	ENSMUSG00000020810	Cygb	114886	cytoglobin [Source:MGI Symbol;Acc:MGI:2149481]	106.177	1.09462	0.367341	2.97985	0.00288388	0.014624	142.761	102.875	188.405	52.8998	57.4728	92.645	144.681	67.6725
2084	ENSMUSG00000020812	1810032O08Rik		RIKEN cDNA 1810032O08 gene [Source:MGI Symbol;Acc:MGI:1913543]	90.6682	2.6627	0.49745	5.3527	8.66516e-08	2.11811e-06	212.844	62.2036	194.858	19.7387	20.1932	34.1723	156.635	24.7014
2106	ENSMUSG00000020859	Spag9	70834	sperm associated antigen 9 [Source:MGI Symbol;Acc:MGI:1918084]	2154.67	1.24016	0.384216	3.22778	0.00124757	0.0074788	4799.37	1514.42	2769.3	1459.88	1289.26	1095.79	3027.7	1281.64
2121	ENSMUSG00000020889	Nr1d1	217166	nuclear receptor subfamily 1, group D, member 1 [Source:MGI Symbol;Acc:MGI:2444210]	1000.49	2.76253	0.258858	10.672	1.37667e-26	5.09158e-24	1985.68	1611.31	1635	192.65	324.644	253.635	1744	256.976
2145	ENSMUSG00000020941	Map3k14	53859	mitogen-activated protein kinase kinase kinase 14 [Source:MGI Symbol;Acc:MGI:1858204]	121.5	3.74766	0.542105	6.91316	4.73968e-12	2.8393e-10	362.094	78.9507	237.442	16.5805	23.2998	10.6314	226.162	16.8372
2174	ENSMUSG00000021025	Nfkbia	18035	nuclear factor of kappa light polypeptide gene enhancer in B cells inhibitor, alpha [Source:MGI Symbol;Acc:MGI:104741]	651.959	1.14578	0.268922	4.26062	2.03862e-05	0.000245457	973.371	878.028	842.662	476.888	462.113	278.694	898.02	405.898
2178	ENSMUSG00000021036	Sptlc2	20773	serine palmitoyltransferase, long chain base subunit 2 [Source:MGI Symbol;Acc:MGI:108074]	597.441	1.61407	0.397421	4.06136	4.87885e-05	0.000513638	1413.33	430.64	858.147	255.024	284.257	343.242	900.707	294.175
2191	ENSMUSG00000021067	Sav1	64010	salvador family WW domain containing 1 [Source:MGI Symbol;Acc:MGI:1927144]	174.764	1.23608	0.396962	3.11385	0.00184663	0.0102637	315.372	112.445	308.417	106.589	100.966	104.795	245.411	104.117
2202	ENSMUSG00000021102	Glrx5	73046	glutaredoxin 5 [Source:MGI Symbol;Acc:MGI:1920296]	917.799	1.79666	0.268612	6.68868	2.25189e-11	1.21581e-09	1601.52	972.53	1702.1	393.985	401.533	435.128	1425.38	410.215
2205	ENSMUSG00000021109	Hif1a	15251	hypoxia inducible factor 1, alpha subunit [Source:MGI Symbol;Acc:MGI:106918]	1545.46	1.95845	0.365105	5.36408	8.1361e-08	2.00028e-06	4005.1	1514.42	1855.66	701.12	599.581	596.877	2458.39	632.526
2214	ENSMUSG00000021123	Rdh12	77974	retinol dehydrogenase 12 [Source:MGI Symbol;Acc:MGI:1925224]	7.29924	4.76523	1.33353	3.57339	0.000352395	0.00262491	23.3609	5.98112	12.9045	0.789549	0	0.759385	14.0822	0.516311
2216	ENSMUSG00000021125	Arg2	11847	arginase type II [Source:MGI Symbol;Acc:MGI:1330806]	23.1507	1.84145	0.677887	2.71646	0.0065984	0.0281139	62.2957	17.9433	28.3898	15.0014	3.8833	11.3908	36.2096	10.0918
2217	ENSMUSG00000021127	Zfp36l1	12192	zinc finger protein 36, C3H type-like 1 [Source:MGI Symbol;Acc:MGI:107946]	1726.64	2.24742	0.357571	6.28523	3.27369e-10	1.4208e-08	4263.36	2394.84	1899.54	489.52	495.509	817.098	2852.58	600.709
2227	ENSMUSG00000021149	Gtpbp4	69237	GTP binding protein 4 [Source:MGI Symbol;Acc:MGI:1916487]	1329.29	1.23432	0.360361	3.42524	0.000614248	0.00416841	2227.07	910.326	2459.59	889.032	742.487	747.235	1865.66	792.918
2231	ENSMUSG00000021178	Psmc1	19179	protease (prosome, macropain) 26S subunit, ATPase 1 [Source:MGI Symbol;Acc:MGI:106054]	2369.73	1.18945	0.196231	6.06146	1.3489e-09	5.11109e-08	3186.17	2921.18	3777.14	1481.98	1349.83	1502.06	3294.83	1444.63
2258	ENSMUSG00000021226	Acot2	171210	acyl-CoA thioesterase 2 [Source:MGI Symbol;Acc:MGI:2159605]	353.772	3.09003	0.481345	6.41957	1.36657e-10	6.3523e-09	638.531	226.086	1034.94	83.6922	86.9859	52.3976	633.185	74.3586
2261	ENSMUSG00000021235	Coq6	217707	coenzyme Q6 monooxygenase [Source:MGI Symbol;Acc:MGI:1924408]	149.677	1.11126	0.260682	4.26288	2.01804e-05	0.000243496	206.355	181.826	225.828	79.7445	104.072	100.239	204.67	94.6852
2271	ENSMUSG00000021250	Fos	14281	FBJ osteosarcoma oncogene [Source:MGI Symbol;Acc:MGI:95574]	1490.93	6.62151	0.945178	7.00557	2.45988e-12	1.54428e-10	4926.55	3543.21	385.844	24.476	41.163	24.3003	2951.87	29.9798
2285	ENSMUSG00000021270	Hsp90aa1	15519	heat shock protein 90, alpha (cytosolic), class A member 1 [Source:MGI Symbol;Acc:MGI:96250]	5255.43	2.04675	0.347449	5.89081	3.84312e-09	1.3481e-07	12100.9	4430.81	8856.34	2034.67	2221.25	1888.59	8462.7	2048.17
2293	ENSMUSG00000021282	Eif5	217869	eukaryotic translation initiation factor 5 [Source:MGI Symbol;Acc:MGI:95309]	6656.13	1.12917	0.369768	3.05374	0.00226008	0.0120347	11618.2	4156.88	11632.1	4198.03	4354.73	3976.9	9135.71	4176.55
2308	ENSMUSG00000021338	Carmil1	68732	capping protein regulator and myosin 1 linker 1 [Source:MGI Symbol;Acc:MGI:1915982]	706.113	1.43523	0.30891	4.64609	3.38282e-06	5.17553e-05	964.286	1400.78	727.812	318.188	348.72	476.894	1030.96	381.267
2330	ENSMUSG00000021411	Pxdc1	66895	PX domain containing 1 [Source:MGI Symbol;Acc:MGI:1914145]	521.044	1.01021	0.264243	3.82304	0.000131818	0.00117015	876.034	504.806	708.456	321.346	354.157	361.467	696.432	345.657
2341	ENSMUSG00000021453	Gadd45g	23882	growth arrest and DNA-damage-inducible 45 gamma [Source:MGI Symbol;Acc:MGI:1346325]	1336.44	3.89708	0.543989	7.1639	7.84136e-13	5.21113e-11	3919.44	1741.7	1853.08	329.242	58.2495	116.945	2504.74	168.146
2343	ENSMUSG00000021458	2010111I01Rik	72061	RIKEN cDNA 2010111I01 gene [Source:MGI Symbol;Acc:MGI:1919311]	418.148	1.17811	0.34797	3.38567	0.000710054	0.00471328	798.164	312.214	629.738	242.392	278.821	247.56	580.039	256.257
2351	ENSMUSG00000021477	Ctsl	13039	cathepsin L [Source:MGI Symbol;Acc:MGI:88564]	55162.7	3.17044	0.327279	9.68728	3.41505e-22	7.44875e-20	131806	58286	107798	10005.2	9429.43	13652.2	99296.5	11028.9
2360	ENSMUSG00000021493	Pdlim7	67399	PDZ and LIM domain 7 [Source:MGI Symbol;Acc:MGI:1914649]	91.7267	1.60623	0.478141	3.35932	0.000781337	0.00508916	231.013	96.8941	86.46	45.0043	27.9597	63.029	138.122	45.331
2394	ENSMUSG00000021585	Cast	12380	calpastatin [Source:MGI Symbol;Acc:MGI:1098236]	1261.77	1.48719	0.320265	4.64364	3.42316e-06	5.22785e-05	2044.08	1059.85	2476.37	677.433	679.577	633.327	1860.1	663.446
2431	ENSMUSG00000021675	F2rl2	14064	coagulation factor II (thrombin) receptor-like 2 [Source:MGI Symbol;Acc:MGI:1298208]	23.7775	3.39982	0.779748	4.36016	1.2997e-05	0.000166129	79.1675	38.2791	12.9045	1.5791	4.65996	6.07508	43.4504	4.10471
2443	ENSMUSG00000021701	Plk2	20620	polo like kinase 2 [Source:MGI Symbol;Acc:MGI:1099790]	143.038	1.009	0.285954	3.52855	0.000417841	0.00302113	203.759	223.694	145.821	82.9027	104.849	97.2013	191.091	94.9843
2460	ENSMUSG00000021728	Emb	13723	embigin [Source:MGI Symbol;Acc:MGI:95321]	17.1667	2.10616	0.587167	3.58699	0.000334514	0.00250703	37.637	22.7282	23.2281	7.89549	5.43662	6.07508	27.8644	6.46906
2473	ENSMUSG00000021759	Plpp1	19012	phospholipid phosphatase 1 [Source:MGI Symbol;Acc:MGI:108412]	207.391	1.32627	0.307296	4.31593	1.58934e-05	0.000197657	381.561	216.516	291.641	123.959	93.9758	136.689	296.573	118.208
2476	ENSMUSG00000021765	Fst	14313	follistatin [Source:MGI Symbol;Acc:MGI:95586]	1231.2	5.30297	0.515637	10.2843	8.29494e-25	2.66268e-22	4269.85	1764.43	1170.44	70.2699	25.6298	86.5699	2401.57	60.8232
2505	ENSMUSG00000021823	Vcl	22330	vinculin [Source:MGI Symbol;Acc:MGI:98927]	623.117	1.52788	0.271575	5.62599	1.84446e-08	5.46573e-07	1104.45	665.1	1006.55	377.404	294.354	290.845	925.367	320.868
2511	ENSMUSG00000021838	Samd4	74480	sterile alpha motif domain containing 4 [Source:MGI Symbol;Acc:MGI:1921730]	132.641	1.27387	0.357435	3.56392	0.000365359	0.00270413	216.737	107.66	238.733	78.9549	84.6559	69.1041	187.71	77.5716
2522	ENSMUSG00000021890	Eaf1	74427	ELL associated factor 1 [Source:MGI Symbol;Acc:MGI:1921677]	1246.7	1.89564	0.373391	5.07682	3.83801e-07	7.83866e-06	2844.84	929.465	2121.5	545.578	545.215	493.6	1965.27	528.131
2556	ENSMUSG00000021958	Pinx1	72400	PIN2/TERF1 interacting, telomerase inhibitor 1 [Source:MGI Symbol;Acc:MGI:1919650]	55.5666	1.52137	0.518096	2.93647	0.00331969	0.0163231	97.3371	28.7094	121.302	28.4238	30.2897	27.3379	82.4495	28.6838
2577	ENSMUSG00000022003	Slc25a30	67554	solute carrier family 25, member 30 [Source:MGI Symbol;Acc:MGI:1914804]	679.177	1.43762	0.362789	3.96269	7.411e-05	0.000726287	1340.66	514.376	1121.4	403.46	288.141	407.03	992.144	366.21
2579	ENSMUSG00000022009	Nufip1	27275	nuclear fragile X mental retardation protein interacting protein 1 [Source:MGI Symbol;Acc:MGI:1351474]	221.116	1.55887	0.445667	3.49785	0.000469032	0.00333736	365.987	130.388	494.241	119.222	87.7625	129.095	330.206	112.027
2584	ENSMUSG00000022018	Rgcc	66214	regulator of cell cycle [Source:MGI Symbol;Acc:MGI:1913464]	7.62457	6.74423	1.4963	4.50727	6.56673e-06	9.28676e-05	12.9783	26.3169	6.45224	0	0	0	15.2491	0
2592	ENSMUSG00000022026	Olfm4	380924	olfactomedin 4 [Source:MGI Symbol;Acc:MGI:2685142]	6.37398	4.56882	1.43113	3.19246	0.00141065	0.0082575	23.3609	10.766	2.58089	0	0.77666	0.759385	12.2359	0.512015
2597	ENSMUSG00000022037	Clu	12759	clusterin [Source:MGI Symbol;Acc:MGI:88423]	18273.2	1.14267	0.187173	6.10489	1.02871e-09	3.98667e-08	27756.6	22562	25143.1	10429.9	11555.9	12191.9	25153.9	11392.6
2603	ENSMUSG00000022052	Ppp2r2a	71978	protein phosphatase 2, regulatory subunit B, alpha [Source:MGI Symbol;Acc:MGI:1919228]	519.216	1.58335	0.38442	4.1188	3.80853e-05	0.00041615	973.371	379.203	983.321	292.923	294.354	192.124	778.632	259.8
2607	ENSMUSG00000022074	Tnfrsf10b	21933	tumor necrosis factor receptor superfamily, member 10b [Source:MGI Symbol;Acc:MGI:1341090]	15.6173	2.00679	0.7387	2.71665	0.0065947	0.0281051	38.9348	16.7471	19.3567	4.73729	11.6499	2.27816	25.0129	6.22178
2615	ENSMUSG00000022096	Hr	15460	hairless [Source:MGI Symbol;Acc:MGI:96223]	7.00107	3.30715	1.13238	2.92054	0.00349424	0.0169947	22.0631	8.37356	7.74268	0.789549	0	3.03754	12.7264	1.2757
2629	ENSMUSG00000022122	Ednrb	13618	endothelin receptor type B [Source:MGI Symbol;Acc:MGI:102720]	300.514	1.34808	0.430376	3.13234	0.0017342	0.00980035	709.912	260.777	323.902	236.075	161.545	110.87	431.53	169.497
2639	ENSMUSG00000022146	Osmr	18414	oncostatin M receptor [Source:MGI Symbol;Acc:MGI:1330819]	166.751	1.01858	0.371102	2.74476	0.00605558	0.0262013	324.457	167.471	178.082	92.3772	87.7625	150.358	223.337	110.166
2657	ENSMUSG00000022193	Psmb5	19173	proteasome (prosome, macropain) subunit, beta type 5 [Source:MGI Symbol;Acc:MGI:1194513]	484.522	1.00138	0.223692	4.47662	7.58333e-06	0.000105061	574.938	592.131	771.687	319.767	345.614	302.995	646.252	322.792
2664	ENSMUSG00000022204	Ngdn	68966	neuroguidin, EIF4E binding protein [Source:MGI Symbol;Acc:MGI:1916216]	371.651	1.13147	0.227744	4.96816	6.75927e-07	1.28847e-05	567.151	424.659	539.407	235.286	212.805	250.597	510.406	232.896
2665	ENSMUSG00000022205	Sub1	20024	SUB1 homolog (S. cerevisiae) [Source:MGI Symbol;Acc:MGI:104811]	731.923	1.07704	0.224907	4.78881	1.67769e-06	2.87728e-05	1134.3	788.311	1056.88	495.047	462.889	454.112	993.163	470.683
2669	ENSMUSG00000022215	Fitm1	68680	fat storage-inducing transmembrane protein 1 [Source:MGI Symbol;Acc:MGI:1915930]	39.3036	1.22202	0.46324	2.63799	0.00833999	0.0338716	37.637	53.83	73.5555	27.6342	28.7364	14.4283	55.0075	23.5996
2675	ENSMUSG00000022221	Ripk3	56532	receptor-interacting serine-threonine kinase 3 [Source:MGI Symbol;Acc:MGI:2154952]	14.0825	2.43856	0.639861	3.81107	0.000138366	0.00121092	20.7652	29.9056	20.6472	4.73729	3.8833	4.55631	23.7727	4.3923
2682	ENSMUSG00000022237	Ankrd33b	67434	ankyrin repeat domain 33B [Source:MGI Symbol;Acc:MGI:1917904]	788.631	1.56617	0.318455	4.91802	8.74247e-07	1.61845e-05	1576.86	898.364	1062.04	537.683	306.004	350.836	1179.09	398.174
2694	ENSMUSG00000022270	Retreg1	66270	reticulophagy regulator 1 [Source:MGI Symbol;Acc:MGI:1913520]	8200.58	3.27248	0.203069	16.1151	1.99747e-58	2.83191e-55	14322.8	15383.4	14882.7	1800.17	1297.8	1516.49	14863	1538.15
2701	ENSMUSG00000022297	Fzd6	14368	frizzled class receptor 6 [Source:MGI Symbol;Acc:MGI:108474]	102.612	1.20847	0.374483	3.22705	0.00125073	0.00748988	129.783	89.7167	210.343	55.2684	66.0161	64.5477	143.281	61.9441
2723	ENSMUSG00000022346	Myc	17869	myelocytomatosis oncogene [Source:MGI Symbol;Acc:MGI:97250]	1906.9	4.34344	0.435796	9.96668	2.13228e-23	5.581e-21	6273.7	2435.51	2195.05	239.233	113.392	184.531	3634.75	179.052
2766	ENSMUSG00000022433	Csnk1e	27373	casein kinase 1, epsilon [Source:MGI Symbol;Acc:MGI:1351660]	229.092	1.30675	0.274541	4.75978	1.93804e-06	3.25488e-05	390.646	246.422	341.969	126.328	118.829	150.358	326.346	131.838
2773	ENSMUSG00000022443	Myh9	17886	myosin, heavy polypeptide 9, non-muscle [Source:MGI Symbol;Acc:MGI:107717]	4045.99	1.6126	0.414651	3.88906	0.000100635	0.000937074	10611	3103	4579.8	1638.31	2291.15	2052.62	6097.95	1994.03
2795	ENSMUSG00000022500	Litaf	56722	LPS-induced TN factor [Source:MGI Symbol;Acc:MGI:1929512]	2612.95	1.93905	0.417316	4.64648	3.37653e-06	5.17057e-05	6385.31	2112.53	3937.15	697.172	1027.52	1518.01	4145	1080.9
2809	ENSMUSG00000022528	Hes1	15205	hes family bHLH transcription factor 1 [Source:MGI Symbol;Acc:MGI:104853]	77.9886	1.7185	0.377123	4.55686	5.19247e-06	7.5893e-05	133.676	105.268	120.012	21.3178	48.9296	38.7286	119.652	36.3253
2835	ENSMUSG00000022565	Plec	18810	plectin [Source:MGI Symbol;Acc:MGI:1277961]	1753.51	1.31496	0.428366	3.06972	0.00214261	0.0115712	3932.42	945.016	2627.35	1042.99	1041.5	931.766	2501.6	1005.42
2862	ENSMUSG00000022651	Retnlg	245195	resistin like gamma [Source:MGI Symbol;Acc:MGI:2667763]	30.3198	4.22589	0.895837	4.71726	2.39045e-06	3.86218e-05	121.996	27.5131	23.2281	0	3.10664	6.07508	57.579	3.06057
2874	ENSMUSG00000022676	Snai2	20583	snail family zinc finger 2 [Source:MGI Symbol;Acc:MGI:1096393]	114.084	1.16777	0.289913	4.028	5.62531e-05	0.000578617	190.781	160.294	122.592	71.0594	70.676	69.1041	157.889	70.2798
2927	ENSMUSG00000022791	Tnk2	51789	tyrosine kinase, non-receptor, 2 [Source:MGI Symbol;Acc:MGI:1858308]	315.854	1.3984	0.335066	4.1735	2.99957e-05	0.000340438	398.433	674.67	300.674	180.017	153.002	188.328	457.926	173.782
2930	ENSMUSG00000022797	Tfrc	22042	transferrin receptor [Source:MGI Symbol;Acc:MGI:98822]	1457.78	2.01867	0.422597	4.77683	1.78079e-06	3.02966e-05	3178.38	1271.59	2565.41	695.593	746.37	289.326	2338.46	577.096
2935	ENSMUSG00000022807	Osbpl11	106326	oxysterol binding protein-like 11 [Source:MGI Symbol;Acc:MGI:2146553]	431.896	1.03146	0.256684	4.01841	5.85932e-05	0.000597988	593.107	477.293	669.742	348.981	252.414	249.838	580.048	283.744
2957	ENSMUSG00000022848	Dirc2	224132	disrupted in renal carcinoma 2 (human) [Source:MGI Symbol;Acc:MGI:2387188]	662.899	1.25506	0.253495	4.95105	7.38156e-07	1.39381e-05	885.119	732.089	1185.92	418.461	351.05	404.752	934.376	391.421
2959	ENSMUSG00000022853	Ehhadh	74147	enoyl-Coenzyme A, hydratase/3-hydroxyacyl Coenzyme A dehydrogenase [Source:MGI Symbol;Acc:MGI:1277964]	7377.56	1.45109	0.458356	3.16585	0.00154631	0.00888765	5832.44	6610.33	19968.4	5427.36	3387.79	3039.06	10803.7	3951.4
2962	ENSMUSG00000022858	Tra2b	20462	transformer 2 beta [Source:MGI Symbol;Acc:MGI:106016]	1632.14	2.20749	0.389895	5.66175	1.49839e-08	4.5279e-07	3328.93	1138.8	3582.28	563.738	602.688	576.373	2683.34	580.933
2963	ENSMUSG00000022863	Btg3	12228	B cell translocation gene 3 [Source:MGI Symbol;Acc:MGI:109532]	414.503	3.69001	0.906402	4.07105	4.68016e-05	0.000496097	1445.78	519.161	343.259	60.0057	15.5332	103.276	769.4	59.6051
2964	ENSMUSG00000022864	D16Ertd472e	67102	DNA segment, Chr 16, ERATO Doi 472, expressed [Source:MGI Symbol;Acc:MGI:1196400]	728.406	1.86993	0.393344	4.75393	1.995e-06	3.33409e-05	1523.65	547.87	1360.13	415.303	250.861	272.619	1143.88	312.928
2965	ENSMUSG00000022865	Cxadr	13052	coxsackie virus and adenovirus receptor [Source:MGI Symbol;Acc:MGI:1201679]	3424.73	2.11997	0.224745	9.4328	3.99297e-21	7.99204e-19	6507.31	5886.61	4311.38	1287.75	1229.45	1325.89	5568.44	1281.03
2974	ENSMUSG00000022884	Eif4a2	13682	eukaryotic translation initiation factor 4A2 [Source:MGI Symbol;Acc:MGI:106906]	5891	1.40756	0.273855	5.1398	2.75031e-07	5.87826e-06	11633.7	6339.98	7696.23	3366.64	2853.45	3455.96	8556.65	3225.35
2980	ENSMUSG00000022893	Adamts1	11504	a disintegrin-like and metallopeptidase (reprolysin type) with thrombospondin type 1 motif, 1 [Source:MGI Symbol;Acc:MGI:109249]	657.863	3.65936	0.406123	9.01047	2.05178e-19	3.45613e-17	1974	593.327	1090.43	82.1131	102.519	104.795	1219.25	96.4758
2982	ENSMUSG00000022895	Ets2	23872	E26 avian leukemia oncogene 2, 3' domain [Source:MGI Symbol;Acc:MGI:95456]	3230.73	4.6161	0.376297	12.2672	1.35936e-34	7.70891e-32	9141.9	2922.37	6560.63	258.972	240.765	259.71	6208.3	253.149
2985	ENSMUSG00000022899	Slc15a2	57738	solute carrier family 15 (H+/peptide transporter), member 2 [Source:MGI Symbol;Acc:MGI:1890457]	39.2015	6.23062	1.19811	5.20036	1.98908e-07	4.40627e-06	1.29783	149.528	81.2982	0.789549	0.77666	1.51877	77.3746	1.02833
2999	ENSMUSG00000022951	Rcan1	54720	regulator of calcineurin 1 [Source:MGI Symbol;Acc:MGI:1890564]	1682.19	4.26362	0.433618	9.83267	8.14283e-23	2.00774e-20	4281.53	1154.36	4157.82	162.647	188.728	148.08	3197.9	166.485
3000	ENSMUSG00000022952	Runx1	12394	runt related transcription factor 1 [Source:MGI Symbol;Acc:MGI:99852]	30.2727	2.56512	0.731265	3.50778	0.000451855	0.00323	107.72	16.7471	30.9707	6.31639	6.21328	13.6689	51.8125	8.73287
3034	ENSMUSG00000023025	Larp4	207214	La ribonucleoprotein domain family, member 4 [Source:MGI Symbol;Acc:MGI:2443114]	2889.65	1.4838	0.303395	4.89066	1.00497e-06	1.82862e-05	5186.12	2716.62	4868.86	1830.96	1504.39	1230.96	4257.2	1522.11
3038	ENSMUSG00000023031	Cela1	109901	chymotrypsin-like elastase family, member 1 [Source:MGI Symbol;Acc:MGI:95314]	212.65	1.19381	0.298211	4.00324	6.24802e-05	0.000630846	277.735	266.758	343.259	172.911	117.276	97.9607	295.917	129.383
3041	ENSMUSG00000023034	Nr4a1	15370	nuclear receptor subfamily 4, group A, member 1 [Source:MGI Symbol;Acc:MGI:1352454]	123.922	2.53072	0.71896	3.51997	0.000431596	0.00310475	315.372	250.011	68.3937	83.6922	10.8732	15.1877	211.259	36.5844
3043	ENSMUSG00000023043	Krt18	16668	keratin 18 [Source:MGI Symbol;Acc:MGI:96692]	10257.1	3.22312	0.314338	10.2537	1.13951e-24	3.52482e-22	25268.7	13444.4	16876.5	1508.04	1850	2594.82	18529.8	1984.29
3046	ENSMUSG00000023046	Igfbp6	16012	insulin-like growth factor binding protein 6 [Source:MGI Symbol;Acc:MGI:96441]	30.7115	2.53304	0.464831	5.44937	5.05479e-08	1.31494e-06	59.7001	40.6716	56.7797	8.68504	9.31992	9.11262	52.3838	9.03919
3053	ENSMUSG00000023067	Cdkn1a	12575	cyclin-dependent kinase inhibitor 1A (P21) [Source:MGI Symbol;Acc:MGI:104556]	2018.67	5.65822	0.407788	13.8754	8.93067e-44	7.23512e-41	4715.01	2998.93	4162.98	69.4803	36.503	129.095	3958.97	78.3596
3058	ENSMUSG00000023074	Mospd1	70380	motile sperm domain containing 1 [Source:MGI Symbol;Acc:MGI:1917630]	284.69	1.10265	0.29409	3.74937	0.000177282	0.00147985	504.855	278.72	381.972	211.599	166.205	164.787	388.516	180.864
3060	ENSMUSG00000023079	Gtf2ird1	57080	general transcription factor II I repeat domain-containing 1 [Source:MGI Symbol;Acc:MGI:1861942]	344.654	1.16935	0.352794	3.31453	0.000917968	0.00581653	729.379	308.626	393.586	234.496	176.302	225.537	477.197	212.112
3071	ENSMUSG00000023132	Gzma	14938	granzyme A [Source:MGI Symbol;Acc:MGI:109266]	13.7967	3.28397	1.19613	2.74549	0.00604203	0.026156	9.0848	63.3998	2.58089	3.1582	0	4.55631	25.0218	2.5715
3095	ENSMUSG00000023286	Ube2j2	140499	ubiquitin-conjugating enzyme E2J 2 [Source:MGI Symbol;Acc:MGI:2153608]	479.25	1.2783	0.343708	3.71915	0.000199898	0.0016241	988.945	383.988	663.29	273.184	288.917	277.176	678.741	279.759
3099	ENSMUSG00000023341	Mx2	17858	MX dynamin-like GTPase 2 [Source:MGI Symbol;Acc:MGI:97244]	157.566	1.58093	0.536771	2.94526	0.00322684	0.0159634	347.818	302.644	58.0701	65.5326	89.3159	82.0136	236.177	78.954
3112	ENSMUSG00000023571	C1qtnf12	67389	C1q and tumor necrosis factor related 12 [Source:MGI Symbol;Acc:MGI:1914639]	17.7108	2.16024	0.683066	3.16256	0.00156387	0.00897035	25.9566	13.1585	47.7466	5.52684	9.31992	4.55631	28.9539	6.46769
3131	ENSMUSG00000023852	Chd1	12648	chromodomain helicase DNA binding protein 1 [Source:MGI Symbol;Acc:MGI:88393]	1592.83	1.92643	0.327535	5.88159	4.06335e-09	1.41659e-07	3245.87	1521.6	2798.98	826.658	636.861	527.013	2522.15	663.511
3137	ENSMUSG00000023886	Smoc2	64074	SPARC related modular calcium binding 2 [Source:MGI Symbol;Acc:MGI:1929881]	51.7104	1.10367	0.379246	2.91018	0.0036122	0.0174065	96.0393	53.83	61.9415	33.1611	33.3964	31.8942	70.6036	32.8172
3140	ENSMUSG00000023905	Tnfrsf12a	27279	tumor necrosis factor receptor superfamily, member 12a [Source:MGI Symbol;Acc:MGI:1351484]	475.43	4.31137	0.45343	9.50834	1.93729e-21	3.9237e-19	1301.72	380.399	1033.65	47.3729	60.5795	28.8566	905.256	45.603
3148	ENSMUSG00000023927	Satb1	20230	special AT-rich sequence binding protein 1 [Source:MGI Symbol;Acc:MGI:105084]	19.3415	1.99132	0.684545	2.90898	0.00362615	0.0174616	18.1696	53.83	20.6472	12.6328	6.21328	4.55631	30.8823	7.80079
3182	ENSMUSG00000024014	Pim1	18712	proviral integration site 1 [Source:MGI Symbol;Acc:MGI:97584]	773.934	3.00145	0.463815	6.47123	9.72103e-11	4.61966e-09	2369.83	1169.91	588.444	121.591	157.662	236.169	1376.06	171.807
3192	ENSMUSG00000024039	Cbs	12411	cystathionine beta-synthase [Source:MGI Symbol;Acc:MGI:88285]	2951.69	1.10613	0.211111	5.23956	1.60964e-07	3.69068e-06	4686.46	4075.53	3330.64	1778.85	2011.55	1827.08	4030.88	1872.49
3193	ENSMUSG00000024042	Sik1	17691	salt inducible kinase 1 [Source:MGI Symbol;Acc:MGI:104754]	829.019	1.26012	0.478118	2.63558	0.00839949	0.034032	2038.89	748.836	721.36	763.494	267.171	434.368	1169.69	488.344
3197	ENSMUSG00000024048	Myl12a	67268	myosin, light chain 12A, regulatory, non-sarcomeric [Source:MGI Symbol;Acc:MGI:1914518]	880.762	3.28404	0.343841	9.55102	1.28424e-21	2.63239e-19	2425.64	1405.56	961.383	161.858	161.545	168.584	1597.53	163.995
3198	ENSMUSG00000024049	Myom1	17929	myomesin 1 [Source:MGI Symbol;Acc:MGI:1341430]	46.5219	2.0708	0.56933	3.63725	0.000275562	0.00213194	79.1675	26.3169	120.012	19.7387	21.7465	12.1502	75.1653	17.8785
3200	ENSMUSG00000024052	Lpin2	64898	lipin 2 [Source:MGI Symbol;Acc:MGI:1891341]	19166.5	1.92184	0.219172	8.76861	1.8088e-18	2.59546e-16	31461.9	30723.8	28800.2	9903.31	6807.42	7302.25	30328.6	8004.33
3201	ENSMUSG00000024053	Emilin2	246707	elastin microfibril interfacer 2 [Source:MGI Symbol;Acc:MGI:2389136]	137.011	2.62304	0.559542	4.68784	2.76102e-06	4.36961e-05	121.996	122.015	463.271	50.5311	20.9698	43.285	235.76	38.262
3223	ENSMUSG00000024087	Cyp1b1	13078	cytochrome P450, family 1, subfamily b, polypeptide 1 [Source:MGI Symbol;Acc:MGI:88590]	16.0013	1.83787	0.644662	2.85091	0.00435945	0.0201378	38.9348	16.7471	19.3567	9.47459	4.65996	6.83447	25.0129	6.98967
3227	ENSMUSG00000024097	Srsf7	225027	serine/arginine-rich splicing factor 7 [Source:MGI Symbol;Acc:MGI:1926232]	742.585	1.50174	0.417648	3.59572	0.000323498	0.00243957	1318.59	427.052	1547.25	361.613	368.913	432.09	1097.63	387.539
3235	ENSMUSG00000024121	Atp6v0c	11984	ATPase, H+ transporting, lysosomal V0 subunit C [Source:MGI Symbol;Acc:MGI:88116]	336.368	1.33479	0.261441	5.1055	3.29916e-07	6.87009e-06	536.003	364.848	544.569	184.754	170.088	217.944	481.807	190.929
3243	ENSMUSG00000024140	Epas1	13819	endothelial PAS domain protein 1 [Source:MGI Symbol;Acc:MGI:109169]	7867.69	1.87763	0.300609	6.24608	4.20872e-10	1.79456e-08	15771.2	7806.55	13530.3	2771.32	3524.48	3802.24	12369.4	3366.01
3266	ENSMUSG00000024190	Dusp1	19252	dual specificity phosphatase 1 [Source:MGI Symbol;Acc:MGI:105120]	1704.04	3.42609	0.467056	7.3355	2.20888e-13	1.6339e-11	4920.07	1721.37	2712.52	459.518	271.831	138.967	3117.98	290.105
3287	ENSMUSG00000024235	Map3k8	26410	mitogen-activated protein kinase kinase kinase 8 [Source:MGI Symbol;Acc:MGI:1346878]	78.8511	2.37594	0.429303	5.53442	3.12259e-08	8.63815e-07	172.611	102.875	121.302	12.6328	29.5131	34.1723	132.263	25.4394
3299	ENSMUSG00000024258	Polr2d	69241	polymerase (RNA) II (DNA directed) polypeptide D [Source:MGI Symbol;Acc:MGI:1916491]	47.6553	1.24972	0.371556	3.36348	0.000769659	0.00502464	66.1892	53.83	81.2982	32.3715	27.1831	25.0597	67.1058	28.2048
3310	ENSMUSG00000024286	Ccny	67974	cyclin Y [Source:MGI Symbol;Acc:MGI:1915224]	1688.29	1.45184	0.311522	4.66047	3.15489e-06	4.87884e-05	3471.69	1552.7	2393.78	941.143	970.048	800.392	2472.72	903.861
3311	ENSMUSG00000024287	Thoc1	225160	THO complex 1 [Source:MGI Symbol;Acc:MGI:1919668]	427.78	1.02086	0.30012	3.4015	0.000670179	0.00449241	765.718	374.418	579.411	269.236	273.384	304.513	573.182	282.378
3329	ENSMUSG00000024335	Brd2	14312	bromodomain containing 2 [Source:MGI Symbol;Acc:MGI:99495]	2890.09	2.38827	0.541679	4.40902	1.03838e-05	0.000137158	4670.88	1081.39	8807.3	954.565	994.124	832.286	4853.19	926.992
3340	ENSMUSG00000024360	Etf1	225363	eukaryotic translation termination factor 1 [Source:MGI Symbol;Acc:MGI:2385071]	2626.95	1.10778	0.303687	3.64779	0.000264509	0.00206331	4664.39	2186.7	3915.22	1847.54	1648.07	1499.79	3588.77	1665.13
3367	ENSMUSG00000024423	Impact	16210	impact, RWD domain protein [Source:MGI Symbol;Acc:MGI:1098233]	1127.07	3.05219	0.311257	9.80603	1.06059e-22	2.54137e-20	2092.1	1271.59	2671.23	279.5	204.262	243.763	2011.64	242.508
3392	ENSMUSG00000024486	Hbegf	15200	heparin-binding EGF-like growth factor [Source:MGI Symbol;Acc:MGI:96070]	41.2446	3.11987	0.593317	5.25834	1.45359e-07	3.3784e-06	131.081	41.8678	49.037	7.89549	5.43662	12.1502	73.9951	8.49409
3396	ENSMUSG00000024498	Tcerg1	56070	transcription elongation regulator 1 (CA150) [Source:MGI Symbol;Acc:MGI:1926421]	396.957	1.13475	0.402206	2.82132	0.00478262	0.0216458	743.655	229.675	663.29	249.498	261.734	233.891	545.54	248.374
3415	ENSMUSG00000024539	Ptpn2	19255	protein tyrosine phosphatase, non-receptor type 2 [Source:MGI Symbol;Acc:MGI:97806]	380.737	1.60195	0.397939	4.02562	5.68249e-05	0.000583089	935.734	302.644	480.046	211.599	194.165	160.23	572.808	188.665
3430	ENSMUSG00000024581	Napg	108123	N-ethylmaleimide sensitive fusion protein attachment protein gamma [Source:MGI Symbol;Acc:MGI:104561]	458.384	1.00286	0.265626	3.77544	0.000159723	0.00135529	715.103	429.444	690.389	317.399	288.141	309.829	611.646	305.123
3431	ENSMUSG00000024583	Txnl1	53382	thioredoxin-like 1 [Source:MGI Symbol;Acc:MGI:1860078]	1675.31	1.04065	0.267672	3.88777	0.000101171	0.000940048	2507.4	1529.97	2726.72	1037.47	1068.68	1181.6	2254.7	1095.92
3434	ENSMUSG00000024589	Nedd4l	83814	neural precursor cell expressed, developmentally down-regulated gene 4-like [Source:MGI Symbol;Acc:MGI:1933754]	1789.11	2.65859	0.313013	8.49355	2.00421e-17	2.5446e-15	4624.16	2278.81	2364.1	472.15	507.159	488.285	3089.02	489.198
3442	ENSMUSG00000024608	Rps14	20044	ribosomal protein S14 [Source:MGI Symbol;Acc:MGI:98107]	2773.72	1.01559	0.190118	5.3419	9.19789e-08	2.23229e-06	3915.55	3186.74	4032.65	1789.91	1889.61	1827.84	3711.64	1835.79
3446	ENSMUSG00000024620	Pdgfrb	18596	platelet derived growth factor receptor, beta polypeptide [Source:MGI Symbol;Acc:MGI:97531]	83.3283	1.1388	0.336926	3.37996	0.00072496	0.00478795	121.996	132.781	89.0409	38.6879	57.4728	59.9914	114.606	52.0507
3456	ENSMUSG00000024659	Anxa1	16952	annexin A1 [Source:MGI Symbol;Acc:MGI:96819]	110.42	1.74454	0.433678	4.02265	5.75458e-05	0.000589775	277.735	111.249	121.302	66.3221	38.833	47.0819	170.095	50.7457
3458	ENSMUSG00000024661	Fth1	14319	ferritin heavy polypeptide 1 [Source:MGI Symbol;Acc:MGI:95588]	27419.8	1.99983	0.322461	6.20178	5.58296e-10	2.28324e-08	59221.2	24418.5	47972.4	10958.9	10615.4	11332.3	43870.7	10968.9
3460	ENSMUSG00000024664	Fads3	60527	fatty acid desaturase 3 [Source:MGI Symbol;Acc:MGI:1928740]	403.919	2.92097	0.976707	2.99063	0.00278402	0.0142108	293.309	234.46	1613.06	150.014	92.4225	40.2474	713.609	94.2281
3468	ENSMUSG00000024678	Ms4a4d	66607	membrane-spanning 4-domains, subfamily A, member 4D [Source:MGI Symbol;Acc:MGI:1913857]	30.2899	1.6418	0.526254	3.11979	0.00180982	0.0101218	70.0827	43.064	24.5185	13.4223	12.4266	18.2252	45.8884	14.6914
3483	ENSMUSG00000024732	Ccdc86	108673	coiled-coil domain containing 86 [Source:MGI Symbol;Acc:MGI:1277220]	266.584	1.92924	0.408904	4.71807	2.38093e-06	3.85412e-05	463.325	184.218	619.415	112.116	111.839	108.592	422.319	110.849
3490	ENSMUSG00000024750	Zfand5	22682	zinc finger, AN1-type domain 5 [Source:MGI Symbol;Acc:MGI:1278334]	3948.6	3.22562	0.358595	8.99517	2.35875e-19	3.93426e-17	11650.6	4902.12	4850.79	799.813	779.766	708.506	7134.51	762.695
3499	ENSMUSG00000024773	Atg2a	329015	autophagy related 2A [Source:MGI Symbol;Acc:MGI:1916291]	1512.71	1.37726	0.252409	5.45648	4.85679e-08	1.26537e-06	2668.33	1707.01	2178.28	977.462	710.644	834.564	2184.54	840.89
3500	ENSMUSG00000024776	Stambpl1	76630	STAM binding protein like 1 [Source:MGI Symbol;Acc:MGI:1923880]	13.2358	2.42922	0.705011	3.44565	0.000569689	0.00392871	14.2761	19.1396	33.5516	5.52684	3.8833	3.03754	22.3224	4.14923
3506	ENSMUSG00000024785	Rcl1	59028	RNA terminal phosphate cyclase-like 1 [Source:MGI Symbol;Acc:MGI:1913275]	3188.47	1.92464	0.22586	8.5214	1.57637e-17	2.09521e-15	4721.5	4187.98	6232.86	1423.56	1320.32	1244.63	5047.45	1329.5
3519	ENSMUSG00000024812	Tjp2	21873	tight junction protein 2 [Source:MGI Symbol;Acc:MGI:1341872]	320.878	1.08191	0.40771	2.65364	0.00796289	0.0327149	750.145	277.524	280.027	194.229	187.175	236.169	435.898	205.858
3532	ENSMUSG00000024843	Chka	12660	choline kinase alpha [Source:MGI Symbol;Acc:MGI:107760]	11508.2	6.62491	0.402088	16.4763	5.43452e-61	1.15572e-57	39084.1	16876.3	12396	245.55	194.165	252.875	22785.5	230.863
3552	ENSMUSG00000024889	Rce1	19671	Ras converting CAAX endopeptidase 1 [Source:MGI Symbol;Acc:MGI:1336895]	188.766	1.48522	0.388243	3.82549	0.000130511	0.00116251	438.666	166.275	229.7	81.3236	111.839	104.795	278.213	99.3192
3566	ENSMUSG00000024913	Lrp5	16973	low density lipoprotein receptor-related protein 5 [Source:MGI Symbol;Acc:MGI:1278315]	803.609	1.13931	0.259105	4.3971	1.09705e-05	0.000144235	1177.13	1318.24	820.724	519.523	425.61	560.426	1105.36	501.853
3572	ENSMUSG00000024927	Rela	19697	v-rel reticuloendotheliosis viral oncogene homolog A (avian) [Source:MGI Symbol;Acc:MGI:103290]	726.669	1.12838	0.311728	3.61976	0.000294877	0.00226183	1206.98	588.542	1196.24	469.782	414.736	483.728	997.255	456.082
3574	ENSMUSG00000024940	Ltbp3	16998	latent transforming growth factor beta binding protein 3 [Source:MGI Symbol;Acc:MGI:1101355]	38.2823	1.10416	0.393928	2.80296	0.00506355	0.022682	48.0196	44.2603	64.5224	26.8447	21.7465	24.3003	52.2674	24.2972
3581	ENSMUSG00000024949	Sf1	22668	splicing factor 1 [Source:MGI Symbol;Acc:MGI:1095403]	1880.04	1.12472	0.245131	4.58823	4.47029e-06	6.6306e-05	2952.56	1881.66	2899.64	1239.59	1083.44	1223.37	2577.95	1182.13
3593	ENSMUSG00000024970	Spindoc	68229	spindlin interactor and repressor of chromatin binding [Source:MGI Symbol;Acc:MGI:2147611]	44.5033	1.57071	0.474744	3.30855	0.000937805	0.00591579	67.4871	39.4754	92.9122	14.2119	24.0765	28.8566	66.6249	22.3817
3598	ENSMUSG00000024981	Acsl5	433256	acyl-CoA synthetase long-chain family member 5 [Source:MGI Symbol;Acc:MGI:1919129]	4226.02	1.07029	0.205025	5.22027	1.78664e-07	4.01534e-06	6128.34	5335.16	5712.81	3065.03	2848.79	2266.01	5725.44	2726.61
3620	ENSMUSG00000025017	Pik3ap1	83490	phosphoinositide-3-kinase adaptor protein 1 [Source:MGI Symbol;Acc:MGI:1933177]	2510.43	1.56908	0.307363	5.10498	3.30833e-07	6.88077e-06	3691.02	3033.62	4541.08	1784.38	1097.42	915.059	3755.24	1265.62
3622	ENSMUSG00000025024	Smndc1	76479	survival motor neuron domain containing 1 [Source:MGI Symbol;Acc:MGI:1923729]	330.574	1.32397	0.310681	4.26151	2.03049e-05	0.000244824	581.427	296.663	539.407	163.437	206.591	195.921	472.499	188.65
3631	ENSMUSG00000025041	Nt5c2	76952	5'-nucleotidase, cytosolic II [Source:MGI Symbol;Acc:MGI:2178563]	480.608	1.16111	0.263311	4.40967	1.03528e-05	0.000136855	834.503	482.078	676.194	308.714	294.354	287.807	664.259	296.958
3659	ENSMUSG00000025134	Alyref	21681	Aly/REF export factor [Source:MGI Symbol;Acc:MGI:1341044]	195.939	1.07267	0.289628	3.70362	0.000212547	0.00171458	289.416	191.396	316.16	108.958	142.129	127.577	265.657	126.221
3684	ENSMUSG00000025178	Pi4k2a	84095	phosphatidylinositol 4-kinase type 2 alpha [Source:MGI Symbol;Acc:MGI:1934031]	1046.33	1.84569	0.284574	6.48579	8.82697e-11	4.2542e-09	2147.91	1135.22	1628.54	402.67	443.473	520.179	1637.22	455.441
3689	ENSMUSG00000025190	Got1	14718	glutamic-oxaloacetic transaminase 1, soluble [Source:MGI Symbol;Acc:MGI:95791]	6270.95	2.96034	0.326079	9.07861	1.09968e-19	1.92875e-17	8307.4	11473	13561.3	2082.83	1079.56	1121.61	11113.9	1428
3693	ENSMUSG00000025195	Dnmbp	71972	dynamin binding protein [Source:MGI Symbol;Acc:MGI:1917352]	1643.32	1.50583	0.232693	6.47133	9.71441e-11	4.61966e-09	2499.62	2147.22	2645.42	929.299	665.597	972.772	2430.75	855.89
3715	ENSMUSG00000025229	Pitx3	18742	paired-like homeodomain transcription factor 3 [Source:MGI Symbol;Acc:MGI:1100498]	6.54665	3.54712	1.0828	3.27589	0.0010533	0.00652425	12.9783	16.7471	6.45224	0.789549	1.55332	0.759385	12.0592	1.03408
3719	ENSMUSG00000025235	Bbs4	102774	Bardet-Biedl syndrome 4 (human) [Source:MGI Symbol;Acc:MGI:2143311]	103.403	1.45139	0.42867	3.3858	0.000709703	0.00471279	206.355	77.7545	170.339	38.6879	55.1428	72.1416	151.483	55.3241
3744	ENSMUSG00000025283	Sat1	20229	spermidine/spermine N1-acetyl transferase 1 [Source:MGI Symbol;Acc:MGI:98233]	8949.58	4.28335	0.376371	11.3807	5.22048e-30	2.40043e-27	28743	10594.9	11736.6	873.241	855.879	893.796	17024.9	874.306
3747	ENSMUSG00000025290	Rps24	20088	ribosomal protein S24 [Source:MGI Symbol;Acc:MGI:98147]	3048.78	1.16096	0.255815	4.53828	5.67137e-06	8.17687e-05	4547.59	3457.09	4635.29	2056.78	2196.39	1399.55	4213.32	1884.24
3757	ENSMUSG00000025337	Sbds	66711	SBDS ribosome maturation factor [Source:MGI Symbol;Acc:MGI:1913961]	883.453	1.19058	0.336753	3.53547	0.000407046	0.0029569	1354.93	665.1	1665.97	567.686	539.002	508.029	1228.67	538.239
3758	ENSMUSG00000025340	Rabgef1	56715	RAB guanine nucleotide exchange factor (GEF) 1 [Source:MGI Symbol;Acc:MGI:1929459]	508.789	2.03146	0.352637	5.76079	8.37235e-09	2.70796e-07	1122.62	478.489	851.695	258.183	171.642	170.102	817.602	199.976
3762	ENSMUSG00000025351	Cd63	12512	CD63 antigen [Source:MGI Symbol;Acc:MGI:99529]	114.191	1.96495	0.475423	4.13307	3.57955e-05	0.000395962	284.224	106.464	154.854	22.8969	57.4728	59.232	181.847	46.5339
3789	ENSMUSG00000025408	Ddit3	13198	DNA-damage inducible transcript 3 [Source:MGI Symbol;Acc:MGI:109247]	426.73	3.77603	0.56498	6.68348	2.33336e-11	1.24834e-09	909.777	161.49	1314.97	48.952	63.6861	61.5102	795.411	58.0494
3802	ENSMUSG00000025450	Gm9752		predicted gene 9752 [Source:MGI Symbol;Acc:MGI:3641896]	42.7835	1.19256	0.407042	2.92982	0.00339155	0.0166044	41.5305	62.2036	74.8459	23.6865	23.2998	31.1348	59.5267	26.0404
3809	ENSMUSG00000025473	Adam8	11501	a disintegrin and metallopeptidase domain 8 [Source:MGI Symbol;Acc:MGI:107825]	20.0653	3.02671	0.890962	3.39713	0.000680978	0.00454867	80.4653	20.3358	6.45224	2.36865	6.21328	4.55631	35.7511	4.37941
3818	ENSMUSG00000025491	Ifitm1	68713	interferon induced transmembrane protein 1 [Source:MGI Symbol;Acc:MGI:1915963]	82.195	1.92902	0.438831	4.39582	1.10358e-05	0.000144982	173.909	114.837	101.945	16.5805	38.0563	47.8413	130.231	34.1594
3830	ENSMUSG00000025508	Rplp2	67186	ribosomal protein, large P2 [Source:MGI Symbol;Acc:MGI:1914436]	724.64	1.07042	0.219617	4.87404	1.09336e-06	1.97257e-05	1035.67	802.666	1107.2	431.883	474.539	495.879	981.845	467.434
3831	ENSMUSG00000025509	Pnpla2	66853	patatin-like phospholipase domain containing 2 [Source:MGI Symbol;Acc:MGI:1914103]	2127.61	2.04665	0.272501	7.51063	5.8845e-14	4.59234e-12	2869.5	2735.76	4672.71	933.247	785.203	769.257	3425.99	829.236
3860	ENSMUSG00000025591	Tma16	66282	translation machinery associated 16 [Source:MGI Symbol;Acc:MGI:1913532]	209.717	2.14023	0.442826	4.83312	1.34412e-06	2.36478e-05	411.411	130.388	483.918	83.6922	70.676	78.2167	341.906	77.5283
3864	ENSMUSG00000025608	Podxl	27205	podocalyxin-like [Source:MGI Symbol;Acc:MGI:1351317]	162.341	1.51441	0.290258	5.21747	1.81386e-07	4.06042e-06	177.802	240.441	303.255	81.3236	84.6559	86.5699	240.499	84.1831
3866	ENSMUSG00000025612	Bach1	12013	BTB and CNC homology 1, basic leucine zipper transcription factor 1 [Source:MGI Symbol;Acc:MGI:894680]	2039.01	1.80467	0.311445	5.79449	6.85302e-09	2.25078e-07	4162.13	1910.37	3439.04	1040.63	813.163	868.737	3170.51	907.508
3898	ENSMUSG00000025779	Ly96	17087	lymphocyte antigen 96 [Source:MGI Symbol;Acc:MGI:1341909]	35.1332	1.66515	0.631521	2.63673	0.00837096	0.0339641	106.422	20.3358	33.5516	20.5283	15.5332	14.4283	53.4364	16.8299
3910	ENSMUSG00000025804	Ccr1	12768	chemokine (C-C motif) receptor 1 [Source:MGI Symbol;Acc:MGI:104618]	20.1796	2.20513	0.753958	2.92474	0.00344746	0.0168153	55.8066	34.6905	9.03313	4.73729	4.65996	12.1502	33.1767	7.18247
3912	ENSMUSG00000025810	Nrp1	18186	neuropilin 1 [Source:MGI Symbol;Acc:MGI:106206]	2729.06	1.92297	0.428656	4.48603	7.25609e-06	0.00010127	6391.8	1738.11	4827.56	832.974	1147.13	1436.76	4319.16	1138.95
3984	ENSMUSG00000025995	Wdr75	73674	WD repeat domain 75 [Source:MGI Symbol;Acc:MGI:1920924]	360.735	1.19038	0.414841	2.86948	0.00411154	0.0192434	608.681	202.162	694.261	225.021	201.155	233.131	501.701	219.769
3995	ENSMUSG00000026020	Nop58	55989	NOP58 ribonucleoprotein [Source:MGI Symbol;Acc:MGI:1933184]	1206.2	2.18234	0.452067	4.82747	1.38276e-06	2.42525e-05	2652.76	636.391	2641.55	416.882	427.939	461.706	1976.9	435.509
4003	ENSMUSG00000026034	Clk1	12747	CDC-like kinase 1 [Source:MGI Symbol;Acc:MGI:107403]	2157.19	1.41544	0.249558	5.67177	1.41329e-08	4.30129e-07	4005.1	2350.58	3058.36	1223.01	1187.51	1118.57	3138.01	1176.37
4012	ENSMUSG00000026064	Ptp4a1	19243	protein tyrosine phosphatase 4a1 [Source:MGI Symbol;Acc:MGI:1277096]	594.58	2.91203	0.481001	6.05411	1.41196e-09	5.31453e-08	1637.86	1096.94	414.234	213.968	111.839	92.645	1049.68	139.484
4015	ENSMUSG00000026072	Il1r1	16177	interleukin 1 receptor, type I [Source:MGI Symbol;Acc:MGI:96545]	7664.73	2.49414	0.320358	7.78547	6.94522e-15	6.28505e-13	17322.1	11774.4	9959.67	1508.83	2553.66	2869.72	13018.7	2310.73
4016	ENSMUSG00000026073	Il1r2	16178	interleukin 1 receptor, type II [Source:MGI Symbol;Acc:MGI:96546]	31.5793	3.8358	0.850069	4.51234	6.41162e-06	9.08251e-05	140.165	22.7282	14.1949	3.94775	3.8833	4.55631	59.0295	4.12912
4017	ENSMUSG00000026074	Map4k4	26921	mitogen-activated protein kinase kinase kinase kinase 4 [Source:MGI Symbol;Acc:MGI:1349394]	200.392	1.16418	0.326151	3.56944	0.000357747	0.00265779	395.838	236.852	198.729	130.276	133.585	107.073	277.14	123.645
4018	ENSMUSG00000026077	Npas2	18143	neuronal PAS domain protein 2 [Source:MGI Symbol;Acc:MGI:109232]	10.7292	3.96603	1.01092	3.92318	8.73888e-05	0.000829731	29.85	20.3358	10.3236	0	3.10664	0.759385	20.1698	1.28867
4019	ENSMUSG00000026078	Pdcl3	68833	phosducin-like 3 [Source:MGI Symbol;Acc:MGI:1916083]	241.12	1.14272	0.230756	4.95205	7.34372e-07	1.38975e-05	333.542	375.614	286.479	155.541	142.905	152.636	331.878	150.361
4024	ENSMUSG00000026094	Stk17b	98267	serine/threonine kinase 17b (apoptosis-inducing) [Source:MGI Symbol;Acc:MGI:2138162]	230.774	1.4641	0.270827	5.40604	6.44339e-08	1.6337e-06	432.177	283.505	300.674	119.222	135.915	113.148	338.785	122.762
4039	ENSMUSG00000026121	Sema4c	20353	sema domain, immunoglobulin domain (Ig), transmembrane domain (TM) and short cytoplasmic domain, (semaphorin) 4C [Source:MGI Symbol;Acc:MGI:109252]	93.2424	2.30244	0.487383	4.72409	2.31152e-06	3.75606e-05	253.076	141.154	70.9746	28.4238	23.2998	42.5256	155.068	31.4164
4051	ENSMUSG00000026158	Ogfrl1	70155	opioid growth factor receptor-like 1 [Source:MGI Symbol;Acc:MGI:1917405]	363.093	1.18064	0.228629	5.16402	2.41707e-07	5.23175e-06	580.129	425.855	505.855	202.125	232.221	232.372	503.947	222.239
4061	ENSMUSG00000026180	Cxcr2	12765	chemokine (C-X-C motif) receptor 2 [Source:MGI Symbol;Acc:MGI:105303]	32.2238	2.52791	0.769583	3.28478	0.00102063	0.00634879	120.698	13.1585	30.9707	5.52684	9.31992	13.6689	54.9424	9.50523
4084	ENSMUSG00000026229	Psmd1	70247	proteasome (prosome, macropain) 26S subunit, non-ATPase, 1 [Source:MGI Symbol;Acc:MGI:1917497]	1689.62	1.06995	0.212713	5.03004	4.90389e-07	9.65624e-06	2608.63	1852.95	2405.39	1131.42	1098.2	1041.12	2288.99	1090.25
4135	ENSMUSG00000026358	Rgs1	50778	regulator of G-protein signaling 1 [Source:MGI Symbol;Acc:MGI:1354694]	92.7689	1.77305	0.561995	3.15493	0.00160538	0.00918062	201.163	167.471	61.9415	69.4803	16.3099	40.2474	143.525	42.0125
4136	ENSMUSG00000026360	Rgs2	19735	regulator of G-protein signaling 2 [Source:MGI Symbol;Acc:MGI:1098271]	56.4741	1.45435	0.414635	3.50754	0.00045227	0.00323161	118.102	66.9885	63.2319	22.1074	37.2797	31.1348	82.7743	30.1739
4141	ENSMUSG00000026377	Nifk	67949	nucleolar protein interacting with the FHA domain of MKI67 [Source:MGI Symbol;Acc:MGI:1915199]	743.628	1.49968	0.357329	4.19693	2.70563e-05	0.000311862	1284.85	545.478	1465.95	412.934	375.903	376.655	1098.76	388.498
4159	ENSMUSG00000026421	Csrp1	13007	cysteine and glycine-rich protein 1 [Source:MGI Symbol;Acc:MGI:88549]	166.538	1.40634	0.297782	4.72272	2.32707e-06	3.77771e-05	184.292	222.498	318.74	98.6936	83.8792	91.1262	241.843	91.233
4178	ENSMUSG00000026470	Stx6	58244	syntaxin 6 [Source:MGI Symbol;Acc:MGI:1926235]	190.589	1.41741	0.43001	3.29622	0.000979965	0.00613591	433.475	131.585	267.123	87.64	88.5392	135.171	277.394	103.783
4181	ENSMUSG00000026475	Rgs16	19734	regulator of G-protein signaling 16 [Source:MGI Symbol;Acc:MGI:108407]	3446.37	1.01218	0.296944	3.40867	0.000652804	0.00438978	3745.53	3549.19	6529.66	2269.16	1924.56	2660.13	4608.13	2284.62
4204	ENSMUSG00000026526	Fh1	14194	fumarate hydratase 1 [Source:MGI Symbol;Acc:MGI:95530]	3602.65	1.04025	0.224927	4.62484	3.74891e-06	5.68451e-05	4994.04	3856.62	5693.45	2573.93	2357.16	2140.71	4848.04	2357.27
4210	ENSMUSG00000026547	Tagln2	21346	transgelin 2 [Source:MGI Symbol;Acc:MGI:1312985]	146.106	1.1262	0.277386	4.06002	4.90677e-05	0.000515487	212.844	179.433	209.052	70.2699	102.519	102.517	200.443	91.7687
4217	ENSMUSG00000026566	Mpzl1	68481	myelin protein zero-like 1 [Source:MGI Symbol;Acc:MGI:1915731]	44.5862	1.02049	0.400818	2.54601	0.0108961	0.0418645	58.4023	72.9696	47.7466	25.2656	38.833	24.3003	59.7061	29.4663
4222	ENSMUSG00000026576	Atp1b1	11931	ATPase, Na+/K+ transporting, beta 1 polypeptide [Source:MGI Symbol;Acc:MGI:88108]	1241.66	1.70764	0.295343	5.78189	7.38646e-09	2.40739e-07	2304.94	2100.57	1298.19	627.692	443.473	675.093	1901.23	582.086
4235	ENSMUSG00000026604	Ptpn14	19250	protein tyrosine phosphatase, non-receptor type 14 [Source:MGI Symbol;Acc:MGI:102467]	88.7685	1.70716	0.521713	3.27222	0.00106705	0.00659656	181.696	45.4565	180.663	50.5311	27.1831	47.0819	135.938	41.5987
4237	ENSMUSG00000026608	Kctd3	226823	potassium channel tetramerisation domain containing 3 [Source:MGI Symbol;Acc:MGI:2444629]	437.052	2.35076	0.46587	5.04595	4.51268e-07	8.98996e-06	1278.36	271.543	642.643	150.014	149.895	129.855	730.849	143.255
4251	ENSMUSG00000026628	Atf3	11910	activating transcription factor 3 [Source:MGI Symbol;Acc:MGI:109384]	5159.75	8.63564	0.48187	17.9211	8.07569e-72	3.43479e-68	16934.1	6640.24	7306.51	39.4775	10.0966	28.0973	10293.6	25.8904
4264	ENSMUSG00000026655	Fam107b	66540	family with sequence similarity 107, member B [Source:MGI Symbol;Acc:MGI:1913790]	1811.89	1.65617	0.412309	4.01682	5.89884e-05	0.00060094	1171.94	2963.04	4117.82	1099.84	781.32	737.363	2750.93	872.842
4273	ENSMUSG00000026670	Uap1	107652	UDP-N-acetylglucosamine pyrophosphorylase 1 [Source:MGI Symbol;Acc:MGI:1334459]	1056.92	1.06473	0.224216	4.74867	2.04761e-06	3.40528e-05	1484.72	1157.94	1647.9	701.12	736.273	613.583	1430.19	683.659
4292	ENSMUSG00000026718	Stam	20844	signal transducing adaptor molecule (SH3 domain and ITAM motif) 1 [Source:MGI Symbol;Acc:MGI:1329014]	524.365	1.45106	0.295671	4.90767	9.21633e-07	1.68963e-05	1036.96	546.674	720.07	320.557	283.481	238.447	767.903	280.828
4303	ENSMUSG00000026749	Nek6	59126	NIMA (never in mitosis gene a)-related expressed kinase 6 [Source:MGI Symbol;Acc:MGI:1891638]	880.798	1.01851	0.29378	3.4669	0.0005265	0.00369132	1579.46	933.054	1025.91	466.624	554.535	725.213	1179.47	582.124
4304	ENSMUSG00000026750	Psmb7	19177	proteasome (prosome, macropain) subunit, beta type 7 [Source:MGI Symbol;Acc:MGI:107637]	950.808	1.02154	0.211667	4.82614	1.39204e-06	2.43902e-05	1427.61	1070.62	1324	650.588	662.491	569.539	1274.08	627.539
4314	ENSMUSG00000026773	Pfkfb3	170768	6-phosphofructo-2-kinase/fructose-2,6-biphosphatase 3 [Source:MGI Symbol;Acc:MGI:2181202]	687.093	1.37156	0.414103	3.31211	0.000925936	0.00585611	1704.05	741.658	527.793	375.825	315.324	457.909	991.166	383.019
4319	ENSMUSG00000026782	Abi2	329165	abl-interactor 2 [Source:MGI Symbol;Acc:MGI:106913]	182.4	1.49876	0.257529	5.81978	5.89254e-09	1.97342e-07	325.755	228.479	254.218	93.1668	97.8591	94.9231	269.484	95.3164
4327	ENSMUSG00000026796	Fam129b	227737	family with sequence similarity 129, member B [Source:MGI Symbol;Acc:MGI:2442910]	88.796	1.57463	0.355745	4.42628	9.58706e-06	0.000128126	182.994	108.856	107.107	41.8461	38.0563	53.9163	132.986	44.6063
4338	ENSMUSG00000026819	Slc25a25	227731	solute carrier family 25 (mitochondrial carrier, phosphate carrier), member 25 [Source:MGI Symbol;Acc:MGI:1915913]	15469.3	3.01843	0.365136	8.26661	1.37824e-16	1.60603e-14	30084.9	29107.7	23426.8	5372.88	1874.08	2949.45	27539.8	3398.8
4340	ENSMUSG00000026821	Ralgds	19730	ral guanine nucleotide dissociation stimulator [Source:MGI Symbol;Acc:MGI:107485]	86.6138	3.01397	0.681822	4.42047	9.84877e-06	0.000131006	341.329	34.6905	86.46	14.2119	20.9698	22.0222	154.16	19.068
4345	ENSMUSG00000026832	Cytip	227929	cytohesin 1 interacting protein [Source:MGI Symbol;Acc:MGI:2183535]	50.4501	3.38449	0.472647	7.16071	8.02591e-13	5.31303e-11	112.911	89.7167	73.5555	14.2119	6.98994	5.3157	92.0611	8.83917
4348	ENSMUSG00000026837	Col5a1	12831	collagen, type V, alpha 1 [Source:MGI Symbol;Acc:MGI:88457]	100.221	1.21529	0.320757	3.7888	0.000151376	0.00130068	134.974	179.433	105.817	52.1102	63.6861	65.3071	140.075	60.3678
4362	ENSMUSG00000026864	Hspa5	14828	heat shock protein 5 [Source:MGI Symbol;Acc:MGI:95835]	18778.1	1.21164	0.336871	3.59675	0.000322212	0.00243095	37325.5	14670.5	26695.5	10340.7	10528.4	13107.7	26230.5	11325.6
4374	ENSMUSG00000026885	Ttll11	74410	tubulin tyrosine ligase-like family, member 11 [Source:MGI Symbol;Acc:MGI:1921660]	35.2542	2.11393	0.608971	3.47132	0.000517911	0.00364635	45.424	33.4943	92.9122	12.6328	21.7465	5.3157	57.2768	13.2317
4382	ENSMUSG00000026914	Psmd14	59029	proteasome (prosome, macropain) 26S subunit, non-ATPase, 14 [Source:MGI Symbol;Acc:MGI:1913284]	844.947	1.25508	0.254069	4.93992	7.8156e-07	1.46601e-05	1338.06	854.103	1380.78	510.838	521.915	463.984	1190.98	498.913
4414	ENSMUSG00000026977	March7	57438	membrane-associated ring finger (C3HC4) 7 [Source:MGI Symbol;Acc:MGI:1931053]	1095.69	1.36595	0.346917	3.93739	8.23711e-05	0.00079174	2289.37	861.281	1585.96	681.381	562.302	593.839	1578.87	612.507
4440	ENSMUSG00000027068	Dhrs9	241452	dehydrogenase/reductase (SDR family) member 9 [Source:MGI Symbol;Acc:MGI:2442798]	16.6111	1.83341	0.690814	2.65399	0.00795461	0.0326888	42.8283	14.3547	20.6472	11.8432	5.43662	4.55631	25.9434	7.27872
4444	ENSMUSG00000027075	Slc43a1	72401	solute carrier family 43, member 1 [Source:MGI Symbol;Acc:MGI:1931352]	173.399	1.3651	0.388439	3.51433	0.000440867	0.00316476	198.568	397.146	153.563	113.695	90.0925	87.3293	249.759	97.039
4473	ENSMUSG00000027171	Prrg4	228413	proline rich Gla (G-carboxyglutamic acid) 4 (transmembrane) [Source:MGI Symbol;Acc:MGI:2442211]	43.0684	3.61667	0.838557	4.31297	1.61074e-05	0.000199589	116.805	5.98112	116.14	9.47459	6.21328	3.79693	79.642	6.49493
4494	ENSMUSG00000027204	Fbn1	14118	fibrillin 1 [Source:MGI Symbol;Acc:MGI:95489]	50.3955	1.42888	0.383636	3.72458	0.00019564	0.0015956	81.7632	72.9696	65.8128	21.3178	23.2998	37.2099	73.5152	27.2758
4501	ENSMUSG00000027222	Pex16	18633	peroxisomal biogenesis factor 16 [Source:MGI Symbol;Acc:MGI:1338829]	1008.97	1.44612	0.236549	6.1134	9.75302e-10	3.79698e-08	1271.87	1307.47	1849.21	590.583	495.509	539.163	1476.18	541.752
4526	ENSMUSG00000027285	Haus2	66296	HAUS augmin-like complex, subunit 2 [Source:MGI Symbol;Acc:MGI:1913546]	267.75	1.06544	0.28195	3.77882	0.000157575	0.00134139	423.092	251.207	412.943	164.226	188.728	166.305	362.414	173.087
4552	ENSMUSG00000027333	Smox	228608	spermine oxidase [Source:MGI Symbol;Acc:MGI:2445356]	71.3226	2.56656	0.59852	4.28818	1.80142e-05	0.00022017	220.631	35.8867	109.688	13.4223	20.9698	27.3379	122.068	20.5767
4554	ENSMUSG00000027340	Slc23a2	54338	solute carrier family 23 (nucleobase transporters), member 2 [Source:MGI Symbol;Acc:MGI:1859682]	623.779	1.16305	0.433028	2.68586	0.0072344	0.0303075	1110.94	308.626	1167.85	385.3	406.97	362.986	862.474	385.085
4557	ENSMUSG00000027346	Gpcpd1	74182	glycerophosphocholine phosphodiesterase 1 [Source:MGI Symbol;Acc:MGI:104898]	5857.98	1.33962	0.480107	2.79025	0.00526667	0.0234253	4172.52	6100.74	14920.2	4403.32	1709.43	3841.73	8397.8	3318.16
4565	ENSMUSG00000027360	Hdc	15186	histidine decarboxylase [Source:MGI Symbol;Acc:MGI:96062]	557.885	2.83596	0.366511	7.73773	1.01211e-14	8.92178e-13	647.616	828.983	1459.5	173.701	94.7525	142.764	978.698	137.073
4581	ENSMUSG00000027397	Slc20a1	20515	solute carrier family 20, member 1 [Source:MGI Symbol;Acc:MGI:108392]	5298.58	4.12106	0.287219	14.3482	1.09401e-46	9.79596e-44	10874.5	6762.25	12427	665.59	467.549	594.599	10021.3	575.913
4583	ENSMUSG00000027399	Il1a	16175	interleukin 1 alpha [Source:MGI Symbol;Acc:MGI:96542]	103.093	1.78486	0.387942	4.60084	4.20791e-06	6.27975e-05	192.079	185.415	101.945	45.0043	31.843	62.2696	159.813	46.3723
4585	ENSMUSG00000027405	Nop56	67134	NOP56 ribonucleoprotein [Source:MGI Symbol;Acc:MGI:1914384]	624.633	1.36906	0.469922	2.91338	0.00357537	0.017263	913.671	299.056	1489.18	396.354	353.38	296.16	900.634	348.631
4598	ENSMUSG00000027433	Xrn2	24128	5'-3' exoribonuclease 2 [Source:MGI Symbol;Acc:MGI:894687]	1154.58	1.11658	0.249335	4.47825	7.52588e-06	0.00010435	1951.93	1172.3	1616.93	785.601	701.324	699.394	1580.39	728.773
4599	ENSMUSG00000027435	Cd93	17064	CD93 antigen [Source:MGI Symbol;Acc:MGI:106664]	306.197	2.09757	0.40145	5.22499	1.74169e-07	3.94033e-06	842.29	305.037	341.969	119.222	106.402	122.261	496.432	115.962
4600	ENSMUSG00000027438	Napb	17957	N-ethylmaleimide sensitive fusion protein attachment protein beta [Source:MGI Symbol;Acc:MGI:104562]	56.5979	1.19399	0.358493	3.33057	0.000866669	0.00554108	97.3371	70.5772	68.3937	37.1088	38.833	27.3379	78.7693	34.4266
4604	ENSMUSG00000027455	Nsfl1c	386649	NSFL1 (p97) cofactor (p47) [Source:MGI Symbol;Acc:MGI:3042273]	851.977	1.25752	0.248256	5.06543	4.07478e-07	8.20406e-06	1466.55	888.794	1249.15	488.731	525.799	492.841	1201.5	502.457
4619	ENSMUSG00000027499	Pkia	18767	protein kinase inhibitor, alpha [Source:MGI Symbol;Acc:MGI:104747]	27.2242	1.58619	0.547869	2.8952	0.00378918	0.0180778	41.5305	52.6338	28.3898	7.89549	10.8732	22.0222	40.8514	13.597
4629	ENSMUSG00000027523	Gnas	14683	GNAS (guanine nucleotide binding protein, alpha stimulating) complex locus [Source:MGI Symbol;Acc:MGI:95777]	63.3373	1.15781	0.394583	2.93427	0.00334333	0.0164156	118.102	66.9885	77.4268	26.8447	47.3762	43.285	87.5059	39.1686
4637	ENSMUSG00000027551	Zfp64	22722	zinc finger protein 64 [Source:MGI Symbol;Acc:MGI:107342]	156.228	1.43867	0.478466	3.00684	0.00263977	0.013613	284.224	74.1658	326.483	81.3236	82.3259	88.8481	228.291	84.1659
4662	ENSMUSG00000027613	Eif6	16418	eukaryotic translation initiation factor 6 [Source:MGI Symbol;Acc:MGI:1196288]	702.556	1.21569	0.306859	3.96173	7.44076e-05	0.000727526	1274.47	623.232	1049.13	370.299	403.086	495.119	982.278	422.835
4665	ENSMUSG00000027620	Rbm39	170791	RNA binding motif protein 39 [Source:MGI Symbol;Acc:MGI:2157953]	3347.14	1.552	0.287643	5.39558	6.83018e-08	1.70885e-06	5832.44	3106.59	6036.71	1752.01	1643.41	1711.65	4991.91	1702.36
4668	ENSMUSG00000027630	Tbl1xr1	81004	transducin (beta)-like 1X-linked receptor 1 [Source:MGI Symbol;Acc:MGI:2441730]	1106.95	1.29065	0.273042	4.72694	2.27926e-06	3.70718e-05	1639.16	1173.5	1902.12	516.365	632.201	778.37	1571.59	642.312
4681	ENSMUSG00000027660	Skil	20482	SKI-like [Source:MGI Symbol;Acc:MGI:106203]	746.055	1.73072	0.428669	4.03742	5.40426e-05	0.000559603	1983.08	540.693	916.218	369.509	277.268	389.565	1146.66	345.447
4705	ENSMUSG00000027712	Anxa5	11747	annexin A5 [Source:MGI Symbol;Acc:MGI:106008]	672.093	1.64495	0.503472	3.26721	0.00108613	0.00669506	1974	357.671	723.941	336.348	361.147	279.454	1018.54	325.649
4710	ENSMUSG00000027737	Slc7a11	26570	solute carrier family 7 (cationic amino acid transporter, y+ system), member 11 [Source:MGI Symbol;Acc:MGI:1347355]	25.3393	4.99643	1.17303	4.25943	2.04945e-05	0.000246411	75.274	1.19622	70.9746	0	1.55332	3.03754	49.1483	1.53029
4714	ENSMUSG00000027750	Postn	50706	periostin, osteoblast specific factor [Source:MGI Symbol;Acc:MGI:1926321]	143.851	1.0206	0.239989	4.25269	2.1122e-05	0.000252529	195.972	193.788	188.405	88.4295	94.7525	101.758	192.722	94.9799
4732	ENSMUSG00000027801	Tm4sf4	229302	transmembrane 4 superfamily member 4 [Source:MGI Symbol;Acc:MGI:2385173]	1280.57	1.46766	0.239727	6.12222	9.22818e-10	3.61749e-08	2324.41	1593.37	1725.33	714.542	745.593	580.17	1881.04	680.102
4736	ENSMUSG00000027806	Tsc22d2	72033	TSC22 domain family, member 2 [Source:MGI Symbol;Acc:MGI:1919283]	1530.98	2.04311	0.38282	5.337	9.44994e-08	2.28694e-06	3752.02	1147.18	2493.14	614.269	578.611	600.674	2464.11	597.851
4746	ENSMUSG00000027829	Ccnl1	56706	cyclin L1 [Source:MGI Symbol;Acc:MGI:1922664]	4751.89	3.8387	0.483425	7.94064	2.01134e-15	2.00111e-13	17511.6	4085.1	5052.1	731.912	542.885	587.764	8882.93	620.854
4756	ENSMUSG00000027859	Ngf	18049	nerve growth factor [Source:MGI Symbol;Acc:MGI:97321]	19.4867	2.20283	0.63316	3.4791	0.000503095	0.00355152	49.3175	28.7094	18.0663	3.94775	7.7666	9.11262	32.031	6.94232
4762	ENSMUSG00000027879	Sec22b	20333	SEC22 homolog B, vesicle trafficking protein [Source:MGI Symbol;Acc:MGI:1338759]	1014.14	1.03621	0.266958	3.88153	0.000103802	0.000960816	1759.85	980.903	1349.81	605.584	672.587	716.1	1363.52	664.757
4763	ENSMUSG00000027881	Prpf38b	66921	PRP38 pre-mRNA processing factor 38 (yeast) domain containing B [Source:MGI Symbol;Acc:MGI:1914171]	1065.88	1.1653	0.293295	3.97315	7.09276e-05	0.000701157	1874.06	925.877	1623.38	622.165	698.994	650.793	1474.44	657.317
4774	ENSMUSG00000027907	S100a11	20195	S100 calcium binding protein A11 [Source:MGI Symbol;Acc:MGI:1338798]	50.5664	1.14059	0.406786	2.8039	0.00504879	0.02264	86.9545	41.8678	80.0077	30.0029	34.9497	29.616	69.61	31.5229
4786	ENSMUSG00000027952	Pmvk	68603	phosphomevalonate kinase [Source:MGI Symbol;Acc:MGI:1915853]	386.161	1.22872	0.40947	3.00076	0.0026931	0.0138282	908.48	367.241	348.421	172.122	228.338	292.363	541.38	230.941
4788	ENSMUSG00000027954	Efna1	13636	ephrin A1 [Source:MGI Symbol;Acc:MGI:103236]	3525.44	4.61707	0.41128	11.2261	3.03567e-29	1.29115e-26	11376.8	3067.12	5880.57	269.236	274.938	284.01	6774.81	276.061
4806	ENSMUSG00000028001	Fga	14161	fibrinogen alpha chain [Source:MGI Symbol;Acc:MGI:1316726]	214676	1.03458	0.35435	2.91965	0.0035043	0.0170047	362129	220240	283168	83104.8	130713	208701	288512	140840
4811	ENSMUSG00000028010	Gar1	68147	GAR1 ribonucleoprotein [Source:MGI Symbol;Acc:MGI:1930948]	82.9529	1.15847	0.391038	2.96256	0.0030509	0.0152842	129.783	66.9885	147.111	39.4775	54.3662	59.9914	114.627	51.2784
4812	ENSMUSG00000028011	Tdo2	56720	tryptophan 2,3-dioxygenase [Source:MGI Symbol;Acc:MGI:1928486]	39500.9	1.10837	0.261544	4.23781	2.25715e-05	0.000267416	50564.7	58545.6	52798.7	32415.7	24790.2	17890.4	53969.6	25032.1
4835	ENSMUSG00000028057	Rit1	19769	Ras-like without CAAX 1 [Source:MGI Symbol;Acc:MGI:108053]	161.56	1.03438	0.307563	3.36314	0.000770612	0.005027	289.416	154.313	207.762	112.906	99.4124	105.555	217.163	105.958
4844	ENSMUSG00000028073	Pear1	73182	platelet endothelial aggregation receptor 1 [Source:MGI Symbol;Acc:MGI:1920432]	114.788	1.29316	0.284895	4.53907	5.65018e-06	8.16015e-05	145.357	173.452	170.339	63.1639	55.9195	80.4948	163.049	66.5261
4863	ENSMUSG00000028108	Ecm1	13601	extracellular matrix protein 1 [Source:MGI Symbol;Acc:MGI:103060]	812.955	1.35793	0.250326	5.42465	5.80669e-08	1.49003e-06	1448.38	1019.18	1041.39	372.667	503.275	492.841	1169.65	456.261
4871	ENSMUSG00000028132	Tmem56	99887	transmembrane protein 56 [Source:MGI Symbol;Acc:MGI:1923195]	6330.69	1.35183	0.258089	5.23785	1.62462e-07	3.72e-06	11209.3	7954.88	8127.24	4404.89	3450.7	2837.06	9097.15	3564.22
4901	ENSMUSG00000028195	Cyr61	16007	cysteine rich protein 61 [Source:MGI Symbol;Acc:MGI:88613]	1180.52	5.91366	0.543934	10.872	1.56687e-27	5.9238e-25	4593.01	1669.93	704.584	45.7938	31.0664	38.7286	2322.51	38.5296
4905	ENSMUSG00000028211	Trp53inp1	60599	transformation related protein 53 inducible nuclear protein 1 [Source:MGI Symbol;Acc:MGI:1926609]	8133.5	1.54838	0.481971	3.2126	0.00131541	0.00779485	16769.2	15056.9	4541.08	6544.57	2535.79	3353.45	12122.4	4144.6
4907	ENSMUSG00000028214	Gem	14579	GTP binding protein (gene overexpressed in skeletal muscle) [Source:MGI Symbol;Acc:MGI:99844]	32.0938	2.91961	0.573811	5.0881	3.61661e-07	7.44909e-06	70.0827	74.1658	25.8089	9.47459	5.43662	7.59385	56.6858	7.50169
4924	ENSMUSG00000028249	Sdcbp	53378	syndecan binding protein [Source:MGI Symbol;Acc:MGI:1337026]	1071.64	1.0895	0.333915	3.26281	0.00110313	0.00678017	2225.77	933.054	1215.6	654.536	743.263	657.628	1458.14	685.142
4929	ENSMUSG00000028266	Lmo4	16911	LIM domain only 4 [Source:MGI Symbol;Acc:MGI:109360]	157.494	1.09537	0.304834	3.59332	0.000326496	0.00245605	233.609	149.528	260.67	114.485	96.3058	90.3668	214.602	100.386
4932	ENSMUSG00000028271	Gtf2b	229906	general transcription factor IIB [Source:MGI Symbol;Acc:MGI:2385191]	437.077	1.14672	0.337218	3.40054	0.000672523	0.0045028	555.47	367.241	883.956	268.447	299.791	247.56	602.222	271.932
4944	ENSMUSG00000028300	3110043O21Rik	73205	RIKEN cDNA 3110043O21 gene [Source:MGI Symbol;Acc:MGI:1920455]	659.259	2.29774	0.325246	7.06462	1.6106e-12	1.034e-10	1239.43	674.67	1373.04	243.181	170.088	255.153	1095.71	222.808
4950	ENSMUSG00000028327	Stra6l	74152	STRA6-like [Source:MGI Symbol;Acc:MGI:1921402]	3158.57	1.91235	0.294153	6.50121	7.96775e-11	3.87301e-09	7039.42	4071.94	3862.31	1286.18	1140.91	1550.66	4991.22	1325.92
4958	ENSMUSG00000028341	Nr4a3	18124	nuclear receptor subfamily 4, group A, member 3 [Source:MGI Symbol;Acc:MGI:1352457]	5.2694	2.83569	1.14673	2.47284	0.0134044	0.0492082	15.5739	9.56979	2.58089	1.5791	1.55332	0.759385	9.24154	1.29727
4961	ENSMUSG00000028345	Tex10	269536	testis expressed gene 10 [Source:MGI Symbol;Acc:MGI:1344413]	185.346	1.17053	0.361393	3.23893	0.0011998	0.00723069	354.307	143.547	272.284	108.168	131.255	102.517	256.713	113.98
4965	ENSMUSG00000028359	Orm3	18407	orosomucoid 3 [Source:MGI Symbol;Acc:MGI:97445]	485.741	4.24573	0.516251	8.22416	1.96569e-16	2.22948e-14	813.738	673.474	1281.41	28.4238	20.1932	97.2013	922.875	48.6061
4970	ENSMUSG00000028381	Ugcg	22234	UDP-glucose ceramide glucosyltransferase [Source:MGI Symbol;Acc:MGI:1332243]	649.796	1.84431	0.461	4.00068	6.31602e-05	0.000635449	1809.17	520.357	720.07	206.072	405.416	237.688	1016.53	283.059
4999	ENSMUSG00000028437	Ubap1	67123	ubiquitin-associated protein 1 [Source:MGI Symbol;Acc:MGI:2149543]	1027.52	1.01451	0.345675	2.93486	0.00333703	0.0163941	1914.3	764.387	1445.3	818.762	639.191	583.208	1374.66	680.387
5003	ENSMUSG00000028444	Cntfr	12804	ciliary neurotrophic factor receptor [Source:MGI Symbol;Acc:MGI:99605]	48.6889	1.40855	0.423431	3.32651	0.000879419	0.00560358	76.5718	46.6527	89.0409	32.3715	18.6398	28.8566	70.7551	26.6227
5026	ENSMUSG00000028480	Glipr2	384009	GLI pathogenesis-related 2 [Source:MGI Symbol;Acc:MGI:1917770]	12.2554	1.89432	0.762993	2.48275	0.0130372	0.0481445	27.2544	20.3358	10.3236	9.47459	3.10664	3.03754	19.3046	5.20626
5029	ENSMUSG00000028494	Plin2	11520	perilipin 2 [Source:MGI Symbol;Acc:MGI:87920]	25500.9	4.25931	0.325016	13.1049	3.0854e-39	2.18717e-36	51785.9	26977.2	66649	2551.82	2444.92	2596.34	48470.7	2531.03
5039	ENSMUSG00000028525	Pde4b	18578	phosphodiesterase 4B, cAMP specific [Source:MGI Symbol;Acc:MGI:99557]	283.436	3.20517	0.496746	6.45233	1.10143e-10	5.17642e-09	792.973	172.256	569.087	57.6371	37.2797	71.3822	511.439	55.433
5046	ENSMUSG00000028541	B4galt2	53418	UDP-Gal:betaGlcNAc beta 1,4- galactosyltransferase, polypeptide 2 [Source:MGI Symbol;Acc:MGI:1858493]	9.59063	4.58181	1.36155	3.36515	0.000765021	0.00500204	10.3826	3.58867	41.2943	0	0	2.27816	18.4219	0.759385
5079	ENSMUSG00000028613	Lrp8	16975	low density lipoprotein receptor-related protein 8, apolipoprotein e receptor [Source:MGI Symbol;Acc:MGI:1340044]	5.71591	3.77683	1.32237	2.85611	0.00428862	0.0198861	14.2761	4.78489	12.9045	0	2.32998	0	10.6552	0.77666
5088	ENSMUSG00000028633	Ctps	51797	cytidine 5'-triphosphate synthase [Source:MGI Symbol;Acc:MGI:1858304]	280.801	1.94615	0.607863	3.20162	0.00136656	0.0080475	364.69	81.3432	891.699	112.906	114.946	119.223	445.911	115.692
5095	ENSMUSG00000028645	Slc2a1	20525	solute carrier family 2 (facilitated glucose transporter), member 1 [Source:MGI Symbol;Acc:MGI:95755]	439.796	2.82514	0.443003	6.37726	1.80283e-10	8.15733e-09	1358.83	343.316	610.382	111.326	103.296	111.63	770.841	108.751
5103	ENSMUSG00000028655	Mfsd2a	76574	major facilitator superfamily domain containing 2A [Source:MGI Symbol;Acc:MGI:1923824]	2389.89	3.71394	0.886806	4.188	2.81428e-05	0.000322637	5052.44	2477.38	5794.11	525.05	434.153	56.1945	4441.31	338.466
5115	ENSMUSG00000028680	Plk3	12795	polo like kinase 3 [Source:MGI Symbol;Acc:MGI:109604]	7978.43	3.81283	0.371641	10.2595	1.07308e-24	3.38079e-22	23411.5	10425.1	10854	1093.53	737.827	1348.67	14896.9	1060.01
5145	ENSMUSG00000028744	Pqlc2	212555	PQ loop repeat containing 2 [Source:MGI Symbol;Acc:MGI:2384837]	247.733	1.12446	0.383896	2.92907	0.00339981	0.0166353	356.903	391.165	270.994	97.1145	120.382	249.838	339.687	155.778
5147	ENSMUSG00000028755	Cda	72269	cytidine deaminase [Source:MGI Symbol;Acc:MGI:1919519]	152.162	2.12861	0.408768	5.20738	1.91527e-07	4.26334e-06	363.392	126.8	252.928	52.1102	69.8994	47.8413	247.706	56.617
5156	ENSMUSG00000028776	Tinagl1	94242	tubulointerstitial nephritis antigen-like 1 [Source:MGI Symbol;Acc:MGI:2137617]	237.984	1.04091	0.274776	3.78821	0.000151738	0.00130306	390.646	245.226	325.193	155.541	134.362	176.937	320.355	155.613
5165	ENSMUSG00000028796	Phc2	54383	polyhomeotic 2 [Source:MGI Symbol;Acc:MGI:1860454]	271.142	1.1024	0.431527	2.55465	0.0106295	0.0410721	594.405	154.313	361.325	189.492	171.642	155.674	370.014	172.269
5180	ENSMUSG00000028833	Ncdn	26562	neurochondrin [Source:MGI Symbol;Acc:MGI:1347351]	286.354	2.28349	0.427179	5.34552	9.01559e-08	2.19118e-06	554.173	193.788	677.485	99.4832	82.3259	110.87	475.149	97.5598
5181	ENSMUSG00000028837	Psmb2	26445	proteasome (prosome, macropain) subunit, beta type 2 [Source:MGI Symbol;Acc:MGI:1347045]	839.771	1.09174	0.214765	5.08339	3.70749e-07	7.59946e-06	1227.75	977.314	1224.63	468.203	586.378	554.351	1143.23	536.311
5195	ENSMUSG00000028862	Map3k6	53608	mitogen-activated protein kinase kinase kinase 6 [Source:MGI Symbol;Acc:MGI:1855691]	62.2798	2.29242	0.401117	5.71509	1.09645e-08	3.43533e-07	120.698	81.3432	108.398	15.0014	17.8632	30.3754	103.48	21.08
5197	ENSMUSG00000028864	Hgf	15234	hepatocyte growth factor [Source:MGI Symbol;Acc:MGI:96079]	229.024	1.18408	0.328208	3.60772	0.000308901	0.00235033	465.92	238.048	250.347	142.908	125.042	151.877	318.105	139.943
5199	ENSMUSG00000028869	Gnl2	230737	guanine nucleotide binding protein-like 2 (nucleolar) [Source:MGI Symbol;Acc:MGI:2385207]	993.021	1.56148	0.36212	4.31206	1.61741e-05	0.000200139	1903.91	714.145	1832.44	475.309	492.402	539.923	1483.5	502.545
5209	ENSMUSG00000028889	Yrdc	230734	yrdC domain containing (E.coli) [Source:MGI Symbol;Acc:MGI:2387201]	263.115	1.62884	0.359976	4.52486	6.04352e-06	8.61126e-05	410.114	217.713	565.216	141.329	127.372	116.945	397.681	128.549
5216	ENSMUSG00000028901	Gmeb1	56809	glucocorticoid modulatory element binding protein 1 [Source:MGI Symbol;Acc:MGI:2135604]	140.956	1.09283	0.320311	3.4118	0.000645365	0.0043518	219.333	125.603	230.99	86.8504	100.189	82.773	191.975	89.9375
5224	ENSMUSG00000028917	Plekhm2	69582	pleckstrin homology domain containing, family M (with RUN domain) member 2 [Source:MGI Symbol;Acc:MGI:1916832]	281.638	1.26779	0.317268	3.99595	6.44361e-05	0.000645994	475.005	241.637	477.466	180.017	161.545	154.155	398.036	165.239
5247	ENSMUSG00000028961	Pgd	110208	phosphogluconate dehydrogenase [Source:MGI Symbol;Acc:MGI:97553]	422.605	1.40618	0.370089	3.79957	0.000144948	0.00125816	994.136	387.576	459.399	221.074	254.744	218.703	613.704	231.507
5250	ENSMUSG00000028967	Errfi1	74155	ERBB receptor feedback inhibitor 1 [Source:MGI Symbol;Acc:MGI:1921405]	26537	1.12591	0.285499	3.94367	8.02457e-05	0.000774937	47073.5	23889.8	38226.9	18715.5	14727.8	16588.8	36396.7	16677.3
5257	ENSMUSG00000028977	Casz1	69743	castor zinc finger 1 [Source:MGI Symbol;Acc:MGI:1196251]	38.507	3.10664	0.586453	5.29734	1.175e-07	2.79976e-06	60.9979	29.9056	116.14	7.89549	6.98994	9.11262	69.0146	7.99935
5258	ENSMUSG00000028978	Nos3	18127	nitric oxide synthase 3, endothelial cell [Source:MGI Symbol;Acc:MGI:97362]	102.581	2.54979	0.525868	4.84873	1.24257e-06	2.20667e-05	94.7414	181.826	249.056	53.6893	21.7465	14.4283	175.208	29.9547
5261	ENSMUSG00000028982	Slc25a33	70556	solute carrier family 25, member 33 [Source:MGI Symbol;Acc:MGI:1917806]	407.245	1.37854	0.208839	6.60099	4.08427e-11	2.08666e-09	589.214	589.738	585.863	209.231	210.475	258.95	588.272	226.219
5272	ENSMUSG00000029003	Mad2l2	71890	MAD2 mitotic arrest deficient-like 2 [Source:MGI Symbol;Acc:MGI:1919140]	130.286	1.0238	0.296179	3.45669	0.000546848	0.00380046	157.037	224.89	141.949	76.5863	91.6458	89.6075	174.625	85.9465
5275	ENSMUSG00000029009	Mthfr	17769	methylenetetrahydrofolate reductase [Source:MGI Symbol;Acc:MGI:106639]	86.5639	1.00026	0.369069	2.71023	0.00672361	0.0285472	115.507	133.977	96.7835	57.6371	36.503	78.9761	115.422	57.7054
5310	ENSMUSG00000029082	Bst1	12182	bone marrow stromal cell antigen 1 [Source:MGI Symbol;Acc:MGI:105370]	30.474	1.62051	0.463892	3.49328	0.000477122	0.00339209	53.2109	37.0829	47.7466	9.47459	17.8632	17.4659	46.0135	14.9345
5312	ENSMUSG00000029086	Prom1	19126	prominin 1 [Source:MGI Symbol;Acc:MGI:1100886]	24.3417	2.76607	0.865552	3.19573	0.00139476	0.00817678	24.6587	7.17734	95.4931	10.2641	4.65996	3.79693	42.4431	6.24034
5337	ENSMUSG00000029135	Fosl2	14284	fos-like antigen 2 [Source:MGI Symbol;Acc:MGI:102858]	514.537	2.58735	0.467855	5.53024	3.19793e-08	8.82904e-07	1585.95	570.598	490.37	100.273	128.926	211.109	882.305	146.769
5353	ENSMUSG00000029166	Mapre3	100732	microtubule-associated protein, RP/EB family, member 3 [Source:MGI Symbol;Acc:MGI:2140967]	572.955	1.61488	0.258974	6.23568	4.49828e-10	1.89429e-08	831.908	660.315	1099.46	307.135	261.734	277.176	863.895	282.015
5354	ENSMUSG00000029167	Ppargc1a	19017	peroxisome proliferative activated receptor, gamma, coactivator 1 alpha [Source:MGI Symbol;Acc:MGI:1342774]	247.988	1.65904	0.402211	4.12482	3.71032e-05	0.000406987	192.079	478.489	459.399	157.12	118.829	82.0136	376.656	119.321
5356	ENSMUSG00000029171	Pgm1	66681	phosphoglucomutase 1 [Source:MGI Symbol;Acc:MGI:97564]	156.177	1.52862	0.383263	3.98844	6.6508e-05	0.000662859	317.968	131.585	246.475	60.0057	81.5493	99.4795	232.009	80.3448
5362	ENSMUSG00000029178	Klf3	16599	Kruppel-like factor 3 (basic) [Source:MGI Symbol;Acc:MGI:1342773]	2324.53	1.68452	0.377303	4.46464	8.02038e-06	0.000109952	4554.08	1827.83	4255.9	1404.61	761.127	1143.63	3545.93	1103.12
5366	ENSMUSG00000029188	Slc34a2	20531	solute carrier family 34 (sodium phosphate), member 2 [Source:MGI Symbol;Acc:MGI:1342284]	35.4229	3.67457	0.751135	4.89203	9.98029e-07	1.81793e-05	106.422	44.2603	46.4561	5.52684	0	9.87201	65.7128	5.13295
5377	ENSMUSG00000029203	Ube2k	53323	ubiquitin-conjugating enzyme E2K [Source:MGI Symbol;Acc:MGI:1858216]	777.295	1.009	0.220023	4.58587	4.5209e-06	6.69783e-05	1177.13	863.673	1074.94	555.843	531.235	460.947	1038.58	516.008
5384	ENSMUSG00000029217	Tec	21682	tec protein tyrosine kinase [Source:MGI Symbol;Acc:MGI:98662]	352.518	1.13412	0.265772	4.26725	1.97895e-05	0.000239119	612.575	369.633	471.013	207.651	244.648	209.59	484.407	220.63
5388	ENSMUSG00000029229	Chic2	74277	cysteine-rich hydrophobic domain 2 [Source:MGI Symbol;Acc:MGI:1921527]	577.64	1.68358	0.274518	6.13285	8.63188e-10	3.3994e-08	1121.32	633.998	887.828	303.976	241.541	277.176	881.05	274.231
5389	ENSMUSG00000029231	Pdgfra	18595	platelet derived growth factor receptor, alpha polypeptide [Source:MGI Symbol;Acc:MGI:97530]	148.848	1.35778	0.348089	3.90065	9.59341e-05	0.00089628	276.437	202.162	163.887	86.8504	55.9195	107.833	214.162	83.5342
5405	ENSMUSG00000029272	Sult1e1	20860	sulfotransferase family 1E, member 1 [Source:MGI Symbol;Acc:MGI:98431]	78.1498	4.59787	1.34232	3.42532	0.000614086	0.00416841	349.116	9.56979	91.6218	8.68504	1.55332	8.35324	150.102	6.1972
5420	ENSMUSG00000029314	Gpat3	231510	glycerol-3-phosphate acyltransferase 3 [Source:MGI Symbol;Acc:MGI:3603816]	584.425	2.09322	0.311539	6.71896	1.83022e-11	1.01096e-09	783.888	720.126	1336.9	188.702	206.591	270.341	946.973	221.878
5422	ENSMUSG00000029321	Slc10a6	75750	solute carrier family 10 (sodium/bile acid cotransporter family), member 6 [Source:MGI Symbol;Acc:MGI:1923000]	27.2541	3.60896	0.624417	5.77972	7.48239e-09	2.43399e-07	76.5718	35.8867	38.7134	3.94775	2.32998	6.07508	50.3907	4.1176
5423	ENSMUSG00000029322	Plac8	231507	placenta-specific 8 [Source:MGI Symbol;Acc:MGI:2445289]	59.0382	1.28209	0.354905	3.6125	0.000303259	0.00231464	99.9328	63.3998	87.7504	33.1611	39.6096	30.3754	83.6943	34.382
5425	ENSMUSG00000029328	Hnrnpdl	50926	heterogeneous nuclear ribonucleoprotein D-like [Source:MGI Symbol;Acc:MGI:1355299]	1309.45	1.21187	0.298414	4.06103	4.88571e-05	0.000514042	2325.71	1173.5	1988.58	719.279	931.992	717.619	1829.26	789.63
5431	ENSMUSG00000029352	Crybb3	12962	crystallin, beta B3 [Source:MGI Symbol;Acc:MGI:102717]	63.0623	2.38801	0.669885	3.5648	0.000364127	0.00269695	182.994	41.8678	92.9122	5.52684	17.8632	37.2099	105.925	20.2
5433	ENSMUSG00000029364	Wsb2	59043	WD repeat and SOCS box-containing 2 [Source:MGI Symbol;Acc:MGI:2144041]	565.674	1.22324	0.2592	4.71929	2.36666e-06	3.83466e-05	1029.18	655.53	691.68	303.187	370.467	344.001	792.129	339.218
5441	ENSMUSG00000029378	Areg	11839	amphiregulin [Source:MGI Symbol;Acc:MGI:88068]	8.31337	6.86281	1.45604	4.71335	2.43673e-06	3.91835e-05	20.7652	7.17734	21.9376	0	0	0	16.6267	0
5464	ENSMUSG00000029417	Cxcl9	17329	chemokine (C-X-C motif) ligand 9 [Source:MGI Symbol;Acc:MGI:1352449]	73.7373	1.90172	0.64572	2.94511	0.00322837	0.0159664	238.8	58.6149	51.6179	30.7924	48.9296	13.6689	116.344	31.1303
5469	ENSMUSG00000029430	Ran	19384	RAN, member RAS oncogene family [Source:MGI Symbol;Acc:MGI:1333112]	1631.33	1.51776	0.290573	5.22333	1.75734e-07	3.97047e-06	2718.95	1509.63	3026.1	809.288	863.646	860.383	2418.23	844.439
5502	ENSMUSG00000029482	Aacs	78894	acetoacetyl-CoA synthetase [Source:MGI Symbol;Acc:MGI:1926144]	1014.51	1.27248	0.313451	4.05957	4.91635e-05	0.000515989	1591.14	1735.72	978.159	417.671	638.414	725.972	1435.01	594.019
5529	ENSMUSG00000029552	Tes	21753	testis derived transcript [Source:MGI Symbol;Acc:MGI:105081]	112.009	2.71248	0.685264	3.9583	7.54836e-05	0.000736358	423.092	32.298	127.754	26.0551	26.4064	36.4505	194.381	29.6373
5544	ENSMUSG00000029580	Actb	11461	actin, beta [Source:MGI Symbol;Acc:MGI:87904]	18866.2	2.93781	0.319244	9.20239	3.50084e-20	6.33614e-18	50346.6	23672.1	26110.9	4021.96	4116.3	4929.17	33376.5	4355.81
5550	ENSMUSG00000029596	Sdsl	257635	serine dehydratase-like [Source:MGI Symbol;Acc:MGI:2182607]	222.277	1.0057	0.240845	4.17574	2.97021e-05	0.000337556	317.968	270.346	301.965	168.964	149.119	125.299	296.76	147.794
5551	ENSMUSG00000029597	Sds	231691	serine dehydratase [Source:MGI Symbol;Acc:MGI:98270]	3973.45	2.30989	0.34853	6.62752	3.41378e-11	1.78155e-09	4447.66	7840.05	7551.7	1890.18	1265.18	845.955	6613.13	1333.77
5577	ENSMUSG00000029648	Flt1	14254	FMS-like tyrosine kinase 1 [Source:MGI Symbol;Acc:MGI:95558]	317.923	1.12997	0.248698	4.54355	5.53141e-06	8.01584e-05	429.581	363.652	516.179	212.389	169.312	216.425	436.471	199.375
5578	ENSMUSG00000029649	Pomp	66537	proteasome maturation protein [Source:MGI Symbol;Acc:MGI:1913787]	1140.74	1.02328	0.199557	5.12774	2.93244e-07	6.1821e-06	1608.01	1344.55	1635	728.754	831.026	697.116	1529.19	752.298
5582	ENSMUSG00000029657	Hsph1	15505	heat shock 105kDa/110kDa protein 1 [Source:MGI Symbol;Acc:MGI:105053]	689.689	1.20556	0.475943	2.533	0.011309	0.0430042	1718.32	387.576	780.721	459.518	510.265	281.732	962.207	417.172
5597	ENSMUSG00000029695	Aass	30956	aminoadipate-semialdehyde synthase [Source:MGI Symbol;Acc:MGI:1353573]	17625.6	1.7927	0.249865	7.17466	7.2489e-13	4.8363e-11	29987.6	20325	31754	8103.14	8898.19	6685.63	27355.6	7895.65
5644	ENSMUSG00000029817	Tra2a	101214	transformer 2 alpha [Source:MGI Symbol;Acc:MGI:1933972]	565.936	1.84713	0.361728	5.1064	3.28348e-07	6.84582e-06	1140.79	440.21	1076.23	222.653	243.871	271.86	885.745	246.128
5645	ENSMUSG00000029821	Gsdme	54722	gasdermin E [Source:MGI Symbol;Acc:MGI:1889850]	187.713	1.06645	0.265526	4.01635	5.91057e-05	0.000601774	268.65	202.162	291.641	105.01	130.479	128.336	254.151	121.275
5656	ENSMUSG00000029860	Zyx	22793	zyxin [Source:MGI Symbol;Acc:MGI:103072]	498.487	1.80682	0.398105	4.53856	5.66408e-06	8.17328e-05	1331.57	528.731	465.851	214.757	225.231	224.778	775.385	221.589
5680	ENSMUSG00000030022	Adamts9	101401	a disintegrin-like and metallopeptidase (reprolysin type) with thrombospondin type 1 motif, 9 [Source:MGI Symbol;Acc:MGI:1916320]	35.4757	1.33428	0.486965	2.73999	0.00614419	0.0265038	62.2957	34.6905	55.4892	23.6865	10.8732	25.8191	50.8251	20.1263
5698	ENSMUSG00000030060	Hmces	232210	5-hydroxymethylcytosine (hmC) binding, ES cell specific [Source:MGI Symbol;Acc:MGI:1914053]	107.365	1.22412	0.366382	3.3411	0.00083448	0.00537562	224.524	120.819	105.817	61.5848	71.4527	59.9914	150.386	64.343
5701	ENSMUSG00000030064	Frmd4b	232288	FERM domain containing 4B [Source:MGI Symbol;Acc:MGI:2141794]	1854.22	1.73683	0.311152	5.58193	2.37858e-08	6.84718e-07	2280.28	4088.69	2188.6	1059.57	753.36	754.829	2852.52	855.921
5717	ENSMUSG00000030103	Bhlhe40	20893	basic helix-loop-helix family, member e40 [Source:MGI Symbol;Acc:MGI:1097714]	5051.86	2.43209	0.349226	6.96422	3.30223e-12	2.04294e-10	13738.8	6121.07	5712.81	1571.2	1564.97	1602.3	8524.23	1579.49
5731	ENSMUSG00000030142	Clec4e	56619	C-type lectin domain family 4, member e [Source:MGI Symbol;Acc:MGI:1861232]	8.35223	4.96259	1.32081	3.75725	0.000171794	0.00143906	29.85	8.37356	10.3236	0.789549	0.77666	0	16.1824	0.52207
5732	ENSMUSG00000030144	Clec4d	17474	C-type lectin domain family 4, member d [Source:MGI Symbol;Acc:MGI:1298389]	12.4933	3.12475	0.873269	3.57823	0.000345934	0.00258357	37.637	16.7471	12.9045	1.5791	0.77666	5.3157	22.4295	2.55715
5738	ENSMUSG00000030161	Gabarapl1	57436	gamma-aminobutyric acid (GABA) A receptor-associated protein-like 1 [Source:MGI Symbol;Acc:MGI:1914980]	5102.27	1.46498	0.290243	5.04742	4.47819e-07	8.9317e-06	6692.9	6793.35	8986.68	3784.31	2211.15	2145.26	7490.98	2713.57
5746	ENSMUSG00000030188	Magohb	66441	mago homolog B, exon junction complex core component [Source:MGI Symbol;Acc:MGI:1913691]	29.054	1.76487	0.484402	3.6434	0.000269058	0.00208922	50.6153	29.9056	54.1988	13.4223	16.3099	9.87201	44.9066	13.2014
5747	ENSMUSG00000030189	Ybx3	56449	Y box protein 3 [Source:MGI Symbol;Acc:MGI:2137670]	421.714	1.17084	0.330133	3.54656	0.000390291	0.00285102	686.551	330.158	735.555	243.181	249.308	285.529	584.088	259.339
5748	ENSMUSG00000030199	Etv6	14011	ets variant 6 [Source:MGI Symbol;Acc:MGI:109336]	331.32	1.1979	0.272533	4.39543	1.10552e-05	0.000145013	611.277	389.969	383.263	205.283	214.358	183.771	461.503	201.137
5750	ENSMUSG00000030203	Dusp16	70686	dual specificity phosphatase 16 [Source:MGI Symbol;Acc:MGI:1917936]	1669.91	1.75451	0.442468	3.96527	7.33135e-05	0.000719724	4824.03	1407.95	1496.92	800.603	718.41	771.535	2576.3	763.516
5753	ENSMUSG00000030208	Emp1	13730	epithelial membrane protein 1 [Source:MGI Symbol;Acc:MGI:107941]	38.6087	1.74416	0.504448	3.45756	0.000545083	0.00379284	64.8914	65.7923	47.7466	7.10594	24.8531	21.2628	59.4767	17.7406
5775	ENSMUSG00000030247	Kcnj8	16523	potassium inwardly-rectifying channel, subfamily J, member 8 [Source:MGI Symbol;Acc:MGI:1100508]	51.7641	1.04402	0.33924	3.07753	0.00208723	0.0113414	75.274	69.3809	64.5224	29.2133	36.503	35.6911	69.7258	33.8025
5777	ENSMUSG00000030254	Rad18	58186	RAD18 E3 ubiquitin protein ligase [Source:MGI Symbol;Acc:MGI:1890476]	69.9195	2.05325	0.458959	4.4737	7.68767e-06	0.000106161	119.4	57.4187	161.306	22.1074	36.503	22.7816	112.708	27.1306
5779	ENSMUSG00000030256	Bhlhe41	79362	basic helix-loop-helix family, member e41 [Source:MGI Symbol;Acc:MGI:1930704]	31.9093	1.06471	0.419665	2.53704	0.0111795	0.0426527	33.7435	45.4565	50.3274	18.1596	21.7465	22.0222	43.1758	20.6428
5789	ENSMUSG00000030278	Cidec	14311	cell death-inducing DFFA-like effector c [Source:MGI Symbol;Acc:MGI:95585]	473.065	4.0263	0.476388	8.45172	2.87032e-17	3.56443e-15	874.736	336.139	1463.37	71.849	52.8129	39.488	891.414	54.7166
5819	ENSMUSG00000030341	Tnfrsf1a	21937	tumor necrosis factor receptor superfamily, member 1a [Source:MGI Symbol;Acc:MGI:1314884]	974.418	1.2888	0.337805	3.81523	0.000136058	0.00119688	2010.34	948.605	1189.79	437.41	536.672	723.694	1382.91	565.925
5847	ENSMUSG00000030432	Rpl28	19943	ribosomal protein L28 [Source:MGI Symbol;Acc:MGI:101839]	2368.2	1.07802	0.187223	5.75794	8.5149e-09	2.74364e-07	3073.26	3057.55	3511.31	1395.13	1502.06	1669.89	3214.04	1522.36
5856	ENSMUSG00000030471	Zdhhc13	243983	zinc finger, DHHC domain containing 13 [Source:MGI Symbol;Acc:MGI:1919227]	191.924	1.31571	0.367999	3.57531	0.000349815	0.00260912	372.477	145.939	303.255	96.325	121.159	112.389	273.89	109.958
5861	ENSMUSG00000030494	Rhpn2	52428	rhophilin, Rho GTPase binding protein 2 [Source:MGI Symbol;Acc:MGI:1289234]	898.851	2.89459	0.51907	5.5765	2.45401e-08	7.03886e-07	2692.99	409.108	1651.77	203.704	257.074	178.456	1584.62	213.078
5866	ENSMUSG00000030512	Snrpa1	68981	small nuclear ribonucleoprotein polypeptide A' [Source:MGI Symbol;Acc:MGI:1916231]	256.913	1.30318	0.256152	5.08753	3.62763e-07	7.46274e-06	410.114	306.233	380.682	141.329	176.302	126.817	365.676	148.149
5897	ENSMUSG00000030591	Psmd8	57296	proteasome (prosome, macropain) 26S subunit, non-ATPase, 8 [Source:MGI Symbol;Acc:MGI:1888669]	2753.06	1.77752	0.27731	6.40989	1.45628e-10	6.75087e-09	5315.9	2775.24	4697.23	1217.48	1283.04	1229.44	4262.79	1243.32
5898	ENSMUSG00000030595	Nfkbib	18036	nuclear factor of kappa light polypeptide gene enhancer in B cells inhibitor, beta [Source:MGI Symbol;Acc:MGI:104752]	264.733	2.03723	0.30399	6.70163	2.06114e-11	1.12033e-09	525.62	285.897	465.851	93.1668	98.6358	119.223	425.79	103.675
5901	ENSMUSG00000030603	Psmc4	23996	proteasome (prosome, macropain) 26S subunit, ATPase, 4 [Source:MGI Symbol;Acc:MGI:1346093]	1336.24	1.17236	0.212436	5.51866	3.41602e-08	9.35856e-07	1889.64	1519.2	2144.72	804.551	855.879	803.43	1851.19	821.286
5904	ENSMUSG00000030609	Aen	68048	apoptosis enhancing nuclease [Source:MGI Symbol;Acc:MGI:1915298]	229.348	1.1271	0.388152	2.90375	0.00368717	0.0176865	469.814	155.509	318.74	156.331	138.245	137.449	314.688	144.008
5913	ENSMUSG00000030629	Zfand6	65098	zinc finger, AN1-type domain 6 [Source:MGI Symbol;Acc:MGI:1929510]	1548.38	1.06957	0.200264	5.3408	9.2536e-08	2.24261e-06	2234.86	1946.26	2111.17	1155.11	916.458	926.45	2097.43	999.34
5916	ENSMUSG00000030643	Rab30	75985	RAB30, member RAS oncogene family [Source:MGI Symbol;Acc:MGI:1923235]	6151.47	5.51941	0.825294	6.68781	2.2654e-11	1.21581e-09	8456.65	2342.21	25322.4	284.238	264.064	239.206	12040.4	262.503
5921	ENSMUSG00000030655	Smg1	233789	SMG1 homolog, phosphatidylinositol 3-kinase-related kinase (C. elegans) [Source:MGI Symbol;Acc:MGI:1919742]	2248.34	1.54965	0.232041	6.67833	2.41684e-11	1.28896e-09	4057.01	2748.92	3249.35	1211.96	1231.78	990.998	3351.76	1144.91
5939	ENSMUSG00000030695	Aldoa	11674	aldolase A, fructose-bisphosphate [Source:MGI Symbol;Acc:MGI:87994]	1449.96	1.45042	0.265698	5.45889	4.79133e-08	1.25215e-06	2155.69	1503.65	2709.94	829.027	791.416	710.025	2123.09	776.823
5943	ENSMUSG00000030704	Rab6a	19346	RAB6A, member RAS oncogene family [Source:MGI Symbol;Acc:MGI:894313]	1346.88	1.13651	0.277419	4.09672	4.19046e-05	0.000451789	2024.61	1217.76	2312.48	877.979	810.833	837.602	1851.62	842.138
5946	ENSMUSG00000030708	Dnajb13	69387	DnaJ heat shock protein family (Hsp40) member B13 [Source:MGI Symbol;Acc:MGI:1916637]	10.3075	2.2371	0.8818	2.53697	0.0111815	0.0426527	14.2761	25.1207	11.614	0.789549	7.7666	2.27816	17.0036	3.61143
5966	ENSMUSG00000030742	Lat	16797	linker for activation of T cells [Source:MGI Symbol;Acc:MGI:1342293]	6.74362	2.68897	1.07133	2.50995	0.012075	0.0452692	2.59566	14.3547	18.0663	1.5791	3.10664	0.759385	11.6722	1.81504
5978	ENSMUSG00000030762	Aqp8	11833	aquaporin 8 [Source:MGI Symbol;Acc:MGI:1195271]	725.622	2.68912	0.360009	7.46959	8.04453e-14	6.13729e-12	1944.15	730.892	1094.3	180.017	222.125	182.252	1256.45	194.798
5990	ENSMUSG00000030787	Lyve1	114332	lymphatic vessel endothelial hyaluronan receptor 1 [Source:MGI Symbol;Acc:MGI:2136348]	870.062	1.47203	0.286166	5.14397	2.68988e-07	5.77086e-06	1497.69	983.296	1356.26	569.265	332.41	481.45	1279.08	461.042
5992	ENSMUSG00000030790	Adm	11535	adrenomedullin [Source:MGI Symbol;Acc:MGI:108058]	42.1352	2.24065	0.463324	4.83604	1.32453e-06	2.33758e-05	101.231	61.0074	46.4561	15.0014	11.6499	17.4659	69.5647	14.7057
6018	ENSMUSG00000030847	Bag3	29810	BCL2-associated athanogene 3 [Source:MGI Symbol;Acc:MGI:1352493]	645.65	2.22939	0.452531	4.92648	8.37239e-07	1.56184e-05	1427.61	375.614	1389.81	290.554	204.262	186.049	1064.35	226.955
6021	ENSMUSG00000030852	Tacc2	57752	transforming, acidic coiled-coil containing protein 2 [Source:MGI Symbol;Acc:MGI:1928899]	1106.1	2.5805	0.552675	4.66911	3.02513e-06	4.70551e-05	3247.17	2049.13	389.715	266.078	320.76	363.746	1895.34	316.861
6031	ENSMUSG00000030878	Cdr2	12585	cerebellar degeneration-related 2 [Source:MGI Symbol;Acc:MGI:1100885]	34.3741	1.74718	0.576986	3.02811	0.00246088	0.012879	97.3371	37.0829	24.5185	15.791	17.0865	14.4283	52.9795	15.7686
6047	ENSMUSG00000030930	Chst15	77590	carbohydrate (N-acetylgalactosamine 4-sulfate 6-O) sulfotransferase 15 [Source:MGI Symbol;Acc:MGI:1924840]	328.43	1.40785	0.285528	4.93071	8.19328e-07	1.53178e-05	607.383	351.69	472.304	165.805	160.769	212.628	477.126	179.734
6077	ENSMUSG00000031024	St5	76954	suppression of tumorigenicity 5 [Source:MGI Symbol;Acc:MGI:108517]	487.566	2.75675	0.314404	8.7682	1.81543e-18	2.59546e-16	794.271	681.847	1072.36	112.116	92.4225	172.38	849.493	125.64
6107	ENSMUSG00000031150	Ccdc120	54648	coiled-coil domain containing 120 [Source:MGI Symbol;Acc:MGI:1859619]	81.0957	3.09698	0.43628	7.0986	1.26028e-12	8.1525e-11	190.781	117.23	127.754	9.47459	14.7565	26.5785	145.255	16.9365
6149	ENSMUSG00000031266	Gla	11605	galactosidase, alpha [Source:MGI Symbol;Acc:MGI:1347344]	113.533	1.31088	0.342814	3.82388	0.000131369	0.00116831	228.418	126.8	130.335	75.0072	63.6861	56.9539	161.851	65.2157
6150	ENSMUSG00000031271	Serpina7	331535	serine (or cysteine) peptidase inhibitor, clade A (alpha-1 antiproteinase, antitrypsin), member 7 [Source:MGI Symbol;Acc:MGI:3041197]	1079.6	1.50133	0.453166	3.31298	0.000923076	0.00584119	2904.54	955.782	926.541	433.462	773.553	483.728	1595.62	563.581
6152	ENSMUSG00000031278	Acsl4	50790	acyl-CoA synthetase long-chain family member 4 [Source:MGI Symbol;Acc:MGI:1354713]	2140.52	1.16197	0.306395	3.79239	0.000149204	0.00128853	4243.9	2230.96	2401.52	1575.15	1277.61	1114.02	2958.79	1322.26
6153	ENSMUSG00000031283	Chrdl1	83453	chordin-like 1 [Source:MGI Symbol;Acc:MGI:1933172]	12.0775	2.38418	0.694733	3.43179	0.000599619	0.00409527	18.1696	15.5509	27.0994	3.94775	4.65996	3.03754	20.2733	3.88175
6189	ENSMUSG00000031381	Piga	18700	phosphatidylinositol glycan anchor biosynthesis, class A [Source:MGI Symbol;Acc:MGI:99461]	138.191	1.15213	0.321662	3.5818	0.00034124	0.00255153	241.396	127.996	202.6	75.7967	96.3058	85.0511	190.664	85.7179
6224	ENSMUSG00000031482	Slc25a15	18408	solute carrier family 25 (mitochondrial carrier ornithine transporter), member 15 [Source:MGI Symbol;Acc:MGI:1342274]	5089.44	1.03587	0.308448	3.35831	0.000784201	0.00510586	4554.08	9818.6	6152.85	3836.42	3079.46	3095.25	6841.84	3337.04
6230	ENSMUSG00000031489	Adrb3	11556	adrenergic receptor, beta 3 [Source:MGI Symbol;Acc:MGI:87939]	22.7663	3.92571	1.06316	3.69248	0.000222075	0.00178468	6.48914	93.3054	28.3898	1.5791	0	6.83447	42.7281	2.80452
6231	ENSMUSG00000031490	Eif4ebp1	13685	eukaryotic translation initiation factor 4E binding protein 1 [Source:MGI Symbol;Acc:MGI:103267]	535.186	1.72791	0.334449	5.16644	2.38598e-07	5.17104e-06	612.575	790.704	1063.33	188.702	201.932	353.874	822.202	248.169
6233	ENSMUSG00000031502	Col4a1	12826	collagen, type IV, alpha 1 [Source:MGI Symbol;Acc:MGI:88454]	934.139	1.30866	0.324148	4.03724	5.40834e-05	0.000559684	1887.04	884.009	1222.05	467.413	474.539	669.778	1331.03	537.243
6234	ENSMUSG00000031503	Col4a2	12827	collagen, type IV, alpha 2 [Source:MGI Symbol;Acc:MGI:88455]	669.811	1.08769	0.311733	3.48917	0.000484526	0.00343755	1270.57	830.179	632.319	373.457	389.883	522.457	911.024	428.599
6235	ENSMUSG00000031504	Rab20	19332	RAB20, member RAS oncogene family [Source:MGI Symbol;Acc:MGI:102789]	138.551	1.71169	0.455311	3.75937	0.000170339	0.00143251	380.264	116.034	140.659	60.0057	65.2394	69.1041	212.319	64.7831
6247	ENSMUSG00000031530	Dusp4	319520	dual specificity phosphatase 4 [Source:MGI Symbol;Acc:MGI:2442191]	171.14	4.50985	0.649525	6.9433	3.83051e-12	2.34419e-10	445.155	59.8112	478.756	7.89549	13.2032	22.0222	327.907	14.3736
6253	ENSMUSG00000031538	Plat	18791	plasminogen activator, tissue [Source:MGI Symbol;Acc:MGI:97610]	8.13991	2.24718	0.846943	2.65328	0.00797138	0.0327419	18.1696	13.1585	9.03313	2.36865	1.55332	4.55631	13.4537	2.82609
6270	ENSMUSG00000031578	Mak16	67920	MAK16 homolog [Source:MGI Symbol;Acc:MGI:1915170]	116.407	1.5039	0.42663	3.52506	0.000423379	0.00305835	207.652	76.5583	232.281	52.1102	67.5694	62.2696	172.164	60.6497
6272	ENSMUSG00000031584	Gsr	14782	glutathione reductase [Source:MGI Symbol;Acc:MGI:95804]	1139.75	1.24324	0.248396	5.00509	5.58351e-07	1.08192e-05	2033.7	1266.8	1507.24	741.387	679.577	609.786	1602.58	676.917
6274	ENSMUSG00000031586	Rbpms	19663	RNA binding protein gene with multiple splicing [Source:MGI Symbol;Acc:MGI:1334446]	1392.74	2.88112	0.40106	7.18377	6.78163e-13	4.57841e-11	2391.9	1094.54	3871.34	341.085	304.451	353.114	2452.59	332.883
6296	ENSMUSG00000031633	Slc25a4	11739	solute carrier family 25 (mitochondrial carrier, adenine nucleotide translocator), member 4 [Source:MGI Symbol;Acc:MGI:1353495]	62.8003	1.09459	0.357577	3.06114	0.00220497	0.0118375	81.7632	72.9696	101.945	46.5834	28.7364	44.8037	85.5594	40.0412
6316	ENSMUSG00000031681	Smad1	17125	SMAD family member 1 [Source:MGI Symbol;Acc:MGI:109452]	350.833	1.74001	0.347395	5.00873	5.47902e-07	1.06409e-05	772.208	309.822	538.117	144.487	177.855	162.508	540.049	161.617
6329	ENSMUSG00000031711	Zfp330	30932	zinc finger protein 330 [Source:MGI Symbol;Acc:MGI:1353574]	404.101	1.46693	0.382887	3.83124	0.0001275	0.00114046	813.738	273.935	692.97	203.704	230.668	209.59	593.548	214.654
6341	ENSMUSG00000031740	Mmp2	17390	matrix metallopeptidase 2 [Source:MGI Symbol;Acc:MGI:97009]	30.9042	1.54275	0.507962	3.03712	0.00238847	0.0125624	55.8066	37.0829	45.1657	22.8969	7.7666	16.7065	46.0184	15.79
6350	ENSMUSG00000031762	Mt2	17750	metallothionein 2 [Source:MGI Symbol;Acc:MGI:97172]	549.678	2.93919	0.231793	12.6802	7.61287e-37	4.62563e-34	1123.92	801.47	992.354	126.328	118.829	135.171	972.581	126.776
6351	ENSMUSG00000031765	Mt1	17748	metallothionein 1 [Source:MGI Symbol;Acc:MGI:97171]	15308.8	2.65128	0.263403	10.0655	7.84893e-24	2.22556e-21	30103.1	22422	26714.8	3662.72	3392.45	5557.94	26413.3	4204.37
6357	ENSMUSG00000031776	Arl2bp	107566	ADP-ribosylation factor-like 2 binding protein [Source:MGI Symbol;Acc:MGI:1349429]	62.5948	1.20782	0.424091	2.84802	0.00439919	0.0202828	80.4653	68.1847	113.559	21.3178	41.163	50.8788	87.4031	37.7865
6358	ENSMUSG00000031778	Cx3cl1	20312	chemokine (C-X3-C motif) ligand 1 [Source:MGI Symbol;Acc:MGI:1097153]	10.6964	2.70652	0.738208	3.66635	0.000246041	0.00193702	19.4674	15.5509	20.6472	2.36865	3.10664	3.03754	18.5552	2.83761
6367	ENSMUSG00000031792	Usb1	101985	U6 snRNA biogenesis 1 [Source:MGI Symbol;Acc:MGI:2142454]	156.771	1.16514	0.347382	3.35407	0.000796313	0.00517679	317.968	150.724	181.953	91.5877	111.062	87.3293	216.882	96.6598
6369	ENSMUSG00000031799	Tpm4	326618	tropomyosin 4 [Source:MGI Symbol;Acc:MGI:2449202]	504.796	1.99673	0.370008	5.39644	6.79769e-08	1.70574e-06	1065.52	389.969	966.545	188.702	222.125	195.921	807.344	202.249
6383	ENSMUSG00000031825	Crispld2	78892	cysteine-rich secretory protein LCCL domain containing 2 [Source:MGI Symbol;Acc:MGI:1926142]	21.2234	1.93657	0.55844	3.46782	0.000524701	0.00368113	48.0196	32.298	20.6472	8.68504	10.0966	7.59385	33.6549	8.79182
6397	ENSMUSG00000031843	Mphosph6	68533	M phase phosphoprotein 6 [Source:MGI Symbol;Acc:MGI:1915783]	55.4719	1.40114	0.342871	4.08649	4.37943e-05	0.000468305	84.3588	69.3809	87.7504	30.0029	26.4064	34.9317	80.4967	30.447
6399	ENSMUSG00000031845	Bco1	63857	beta-carotene oxygenase 1 [Source:MGI Symbol;Acc:MGI:1926923]	585.527	1.59599	0.318153	5.01641	5.26465e-07	1.02502e-05	1031.77	617.251	991.064	225.811	250.861	396.399	880.029	291.024
6423	ENSMUSG00000031904	Slc7a6	330836	solute carrier family 7 (cationic amino acid transporter, y+ system), member 6 [Source:MGI Symbol;Acc:MGI:2142598]	63.5859	5.08692	0.758817	6.70375	2.03135e-11	1.10767e-09	243.992	31.1018	95.4931	5.52684	3.8833	1.51877	123.529	3.64297
6428	ENSMUSG00000031917	Nip7	66164	NIP7, nucleolar pre-rRNA processing protein [Source:MGI Symbol;Acc:MGI:1913414]	294.533	1.67646	0.405764	4.13162	3.60214e-05	0.000397685	507.451	197.377	641.352	134.223	159.215	127.577	448.727	140.338
6441	ENSMUSG00000031939	Taf1d	75316	TATA-box binding protein associated factor, RNA polymerase I, D [Source:MGI Symbol;Acc:MGI:1922566]	551.626	1.91163	0.311085	6.14505	7.99401e-10	3.17762e-08	1133	534.712	947.188	210.81	253.191	230.853	871.635	231.618
6458	ENSMUSG00000031980	Agt	11606	angiotensinogen (serpin peptidase inhibitor, clade A, member 8) [Source:MGI Symbol;Acc:MGI:87963]	14109.7	2.30072	0.272885	8.43109	3.42458e-17	4.19153e-15	26235.6	16080.8	28058.2	5393.41	4873.54	4016.39	23458.2	4761.11
6463	ENSMUSG00000031986	Sprtn	244666	SprT-like N-terminal domain [Source:MGI Symbol;Acc:MGI:2685351]	240.652	1.2798	0.320351	3.995	6.46943e-05	0.000647819	319.266	226.086	477.466	142.119	149.119	129.855	340.939	140.364
6508	ENSMUSG00000032080	Apoa4	11808	apolipoprotein A-IV [Source:MGI Symbol;Acc:MGI:88051]	7244.4	3.96387	0.498046	7.95885	1.7364e-15	1.74801e-13	18468.1	4385.35	17995.3	488.731	905.585	1223.37	13616.2	872.562
6534	ENSMUSG00000032135	Mcam	84004	melanoma cell adhesion molecule [Source:MGI Symbol;Acc:MGI:1933966]	45.1922	1.5273	0.41041	3.72139	0.000198132	0.00161438	57.1044	87.3243	56.7797	26.0551	27.1831	16.7065	67.0695	23.3149
6542	ENSMUSG00000032184	Lysmd2	70082	LysM, putative peptidoglycan-binding, domain containing 2 [Source:MGI Symbol;Acc:MGI:1917332]	17.7264	2.4814	0.750932	3.30443	0.000951707	0.00599016	27.2544	19.1396	43.8752	2.36865	2.32998	11.3908	30.0897	5.36313
6546	ENSMUSG00000032193	Ldlr	16835	low density lipoprotein receptor [Source:MGI Symbol;Acc:MGI:96765]	5445.59	2.2859	0.279872	8.16765	3.14451e-16	3.47386e-14	7959.58	6929.72	12224.4	2215.47	1641.08	1703.3	9037.9	1853.29
6557	ENSMUSG00000032220	Myo1e	71602	myosin IE [Source:MGI Symbol;Acc:MGI:106621]	2105.5	2.00209	0.335342	5.97031	2.36806e-09	8.60852e-08	4716.31	1896.01	3497.11	934.037	723.07	866.459	3369.81	841.188
6579	ENSMUSG00000032280	Tle3	21887	transducin-like enhancer of split 3 [Source:MGI Symbol;Acc:MGI:104634]	340.906	1.79274	0.29203	6.1389	8.30961e-10	3.28549e-08	606.086	385.184	596.187	150.014	121.159	186.809	529.152	152.661
6582	ENSMUSG00000032289	Thsd4	207596	thrombospondin, type I, domain containing 4 [Source:MGI Symbol;Acc:MGI:2672033]	22.6481	1.81411	0.545779	3.32389	0.0008877	0.00564366	32.4457	34.6905	38.7134	4.73729	10.8732	14.4283	35.2832	10.0129
6585	ENSMUSG00000032294	Pkm	18746	pyruvate kinase, muscle [Source:MGI Symbol;Acc:MGI:97591]	171.113	1.09548	0.292784	3.7416	0.000182852	0.0015138	293.309	184.218	221.957	100.273	130.479	96.4419	233.161	109.064
6589	ENSMUSG00000032300	1700017B05Rik	74211	RIKEN cDNA 1700017B05 gene [Source:MGI Symbol;Acc:MGI:1921461]	1403.02	4.76032	0.388433	12.2552	1.57591e-34	8.6487e-32	4264.66	1564.66	2289.25	126.328	73.006	100.239	2706.19	99.8576
6596	ENSMUSG00000032310	Cyp1a2	13077	cytochrome P450, family 1, subfamily a, polypeptide 2 [Source:MGI Symbol;Acc:MGI:88589]	6413.94	1.03633	0.274427	3.77634	0.000159152	0.00135112	8818.74	7428.55	9622.87	5715.55	3672.05	3225.87	8623.38	4204.49
6601	ENSMUSG00000032315	Cyp1a1	13076	cytochrome P450, family 1, subfamily a, polypeptide 1 [Source:MGI Symbol;Acc:MGI:88588]	19.9854	2.24276	0.600974	3.73187	0.000190062	0.00155832	41.5305	40.6716	16.7758	6.31639	8.54326	6.07508	32.9926	6.97824
6616	ENSMUSG00000032349	Elovl5	68801	ELOVL family member 5, elongation of long chain fatty acids (yeast) [Source:MGI Symbol;Acc:MGI:1916051]	12490.6	2.23802	0.288323	7.7622	8.34708e-15	7.5137e-13	25944.9	13127.4	22763.5	4908.63	4025.43	4173.58	20611.9	4369.21
6617	ENSMUSG00000032350	Gclc	14629	glutamate-cysteine ligase, catalytic subunit [Source:MGI Symbol;Acc:MGI:104990]	8698.06	2.40959	0.432945	5.56558	2.61281e-08	7.4334e-07	22259	6076.81	15586	3381.64	3060.04	1824.8	14640.6	2755.49
6623	ENSMUSG00000032369	Plscr1	22038	phospholipid scramblase 1 [Source:MGI Symbol;Acc:MGI:893575]	779.002	3.81888	0.954826	3.99956	6.34608e-05	0.000637719	3247.17	343.316	774.268	56.8475	115.722	136.689	1454.92	103.086
6666	ENSMUSG00000032440	Tgfbr2	21813	transforming growth factor, beta receptor II [Source:MGI Symbol;Acc:MGI:98729]	902.999	1.59853	0.431592	3.7038	0.000212394	0.00171453	1537.93	546.674	1988.58	377.404	373.573	593.839	1357.73	448.272
6684	ENSMUSG00000032484	Ngp	18054	neutrophilic granule protein [Source:MGI Symbol;Acc:MGI:105983]	27.1112	5.36274	0.993566	5.39747	6.75883e-08	1.70101e-06	46.7218	100.483	11.614	0	2.32998	1.51877	52.9395	1.28292
6688	ENSMUSG00000032492	Pth1r	19228	parathyroid hormone 1 receptor [Source:MGI Symbol;Acc:MGI:97801]	56.5573	1.42886	0.55285	2.58454	0.00975099	0.038348	41.5305	123.211	82.5886	39.4775	40.3863	12.1502	82.4434	30.6713
6689	ENSMUSG00000032497	Lrrfip2	71268	leucine rich repeat (in FLII) interacting protein 2 [Source:MGI Symbol;Acc:MGI:1918518]	874.823	1.30896	0.225434	5.80639	6.38337e-09	2.1211e-07	1515.86	1159.14	1064.62	545.578	481.529	482.21	1246.54	503.106
6692	ENSMUSG00000032501	Trib1	211770	tribbles pseudokinase 1 [Source:MGI Symbol;Acc:MGI:2443397]	2776.71	2.50406	0.255838	9.7877	1.27158e-22	2.88446e-20	5247.12	3692.74	5223.73	970.356	647.734	878.609	4721.2	832.233
6697	ENSMUSG00000032515	Csrnp1	215418	cysteine-serine-rich nuclear protein 1 [Source:MGI Symbol;Acc:MGI:2387989]	1166.69	4.543	0.515445	8.81374	1.21035e-18	1.77515e-16	4285.43	826.59	1600.15	131.855	87.7625	68.3447	2237.39	95.9873
6720	ENSMUSG00000032567	Aste1	66595	asteroid homolog 1 [Source:MGI Symbol;Acc:MGI:1913845]	74.9304	1.13252	0.447363	2.53156	0.0113558	0.0431109	119.4	52.6338	136.787	53.6893	56.6962	30.3754	102.94	46.9203
6754	ENSMUSG00000032643	Fhl3	14201	four and a half LIM domains 3 [Source:MGI Symbol;Acc:MGI:1341092]	39.5955	2.42423	0.719694	3.36842	0.000756017	0.0049565	150.548	23.9245	25.8089	13.4223	14.7565	9.11262	66.7605	12.4305
6769	ENSMUSG00000032712	2810474O19Rik	67246	RIKEN cDNA 2810474O19 gene [Source:MGI Symbol;Acc:MGI:1914496]	1167.36	2.31651	0.47586	4.86805	1.12704e-06	2.0265e-05	1436.7	738.07	3658.42	377.404	409.3	384.249	1944.39	390.318
6795	ENSMUSG00000032802	Srxn1	76650	sulfiredoxin 1 homolog (S. cerevisiae) [Source:MGI Symbol;Acc:MGI:104971]	3115.53	3.83715	0.561932	6.8285	8.58074e-12	4.99946e-10	8248.99	1028.75	8193.05	364.772	420.95	436.646	5823.6	407.456
6805	ENSMUSG00000032840	2410131K14Rik	76792	RIKEN cDNA 2410131K14 gene [Source:MGI Symbol;Acc:MGI:1924042]	172.088	1.60783	0.420436	3.8242	0.000131198	0.00116757	256.97	173.452	347.13	89.219	43.4929	122.261	259.184	84.991
6811	ENSMUSG00000032860	P2ry2	18442	purinergic receptor P2Y, G-protein coupled 2 [Source:MGI Symbol;Acc:MGI:105107]	195.349	1.27699	0.389095	3.28196	0.00103089	0.00640723	336.137	154.313	339.388	129.486	74.5593	138.208	276.613	114.084
6822	ENSMUSG00000032902	Slc16a1	20501	solute carrier family 16 (monocarboxylic acid transporters), member 1 [Source:MGI Symbol;Acc:MGI:106013]	1149.92	1.42582	0.305302	4.6702	3.00911e-06	4.6881e-05	2158.29	1131.63	1738.23	584.266	782.873	504.232	1676.05	623.79
6823	ENSMUSG00000032905	Atg12	67526	autophagy related 12 [Source:MGI Symbol;Acc:MGI:1914776]	782.484	1.2462	0.350964	3.55078	0.00038409	0.00281539	1715.73	657.923	929.122	483.204	475.316	433.609	1100.92	464.043
6836	ENSMUSG00000032998	Foxj3	230700	forkhead box J3 [Source:MGI Symbol;Acc:MGI:2443432]	393.051	1.1983	0.352752	3.39702	0.000681245	0.00454867	791.675	303.841	547.15	262.13	212.028	241.484	547.555	238.548
6843	ENSMUSG00000033022	Cdo1	12583	cysteine dioxygenase 1, cytosolic [Source:MGI Symbol;Acc:MGI:105925]	26936.2	1.18217	0.218859	5.40154	6.60711e-08	1.66776e-06	37611.1	35964.5	38605	20439.1	14083.2	14914.3	37393.5	16478.9
6867	ENSMUSG00000033107	Rnf125	67664	ring finger protein 125 [Source:MGI Symbol;Acc:MGI:1914914]	2293.48	2.98298	0.401169	7.43571	1.04006e-13	7.89935e-12	6378.82	1945.06	3891.99	515.576	396.873	632.568	4071.96	515.006
6912	ENSMUSG00000033323	Ctdp1	67655	CTD (carboxy-terminal domain, RNA polymerase II, polypeptide A) phosphatase, subunit 1 [Source:MGI Symbol;Acc:MGI:1926953]	300.174	1.93783	0.459352	4.21861	2.45815e-05	0.000287624	650.212	163.883	614.253	108.168	148.342	116.186	476.116	124.232
6947	ENSMUSG00000033453	Adamts15	235130	a disintegrin-like and metallopeptidase (reprolysin type) with thrombospondin type 1 motif, 15 [Source:MGI Symbol;Acc:MGI:2449569]	73.8136	5.11688	0.515655	9.92308	3.30406e-23	8.51696e-21	189.483	135.173	105.817	3.1582	6.21328	3.03754	143.491	4.13634
6949	ENSMUSG00000033458	Fan1	330554	FANCD2/FANCI-associated nuclease 1 [Source:MGI Symbol;Acc:MGI:3045266]	145.113	1.10133	0.264911	4.15735	3.21958e-05	0.000361073	215.439	157.901	220.666	91.5877	93.1992	91.8856	198.002	92.2242
6959	ENSMUSG00000033508	Asprv1	67855	aspartic peptidase, retroviral-like 1 [Source:MGI Symbol;Acc:MGI:1915105]	3.13927	5.46141	1.70814	3.19729	0.00138727	0.0081385	7.78697	7.17734	3.87134	0	0	0	6.27855	0
6965	ENSMUSG00000033542	Arhgef5	54324	Rho guanine nucleotide exchange factor (GEF) 5 [Source:MGI Symbol;Acc:MGI:1858952]	575.346	1.11623	0.268258	4.16103	3.16815e-05	0.000356009	1038.26	685.436	638.771	315.82	374.35	399.437	787.49	363.202
6990	ENSMUSG00000033684	Qsox1	104009	quiescin Q6 sulfhydryl oxidase 1 [Source:MGI Symbol;Acc:MGI:1330818]	4794.47	1.10419	0.238211	4.63536	3.56324e-06	5.43202e-05	7897.28	6274.19	5462.46	2596.83	3585.84	2950.21	6544.65	3044.29
6991	ENSMUSG00000033685	Ucp2	22228	uncoupling protein 2 (mitochondrial, proton carrier) [Source:MGI Symbol;Acc:MGI:109354]	449.105	1.51083	0.251657	6.00354	1.93059e-09	7.0787e-08	843.588	605.289	545.859	223.442	253.191	223.259	664.912	233.298
7004	ENSMUSG00000033732	Sf3b3	101943	splicing factor 3b, subunit 3 [Source:MGI Symbol;Acc:MGI:1289341]	976.955	1.29036	0.329936	3.91095	9.19319e-05	0.000864587	1824.75	765.583	1570.47	583.477	598.028	519.419	1386.93	566.975
7020	ENSMUSG00000033793	Atp6v1h	108664	ATPase, H+ transporting, lysosomal V1 subunit H [Source:MGI Symbol;Acc:MGI:1914864]	1028.85	1.30927	0.215055	6.08806	1.14288e-09	4.39906e-08	1617.09	1190.24	1591.12	585.056	563.078	626.493	1466.15	591.542
7027	ENSMUSG00000033831	Fgb	110135	fibrinogen beta chain [Source:MGI Symbol;Acc:MGI:99501]	210054	1.18862	0.34398	3.4555	0.000549267	0.0038126	349950	213535	312517	76737.1	125484	182099	292001	128107
7031	ENSMUSG00000033860	Fgg	99571	fibrinogen gamma chain [Source:MGI Symbol;Acc:MGI:95526]	150674	1.21247	0.353123	3.43357	0.000595685	0.00407331	265898	152553	213072	53734.3	88374.6	130411	210508	90839.9
7033	ENSMUSG00000033863	Klf9	16601	Kruppel-like factor 9 [Source:MGI Symbol;Acc:MGI:1333856]	4142.86	1.49382	0.214442	6.9661	3.25847e-12	2.02323e-10	5745.48	7018.24	5579.89	2543.14	1961.07	2009.33	6114.54	2171.18
7046	ENSMUSG00000033917	Gde1	56209	glycerophosphodiester phosphodiesterase 1 [Source:MGI Symbol;Acc:MGI:1891827]	908.024	1.10893	0.229843	4.8247	1.40213e-06	2.45163e-05	1120.03	1203.4	1398.84	697.172	500.169	528.532	1240.76	575.291
7100	ENSMUSG00000034135	Sik3	70661	SIK family kinase 3 [Source:MGI Symbol;Acc:MGI:2446296]	1086.51	1.16407	0.190295	6.11719	9.52422e-10	3.72496e-08	1556.1	1356.52	1594.99	709.015	686.567	615.861	1502.54	670.481
7104	ENSMUSG00000034158	Lrrc58	320184	leucine rich repeat containing 58 [Source:MGI Symbol;Acc:MGI:2443542]	3826.03	1.7508	0.46961	3.72821	0.000192846	0.00157659	9088.69	1928.31	6680.65	2207.58	1763.79	1287.16	5899.22	1752.84
7138	ENSMUSG00000034269	Setd5	72895	SET domain containing 5 [Source:MGI Symbol;Acc:MGI:1920145]	1055.64	1.02142	0.245075	4.16779	3.0756e-05	0.000347907	1783.22	1120.86	1339.48	767.442	649.288	673.575	1414.52	696.768
7147	ENSMUSG00000034300	Fam53c	66306	family with sequence similarity 53, member C [Source:MGI Symbol;Acc:MGI:1913556]	302.41	1.16848	0.428759	2.72527	0.00642484	0.0275052	537.301	166.275	552.311	217.916	191.058	149.599	418.629	186.191
7182	ENSMUSG00000034437	Gm9761		predicted gene 9761 [Source:MGI Symbol;Acc:MGI:3708640]	4.67286	3.45678	1.34403	2.57194	0.0101129	0.0395339	12.9783	2.39245	10.3236	0.789549	1.55332	0	8.56477	0.780956
7208	ENSMUSG00000034543	Morc2a	74522	microrchidia 2A [Source:MGI Symbol;Acc:MGI:1921772]	408.095	1.51813	0.356559	4.25771	2.06529e-05	0.000247791	654.105	316.999	843.953	207.651	198.048	227.816	605.019	211.172
7221	ENSMUSG00000034593	Myo5a	17918	myosin VA [Source:MGI Symbol;Acc:MGI:105976]	21.8205	1.37498	0.536651	2.56214	0.0104028	0.0404347	44.1261	32.298	18.0663	12.6328	11.6499	12.1502	31.4968	12.1443
7235	ENSMUSG00000034640	Tiparp	99929	TCDD-inducible poly(ADP-ribose) polymerase [Source:MGI Symbol;Acc:MGI:2159210]	1876.19	4.28174	0.407897	10.4971	8.90623e-26	3.1567e-23	6020.62	1943.86	2742.2	214.757	138.245	197.44	3568.9	183.481
7243	ENSMUSG00000034663	Bmp2k	140780	BMP2 inducible kinase [Source:MGI Symbol;Acc:MGI:2155456]	266.065	1.37963	0.393239	3.50838	0.000450847	0.00322551	480.196	186.611	486.499	181.596	114.169	147.321	384.435	147.695
7248	ENSMUSG00000034675	Dbn1	56320	drebrin 1 [Source:MGI Symbol;Acc:MGI:1931838]	29.1242	2.70598	0.594729	4.54994	5.36608e-06	7.8095e-05	80.4653	31.1018	40.0039	3.94775	10.8732	8.35324	50.5237	7.72474
7249	ENSMUSG00000034681	Rnps1	19826	ribonucleic acid binding protein S1 [Source:MGI Symbol;Acc:MGI:97960]	304.704	2.18381	0.3146	6.94155	3.87829e-12	2.36492e-10	550.279	314.607	633.61	122.38	104.072	103.276	499.498	109.91
7254	ENSMUSG00000034708	Grn	14824	granulin [Source:MGI Symbol;Acc:MGI:95832]	3912.55	1.00964	0.284643	3.54704	0.00038959	0.00284834	5474.24	3903.28	6307.71	1911.5	2670.16	3208.4	5228.41	2596.69
7260	ENSMUSG00000034731	Dgkh	380921	diacylglycerol kinase, eta [Source:MGI Symbol;Acc:MGI:2444188]	161.04	1.9229	0.440825	4.36206	1.28846e-05	0.000165322	258.268	107.66	398.748	72.6385	60.5795	68.3447	254.892	67.1875
7268	ENSMUSG00000034765	Dusp5	240672	dual specificity phosphatase 5 [Source:MGI Symbol;Acc:MGI:2685183]	214.74	5.58808	0.580083	9.63325	5.7869e-22	1.24623e-19	789.079	300.252	172.92	5.52684	6.98994	13.6689	420.75	8.72857
7290	ENSMUSG00000034845	Plvap	84094	plasmalemma vesicle associated protein [Source:MGI Symbol;Acc:MGI:1890497]	251.652	1.0152	0.245943	4.12778	3.66276e-05	0.00040333	377.668	342.12	290.351	180.017	139.022	180.734	336.713	166.591
7302	ENSMUSG00000034889	Cactin	70312	cactin, spliceosome C complex subunit [Source:MGI Symbol;Acc:MGI:1917562]	186.297	1.50963	0.472979	3.19174	0.00141419	0.00827075	401.029	92.1092	334.226	84.4818	108.732	97.2013	275.788	96.8051
7318	ENSMUSG00000034936	Arl4d	80981	ADP-ribosylation factor-like 4D [Source:MGI Symbol;Acc:MGI:1933155]	1691.96	2.57739	0.453124	5.68805	1.285e-08	3.95328e-07	4342.53	2935.53	1416.91	664.011	238.435	554.351	2898.33	485.599
7322	ENSMUSG00000034957	Cebpa	12606	CCAAT/enhancer binding protein (C/EBP), alpha [Source:MGI Symbol;Acc:MGI:99480]	4680.63	1.38054	0.369671	3.73451	0.00018808	0.0015458	9882.96	3337.46	7070.36	2691.57	2931.11	2170.32	6763.59	2597.67
7334	ENSMUSG00000035021	Baz1a	217578	bromodomain adjacent to zinc finger domain 1A [Source:MGI Symbol;Acc:MGI:1309478]	352.183	1.18551	0.387391	3.06024	0.00221163	0.0118621	794.271	278.72	394.877	248.708	210.475	186.049	489.289	215.077
7338	ENSMUSG00000035041	Creb3l3	208677	cAMP responsive element binding protein 3-like 3 [Source:MGI Symbol;Acc:MGI:2384786]	5521.54	1.14876	0.21779	5.27463	1.33028e-07	3.13029e-06	8124.4	6057.67	8649.87	3584.55	3574.96	3137.78	7610.65	3432.43
7343	ENSMUSG00000035049	Rrp12	107094	ribosomal RNA processing 12 homolog (S. cerevisiae) [Source:MGI Symbol;Acc:MGI:2147437]	255.086	1.12589	0.414296	2.71761	0.00657562	0.0280449	377.668	150.724	521.341	155.541	146.789	178.456	349.911	160.262
7354	ENSMUSG00000035105	Egln3	112407	egl-9 family hypoxia-inducible factor 3 [Source:MGI Symbol;Acc:MGI:1932288]	99.2639	1.12826	0.419732	2.68806	0.00718691	0.0301382	147.952	165.079	95.4931	98.6936	46.5996	41.7662	136.175	62.3531
7377	ENSMUSG00000035199	Arl6ip5	65106	ADP-ribosylation factor-like 6 interacting protein 5 [Source:MGI Symbol;Acc:MGI:1929501]	535.389	1.37663	0.273488	5.03358	4.81392e-07	9.5121e-06	843.588	547.87	927.832	303.187	333.187	256.672	773.097	297.682
7388	ENSMUSG00000035235	Trim13	66597	tripartite motif-containing 13 [Source:MGI Symbol;Acc:MGI:1913847]	33.6753	1.64492	0.541354	3.03853	0.00237739	0.0125299	46.7218	25.1207	81.2982	15.791	20.9698	12.1502	51.0469	16.3037
7417	ENSMUSG00000035356	Nfkbiz	80859	nuclear factor of kappa light polypeptide gene enhancer in B cells inhibitor, zeta [Source:MGI Symbol;Acc:MGI:1931595]	547.002	3.21697	0.503751	6.38603	1.70245e-10	7.78597e-09	1383.48	1257.23	322.612	63.1639	153.002	102.517	987.776	106.228
7420	ENSMUSG00000035372	1810055G02Rik	72056	RIKEN cDNA 1810055G02 gene [Source:MGI Symbol;Acc:MGI:1919306]	1338.82	1.39041	0.331611	4.19291	2.75396e-05	0.000316575	2018.12	1093.35	2703.49	780.864	663.267	773.814	1938.32	739.315
7422	ENSMUSG00000035378	Shq1	72171	SHQ1 homolog (S. cerevisiae) [Source:MGI Symbol;Acc:MGI:1919421]	97.8554	1.4612	0.489298	2.98633	0.00282346	0.014369	208.95	50.2414	171.629	50.5311	44.2696	61.5102	143.607	52.1036
7425	ENSMUSG00000035394	Cfap53	74453	cilia and flagella associated protein 53 [Source:MGI Symbol;Acc:MGI:1921703]	198.388	1.06384	0.426379	2.49505	0.0125938	0.0468405	223.226	197.377	384.553	208.441	93.1992	83.5324	268.386	128.391
7427	ENSMUSG00000035399	Oser1	66680	oxidative stress responsive serine rich 1 [Source:MGI Symbol;Acc:MGI:1913930]	375.001	2.18382	0.38231	5.71217	1.11542e-08	3.48194e-07	994.136	348.101	501.984	126.328	136.692	142.764	614.74	135.261
7432	ENSMUSG00000035439	Haus8	76478	4HAUS augmin-like complex, subunit 8 [Source:MGI Symbol;Acc:MGI:1923728]	31.9268	1.54801	0.569591	2.71776	0.00657247	0.0280385	77.8697	27.5131	37.423	18.9492	8.54326	21.2628	47.6019	16.2517
7455	ENSMUSG00000035539	Ccdc180	381522	coiled-coil domain containing 180 [Source:MGI Symbol;Acc:MGI:2685871]	19.9468	8.12684	1.49952	5.41962	5.97254e-08	1.52569e-06	24.6587	5.98112	89.0409	0	0	0	39.8936	0
7472	ENSMUSG00000035621	Midn	59090	midnolin [Source:MGI Symbol;Acc:MGI:1890222]	1225.16	2.46553	0.306119	8.05418	8.00157e-16	8.50817e-14	2735.82	1455.8	2032.45	389.248	455.123	282.491	2074.69	375.621
7492	ENSMUSG00000035725	Prkx	19108	protein kinase, X-linked [Source:MGI Symbol;Acc:MGI:1309999]	181.608	1.62092	0.372512	4.35132	1.35318e-05	0.000172189	430.879	190.199	201.31	92.3772	78.4426	96.4419	274.129	89.0873
7513	ENSMUSG00000035828	Pim3	223775	proviral integration site 3 [Source:MGI Symbol;Acc:MGI:1355297]	3370.77	3.04612	0.399199	7.63058	2.33704e-14	1.95862e-12	5770.14	8675.01	3595.19	1020.1	751.807	412.346	6013.45	728.083
7515	ENSMUSG00000035835	Plppr3	216152	phospholipid phosphatase related 3 [Source:MGI Symbol;Acc:MGI:2388640]	24.8579	1.46751	0.529648	2.77072	0.00559327	0.0245887	37.637	20.3358	51.6179	12.6328	15.5332	11.3908	36.5302	13.1856
7521	ENSMUSG00000035851	Ythdc1	231386	YTH domain containing 1 [Source:MGI Symbol;Acc:MGI:2443713]	1024.26	1.81474	0.291814	6.21882	5.00923e-10	2.07858e-08	1951.93	1020.38	1813.08	510.838	424.056	425.256	1595.13	453.383
7538	ENSMUSG00000035929	H2-Q4	15015	histocompatibility 2, Q region locus 4 [Source:MGI Symbol;Acc:MGI:95933]	220.316	1.25232	0.345193	3.62789	0.000285748	0.00219875	464.622	220.105	246.475	112.116	131.255	147.321	310.401	130.231
7545	ENSMUSG00000035949	Fbxw2	30050	F-box and WD-40 domain protein 2 [Source:MGI Symbol;Acc:MGI:1353435]	712.343	1.01008	0.227988	4.43038	9.40659e-06	0.00012621	978.562	753.621	1123.98	480.046	478.422	459.428	952.054	472.632
7551	ENSMUSG00000035969	Rusc2	100213	RUN and SH3 domain containing 2 [Source:MGI Symbol;Acc:MGI:2140371]	714.658	1.58398	0.296276	5.3463	8.9771e-08	2.18807e-06	1469.14	764.387	982.03	363.982	302.897	405.512	1071.85	357.464
7553	ENSMUSG00000036002	Fam214b	230088	family with sequence similarity 214, member B [Source:MGI Symbol;Acc:MGI:2441854]	283.898	1.01728	0.234895	4.3308	1.48566e-05	0.000186397	406.22	314.607	419.395	205.283	180.185	177.696	380.074	187.721
7563	ENSMUSG00000036046	5031439G07Rik	223739	RIKEN cDNA 5031439G07 gene [Source:MGI Symbol;Acc:MGI:2444899]	644.115	1.4984	0.316626	4.73238	2.21902e-06	3.63278e-05	1120.03	605.289	1129.14	424.777	306.004	279.454	951.485	336.745
7567	ENSMUSG00000036057	Ptpn23	104831	protein tyrosine phosphatase, non-receptor type 23 [Source:MGI Symbol;Acc:MGI:2144837]	490.685	2.07957	0.443118	4.69304	2.69181e-06	4.26801e-05	1379.59	344.512	656.838	157.91	193.388	211.868	793.647	187.722
7579	ENSMUSG00000036103	Colec12	140792	collectin sub-family member 12 [Source:MGI Symbol;Acc:MGI:2152907]	2080.36	2.40114	0.395408	6.07257	1.25882e-09	4.80188e-08	4121.9	1459.39	4914.02	687.697	640.744	658.387	3498.44	662.276
7592	ENSMUSG00000036160	Surf6	20935	surfeit gene 6 [Source:MGI Symbol;Acc:MGI:98447]	216.431	1.20134	0.345577	3.47632	0.000508346	0.00358412	380.264	167.471	357.454	125.538	127.372	140.486	301.73	131.132
7596	ENSMUSG00000036181	Hist1h1c	50708	histone cluster 1, H1c [Source:MGI Symbol;Acc:MGI:1931526]	532.653	1.67133	0.410227	4.07416	4.61806e-05	0.000490431	621.66	1161.53	649.095	147.646	210.475	405.512	810.762	254.544
7640	ENSMUSG00000036376	Abt1	30946	activator of basal transcription 1 [Source:MGI Symbol;Acc:MGI:1353636]	158.548	1.10111	0.37282	2.95347	0.00314226	0.0156661	223.226	116.034	309.707	101.062	103.296	97.9607	216.322	100.773
7642	ENSMUSG00000036390	Gadd45a	13197	growth arrest and DNA-damage-inducible 45 alpha [Source:MGI Symbol;Acc:MGI:107799]	3481.32	6.72345	0.460322	14.606	2.57226e-48	2.57422e-45	11454.6	5546.89	3690.68	50.5311	41.163	104.036	6897.4	65.2433
7645	ENSMUSG00000036402	Gng12	14701	guanine nucleotide binding protein (G protein), gamma 12 [Source:MGI Symbol;Acc:MGI:1336171]	1045.94	1.15473	0.314244	3.67464	0.000238184	0.001883	2075.23	919.896	1335.61	610.321	698.217	636.365	1443.58	648.301
7653	ENSMUSG00000036446	Lum	17022	lumican [Source:MGI Symbol;Acc:MGI:109347]	152.31	1.09271	0.305706	3.57439	0.000351042	0.00261598	259.566	212.928	149.692	81.3236	102.519	107.833	207.395	97.2251
7661	ENSMUSG00000036478	Btg1	12226	B cell translocation gene 1, anti-proliferative [Source:MGI Symbol;Acc:MGI:88215]	3490.73	3.49726	0.391203	8.93974	3.90086e-19	6.14493e-17	10683.7	3262.1	5294.71	579.529	530.459	593.839	6413.51	567.942
7700	ENSMUSG00000036655	Colec11	71693	collectin sub-family member 11 [Source:MGI Symbol;Acc:MGI:1918943]	229.792	1.10348	0.295583	3.73323	0.000189038	0.00155143	346.52	283.505	310.998	116.853	121.159	199.718	313.674	145.91
7719	ENSMUSG00000036752	Tubb4b	227613	tubulin, beta 4B class IVB [Source:MGI Symbol;Acc:MGI:1915472]	756.699	1.01371	0.396158	2.55886	0.0105016	0.0406701	1157.66	459.35	1419.49	505.311	605.018	393.362	1012.17	501.23
7792	ENSMUSG00000037003	Tns2	209039	tensin 2 [Source:MGI Symbol;Acc:MGI:2387586]	1141.68	1.19734	0.188436	6.35408	2.09677e-10	9.43715e-09	1672.9	1571.84	1525.31	690.855	625.988	763.182	1590.02	693.342
7802	ENSMUSG00000037035	Inhbb	16324	inhibin beta-B [Source:MGI Symbol;Acc:MGI:96571]	223.29	3.81616	0.437956	8.71358	2.94418e-18	4.17411e-16	620.362	252.403	378.101	45.7938	24.8531	18.2252	416.955	29.6241
7819	ENSMUSG00000037111	Setd7	73251	SET domain containing (lysine methyltransferase) 7 [Source:MGI Symbol;Acc:MGI:1920501]	301.266	1.06682	0.308275	3.46061	0.000538944	0.00376552	403.624	287.094	532.955	208.441	152.225	223.259	407.891	194.642
7851	ENSMUSG00000037242	Clic4	29876	chloride intracellular channel 4 (mitochondrial) [Source:MGI Symbol;Acc:MGI:1352754]	2335.1	1.9723	0.378228	5.21457	1.84247e-07	4.11904e-06	5828.55	1857.73	3479.05	836.133	1016.65	992.516	3721.78	948.432
7855	ENSMUSG00000037254	Itih2	16425	inter-alpha trypsin inhibitor, heavy chain 2 [Source:MGI Symbol;Acc:MGI:96619]	21115.1	1.26398	0.254178	4.97284	6.59808e-07	1.26411e-05	39665.5	22815.6	26965.2	12480.4	12418	12346.1	29815.4	12414.8
7859	ENSMUSG00000037262	Kin	16588	Kin17 DNA and RNA binding protein [Source:MGI Symbol;Acc:MGI:96676]	403.904	1.82891	0.332795	5.49561	3.89367e-08	1.04649e-06	850.077	363.652	677.485	191.071	178.632	162.508	630.405	177.404
7880	ENSMUSG00000037339	Fam53a	74504	family with sequence similarity 53, member A [Source:MGI Symbol;Acc:MGI:1919225]	258.81	1.00545	0.366123	2.74619	0.00602914	0.0261201	347.818	183.022	505.855	174.49	168.535	173.14	345.565	172.055
7903	ENSMUSG00000037405	Icam1	15894	intercellular adhesion molecule 1 [Source:MGI Symbol;Acc:MGI:96392]	224.741	1.59878	0.600689	2.66157	0.00777769	0.0320702	743.655	157.901	112.269	80.534	122.712	131.374	337.942	111.54
7907	ENSMUSG00000037411	Serpine1	18787	serine (or cysteine) peptidase inhibitor, clade E, member 1 [Source:MGI Symbol;Acc:MGI:97608]	230.357	4.05137	0.522152	7.75899	8.56081e-15	7.66553e-13	665.786	193.788	443.914	27.6342	40.3863	10.6314	434.496	26.2173
7910	ENSMUSG00000037418	Best1	24115	bestrophin 1 [Source:MGI Symbol;Acc:MGI:1346332]	4.53593	4.04987	1.46194	2.77021	0.00560197	0.0246206	10.3826	2.39245	12.9045	0	0.77666	0.759385	8.55985	0.512015
7917	ENSMUSG00000037447	Arid5a	214855	AT rich interactive domain 5A (MRF1-like) [Source:MGI Symbol;Acc:MGI:2443039]	525.412	5.92313	0.406206	14.5816	3.67862e-48	3.4769e-45	1258.89	527.534	1314.97	16.5805	14.7565	19.744	1033.8	17.027
7921	ENSMUSG00000037465	Klf10	21847	Kruppel-like factor 10 [Source:MGI Symbol;Acc:MGI:1101353]	679.688	1.89828	0.32951	5.76091	8.36592e-09	2.70796e-07	1392.57	610.074	1213.02	249.498	313.771	299.198	1071.89	287.489
7937	ENSMUSG00000037536	Fbxo34	78938	F-box protein 34 [Source:MGI Symbol;Acc:MGI:1926188]	422.797	1.24554	0.287286	4.33552	1.45414e-05	0.000183526	641.127	393.557	749.75	241.602	258.628	252.116	594.811	250.782
7954	ENSMUSG00000037608	Bclaf1	72567	BCL2-associated transcription factor 1 [Source:MGI Symbol;Acc:MGI:1917580]	1696.12	1.13759	0.244828	4.6465	3.3762e-06	5.17057e-05	2625.51	1746.49	2624.77	1181.17	1063.25	935.563	2332.25	1059.99
7955	ENSMUSG00000037613	Tnfrsf23	79201	tumor necrosis factor receptor superfamily, member 23 [Source:MGI Symbol;Acc:MGI:1930269]	27.3826	2.38213	0.787171	3.02618	0.00247661	0.0129406	46.7218	5.98112	85.1695	9.47459	10.8732	6.07508	45.9575	8.80764
7998	ENSMUSG00000037788	Vopp1	232023	vesicular, overexpressed in cancer, prosurvival protein 1 [Source:MGI Symbol;Acc:MGI:2141658]	68.1109	1.28179	0.322969	3.96875	7.225e-05	0.000711336	94.7414	98.0903	96.7835	34.7402	34.9497	49.36	96.5384	39.6833
8003	ENSMUSG00000037805	Rpl10a	19896	ribosomal protein L10A [Source:MGI Symbol;Acc:MGI:1343877]	3100.76	1.13305	0.222493	5.09253	3.53321e-07	7.30382e-06	4578.74	3338.66	4861.12	1797.01	1968.06	2060.97	4259.5	1942.01
8008	ENSMUSG00000037820	Tgm2	21817	transglutaminase 2, C polypeptide [Source:MGI Symbol;Acc:MGI:98731]	4005.2	3.21447	0.482918	6.65635	2.80703e-11	1.4831e-09	11352.1	2141.24	8200.79	600.057	833.356	903.668	7231.38	779.027
8015	ENSMUSG00000037852	Cpe	12876	carboxypeptidase E [Source:MGI Symbol;Acc:MGI:101932]	37.7041	2.14031	0.446373	4.79489	1.62763e-06	2.79707e-05	41.5305	70.5772	72.265	15.791	10.8732	15.1877	61.4576	13.9506
8018	ENSMUSG00000037868	Egr2	13654	early growth response 2 [Source:MGI Symbol;Acc:MGI:95296]	5.78435	6.34467	1.6787	3.77952	0.000157131	0.00134053	14.2761	19.1396	1.29045	0	0	0	11.5687	0
8020	ENSMUSG00000037876	Jmjd1c	108829	jumonji domain containing 1C [Source:MGI Symbol;Acc:MGI:1918614]	2400.77	2.39698	0.408124	5.87318	4.27521e-09	1.47235e-07	6570.9	1778.78	3756.49	847.186	719.187	732.047	4035.39	766.14
8022	ENSMUSG00000037887	Dusp8	18218	dual specificity phosphatase 8 [Source:MGI Symbol;Acc:MGI:106626]	202.669	3.80209	0.486692	7.81211	5.62376e-15	5.19984e-13	388.051	137.566	609.091	27.6342	23.2998	30.3754	378.236	27.1031
8059	ENSMUSG00000038007	Acer2	230379	alkaline ceramidase 2 [Source:MGI Symbol;Acc:MGI:1920932]	485.494	1.03882	0.254167	4.08715	4.36696e-05	0.000467265	816.334	526.338	616.834	298.45	292.024	362.986	653.169	317.82
8077	ENSMUSG00000038059	Smim3	106878	small integral membrane protein 3 [Source:MGI Symbol;Acc:MGI:1917088]	14.5285	2.49149	0.768905	3.2403	0.00119402	0.00720096	41.5305	13.1585	19.3567	4.73729	1.55332	6.83447	24.6819	4.37503
8102	ENSMUSG00000038150	Ormdl3	66612	ORM1-like 3 (S. cerevisiae) [Source:MGI Symbol;Acc:MGI:1913862]	1755.61	2.0913	0.282243	7.40956	1.26723e-13	9.45587e-12	3470.39	1832.61	3228.7	622.954	681.131	697.875	2843.9	667.32
8105	ENSMUSG00000038156	Spon1	233744	spondin 1, (f-spondin) extracellular matrix protein [Source:MGI Symbol;Acc:MGI:2385287]	19.7483	2.27319	0.706472	3.21766	0.00129242	0.00768001	53.2109	19.1396	25.8089	12.6328	4.65996	3.03754	32.7198	6.77676
8150	ENSMUSG00000038295	Atg9b	213948	autophagy related 9B [Source:MGI Symbol;Acc:MGI:2685420]	9.55296	2.23548	0.877436	2.54775	0.0108421	0.0416947	3.89348	22.7282	20.6472	2.36865	3.8833	3.79693	15.7563	3.34962
8162	ENSMUSG00000038335	Tsr1	104662	TSR1 20S rRNA accumulation [Source:MGI Symbol;Acc:MGI:2144566]	328.361	1.25612	0.455565	2.75728	0.0058285	0.0254192	629.447	155.509	603.929	175.28	192.612	213.387	462.962	193.76
8163	ENSMUSG00000038342	Mlxip	208104	MLX interacting protein [Source:MGI Symbol;Acc:MGI:2141183]	194.52	1.12164	0.23475	4.77802	1.77031e-06	3.01484e-05	299.798	239.245	260.67	127.907	115.722	123.78	266.571	122.47
8183	ENSMUSG00000038393	Txnip	56338	thioredoxin interacting protein [Source:MGI Symbol;Acc:MGI:1889549]	8386.23	2.72627	0.376206	7.24674	4.26909e-13	3.00124e-11	12177.5	18650.3	12883.8	3519.02	1801.07	1285.64	14570.6	2201.91
8185	ENSMUSG00000038400	Pmepa1	65112	prostate transmembrane protein, androgen induced 1 [Source:MGI Symbol;Acc:MGI:1929600]	24.9286	1.71168	0.519863	3.29257	0.000992774	0.00619592	48.0196	22.7282	43.8752	12.6328	13.2032	9.11262	38.2077	11.6495
8188	ENSMUSG00000038412	Higd1a	56295	HIG1 domain family, member 1A [Source:MGI Symbol;Acc:MGI:1930666]	548.676	1.42161	0.289135	4.91678	8.79809e-07	1.62698e-05	724.188	581.364	1091.72	326.084	303.674	265.025	799.09	298.261
8189	ENSMUSG00000038415	Foxq1	15220	forkhead box Q1 [Source:MGI Symbol;Acc:MGI:1298228]	148.057	1.65341	0.437816	3.77649	0.000159055	0.00135098	293.309	95.6979	285.189	53.6893	78.4426	82.0136	224.732	71.3819
8192	ENSMUSG00000038418	Egr1	13653	early growth response 1 [Source:MGI Symbol;Acc:MGI:95295]	6280.03	5.98472	0.523805	11.4255	3.11967e-30	1.4743e-27	19786.7	13726.7	3580.99	294.502	123.489	167.824	12364.8	195.272
8200	ENSMUSG00000038459	Abhd17c	70178	abhydrolase domain containing 17C [Source:MGI Symbol;Acc:MGI:1917428]	1450.19	2.25229	0.30917	7.28495	3.21788e-13	2.30995e-11	3483.37	1675.91	2032.45	531.367	440.366	537.645	2397.24	503.126
8202	ENSMUSG00000038467	Chmp4b	75608	charged multivesicular body protein 4B [Source:MGI Symbol;Acc:MGI:1922858]	869.478	1.57628	0.31265	5.0417	4.61421e-07	9.16005e-06	1719.62	770.368	1416.91	431.883	454.346	423.737	1302.3	436.655
8215	ENSMUSG00000038508	Gdf15	23886	growth differentiation factor 15 [Source:MGI Symbol;Acc:MGI:1346047]	3004.65	5.7397	0.506891	11.3233	1.0057e-29	4.5026e-27	9114.65	5137.78	3444.2	210.02	57.4728	63.7884	5898.88	110.427
8234	ENSMUSG00000038542	Pcid2	234069	PCI domain containing 2 [Source:MGI Symbol;Acc:MGI:2443003]	228.286	1.32353	0.366153	3.61469	0.000300706	0.00229874	414.007	168.667	396.167	123.17	120.382	147.321	326.281	130.291
8238	ENSMUSG00000038546	Ranbp9	56705	RAN binding protein 9 [Source:MGI Symbol;Acc:MGI:1928741]	730.282	1.00807	0.264922	3.80517	0.000141709	0.00123509	1270.57	714.145	942.027	506.101	460.559	488.285	975.582	484.982
8247	ENSMUSG00000038583	Pln	18821	phospholamban [Source:MGI Symbol;Acc:MGI:97622]	66.1392	3.90786	0.473971	8.24494	1.65248e-16	1.89958e-14	160.931	137.566	73.5555	6.31639	10.8732	7.59385	124.017	8.26116
8248	ENSMUSG00000038587	Akap12	83397	A kinase (PRKA) anchor protein (gravin) 12 [Source:MGI Symbol;Acc:MGI:1932576]	179.671	2.66979	0.478779	5.57625	2.45758e-08	7.03886e-07	577.533	156.705	197.438	48.1625	44.2696	53.9163	310.559	48.7828
8251	ENSMUSG00000038594	Cep85l	100038725	centrosomal protein 85-like [Source:MGI Symbol;Acc:MGI:3642684]	2945.5	2.22238	0.33329	6.66799	2.59336e-11	1.37877e-09	6953.76	2771.65	4828.85	1109.32	1095.87	913.54	4851.42	1039.57
8259	ENSMUSG00000038612	Mcl1	17210	myeloid cell leukemia sequence 1 [Source:MGI Symbol;Acc:MGI:101769]	2375.11	1.57199	0.316899	4.96053	7.02998e-07	1.33483e-05	5305.52	2400.82	2957.71	1154.32	1297.8	1134.52	3554.68	1195.55
8299	ENSMUSG00000038742	Angptl6	70726	angiopoietin-like 6 [Source:MGI Symbol;Acc:MGI:1917976]	39.0236	1.25974	0.403461	3.12232	0.00179432	0.0100516	48.0196	52.6338	64.5224	18.9492	29.5131	20.5034	55.0586	22.9885
8302	ENSMUSG00000038754	Elovl3	12686	elongation of very long chain fatty acids (FEN1/Elo2, SUR4/Elo3, yeast)-like 3 [Source:MGI Symbol;Acc:MGI:1195976]	2541.77	3.18577	0.28796	11.0632	1.8919e-28	7.85044e-26	3729.96	5711.97	4298.48	673.485	438.813	397.918	4580.13	503.405
8319	ENSMUSG00000038806	Sde2	208768	SDE2 telomere maintenance homolog (S. pombe) [Source:MGI Symbol;Acc:MGI:2384788]	404.032	1.38177	0.379314	3.64281	0.000269673	0.00209304	746.251	271.543	734.265	202.914	235.328	233.891	584.019	224.044
8335	ENSMUSG00000038859	Baiap2l1	66898	BAI1-associated protein 2-like 1 [Source:MGI Symbol;Acc:MGI:1914148]	1294.55	1.70067	0.288525	5.89435	3.76154e-09	1.32221e-07	2552.83	1313.45	2073.75	686.118	606.571	534.607	1980.01	609.099
8349	ENSMUSG00000038900	Rpl12	269261	ribosomal protein L12 [Source:MGI Symbol;Acc:MGI:98002]	2735.68	1.01192	0.243751	4.15148	3.30336e-05	0.000369009	3959.67	2754.9	4258.48	1565.68	1920.68	1954.66	3657.68	1813.67
8355	ENSMUSG00000038917	3930402G23Rik		RIKEN cDNA 3930402G23 gene [Source:MGI Symbol;Acc:MGI:1921277]	7.94352	2.19787	0.799077	2.75051	0.00595026	0.025864	12.9783	11.9622	14.1949	3.1582	2.32998	3.03754	13.0451	2.84191
8365	ENSMUSG00000038975	Rabggtb	19352	Rab geranylgeranyl transferase, b subunit [Source:MGI Symbol;Acc:MGI:99537]	847.549	1.51287	0.260713	5.80284	6.52012e-09	2.14974e-07	1624.88	965.352	1175.6	490.31	405.416	423.737	1255.28	439.821
8380	ENSMUSG00000039041	Adrm1	56436	adhesion regulating molecule 1 [Source:MGI Symbol;Acc:MGI:1929289]	871.985	1.01502	0.238594	4.25416	2.09838e-05	0.000251406	1291.34	889.99	1318.84	630.85	570.845	530.051	1166.72	577.248
8389	ENSMUSG00000039067	Psmd7	17463	proteasome (prosome, macropain) 26S subunit, non-ATPase, 7 [Source:MGI Symbol;Acc:MGI:1351511]	996.68	1.19548	0.284475	4.20242	2.64076e-05	0.000305628	1536.63	917.503	1708.55	637.956	653.947	525.495	1387.56	605.799
8442	ENSMUSG00000039219	Arid4b	94246	AT rich interactive domain 4B (RBP1-like) [Source:MGI Symbol;Acc:MGI:2137512]	727.806	1.0897	0.317353	3.43372	0.000595367	0.00407277	1470.44	706.968	793.625	511.628	455.123	429.053	990.344	465.268
8444	ENSMUSG00000039221	Rpl22l1	68028	ribosomal protein L22 like 1 [Source:MGI Symbol;Acc:MGI:1915278]	373.45	1.03652	0.24174	4.28773	1.80512e-05	0.000220216	563.257	393.557	549.731	222.653	258.628	252.875	502.182	244.719
8447	ENSMUSG00000039232	Stx11	74732	syntaxin 11 [Source:MGI Symbol;Acc:MGI:1921982]	13.8102	2.12373	0.726971	2.92134	0.00348531	0.0169615	31.1479	14.3547	21.9376	1.5791	7.7666	6.07508	22.4801	5.14026
8480	ENSMUSG00000039361	Picalm	233489	phosphatidylinositol binding clathrin assembly protein [Source:MGI Symbol;Acc:MGI:2385902]	4650.7	1.84592	0.278791	6.62118	3.5635e-11	1.854e-09	9448.19	4815.99	7567.18	2159.42	1926.12	1987.31	7277.12	2024.28
8484	ENSMUSG00000039384	Dusp10	63953	dual specificity phosphatase 10 [Source:MGI Symbol;Acc:MGI:1927070]	289.578	4.17412	0.526292	7.93117	2.17083e-15	2.14722e-13	859.162	163.883	623.286	19.7387	34.9497	36.4505	548.777	30.3796
8513	ENSMUSG00000039519	Cyp7b1	13123	cytochrome P450, family 7, subfamily b, polypeptide 1 [Source:MGI Symbol;Acc:MGI:104978]	7736.89	1.40547	0.343047	4.09701	4.18525e-05	0.000451513	12576	14412.1	6711.62	5754.23	3384.68	3582.78	11233.2	4240.57
8521	ENSMUSG00000039568	Ubald1	207740	UBA-like domain containing 1 [Source:MGI Symbol;Acc:MGI:1916255]	481.962	2.47521	0.344972	7.17512	7.22454e-13	4.8363e-11	1227.75	589.738	633.61	130.276	128.149	182.252	817.031	146.892
8577	ENSMUSG00000039782	Cpeb2	231207	cytoplasmic polyadenylation element binding protein 2 [Source:MGI Symbol;Acc:MGI:2442640]	980.931	1.31652	0.34094	3.86143	0.000112727	0.00103133	842.29	2089.8	1267.22	607.953	477.646	600.674	1399.77	562.091
8605	ENSMUSG00000039899	Fgl2	14190	fibrinogen-like protein 2 [Source:MGI Symbol;Acc:MGI:103266]	71.4445	1.59394	0.357367	4.46022	8.18738e-06	0.000111881	132.378	98.0903	91.6218	27.6342	32.6197	46.3225	107.364	35.5255
8607	ENSMUSG00000039903	Eva1c	70967	eva-1 homolog C (C. elegans) [Source:MGI Symbol;Acc:MGI:1918217]	9.63286	2.10497	0.765921	2.74828	0.00599086	0.0260073	14.2761	11.9622	20.6472	5.52684	3.10664	2.27816	15.6285	3.63721
8610	ENSMUSG00000039911	Spsb1	74646	splA/ryanodine receptor domain and SOCS box containing 1 [Source:MGI Symbol;Acc:MGI:1921896]	55.0183	3.08586	0.425698	7.24895	4.20018e-13	2.96505e-11	88.2523	123.211	83.8791	11.0537	7.7666	15.9471	98.4475	11.5891
8620	ENSMUSG00000039956	Mrap	77037	melanocortin 2 receptor accessory protein [Source:MGI Symbol;Acc:MGI:1924287]	2681.64	4.45649	0.45612	9.77044	1.50801e-22	3.37576e-20	8150.36	1714.19	5524.4	226.601	259.404	214.906	5129.65	233.637
8623	ENSMUSG00000039960	Rhou	69581	ras homolog family member U [Source:MGI Symbol;Acc:MGI:1916831]	1602	2.27892	0.22773	10.0071	1.41856e-23	3.83078e-21	2839.65	2055.11	3075.14	555.843	562.302	523.976	2656.63	547.373
8646	ENSMUSG00000040028	Elavl1	15568	ELAV (embryonic lethal, abnormal vision)-like 1 (Hu antigen R) [Source:MGI Symbol;Acc:MGI:1100851]	717.236	1.23523	0.290793	4.24779	2.15889e-05	0.000257523	1353.63	675.866	991.064	462.676	411.63	408.549	1006.85	427.618
8668	ENSMUSG00000040128	Pnrc1	108767	proline-rich nuclear receptor coactivator 1 [Source:MGI Symbol;Acc:MGI:1917838]	744.235	1.19898	0.464159	2.58312	0.00979123	0.0384707	1954.53	460.546	695.551	501.364	403.863	449.556	1036.88	451.594
8674	ENSMUSG00000040152	Thbs1	21825	thrombospondin 1 [Source:MGI Symbol;Acc:MGI:98737]	97.8302	3.13235	0.622253	5.03389	4.80631e-07	9.50811e-06	214.142	257.188	55.4892	37.8984	10.8732	11.3908	175.606	20.0541
8698	ENSMUSG00000040260	Daam2	76441	dishevelled associated activator of morphogenesis 2 [Source:MGI Symbol;Acc:MGI:1923691]	49.6883	1.65061	0.436307	3.78315	0.000154857	0.00132578	112.911	52.6338	60.651	22.1074	20.9698	28.8566	75.3986	23.9779
8711	ENSMUSG00000040297	Suco	226551	SUN domain containing ossification factor [Source:MGI Symbol;Acc:MGI:2138346]	1131.2	2.00674	0.296363	6.7712	1.2772e-11	7.14767e-10	2053.16	1119.66	2262.15	429.515	447.356	475.375	1811.66	450.749
8748	ENSMUSG00000040435	Ppp1r15a	17872	protein phosphatase 1, regulatory (inhibitor) subunit 15A [Source:MGI Symbol;Acc:MGI:1927072]	815.893	3.40407	0.420673	8.09197	5.87091e-16	6.28187e-14	2167.37	580.168	1725.33	145.277	138.245	138.967	1490.96	140.83
8752	ENSMUSG00000040451	Sgms1	208449	sphingomyelin synthase 1 [Source:MGI Symbol;Acc:MGI:2444110]	962.833	3.13018	0.427427	7.32331	2.41925e-13	1.77408e-11	2467.17	638.783	2078.91	197.387	198.825	195.921	1728.29	197.378
8761	ENSMUSG00000040473	Cfap69	207686	cilia and flagella associated protein 69 [Source:MGI Symbol;Acc:MGI:2443778]	16.6447	3.91562	0.748587	5.23068	1.68889e-07	3.84133e-06	42.8283	26.3169	24.5185	1.5791	3.10664	1.51877	31.2212	2.06817
8770	ENSMUSG00000040511	Pvr	52118	poliovirus receptor [Source:MGI Symbol;Acc:MGI:107741]	648.477	3.73462	0.46408	8.04736	8.46012e-16	8.93987e-14	1458.76	392.361	1767.91	90.7981	81.5493	99.4795	1206.34	90.609
8799	ENSMUSG00000040606	Kazn	71529	kazrin, periplakin interacting protein [Source:MGI Symbol;Acc:MGI:1918779]	27.9066	1.27563	0.503402	2.53402	0.0112761	0.0428982	42.8283	21.532	54.1988	18.1596	15.5332	15.1877	39.5197	16.2935
8801	ENSMUSG00000040613	Apobec1	11810	apolipoprotein B mRNA editing enzyme, catalytic polypeptide 1 [Source:MGI Symbol;Acc:MGI:103298]	429.993	1.6639	0.532683	3.12361	0.00178645	0.0100174	1365.31	315.803	280.027	182.386	229.115	207.312	653.715	206.271
8813	ENSMUSG00000040659	Efhd2	27984	EF hand domain containing 2 [Source:MGI Symbol;Acc:MGI:106504]	1237.33	1.71744	0.397179	4.32409	1.53162e-05	0.000191458	3205.63	1023.97	1463.37	499.785	660.937	570.298	1897.66	577.007
8815	ENSMUSG00000040661	Rad54l2	81000	RAD54 like 2 (S. cerevisiae) [Source:MGI Symbol;Acc:MGI:1933196]	1157.71	1.46631	0.324948	4.51244	6.40847e-06	9.08251e-05	2362.05	980.903	1757.59	600.057	660.937	584.727	1700.18	615.24
8816	ENSMUSG00000040663	Clcf1	56708	cardiotrophin-like cytokine factor 1 [Source:MGI Symbol;Acc:MGI:1930088]	24.3559	2.582	0.620185	4.16327	3.13726e-05	0.000352771	55.8066	19.1396	50.3274	3.94775	9.31992	7.59385	41.7579	6.95384
8857	ENSMUSG00000040809	Chil3	12655	chitinase-like 3 [Source:MGI Symbol;Acc:MGI:1330860]	11.3951	3.14736	1.19609	2.63137	0.00850421	0.03435	20.7652	40.6716	0	0.789549	3.10664	3.03754	20.4789	2.31124
8898	ENSMUSG00000040997	Abhd4	105501	abhydrolase domain containing 4 [Source:MGI Symbol;Acc:MGI:1915938]	595.103	1.23423	0.255511	4.83046	1.36218e-06	2.39161e-05	901.99	626.821	976.869	385.3	375.127	304.513	835.227	354.98
8899	ENSMUSG00000040998	Npnt	114249	nephronectin [Source:MGI Symbol;Acc:MGI:2148811]	15.1079	2.76477	0.699239	3.95397	7.68641e-05	0.00074725	31.1479	14.3547	33.5516	3.94775	2.32998	5.3157	26.3514	3.86447
8902	ENSMUSG00000041025	Iffo2	212632	intermediate filament family orphan 2 [Source:MGI Symbol;Acc:MGI:2140675]	291.345	1.24411	0.47492	2.61962	0.00880277	0.0353378	417.901	135.173	676.194	181.596	172.418	164.787	409.756	172.934
8908	ENSMUSG00000041057	Wdr43	72515	WD repeat domain 43 [Source:MGI Symbol;Acc:MGI:1919765]	872.045	1.49761	0.421543	3.55269	0.000381316	0.00279988	1569.07	501.218	1793.72	542.42	392.99	432.85	1288	456.087
8913	ENSMUSG00000041096	Tspyl2	52808	TSPY-like 2 [Source:MGI Symbol;Acc:MGI:106244]	152.624	1.02096	0.307208	3.32335	0.000889429	0.00565254	259.566	174.649	179.372	83.6922	91.6458	126.817	204.529	100.718
8918	ENSMUSG00000041120	Nbl1	17965	neuroblastoma, suppression of tumorigenicity 1 [Source:MGI Symbol;Acc:MGI:104591]	24.559	2.00672	0.544399	3.68612	0.000227695	0.00182124	38.9348	27.5131	51.6179	6.31639	8.54326	14.4283	39.3553	9.76266
8932	ENSMUSG00000041180	Hectd2	226098	HECT domain E3 ubiquitin protein ligase 2 [Source:MGI Symbol;Acc:MGI:2442663]	169.386	3.34228	0.348647	9.58641	9.12011e-22	1.8922e-19	336.137	221.301	367.777	20.5283	31.843	38.7286	308.405	30.3667
8945	ENSMUSG00000041238	Rbbp8	225182	retinoblastoma binding protein 8, endonuclease [Source:MGI Symbol;Acc:MGI:2442995]	306.338	1.15998	0.448734	2.585	0.00973798	0.0383323	637.234	209.339	423.267	217.916	247.754	102.517	423.28	189.396
8958	ENSMUSG00000041308	Sntb2	20650	syntrophin, basic 2 [Source:MGI Symbol;Acc:MGI:101771]	564.061	1.92255	0.432583	4.44436	8.81555e-06	0.0001196	1506.78	415.089	756.202	176.069	281.151	249.078	892.69	235.433
8959	ENSMUSG00000041313	Slc7a1	11987	solute carrier family 7 (cationic amino acid transporter, y+ system), member 1 [Source:MGI Symbol;Acc:MGI:88117]	51.3516	2.86873	0.53368	5.37538	7.64204e-08	1.88974e-06	109.018	39.4754	122.592	8.68504	10.8732	17.4659	90.3618	12.3414
8963	ENSMUSG00000041328	Pcf11	74737	PCF11 cleavage and polyadenylation factor subunit [Source:MGI Symbol;Acc:MGI:1919579]	836.24	1.09657	0.369485	2.96783	0.00299915	0.0150648	1352.34	533.516	1533.05	550.316	524.245	523.976	1139.63	532.846
8973	ENSMUSG00000041361	Myzap	102371	myocardial zonula adherens protein [Source:MGI Symbol;Acc:MGI:2142908]	49.9552	1.60226	0.402983	3.976	7.00837e-05	0.000694429	62.2957	74.1658	89.0409	25.2656	16.3099	32.6536	75.1675	24.743
8987	ENSMUSG00000041438	Utp4	21771	UTP4 small subunit processome component [Source:MGI Symbol;Acc:MGI:1096573]	450.065	1.16358	0.307315	3.78626	0.000152931	0.0013114	734.571	382.791	749.75	309.503	264.064	259.71	622.371	277.759
8991	ENSMUSG00000041449	Serpina3h		serine (or cysteine) peptidase inhibitor, clade A, member 3H [Source:MGI Symbol;Acc:MGI:2182839]	215.974	2.37424	0.325812	7.28714	3.16597e-13	2.28895e-11	507.451	318.195	260.67	80.534	63.6861	65.3071	362.105	69.8424
8997	ENSMUSG00000041481	Serpina3g	20715	serine (or cysteine) peptidase inhibitor, clade A, member 3G [Source:MGI Symbol;Acc:MGI:105046]	99.9408	2.21027	0.650911	3.39566	0.000684641	0.00456647	369.881	57.4187	65.8128	48.1625	29.5131	28.8566	164.371	35.5107
9000	ENSMUSG00000041488	Stx3	20908	syntaxin 3 [Source:MGI Symbol;Acc:MGI:103077]	161	1.25665	0.395118	3.18044	0.00147051	0.00852397	315.372	124.407	241.314	90.7981	123.489	70.6228	227.031	94.97
9002	ENSMUSG00000041506	Rrp9	27966	RRP9, small subunit (SSU) processome component, homolog (yeast) [Source:MGI Symbol;Acc:MGI:2384313]	100.051	1.1576	0.400739	2.88866	0.00386881	0.0183445	166.122	72.9696	175.501	73.4281	63.6861	48.6007	138.197	61.9049
9009	ENSMUSG00000041548	Hspb8	80888	heat shock protein 8 [Source:MGI Symbol;Acc:MGI:2135756]	9678.73	3.60568	0.270047	13.352	1.15287e-40	8.52772e-38	21908.6	12006.5	19749	1526.99	1543.22	1338.04	17888	1469.42
9011	ENSMUSG00000041559	Fmod	14264	fibromodulin [Source:MGI Symbol;Acc:MGI:1328364]	29.4322	1.86163	0.549446	3.3882	0.00070352	0.00467722	33.7435	29.9056	74.8459	17.3701	10.0966	10.6314	46.165	12.6993
9030	ENSMUSG00000041645	Ddx24	27225	DEAD (Asp-Glu-Ala-Asp) box polypeptide 24 [Source:MGI Symbol;Acc:MGI:1351337]	805.683	1.18825	0.285138	4.16728	3.08255e-05	0.000348462	1216.06	732.089	1411.75	517.155	453.569	503.472	1119.97	491.399
9034	ENSMUSG00000041671	Pyroxd1	232491	pyridine nucleotide-disulphide oxidoreductase domain 1 [Source:MGI Symbol;Acc:MGI:2676395]	160.231	1.4365	0.289025	4.97015	6.69016e-07	1.27887e-05	243.992	179.433	278.737	82.1131	76.1127	100.998	234.054	86.408
9054	ENSMUSG00000041747	Utp15	105372	UTP15 small subunit processome component [Source:MGI Symbol;Acc:MGI:2145443]	239.295	1.04118	0.303763	3.4276	0.000608943	0.00414067	382.859	209.339	374.23	140.54	170.088	158.712	322.143	156.447
9060	ENSMUSG00000041769	Ppp2r2d	52432	protein phosphatase 2, regulatory subunit B, delta [Source:MGI Symbol;Acc:MGI:1289252]	689.203	1.76899	0.204806	8.63738	5.75171e-18	7.89144e-16	1075.9	953.39	1167.85	337.137	319.207	281.732	1065.71	312.692
9061	ENSMUSG00000041773	Enc1	13803	ectodermal-neural cortex 1 [Source:MGI Symbol;Acc:MGI:109610]	162.36	1.80188	0.314119	5.73629	9.67708e-09	3.0771e-07	264.757	171.06	321.321	76.5863	66.0161	74.4197	252.379	72.3407
9079	ENSMUSG00000041845	Rhod	11854	ras homolog family member D [Source:MGI Symbol;Acc:MGI:108446]	188.626	1.38438	0.353952	3.91122	9.18295e-05	0.000864101	338.733	318.195	161.306	101.062	128.926	83.5324	272.745	104.507
9093	ENSMUSG00000041920	Slc16a6	104681	solute carrier family 16 (monocarboxylic acid transporters), member 6 [Source:MGI Symbol;Acc:MGI:2144585]	1018.93	4.33466	0.414497	10.4576	1.35191e-25	4.60002e-23	3230.29	1250.05	1344.65	67.1117	90.8692	130.614	1941.66	96.1984
9104	ENSMUSG00000041959	S100a10	20194	S100 calcium binding protein A10 (calpactin) [Source:MGI Symbol;Acc:MGI:1339468]	1155.35	2.45732	0.278113	8.83567	9.95e-19	1.48491e-16	2199.82	1395.99	2268.61	345.823	292.024	429.812	1954.81	355.886
9110	ENSMUSG00000041992	Rapgef5	217944	Rap guanine nucleotide exchange factor (GEF) 5 [Source:MGI Symbol;Acc:MGI:2444365]	288.936	1.05227	0.228486	4.60539	4.1169e-06	6.15472e-05	368.583	346.905	454.237	186.334	177.078	200.478	389.908	187.963
9118	ENSMUSG00000042041	2010003K11Rik	69861	RIKEN cDNA 2010003K11 gene [Source:MGI Symbol;Acc:MGI:1917111]	333.963	1.50415	0.38977	3.85907	0.000113818	0.00103828	512.642	362.456	606.51	87.64	246.201	188.328	493.869	174.056
9138	ENSMUSG00000042129	Rassf4	213391	Ras association (RalGDS/AF-6) domain family member 4 [Source:MGI Symbol;Acc:MGI:2386853]	558.626	2.80517	0.546946	5.12878	2.91619e-07	6.16312e-06	271.246	1113.68	1547.25	219.495	84.6559	115.427	977.392	139.859
9159	ENSMUSG00000042215	Bag2	213539	BCL2-associated athanogene 2 [Source:MGI Symbol;Acc:MGI:1891254]	28.3822	1.54779	0.564125	2.74371	0.00607492	0.026265	25.9566	28.7094	72.265	11.0537	18.6398	13.6689	42.3103	14.4542
9168	ENSMUSG00000042265	Trem1	58217	triggering receptor expressed on myeloid cells 1 [Source:MGI Symbol;Acc:MGI:1930005]	11.7196	3.37798	0.830502	4.06739	4.7542e-05	0.00050238	27.2544	22.7282	14.1949	0.789549	1.55332	3.79693	21.3925	2.0466
9189	ENSMUSG00000042348	Arl15	218639	ADP-ribosylation factor-like 15 [Source:MGI Symbol;Acc:MGI:2442308]	315.023	1.31534	0.339763	3.87136	0.000108232	0.000994204	642.425	308.626	397.458	145.277	168.535	227.816	449.503	180.543
9193	ENSMUSG00000042354	Gnl3	30877	guanine nucleotide binding protein-like 3 (nucleolar) [Source:MGI Symbol;Acc:MGI:1353651]	1004.99	1.33257	0.342652	3.88899	0.000100664	0.000937074	1548.31	770.368	1997.61	604.795	587.155	521.698	1438.76	571.216
9197	ENSMUSG00000042377	Fam83g	69640	family with sequence similarity 83, member G [Source:MGI Symbol;Acc:MGI:1916890]	90.8479	2.44737	0.525436	4.65778	3.19639e-06	4.93021e-05	210.248	47.8489	202.6	29.2133	22.5231	32.6536	153.566	28.13
9204	ENSMUSG00000042406	Atf4	11911	activating transcription factor 4 [Source:MGI Symbol;Acc:MGI:88096]	2139.56	1.72551	0.448925	3.84365	0.000121219	0.00109348	4014.18	1104.11	4738.52	1184.32	898.595	897.593	3285.61	993.504
9211	ENSMUSG00000042429	Adora1	11539	adenosine A1 receptor [Source:MGI Symbol;Acc:MGI:99401]	587.017	1.11278	0.277699	4.00715	6.14551e-05	0.000620865	600.894	1055.07	752.331	361.613	325.42	426.774	802.765	371.269
9231	ENSMUSG00000042507	Elmsan1	238317	ELM2 and Myb/SANT-like domain containing 1 [Source:MGI Symbol;Acc:MGI:2685106]	583.946	2.71114	0.265379	10.2161	1.67942e-24	5.01261e-22	1309.51	825.394	904.604	173.701	153.779	136.689	1013.17	154.723
9237	ENSMUSG00000042524	Sun2	223697	Sad1 and UNC84 domain containing 2 [Source:MGI Symbol;Acc:MGI:2443011]	1451.59	1.54354	0.243042	6.35094	2.14e-10	9.60627e-09	2092.1	1750.07	2642.84	859.819	653.947	710.785	2161.67	741.517
9257	ENSMUSG00000042608	Stk40	74178	serine/threonine kinase 40 [Source:MGI Symbol;Acc:MGI:1921428]	546.307	1.22535	0.409072	2.99544	0.00274049	0.0140222	1269.28	382.791	643.933	378.194	338.624	265.025	765.333	327.281
9259	ENSMUSG00000042622	Maff	17133	v-maf musculoaponeurotic fibrosarcoma oncogene family, protein F (avian) [Source:MGI Symbol;Acc:MGI:96910]	1954.18	4.47487	0.395299	11.3202	1.04202e-29	4.54562e-27	4503.46	2439.1	4277.83	270.815	100.966	132.892	3740.13	168.225
9273	ENSMUSG00000042677	Zc3h12a	230738	zinc finger CCCH type containing 12A [Source:MGI Symbol;Acc:MGI:2385891]	57.7653	2.09007	0.543941	3.84245	0.000121811	0.00109824	167.42	35.8867	77.4268	22.1074	20.9698	22.7816	93.5778	21.9529
9278	ENSMUSG00000042688	Mapk6	50772	mitogen-activated protein kinase 6 [Source:MGI Symbol;Acc:MGI:1354946]	1488.27	1.95541	0.328719	5.94858	2.70471e-09	9.68743e-08	2956.45	1288.33	2854.47	650.588	601.911	577.892	2366.42	610.131
9284	ENSMUSG00000042712	Tceal9	22381	transcription elongation factor A like 9 [Source:MGI Symbol;Acc:MGI:109567]	266.179	1.03069	0.257735	3.99902	6.36056e-05	0.000638797	436.07	343.316	292.932	165.805	159.992	198.959	357.439	174.919
9285	ENSMUSG00000042719	Naa25	231713	N(alpha)-acetyltransferase 25, NatB auxiliary subunit [Source:MGI Symbol;Acc:MGI:2442563]	505.079	1.08418	0.318414	3.40493	0.000661812	0.00444027	903.288	411.501	744.588	361.613	293.577	315.904	686.459	323.698
9292	ENSMUSG00000042745	Id1	15901	inhibitor of DNA binding 1 [Source:MGI Symbol;Acc:MGI:96396]	93.9991	3.10459	0.446568	6.95212	3.59847e-12	2.21014e-10	229.716	171.06	104.526	10.2641	26.4064	22.0222	168.434	19.5642
9302	ENSMUSG00000042807	Hecw2	329152	HECT, C2 and WW domain containing E3 ubiquitin protein ligase 2 [Source:MGI Symbol;Acc:MGI:2685817]	195.751	1.70119	0.352065	4.83202	1.35154e-06	2.37538e-05	425.688	191.396	281.318	72.6385	100.189	103.276	299.467	92.0347
9304	ENSMUSG00000042812	Foxf1	15227	forkhead box F1 [Source:MGI Symbol;Acc:MGI:1347470]	38.3195	2.13906	0.61858	3.45801	0.000544175	0.00378807	101.231	69.3809	16.7758	11.8432	13.9799	16.7065	62.4624	14.1765
9308	ENSMUSG00000042842	Serpinb6b	20708	serine (or cysteine) peptidase inhibitor, clade B, member 6b [Source:MGI Symbol;Acc:MGI:894688]	43.5641	1.7779	0.553905	3.20976	0.00132847	0.00785582	24.6587	70.5772	107.107	25.2656	16.3099	17.4659	67.4477	19.6804
9317	ENSMUSG00000042985	Upk3b	100647	uroplakin 3B [Source:MGI Symbol;Acc:MGI:2140882]	40.8844	1.22559	0.434096	2.82332	0.00475286	0.0215398	44.1261	49.0452	78.7173	22.1074	19.4165	31.8942	57.2962	24.4727
9334	ENSMUSG00000043091	Tuba1c	22146	tubulin, alpha 1C [Source:MGI Symbol;Acc:MGI:1095409]	632.464	1.70596	0.349108	4.88663	1.02574e-06	1.85799e-05	1144.68	527.534	1232.38	296.081	353.38	240.725	968.199	296.729
9353	ENSMUSG00000043284	Tmem11	216821	transmembrane protein 11 [Source:MGI Symbol;Acc:MGI:2144726]	240.429	1.20138	0.389015	3.08827	0.00201325	0.010985	446.453	160.294	398.748	172.911	132.032	132.133	335.165	145.692
9367	ENSMUSG00000043421	Hilpda	69573	hypoxia inducible lipid droplet associated [Source:MGI Symbol;Acc:MGI:1916823]	3139.5	9.44141	0.4325	21.8298	1.20828e-105	2.05564e-101	8516.35	3672.41	6621.29	7.10594	6.21328	13.6689	6270.01	8.99605
9416	ENSMUSG00000043953	Ccrl2	54199	chemokine (C-C motif) receptor-like 2 [Source:MGI Symbol;Acc:MGI:1920904]	25.0981	2.07713	0.722634	2.87439	0.00404812	0.0190205	83.061	16.7471	21.9376	15.0014	7.7666	6.07508	40.5819	9.61437
9442	ENSMUSG00000044134	Fam109a	231717	family with sequence similarity 109, member A [Source:MGI Symbol;Acc:MGI:2442708]	62.3845	1.09579	0.429785	2.54962	0.0107839	0.0415271	92.1458	44.2603	118.721	33.1611	43.4929	42.5256	85.0424	39.7265
9456	ENSMUSG00000044244	Il20rb	213208	interleukin 20 receptor beta [Source:MGI Symbol;Acc:MGI:2143266]	21.5465	2.44524	0.630276	3.87964	0.000104612	0.000965703	35.0414	23.9245	50.3274	3.1582	5.43662	11.3908	36.4311	6.66186
9462	ENSMUSG00000044285	Gm1821		predicted gene 1821 [Source:MGI Symbol;Acc:MGI:3037679]	1916.21	2.27697	0.377987	6.02394	1.70226e-09	6.32325e-08	4147.86	1777.59	3605.51	501.364	517.255	947.713	3176.99	655.444
9466	ENSMUSG00000044337	Ackr3	12778	atypical chemokine receptor 3 [Source:MGI Symbol;Acc:MGI:109562]	22.398	2.1399	0.631503	3.38859	0.000702533	0.00467431	64.8914	22.7282	21.9376	10.2641	6.21328	8.35324	36.5191	8.27688
9467	ENSMUSG00000044339	Alkbh2	231642	alkB homolog 2, alpha-ketoglutarate-dependent dioxygenase [Source:MGI Symbol;Acc:MGI:2141032]	37.2685	1.55616	0.495025	3.1436	0.00166883	0.00948924	33.7435	46.6527	86.46	23.6865	18.6398	14.4283	55.6187	18.9182
9489	ENSMUSG00000044471	Lncpint		long non-protein coding RNA, Trp53 induced transcript [Source:MGI Symbol;Acc:MGI:2673128]	86.7394	2.00883	0.365067	5.50264	3.74146e-08	1.0119e-06	173.909	142.351	100.655	24.476	37.2797	41.7662	138.971	34.5073
9497	ENSMUSG00000044534	Ackr2	59289	atypical chemokine receptor 2 [Source:MGI Symbol;Acc:MGI:1891697]	56.3041	1.78917	0.494433	3.61864	0.000296161	0.00226759	120.698	56.2225	85.1695	27.6342	11.6499	36.4505	87.3633	25.2449
9499	ENSMUSG00000044562	Rasip1	69903	Ras interacting protein 1 [Source:MGI Symbol;Acc:MGI:1917153]	36.0758	1.55401	0.406479	3.82309	0.000131787	0.00117015	64.8914	51.4376	45.1657	17.3701	17.0865	20.5034	53.8316	18.32
9509	ENSMUSG00000044645	Gm7334		predicted gene 7334 [Source:MGI Symbol;Acc:MGI:3647393]	7.07847	5.64457	1.44248	3.91311	9.11168e-05	0.000859296	9.0848	11.9622	20.6472	0	0.77666	0	13.8981	0.258887
9510	ENSMUSG00000044646	Zbtb7c	207259	zinc finger and BTB domain containing 7C [Source:MGI Symbol;Acc:MGI:2443302]	61.744	3.30709	0.644371	5.13227	2.86261e-07	6.06495e-06	228.418	69.3809	38.7134	8.68504	9.31992	15.9471	112.171	11.3173
9512	ENSMUSG00000044676	Zfp612	234725	zinc finger protein 612 [Source:MGI Symbol;Acc:MGI:2443465]	343.614	1.43943	0.366499	3.9275	8.58324e-05	0.000820539	421.794	319.392	765.235	176.859	146.789	231.612	502.14	185.087
9521	ENSMUSG00000044734	Serpinb1a	66222	serine (or cysteine) peptidase inhibitor, clade B, member 1a [Source:MGI Symbol;Acc:MGI:1913472]	13.4876	1.74503	0.677031	2.57747	0.00995272	0.0390151	31.1479	13.1585	18.0663	6.31639	3.8833	8.35324	20.7909	6.18431
9527	ENSMUSG00000044786	Zfp36	22695	zinc finger protein 36 [Source:MGI Symbol;Acc:MGI:99180]	5837.24	3.44165	0.447396	7.69263	1.44142e-14	1.25117e-12	14844.6	12669.2	4557.86	1393.55	991.794	566.501	10690.5	983.95
9534	ENSMUSG00000044813	Shb	230126	src homology 2 domain-containing transforming protein B [Source:MGI Symbol;Acc:MGI:98294]	941.613	2.01355	0.237779	8.46815	2.49312e-17	3.11879e-15	1771.54	1439.06	1317.55	446.885	355.71	318.942	1509.38	373.846
9545	ENSMUSG00000044916	1700029I15Rik	75641	RIKEN cDNA 1700029I15 gene [Source:MGI Symbol;Acc:MGI:1916742]	24.213	1.83589	0.724756	2.53311	0.0113054	0.0430001	14.2761	17.9433	81.2982	8.68504	13.2032	9.87201	37.8392	10.5868
9556	ENSMUSG00000045005	Fzd5	14367	frizzled class receptor 5 [Source:MGI Symbol;Acc:MGI:108571]	147.792	1.10798	0.444676	2.49167	0.0127146	0.0471989	280.331	77.7545	247.766	104.22	90.8692	85.8105	201.95	93.6334
9595	ENSMUSG00000045294	Insig1	231070	insulin induced gene 1 [Source:MGI Symbol;Acc:MGI:1916289]	12392.2	2.65111	0.265753	9.97586	1.94403e-23	5.16777e-21	25344	23240.2	15557.6	4141.97	3088	2981.35	21380.6	3403.77
9598	ENSMUSG00000045314	Sowahb	78088	sosondowah ankyrin repeat domain family member B [Source:MGI Symbol;Acc:MGI:1925338]	99.247	1.09812	0.410333	2.67615	0.00744722	0.031031	216.737	104.071	85.1695	56.058	59.0261	74.4197	135.326	63.168
9605	ENSMUSG00000045382	Cxcr4	12767	chemokine (C-X-C motif) receptor 4 [Source:MGI Symbol;Acc:MGI:109563]	17.6128	1.70534	0.61724	2.76285	0.00572988	0.025092	24.6587	40.6716	15.4854	11.0537	6.21328	7.59385	26.9386	8.28694
9610	ENSMUSG00000045414	1190002N15Rik	68861	RIKEN cDNA 1190002N15 gene [Source:MGI Symbol;Acc:MGI:1916111]	1266.03	1.31586	0.420947	3.12596	0.00177227	0.0099642	2643.68	720.126	2055.68	573.213	838.792	764.701	1806.49	725.569
9619	ENSMUSG00000045502	Hcar2	80885	hydroxycarboxylic acid receptor 2 [Source:MGI Symbol;Acc:MGI:1933383]	48.8295	5.72492	0.904022	6.33273	2.40865e-10	1.06437e-08	124.591	11.9622	150.982	2.36865	1.55332	1.51877	95.8453	1.81358
9622	ENSMUSG00000045538	Ddx28	71986	DEAD (Asp-Glu-Ala-Asp) box polypeptide 28 [Source:MGI Symbol;Acc:MGI:1919236]	255.347	1.40712	0.304387	4.62279	3.78613e-06	5.73584e-05	467.218	324.177	321.321	113.695	120.382	185.29	370.905	139.789
9633	ENSMUSG00000045664	Cdc42ep2	104252	CDC42 effector protein (Rho GTPase binding) 2 [Source:MGI Symbol;Acc:MGI:1929744]	41.7875	1.14214	0.395179	2.89018	0.00385021	0.0182716	68.7849	58.6149	45.1657	26.0551	20.9698	31.1348	57.5218	26.0532
9643	ENSMUSG00000045730	Adrb2	11555	adrenergic receptor, beta 2 [Source:MGI Symbol;Acc:MGI:87938]	60.5958	2.63196	0.42001	6.26643	3.69422e-10	1.58712e-08	127.187	64.5961	121.302	20.5283	15.5332	14.4283	104.362	16.8299
9656	ENSMUSG00000045817	Zfp36l2	12193	zinc finger protein 36, C3H type-like 2 [Source:MGI Symbol;Acc:MGI:107945]	1412.45	2.76357	0.170898	16.1709	8.09281e-59	1.25166e-55	2468.47	2466.61	2451.85	356.087	358.817	372.858	2462.31	362.587
9658	ENSMUSG00000045827	Serpinb9	20723	serine (or cysteine) peptidase inhibitor, clade B, member 9 [Source:MGI Symbol;Acc:MGI:106603]	135.128	1.33156	0.301517	4.41619	1.00456e-05	0.000133208	163.526	165.079	251.637	87.64	73.7827	69.1041	193.414	76.8422
9675	ENSMUSG00000045973	Slc25a51	230125	solute carrier family 25, member 51 [Source:MGI Symbol;Acc:MGI:2684984]	3566.97	2.01598	0.321015	6.28001	3.38553e-10	1.46188e-08	5504.09	4081.51	7573.64	1937.55	1208.48	1096.55	5719.75	1414.2
9687	ENSMUSG00000046034	Otulin	432940	OTU deubiquitinase with linear linkage specificity [Source:MGI Symbol;Acc:MGI:3577015]	487.366	1.02843	0.288761	3.56151	0.000368721	0.00272742	878.63	561.029	522.631	307.135	383.67	271.101	654.096	320.635
9701	ENSMUSG00000046179	E2f8	108961	E2F transcription factor 8 [Source:MGI Symbol;Acc:MGI:1922038]	334.562	2.09938	0.266119	7.88885	3.04989e-15	2.96501e-13	703.423	439.014	485.208	128.697	121.936	129.095	542.548	126.576
9705	ENSMUSG00000046223	Plaur	18793	plasminogen activator, urokinase receptor [Source:MGI Symbol;Acc:MGI:97612]	22.2176	4.18165	0.6907	6.05421	1.41109e-09	5.31453e-08	44.1261	53.83	28.3898	2.36865	1.55332	3.03754	42.1153	2.31984
9720	ENSMUSG00000046352	Gjb2	14619	gap junction protein, beta 2 [Source:MGI Symbol;Acc:MGI:95720]	13874.3	2.29588	0.294161	7.80484	5.95777e-15	5.47889e-13	28271.9	14556.8	26332.9	3948.54	5160.13	4975.49	23053.9	4694.72
9721	ENSMUSG00000046364	Rpl27a	26451	ribosomal protein L27A [Source:MGI Symbol;Acc:MGI:1347076]	3158.87	1.0809	0.16566	6.52482	6.80845e-11	3.3381e-09	4191.98	4368.61	4308.8	1930.45	2129.6	2023.76	4289.8	2027.94
9727	ENSMUSG00000046434	Hnrnpa1	15382	heterogeneous nuclear ribonucleoprotein A1 [Source:MGI Symbol;Acc:MGI:104820]	1732.46	1.40385	0.316487	4.43574	9.17552e-06	0.000123499	2837.05	1482.12	3224.83	851.923	893.159	1105.66	2514.67	950.249
9728	ENSMUSG00000046441	Cmtr2	234728	cap methyltransferase 2 [Source:MGI Symbol;Acc:MGI:2384580]	66.9981	1.82252	0.487711	3.73688	0.000186316	0.00153649	118.102	43.064	152.273	32.3715	33.3964	22.7816	104.48	29.5165
9754	ENSMUSG00000046711	Hmga1	15361	high mobility group AT-hook 1 [Source:MGI Symbol;Acc:MGI:96160]	156.781	1.05102	0.250293	4.19917	2.67901e-05	0.000309475	240.098	185.415	209.052	106.589	93.9758	105.555	211.522	102.04
9760	ENSMUSG00000046733	Gprc5a	232431	G protein-coupled receptor, family C, group 5, member A [Source:MGI Symbol;Acc:MGI:1891250]	37.2722	2.69058	0.583239	4.61317	3.96566e-06	5.96533e-05	76.5718	52.6338	64.5224	3.94775	6.21328	19.744	64.576	9.96835
9774	ENSMUSG00000046808	Atp10d	231287	ATPase, class V, type 10D [Source:MGI Symbol;Acc:MGI:2450125]	307.589	1.34393	0.442499	3.03714	0.00238836	0.0125624	498.366	430.64	394.877	318.188	100.189	103.276	441.294	173.885
9781	ENSMUSG00000046841	Ckap4	216197	cytoskeleton-associated protein 4 [Source:MGI Symbol;Acc:MGI:2444926]	34.7767	1.65455	0.459161	3.60342	0.000314052	0.00237994	73.9762	41.8678	42.5848	14.2119	14.7565	21.2628	52.8096	16.7437
9794	ENSMUSG00000046962	Zbtb21	114565	zinc finger and BTB domain containing 21 [Source:MGI Symbol;Acc:MGI:1927240]	544.968	2.81318	0.375647	7.48888	6.9463e-14	5.39623e-12	1251.11	478.489	1133.01	141.329	106.402	159.471	954.203	135.734
9811	ENSMUSG00000047109	Cldn14	56173	claudin 14 [Source:MGI Symbol;Acc:MGI:1860425]	664.909	3.73471	0.35532	10.5108	7.70141e-26	2.78775e-23	1853.3	828.983	1028.49	98.6936	69.1227	110.87	1236.92	92.8955
9813	ENSMUSG00000047126	Cltc	67300	clathrin, heavy polypeptide (Hc) [Source:MGI Symbol;Acc:MGI:2388633]	6314.26	1.44301	0.313369	4.60482	4.12827e-06	6.16631e-05	12784.9	5491.86	9421.56	3354.79	3630.88	3201.57	9232.77	3395.75
9836	ENSMUSG00000047330	Kcne4	57814	potassium voltage-gated channel, Isk-related subfamily, gene 4 [Source:MGI Symbol;Acc:MGI:1891125]	10.3033	3.90504	1.09949	3.55169	0.000382771	0.00280696	35.0414	20.3358	2.58089	0.789549	1.55332	1.51877	19.3193	1.28721
9841	ENSMUSG00000047407	Tgif1	21815	TGFB-induced factor homeobox 1 [Source:MGI Symbol;Acc:MGI:1194497]	1080.12	3.26011	0.520422	6.26435	3.74392e-10	1.60442e-08	3893.48	895.971	1078.81	153.173	163.099	296.16	1956.09	204.144
9850	ENSMUSG00000047446	Arl4a	11861	ADP-ribosylation factor-like 4A [Source:MGI Symbol;Acc:MGI:99437]	1663.02	3.05481	0.302156	10.1101	4.98531e-24	1.43754e-21	3805.23	2522.83	2578.31	424.777	238.435	408.549	2968.79	357.254
9862	ENSMUSG00000047547	Cltb	74325	clathrin, light polypeptide (Lcb) [Source:MGI Symbol;Acc:MGI:1921575]	774.502	1.34315	0.234217	5.73465	9.77159e-09	3.09579e-07	1138.2	882.813	1312.38	405.039	425.61	482.969	1111.13	437.872
9874	ENSMUSG00000047648	Fbxo30	71865	F-box protein 30 [Source:MGI Symbol;Acc:MGI:1919115]	727.663	2.46839	0.510051	4.8395	1.30164e-06	2.30195e-05	2092.1	338.531	1267.22	262.13	226.785	179.215	1232.62	222.71
9878	ENSMUSG00000047671	Tctex1d4	242646	Tctex1 domain containing 4 [Source:MGI Symbol;Acc:MGI:3045358]	40.0087	2.74826	0.794183	3.46049	0.000539187	0.00376567	22.0631	19.1396	167.758	11.0537	13.2032	6.83447	69.6536	10.3638
9881	ENSMUSG00000047710	Champ1	101994	chromosome alignment maintaining phosphoprotein 1 [Source:MGI Symbol;Acc:MGI:1196398]	145.88	1.14163	0.43201	2.6426	0.00822725	0.033558	253.076	86.1281	263.251	72.6385	89.3159	110.87	200.819	90.9415
9891	ENSMUSG00000047767	Atg16l2	73683	autophagy related 16-like 2 (S. cerevisiae) [Source:MGI Symbol;Acc:MGI:1920933]	332.56	1.36601	0.383732	3.5598	0.00037114	0.00273935	682.657	374.418	380.682	105.8	203.485	248.319	479.252	185.868
9897	ENSMUSG00000047798	Cd300lf	246746	CD300 molecule like family member F [Source:MGI Symbol;Acc:MGI:2442359]	76.5429	2.43127	0.476466	5.10272	3.34814e-07	6.95506e-06	205.057	75.3621	107.107	15.0014	24.0765	32.6536	129.175	23.9105
9902	ENSMUSG00000047832	Cdca4	71963	cell division cycle associated 4 [Source:MGI Symbol;Acc:MGI:1919213]	53.9584	1.3131	0.479888	2.73625	0.00621429	0.0267519	102.528	40.6716	87.7504	18.9492	42.7163	31.1348	76.9835	30.9334
9907	ENSMUSG00000047879	Usp14	59025	ubiquitin specific peptidase 14 [Source:MGI Symbol;Acc:MGI:1928898]	983.379	1.42273	0.295222	4.81919	1.44144e-06	2.50749e-05	1697.56	905.541	1694.36	594.53	538.225	470.059	1432.49	534.272
9908	ENSMUSG00000047881	Rell1	100532	RELT-like 1 [Source:MGI Symbol;Acc:MGI:2140767]	665.935	2.91219	0.312537	9.3179	1.18665e-20	2.29415e-18	1702.75	823.002	1001.39	147.646	153.002	167.824	1175.71	156.157
9914	ENSMUSG00000047945	Marcksl1	17357	MARCKS-like 1 [Source:MGI Symbol;Acc:MGI:97143]	89.8453	1.21054	0.308583	3.92288	8.74955e-05	0.000830207	149.25	130.388	96.7835	49.7416	57.4728	55.4351	125.474	54.2165
9929	ENSMUSG00000048109	Rbm15	229700	RNA binding motif protein 15 [Source:MGI Symbol;Acc:MGI:2443205]	345.662	1.4797	0.405108	3.65261	0.000259585	0.00202956	651.51	226.086	649.095	184.754	218.241	144.283	508.897	182.426
9943	ENSMUSG00000048222	Mfap1b	100034361	microfibrillar-associated protein 1B [Source:MGI Symbol;Acc:MGI:3694697]	78.824	1.0316	0.349525	2.95142	0.00316312	0.0157318	127.187	71.7734	118.721	56.058	55.9195	43.285	105.894	51.7541
9945	ENSMUSG00000048234	Rnf149	67702	ring finger protein 149 [Source:MGI Symbol;Acc:MGI:2677438]	2501.91	2.18622	0.383233	5.70468	1.16561e-08	3.61871e-07	5327.58	1821.85	5157.92	941.932	769.67	992.516	4102.45	901.373
9953	ENSMUSG00000048285	Frmd6	319710	FERM domain containing 6 [Source:MGI Symbol;Acc:MGI:2442579]	157.938	2.24966	0.415662	5.41224	6.22418e-08	1.58521e-06	330.946	125.603	326.483	69.4803	42.7163	52.3976	261.011	54.8647
9957	ENSMUSG00000048332	Lhfp	108927	lipoma HMGIC fusion partner [Source:MGI Symbol;Acc:MGI:1920048]	63.4925	1.36998	0.395233	3.46625	0.000527772	0.00369756	127.187	76.5583	70.9746	42.6357	25.6298	37.9693	91.5733	35.4116
9974	ENSMUSG00000048489	8430408G22Rik	213393	RIKEN cDNA 8430408G22 gene [Source:MGI Symbol;Acc:MGI:1918730]	1959.38	2.28571	0.85842	2.6627	0.00775165	0.0319934	3607.96	5391.38	756.202	1028.78	304.451	667.5	3251.85	666.911
9975	ENSMUSG00000048490	Nrip1	268903	nuclear receptor interacting protein 1 [Source:MGI Symbol;Acc:MGI:1315213]	520.577	1.19851	0.406477	2.94853	0.00319287	0.0158545	1008.41	302.644	864.6	350.56	323.867	273.379	725.219	315.935
10009	ENSMUSG00000048782	Insc	233752	INSC spindle orientation adaptor protein [Source:MGI Symbol;Acc:MGI:1917942]	568.445	2.93935	0.460464	6.38346	1.73135e-10	7.8758e-09	1758.56	385.184	873.633	116.064	139.022	138.208	1005.79	131.098
10019	ENSMUSG00000048856	Slc25a47	104910	solute carrier family 25, member 47 [Source:MGI Symbol;Acc:MGI:2144766]	22013.4	2.09421	0.296776	7.05653	1.7071e-12	1.09184e-10	39860.2	21773.7	45383.7	8448.96	7654.76	8959.23	35672.5	8354.32
10066	ENSMUSG00000049300	Prmt6	99890	protein arginine N-methyltransferase 6 [Source:MGI Symbol;Acc:MGI:2139971]	64.9084	1.17497	0.432436	2.7171	0.00658573	0.028081	94.7414	68.1847	107.107	21.3178	40.3863	57.7133	90.0111	39.8058
10076	ENSMUSG00000049382	Krt8	16691	keratin 8 [Source:MGI Symbol;Acc:MGI:96705]	14648.1	3.89884	0.327551	11.903	1.14177e-32	5.88634e-30	37618.8	15375.1	29373.2	1646.21	1999.9	1875.68	27455.7	1840.6
10078	ENSMUSG00000049404	Rarres1	109222	retinoic acid receptor responder (tazarotene induced) 1 [Source:MGI Symbol;Acc:MGI:1924461]	1621.01	1.65134	0.31429	5.25418	1.48682e-07	3.44622e-06	1588.54	2934.34	2854.47	1016.15	641.521	691.041	2459.12	782.904
10094	ENSMUSG00000049521	Cdc42ep1	104445	CDC42 effector protein (Rho GTPase binding) 1 [Source:MGI Symbol;Acc:MGI:1929763]	279.501	1.18359	0.395483	2.99276	0.00276469	0.0141248	443.857	205.75	514.888	211.599	111.062	189.846	388.165	170.836
10114	ENSMUSG00000049680	Urgcp	72046	upregulator of cell proliferation [Source:MGI Symbol;Acc:MGI:1919296]	376.528	1.06243	0.294749	3.60451	0.000312745	0.00237241	589.214	338.531	600.058	274.763	248.531	208.072	509.268	243.789
10117	ENSMUSG00000049690	Nckap5	210356	NCK-associated protein 5 [Source:MGI Symbol;Acc:MGI:2686394]	26.7012	2.8653	0.914879	3.13189	0.00173687	0.00980284	93.4436	3.58867	43.8752	2.36865	10.0966	6.83447	46.9692	6.43323
10143	ENSMUSG00000049892	Rasd1	19416	RAS, dexamethasone-induced 1 [Source:MGI Symbol;Acc:MGI:1270848]	91.8063	4.60356	0.49508	9.29863	1.4226e-20	2.6892e-18	238.8	116.034	174.21	7.10594	11.6499	3.03754	176.348	7.26446
10164	ENSMUSG00000050052	Tdrp	72148	testis development related protein [Source:MGI Symbol;Acc:MGI:1919398]	254.103	1.81648	0.435976	4.16647	3.09354e-05	0.000349011	419.198	156.705	611.672	107.379	117.276	112.389	395.859	112.348
10170	ENSMUSG00000050097	Ces2b	234669	carboxyesterase 2B [Source:MGI Symbol;Acc:MGI:2448547]	18.402	1.89669	0.637409	2.97563	0.00292391	0.014762	38.9348	28.7094	19.3567	11.0537	9.31992	3.03754	29.0003	7.80371
10181	ENSMUSG00000050213	Snip1	76793	Smad nuclear interacting protein 1 [Source:MGI Symbol;Acc:MGI:2156003]	224.805	1.32125	0.502557	2.62906	0.00856208	0.0345509	434.772	87.3243	441.333	132.644	131.255	121.502	321.143	128.467
10183	ENSMUSG00000050234	Gja4	14612	gap junction protein, alpha 4 [Source:MGI Symbol;Acc:MGI:95715]	236.314	3.43306	0.254382	13.4957	1.65792e-41	1.2821e-38	460.729	382.791	454.237	42.6357	35.7263	41.7662	432.586	40.0427
10188	ENSMUSG00000050271	Prag1	244418	PEAK1 related kinase activating pseudokinase 1 [Source:MGI Symbol;Acc:MGI:1196223]	39.2955	2.42027	0.616707	3.9245	8.69099e-05	0.000826494	120.698	25.1207	52.9083	7.89549	13.2032	15.9471	66.2423	12.3486
10203	ENSMUSG00000050440	Hamp	84506	hepcidin antimicrobial peptide [Source:MGI Symbol;Acc:MGI:1933533]	11817.1	1.92924	0.313193	6.15991	7.27852e-10	2.9068e-08	23564.7	15706.4	16886.8	3430.59	4383.47	6930.91	18719.3	4914.99
10204	ENSMUSG00000050445	Cyp8b1	13124	cytochrome P450, family 8, subfamily b, polypeptide 1 [Source:MGI Symbol;Acc:MGI:1338044]	5548.99	1.22452	0.285586	4.28774	1.805e-05	0.000220216	8694.15	5817.23	8804.72	4370.15	2576.96	3030.71	7772.03	3325.94
10231	ENSMUSG00000050708	Ftl1	14325	ferritin light polypeptide 1 [Source:MGI Symbol;Acc:MGI:95589]	22046.8	1.38847	0.222874	6.22986	4.66861e-10	1.95153e-08	34665	24699.6	36354.5	13071.8	11593.2	11896.5	31906.4	12187.2
10244	ENSMUSG00000050860	Phospho1	237928	phosphatase, orphan 1 [Source:MGI Symbol;Acc:MGI:2447348]	10.1373	3.86934	0.997327	3.87971	0.00010458	0.000965703	27.2544	16.7471	12.9045	3.1582	0	0.759385	18.9687	1.30586
10247	ENSMUSG00000050896	Rtn4rl2	269295	reticulon 4 receptor-like 2 [Source:MGI Symbol;Acc:MGI:2669796]	4.89793	4.17553	1.4184	2.94383	0.00324179	0.0160187	7.78697	7.17734	12.9045	0	0	1.51877	9.28959	0.506257
10248	ENSMUSG00000050910	Cdr2l	237988	cerebellar degeneration-related protein 2-like [Source:MGI Symbol;Acc:MGI:2684867]	34.9823	1.07437	0.428276	2.50859	0.0121212	0.0453926	55.8066	49.0452	37.423	25.2656	26.4064	15.9471	47.4249	22.5397
10251	ENSMUSG00000050921	P2ry10	78826	purinergic receptor P2Y, G-protein coupled 10 [Source:MGI Symbol;Acc:MGI:1926076]	9.44453	2.08564	0.814945	2.55924	0.0104901	0.0406442	12.9783	25.1207	7.74268	2.36865	4.65996	3.79693	15.2806	3.60851
10255	ENSMUSG00000050953	Gja1	14609	gap junction protein, alpha 1 [Source:MGI Symbol;Acc:MGI:95713]	141.452	1.84644	0.390599	4.72721	2.27625e-06	3.70582e-05	333.542	160.294	170.339	48.952	52.8129	82.773	221.392	61.5126
10294	ENSMUSG00000051316	Taf7	24074	TATA-box binding protein associated factor 7 [Source:MGI Symbol;Acc:MGI:1346348]	137.798	2.13346	0.450229	4.7386	2.15198e-06	3.55452e-05	203.759	99.2865	370.358	48.952	52.0362	52.3976	224.468	51.1286
10298	ENSMUSG00000051339	2900026A02Rik	243219	RIKEN cDNA 2900026A02 gene [Source:MGI Symbol;Acc:MGI:1920194]	4269.49	2.86845	0.233575	12.2806	1.15121e-34	6.75364e-32	8146.47	5776.56	8608.57	1147.21	998.008	940.119	7510.53	1028.45
10316	ENSMUSG00000051439	Cd14	12475	CD14 antigen [Source:MGI Symbol;Acc:MGI:88318]	619.53	5.04421	0.515163	9.79149	1.22476e-22	2.81578e-20	2302.35	415.089	890.409	37.1088	38.0563	34.1723	1202.61	36.4458
10324	ENSMUSG00000051495	Irf2bp2	270110	interferon regulatory factor 2 binding protein 2 [Source:MGI Symbol;Acc:MGI:2443921]	1525.41	2.50891	0.36223	6.92628	4.32039e-12	2.59727e-10	2935.69	3086.26	1762.75	644.272	264.064	459.428	2594.9	455.921
10337	ENSMUSG00000051627	Hist1h1e	50709	histone cluster 1, H1e [Source:MGI Symbol;Acc:MGI:1931527]	11.0237	2.62654	0.961895	2.73059	0.00632212	0.0271269	20.7652	32.298	3.87134	1.5791	1.55332	6.07508	18.9782	3.06917
10366	ENSMUSG00000051978	Erich1	234086	glutamate rich 1 [Source:MGI Symbol;Acc:MGI:3588201]	46.6956	1.32359	0.465851	2.84124	0.00449389	0.0205966	70.0827	34.6905	95.4931	25.2656	32.6197	22.0222	66.7554	26.6358
10389	ENSMUSG00000052253	Zfp622	52521	zinc finger protein 622 [Source:MGI Symbol;Acc:MGI:1289282]	352.963	1.06665	0.2784	3.83136	0.000127435	0.00114046	563.257	352.886	517.469	227.39	187.952	268.822	477.871	228.055
10397	ENSMUSG00000052305	Hbb-bs	15129|100503605	hemoglobin, beta adult s chain [Source:MGI Symbol;Acc:MGI:5474852]|hemoglobin, beta adult s chain [Source:MGI Symbol;Acc:MGI:5474852]	2003.56	1.00664	0.332374	3.02864	0.00245661	0.0128677	2449	3437.95	2139.56	1001.15	1033.73	1959.97	2675.5	1331.62
10407	ENSMUSG00000052397	Ezr	22350	ezrin [Source:MGI Symbol;Acc:MGI:98931]	199.895	1.84745	0.25223	7.32445	2.39883e-13	1.76672e-11	289.416	293.075	356.163	74.2176	88.5392	97.9607	312.885	86.9058
10429	ENSMUSG00000052560	Cpne8	66871	copine VIII [Source:MGI Symbol;Acc:MGI:1914121]	283.195	1.77883	0.576523	3.08544	0.0020325	0.0110759	724.188	155.509	436.171	52.8998	105.626	224.778	438.623	127.768
10439	ENSMUSG00000052632	Asap2	211914	ArfGAP with SH3 domain, ankyrin repeat and PH domain 2 [Source:MGI Symbol;Acc:MGI:2685438]	155.278	2.18065	0.440757	4.94752	7.51646e-07	1.41614e-05	425.688	168.667	169.049	42.6357	48.9296	76.6979	254.468	56.0877
10440	ENSMUSG00000052656	Rnf103	22644	ring finger protein 103 [Source:MGI Symbol;Acc:MGI:109483]	2414.29	1.08532	0.272218	3.98696	6.69243e-05	0.000666227	3348.4	2490.54	4006.84	1783.59	1176.64	1679.76	3281.92	1546.66
10444	ENSMUSG00000052681	Rap1b	215449	RAS related protein 1b [Source:MGI Symbol;Acc:MGI:894315]	1067.3	1.00379	0.269013	3.73139	0.000190427	0.0015603	1898.72	1065.83	1308.51	726.385	761.127	643.199	1424.36	710.237
10445	ENSMUSG00000052684	Jun	16476	jun proto-oncogene [Source:MGI Symbol;Acc:MGI:96646]	4354.88	3.57081	0.298446	11.9647	5.44075e-33	2.89261e-30	11043.2	7342.42	5715.39	826.658	592.591	609.027	8033.68	676.092
10467	ENSMUSG00000052837	Junb	16477	jun B proto-oncogene [Source:MGI Symbol;Acc:MGI:96647]	2259.65	4.46118	0.403546	11.055	2.07431e-28	8.40244e-26	7175.69	3220.23	2573.15	200.545	249.308	138.967	4323.03	196.274
10497	ENSMUSG00000053113	Socs3	12702	suppressor of cytokine signaling 3 [Source:MGI Symbol;Acc:MGI:1201791]	626.771	4.05548	0.890615	4.55357	5.27432e-06	7.69571e-05	2546.34	300.252	700.713	43.4252	93.1992	76.6979	1182.43	71.1074
10503	ENSMUSG00000053168	9030619P08Rik		RIKEN cDNA 9030619P08 gene [Source:MGI Symbol;Acc:MGI:3612405]	46.3394	1.73068	0.367026	4.71541	2.41223e-06	3.88629e-05	62.2957	77.7545	73.5555	24.476	20.9698	18.9846	71.2019	21.4768
10504	ENSMUSG00000053175	Bcl3	12051	B cell leukemia/lymphoma 3 [Source:MGI Symbol;Acc:MGI:88140]	325.741	1.98415	0.488715	4.05994	4.90853e-05	0.000515487	996.732	218.909	344.549	116.853	146.789	130.614	520.063	131.419
10516	ENSMUSG00000053293	Pom121	107939	nuclear pore membrane protein 121 [Source:MGI Symbol;Acc:MGI:2137624]	240.778	1.04512	0.395248	2.64422	0.00818795	0.0334297	360.796	154.313	458.109	183.175	157.662	130.614	324.406	157.151
10518	ENSMUSG00000053310	Nrgn	64011	neurogranin [Source:MGI Symbol;Acc:MGI:1927184]	12.0438	2.50856	0.770163	3.25718	0.00112526	0.00688768	23.3609	23.9245	14.1949	0.789549	5.43662	4.55631	20.4934	3.59416
10521	ENSMUSG00000053332	Gas5		growth arrest specific 5 [Source:MGI Symbol;Acc:MGI:95659]	722.008	1.0506	0.241408	4.35197	1.34917e-05	0.000171807	1121.32	782.33	1018.16	396.354	482.306	531.57	973.939	470.076
10542	ENSMUSG00000053560	Ier2	15936	immediate early response 2 [Source:MGI Symbol;Acc:MGI:104815]	2187.64	4.70273	0.482018	9.75635	1.73287e-22	3.82873e-20	7143.24	4162.86	1334.32	193.44	153.779	138.208	4213.47	161.809
10545	ENSMUSG00000053581	Zfand2a	100494	zinc finger, AN1-type domain 2A [Source:MGI Symbol;Acc:MGI:2140729]	1016.81	4.0817	0.473561	8.61916	6.74464e-18	9.17973e-16	2634.59	598.112	2527.99	90.0086	116.499	133.652	1920.23	113.386
10546	ENSMUSG00000053600	Zfp472	224691	zinc finger protein 472 [Source:MGI Symbol;Acc:MGI:2385049]	59.7791	1.4021	0.453652	3.0907	0.00199683	0.0109267	112.911	45.4565	101.945	24.476	44.2696	29.616	86.771	32.7872
10564	ENSMUSG00000053801	Grwd1	101612	glutamate-rich WD repeat containing 1 [Source:MGI Symbol;Acc:MGI:2141989]	164.135	1.36957	0.475255	2.88175	0.00395473	0.0186635	268.65	80.147	361.325	97.9041	95.5291	81.2542	236.708	91.5625
10567	ENSMUSG00000053830	Gm9923		predicted pseudogene 9923 [Source:MGI Symbol;Acc:MGI:3704365]	6.55489	2.88793	1.05355	2.74114	0.00612273	0.0264448	15.5739	3.58867	15.4854	2.36865	1.55332	0.759385	11.5493	1.56045
10577	ENSMUSG00000053907	Mat2a	232087	methionine adenosyltransferase II, alpha [Source:MGI Symbol;Acc:MGI:2443731]	5981.52	3.49208	0.442758	7.88711	3.09273e-15	2.98958e-13	9449.49	4312.38	19198	947.459	1050.04	931.766	10986.6	976.423
10589	ENSMUSG00000054027	Nt5dc3	103466	5'-nucleotidase domain containing 3 [Source:MGI Symbol;Acc:MGI:3513266]	551.801	2.11077	0.277679	7.60147	2.92791e-14	2.41808e-12	1095.37	778.741	814.272	259.762	156.109	206.553	896.127	207.474
10615	ENSMUSG00000054364	Rhob	11852	ras homolog family member B [Source:MGI Symbol;Acc:MGI:107949]	1479.5	3.46702	0.390919	8.8689	7.38749e-19	1.13228e-16	4647.52	1752.47	1740.81	266.078	240.765	229.334	2713.6	245.392
10634	ENSMUSG00000054484	Tmem62	96957	transmembrane protein 62 [Source:MGI Symbol;Acc:MGI:2139461]	265.859	1.06936	0.256642	4.16673	3.09002e-05	0.000349011	419.198	303.841	357.454	168.964	144.459	201.237	360.164	171.553
10635	ENSMUSG00000054499	Dedd2	67379	death effector domain-containing DNA binding protein 2 [Source:MGI Symbol;Acc:MGI:1914629]	253.548	1.59509	0.220303	7.24044	4.47248e-13	3.13129e-11	406.22	344.512	392.296	131.855	118.829	127.577	381.009	126.087
10642	ENSMUSG00000054556	Gm4876		predicted gene 4876 [Source:MGI Symbol;Acc:MGI:3647654]	13.6668	7.58118	1.51129	5.01637	5.26579e-07	1.02502e-05	62.2957	11.9622	7.74268	0	0	0	27.3336	0
10652	ENSMUSG00000054648	Zfp869	66869	zinc finger protein 869 [Source:MGI Symbol;Acc:MGI:1914119]	261.778	1.0374	0.348449	2.97721	0.00290889	0.0147026	298.5	226.086	531.664	178.438	151.449	184.531	352.084	171.472
10662	ENSMUSG00000054717	Hmgb2	97165	high mobility group box 2 [Source:MGI Symbol;Acc:MGI:96157]	213.453	2.05091	0.433029	4.7362	2.17761e-06	3.58642e-05	214.142	547.87	269.703	57.6371	68.3461	123.02	343.905	83.0012
10681	ENSMUSG00000054855	Rnd1	223881	Rho family GTPase 1 [Source:MGI Symbol;Acc:MGI:2444878]	130.744	2.18219	0.41165	5.3011	1.15108e-07	2.74661e-06	347.818	136.369	158.725	41.8461	44.2696	55.4351	214.304	47.1836
10698	ENSMUSG00000055044	Pdlim1	54132	PDZ and LIM domain 1 (elfin) [Source:MGI Symbol;Acc:MGI:1860611]	507.72	1.26719	0.21073	6.01333	1.81753e-09	6.72211e-08	786.484	665.1	700.713	285.027	271.831	337.167	717.432	298.008
10704	ENSMUSG00000055116	Arntl	11865	aryl hydrocarbon receptor nuclear translocator-like [Source:MGI Symbol;Acc:MGI:1096381]	110.565	2.87228	0.514184	5.58609	2.32241e-08	6.70819e-07	360.796	135.173	87.7504	24.476	23.2998	31.8942	194.573	26.5567
10707	ENSMUSG00000055148	Klf2	16598	Kruppel-like factor 2 (lung) [Source:MGI Symbol;Acc:MGI:1342772]	130.934	3.17444	0.303462	10.4607	1.30827e-25	4.54236e-23	231.013	261.973	214.214	26.0551	31.843	20.5034	235.734	26.1339
10724	ENSMUSG00000055320	Tead1	21676	TEA domain family member 1 [Source:MGI Symbol;Acc:MGI:101876]	323.182	1.89061	0.431078	4.38576	1.1558e-05	0.000150679	620.362	216.516	690.389	145.277	170.865	95.6825	509.089	137.275
10749	ENSMUSG00000055653	Gpc3	14734	glypican 3 [Source:MGI Symbol;Acc:MGI:104903]	45.7805	1.67162	0.407587	4.10125	4.10933e-05	0.000444168	66.1892	69.3809	73.5555	14.2119	20.9698	30.3754	69.7086	21.8524
10790	ENSMUSG00000056054	S100a8	20201	S100 calcium binding protein A8 (calgranulin A) [Source:MGI Symbol;Acc:MGI:88244]	70.4546	3.48032	0.652792	5.33144	9.74359e-08	2.35132e-06	260.863	89.7167	37.423	9.47459	8.54326	16.7065	129.334	11.5748
10792	ENSMUSG00000056071	S100a9	20202	S100 calcium binding protein A9 (calgranulin B) [Source:MGI Symbol;Acc:MGI:1338947]	155.923	3.5875	0.613976	5.84306	5.12504e-09	1.74734e-07	587.916	200.966	74.8459	16.5805	24.8531	30.3754	287.909	23.9363
10794	ENSMUSG00000056091	St3gal5	20454	ST3 beta-galactoside alpha-2,3-sialyltransferase 5 [Source:MGI Symbol;Acc:MGI:1339963]	6832.18	1.3314	0.418905	3.1783	0.00148144	0.00858144	4281.53	8354.42	16699.7	4163.29	3846.8	3647.33	9778.55	3885.81
10797	ENSMUSG00000056124	B4galt6	56386	UDP-Gal:betaGlcNAc beta 1,4-galactosyltransferase, polypeptide 6 [Source:MGI Symbol;Acc:MGI:1928380]	30.8137	1.06734	0.41198	2.59076	0.0095763	0.0378272	46.7218	35.8867	42.5848	20.5283	19.4165	19.744	41.7311	19.8963
10808	ENSMUSG00000056209	Npm3	18150	nucleoplasmin 3 [Source:MGI Symbol;Acc:MGI:894653]	205.311	1.09036	0.282388	3.86121	0.000112828	0.00103145	211.546	302.644	323.902	151.593	133.585	108.592	279.364	131.257
10821	ENSMUSG00000056313	Tcim	69068	transcriptional and immune response regulator [Source:MGI Symbol;Acc:MGI:1916318]	476.579	1.48434	0.411652	3.60581	0.000311182	0.0023624	992.838	802.666	310.998	278.711	291.247	183.012	702.167	250.99
10827	ENSMUSG00000056429	Tgoln1	22134	trans-golgi network protein [Source:MGI Symbol;Acc:MGI:105080]	4450.27	1.10459	0.253997	4.34883	1.36863e-05	0.000173894	7725.97	4721.49	5778.62	2509.98	3268.96	2696.58	6075.36	2825.17
10833	ENSMUSG00000056498	Tmem154	320782	transmembrane protein 154 [Source:MGI Symbol;Acc:MGI:2444725]	10.1812	2.94877	0.956165	3.08395	0.00204271	0.0111208	31.1479	3.58867	19.3567	2.36865	3.10664	1.51877	18.0311	2.33135
10834	ENSMUSG00000056501	Cebpb	12608	CCAAT/enhancer binding protein (C/EBP), beta [Source:MGI Symbol;Acc:MGI:88373]	1945.56	2.82652	0.255986	11.0417	2.40419e-28	9.5122e-26	4438.57	2772.85	3019.65	492.679	528.905	420.699	3410.35	480.761
10835	ENSMUSG00000056515	Rab31	106572	RAB31, member RAS oncogene family [Source:MGI Symbol;Acc:MGI:1914603]	113.696	1.38851	0.326364	4.25447	2.09548e-05	0.000251236	219.333	120.819	153.563	70.2699	55.9195	62.2696	164.572	62.8197
10838	ENSMUSG00000056537	Rlim	19820	ring finger protein, LIM domain interacting [Source:MGI Symbol;Acc:MGI:1342291]	1302.18	1.0678	0.304842	3.50281	0.000460381	0.00328329	2317.92	1064.64	1907.28	889.822	817.823	815.58	1763.28	841.075
10854	ENSMUSG00000056708	Ier5	15939	immediate early response 5 [Source:MGI Symbol;Acc:MGI:1337072]	105.938	3.33474	0.593428	5.61946	1.91558e-08	5.62862e-07	347.818	55.0263	175.501	12.6328	27.1831	17.4659	192.782	19.0939
10860	ENSMUSG00000056749	Nfil3	18030	nuclear factor, interleukin 3, regulated [Source:MGI Symbol;Acc:MGI:109495]	493.492	2.69949	0.582861	4.63145	3.63111e-06	5.5145e-05	1855.89	454.565	255.509	141.329	103.296	150.358	855.322	131.661
10873	ENSMUSG00000056952	Tatdn2	381801	TatD DNase domain containing 2 [Source:MGI Symbol;Acc:MGI:3576210]	551.403	1.68103	0.34162	4.92076	8.62091e-07	1.59943e-05	1266.68	510.787	744.588	266.078	243.871	276.416	840.685	262.122
10887	ENSMUSG00000057110	Cntrl	26920	centriolin [Source:MGI Symbol;Acc:MGI:1889576]	789.862	1.2224	0.295422	4.13782	3.50628e-05	0.000389122	1290.04	700.987	1326.58	494.258	413.96	513.344	1105.87	473.854
10914	ENSMUSG00000057322	Rpl38	67671	ribosomal protein L38 [Source:MGI Symbol;Acc:MGI:1914921]	829.703	1.09907	0.189729	5.79287	6.91931e-09	2.26817e-07	1156.36	1015.59	1222.05	517.155	551.428	515.623	1131.34	528.069
10919	ENSMUSG00000057359	Gm17494		predicted gene, 17494 [Source:MGI Symbol;Acc:MGI:4937128]	67.0025	2.65954	0.464725	5.72282	1.04771e-08	3.307e-07	137.57	58.6149	150.982	12.6328	20.1932	22.0222	115.722	18.2827
10935	ENSMUSG00000057506	Bloc1s2	73689	biogenesis of lysosomal organelles complex-1, subunit 2 [Source:MGI Symbol;Acc:MGI:1920939]	168.803	1.14752	0.299326	3.83367	0.000126243	0.00113293	308.883	172.256	216.795	110.537	105.626	98.7201	232.645	104.961
10943	ENSMUSG00000057561	Eif1a	13664	eukaryotic translation initiation factor 1A [Source:MGI Symbol;Acc:MGI:95298]	1905.9	1.29006	0.30935	4.17024	3.04283e-05	0.000344429	3790.96	1671.12	2654.45	1050.89	1112.95	1155.02	2705.51	1106.29
10948	ENSMUSG00000057606	Colq	382864	collagen-like tail subunit (single strand of homotrimer) of asymmetric acetylcholinesterase [Source:MGI Symbol;Acc:MGI:1338761]	3.33126	5.54738	2.03415	2.72712	0.00638894	0.027386	0	8.37356	11.614	0	0	0	6.66253	0
10955	ENSMUSG00000057691	Zfp746	69228	zinc finger protein 746 [Source:MGI Symbol;Acc:MGI:1916478]	496.651	1.26229	0.389589	3.24005	0.0011951	0.00720493	782.59	352.886	967.835	277.921	217.465	381.211	701.104	292.199
10977	ENSMUSG00000057933	Gsta2	14858	glutathione S-transferase, alpha 2 (Yc2) [Source:MGI Symbol;Acc:MGI:95863]	532.596	1.09976	0.227345	4.83738	1.3156e-06	2.32422e-05	739.762	817.02	621.996	330.032	388.33	298.438	726.259	338.933
11016	ENSMUSG00000058392	Rrp1b	72462	ribosomal RNA processing 1 homolog B (S. cerevisiae) [Source:MGI Symbol;Acc:MGI:1919712]	158.536	1.17914	0.331458	3.55744	0.000374493	0.00276051	220.631	139.958	299.384	93.9563	95.5291	101.758	219.991	97.081
11020	ENSMUSG00000058427	Cxcl2	20310	chemokine (C-X-C motif) ligand 2 [Source:MGI Symbol;Acc:MGI:1340094]	19.8027	7.14586	1.47547	4.84311	1.27822e-06	2.26525e-05	81.7632	31.1018	5.16179	0.789549	0	0	39.3423	0.263183
11028	ENSMUSG00000058503	Fam133b	68152	family with sequence similarity 133, member B [Source:MGI Symbol;Acc:MGI:1915402]	347.806	1.82245	0.312839	5.82554	5.69294e-09	1.91034e-07	568.449	339.727	718.779	159.489	156.109	144.283	542.318	153.294
11035	ENSMUSG00000058581	Gm5801		predicted pseudogene 5801 [Source:MGI Symbol;Acc:MGI:3646055]	19.7286	1.49184	0.521371	2.86138	0.00421798	0.0196442	32.4457	23.9245	30.9707	12.6328	7.7666	10.6314	29.1136	10.3436
11047	ENSMUSG00000058672	Tubb2a	22151	tubulin, beta 2A class IIA [Source:MGI Symbol;Acc:MGI:107861]	2165.05	5.26386	0.351438	14.9781	1.02171e-50	1.24159e-47	4751.35	2257.27	5652.16	101.852	129.702	97.9607	4220.26	109.838
11059	ENSMUSG00000058806	Col13a1	12817	collagen, type XIII, alpha 1 [Source:MGI Symbol;Acc:MGI:1277201]	116.453	1.2502	0.342723	3.64785	0.000264445	0.00206331	218.035	108.856	165.177	57.6371	76.1127	72.901	164.023	68.8836
11069	ENSMUSG00000058922	Gm10052		predicted pseudogene 10052 [Source:MGI Symbol;Acc:MGI:3704348]	16.3097	2.32559	0.677738	3.4314	0.000600471	0.00409945	45.424	15.5509	20.6472	3.94775	6.21328	6.07508	27.2073	5.41203
11094	ENSMUSG00000059195	Gm12715		predicted gene 12715 [Source:MGI Symbol;Acc:MGI:3650759]	39.0809	5.39734	0.710772	7.59364	3.11052e-14	2.55648e-12	110.315	49.0452	69.6842	2.36865	1.55332	1.51877	76.3482	1.81358
11151	ENSMUSG00000059796	Eif4a1	13681	eukaryotic translation initiation factor 4A1 [Source:MGI Symbol;Acc:MGI:95303]	6983.19	1.35307	0.332463	4.06983	4.70469e-05	0.000498042	13424.7	5353.1	11334	4088.29	3909.7	3789.33	10037.3	3929.11
11160	ENSMUSG00000059866	Tnip2	231130	TNFAIP3 interacting protein 2 [Source:MGI Symbol;Acc:MGI:2386643]	168.52	1.64853	0.351386	4.6915	2.7121e-06	4.29618e-05	329.648	151.92	285.189	69.4803	78.4426	96.4419	255.586	81.455
11172	ENSMUSG00000059974	Ntm	235106	neurotrimin [Source:MGI Symbol;Acc:MGI:2446259]	51.7062	1.68353	0.361095	4.66228	3.1273e-06	4.8412e-05	80.4653	82.5394	73.5555	22.1074	31.0664	20.5034	78.8534	24.5591
11187	ENSMUSG00000060126	Tpt1	22070	tumor protein, translationally-controlled 1 [Source:MGI Symbol;Acc:MGI:104890]	10901.8	1.27645	0.207165	6.16154	7.2041e-10	2.88385e-08	17651.8	12546	16100.9	6101.64	6488.22	6522.36	15432.9	6370.74
11207	ENSMUSG00000060314	Zfp941	407812	zinc finger protein 941 [Source:MGI Symbol;Acc:MGI:3039601]	31.272	1.90517	0.560287	3.40034	0.000673009	0.00450429	44.1261	22.7282	81.2982	11.0537	14.7565	13.6689	49.3842	13.1597
11211	ENSMUSG00000060373	Hnrnpc	15381	heterogeneous nuclear ribonucleoprotein C [Source:MGI Symbol;Acc:MGI:107795]	1515.09	1.39575	0.271576	5.13946	2.75534e-07	5.88163e-06	2661.85	1476.14	2449.27	881.926	855.879	765.46	2195.75	834.422
11220	ENSMUSG00000060459	Kng2	385643	kininogen 2 [Source:MGI Symbol;Acc:MGI:3027157]	5222.66	1.29231	0.228052	5.66673	1.45551e-08	4.41402e-07	8790.19	6385.44	7075.52	2610.25	2937.33	3537.22	7417.05	3028.26
11223	ENSMUSG00000060477	Irak2	108960	interleukin-1 receptor-associated kinase 2 [Source:MGI Symbol;Acc:MGI:2429603]	402.357	1.60867	0.279476	5.75602	8.61185e-09	2.76963e-07	789.079	501.218	527.793	222.653	160.769	212.628	606.03	198.683
11242	ENSMUSG00000060671	Atp8b2	54667	ATPase, class I, type 8B, member 2 [Source:MGI Symbol;Acc:MGI:1859660]	43.8494	1.49984	0.425785	3.52252	0.000427465	0.00308025	75.274	59.8112	59.3606	13.4223	24.8531	30.3754	64.8153	22.8836
11247	ENSMUSG00000060708	Bloc1s4	117197	biogenesis of lysosomal organelles complex-1, subunit 4, cappuccino [Source:MGI Symbol;Acc:MGI:1929230]	84.8844	1.33553	0.337091	3.96194	7.43435e-05	0.000727526	136.272	96.8941	131.626	52.1102	57.4728	34.9317	121.597	48.1716
11250	ENSMUSG00000060733	Ipmk	69718	inositol polyphosphate multikinase [Source:MGI Symbol;Acc:MGI:1916968]	2668.03	1.7331	0.217748	7.9592	1.73152e-15	1.74801e-13	4851.28	3667.62	3787.46	1380.92	1238.77	1082.12	4102.12	1233.94
11255	ENSMUSG00000060795	Gm13363		predicted gene 13363 [Source:MGI Symbol;Acc:MGI:3651407]	14.0404	3.15558	0.710335	4.44238	8.89688e-06	0.000120416	24.6587	22.7282	28.3898	1.5791	2.32998	4.55631	25.2589	2.8218
11260	ENSMUSG00000060860	Ube2s	77891	ubiquitin-conjugating enzyme E2S [Source:MGI Symbol;Acc:MGI:1925141]	159.017	1.01292	0.258694	3.91553	9.02047e-05	0.000852585	228.418	172.256	237.442	101.062	103.296	111.63	212.705	105.329
11268	ENSMUSG00000060969	Irx1	16371	Iroquois homeobox 1 [Source:MGI Symbol;Acc:MGI:1197515]	8.98043	3.39695	1.26286	2.68989	0.00714757	0.0300325	31.1479	0	18.0663	1.5791	2.32998	0.759385	16.4047	1.55615
11272	ENSMUSG00000061024	Rrs1	59014	ribosome biogenesis regulator 1 [Source:MGI Symbol;Acc:MGI:1929721]	365.793	1.80306	0.40735	4.42631	9.58583e-06	0.000128126	573.64	270.346	862.019	131.855	204.262	152.636	568.668	162.918
11276	ENSMUSG00000061048	Cdh3	12560	cadherin 3 [Source:MGI Symbol;Acc:MGI:88356]	24.3691	2.04407	0.686529	2.97741	0.00290698	0.0147026	45.424	15.5509	56.7797	3.1582	10.8732	14.4283	39.2515	9.48658
11278	ENSMUSG00000061079	Zfp143	20841	zinc finger protein 143 [Source:MGI Symbol;Acc:MGI:1277969]	146.481	1.24776	0.452961	2.75467	0.00587514	0.0255964	293.309	81.3432	243.895	105.01	86.9859	68.3447	206.182	86.7802
11286	ENSMUSG00000061126	Cyp4f39	320997	cytochrome P450, family 4, subfamily f, polypeptide 39 [Source:MGI Symbol;Acc:MGI:2445210]	19.679	4.17226	0.981907	4.24914	2.14595e-05	0.000256204	80.4653	10.766	20.6472	3.1582	0	3.03754	37.2928	2.06525
11288	ENSMUSG00000061132	Blnk	17060	B cell linker [Source:MGI Symbol;Acc:MGI:96878]	44.4247	1.30489	0.433843	3.00774	0.00263199	0.0135814	85.6566	37.0829	67.1033	26.8447	22.5231	27.3379	63.2809	25.5686
11318	ENSMUSG00000061458	Nol10	217431	nucleolar protein 10 [Source:MGI Symbol;Acc:MGI:2684913]	170.432	1.28653	0.389179	3.30574	0.000947258	0.00596657	290.713	117.23	317.45	105.8	104.072	87.3293	241.798	99.0671
11324	ENSMUSG00000061531	Tmem236	625286	transmembrane protein 236 [Source:MGI Symbol;Acc:MGI:1919309]	3.00395	5.39296	1.84228	2.92732	0.00341892	0.0167144	9.0848	1.19622	7.74268	0	0	0	6.0079	0
11331	ENSMUSG00000061589	Dot1l	208266	DOT1-like, histone H3 methyltransferase (S. cerevisiae) [Source:MGI Symbol;Acc:MGI:2143886]	1287.54	3.20016	0.355145	9.01085	2.0446e-19	3.45613e-17	3118.68	1157.94	2690.58	251.866	257.074	249.078	2322.4	252.673
11334	ENSMUSG00000061613	U2af1	108121	U2 small nuclear ribonucleoprotein auxiliary factor (U2AF) 1 [Source:MGI Symbol;Acc:MGI:98884]	714.072	1.05276	0.22089	4.76598	1.87938e-06	3.17515e-05	1049.94	773.956	1067.2	442.937	462.113	488.285	963.7	464.445
11350	ENSMUSG00000061825	Ces2c	234671	carboxylesterase 2C [Source:MGI Symbol;Acc:MGI:2385905]	170.172	1.16237	0.376035	3.09113	0.00199395	0.0109183	319.266	155.509	230.99	141.329	104.072	69.8634	235.255	105.088
11354	ENSMUSG00000061878	Sphk1	20698	sphingosine kinase 1 [Source:MGI Symbol;Acc:MGI:1316649]	17.4134	4.42687	0.935075	4.73424	2.19879e-06	3.61779e-05	59.7001	14.3547	25.8089	1.5791	0	3.03754	33.2879	1.53888
11367	ENSMUSG00000061983	Rps12	20042	ribosomal protein S12 [Source:MGI Symbol;Acc:MGI:98105]	1454.69	1.0465	0.198776	5.26469	1.40427e-07	3.27366e-06	1992.17	1709.4	2179.57	870.083	967.718	1009.22	1960.38	949.008
11375	ENSMUSG00000062061	Obp2a	227627	odorant binding protein 2A [Source:MGI Symbol;Acc:MGI:2387617]	25.0476	1.86202	0.636734	2.92433	0.00345195	0.0168275	41.5305	63.3998	12.9045	8.68504	10.0966	13.6689	39.2783	10.8168
11397	ENSMUSG00000062248	Cks2	66197	CDC28 protein kinase regulatory subunit 2 [Source:MGI Symbol;Acc:MGI:1913447]	259.221	1.61366	0.567573	2.84309	0.00446782	0.0204881	821.525	232.067	118.721	121.591	145.235	116.186	390.771	127.671
11406	ENSMUSG00000062382	Ftl1-ps1	100862446	ferritin light polypeptide 1, pseudogene 1 [Source:MGI Symbol;Acc:MGI:3779109]	80.732	2.179	0.327841	6.6465	3.00138e-11	1.58088e-09	144.059	133.977	118.721	26.0551	37.2797	24.3003	132.252	29.2117
11412	ENSMUSG00000062480	Acat3	224530	acetyl-Coenzyme A acetyltransferase 3 [Source:MGI Symbol;Acc:MGI:109182]	1255.46	1.27103	0.260496	4.87926	1.06486e-06	1.92524e-05	1781.92	2192.68	1351.1	867.714	707.537	631.808	1775.23	735.687
11414	ENSMUSG00000062515	Fabp4	11770	fatty acid binding protein 4, adipocyte [Source:MGI Symbol;Acc:MGI:88038]	257.86	2.62275	0.29316	8.94648	3.67001e-19	5.83532e-17	587.916	378.007	365.197	72.6385	62.9094	80.4948	443.706	72.0143
11419	ENSMUSG00000062554	Gm12751		predicted gene 12751 [Source:MGI Symbol;Acc:MGI:3651049]	108.316	1.64328	0.312923	5.25139	1.50952e-07	3.4846e-06	192.079	119.622	180.663	57.6371	52.8129	47.0819	164.121	52.5106
11445	ENSMUSG00000062825	Actg1	11465	actin, gamma, cytoplasmic 1 [Source:MGI Symbol;Acc:MGI:87906]	10518.5	4.87628	0.288124	16.9242	2.98188e-64	7.24724e-61	25495.8	14340.3	21196.9	814.815	529.682	733.566	20344.3	692.688
11462	ENSMUSG00000062991	Nrg1	211323	neuregulin 1 [Source:MGI Symbol;Acc:MGI:96083]	64.8242	5.94948	0.846033	7.0322	2.03299e-12	1.28101e-10	249.183	40.6716	92.9122	0	4.65996	1.51877	127.589	2.05958
11465	ENSMUSG00000063011	Msln	56047	mesothelin [Source:MGI Symbol;Acc:MGI:1888992]	66.964	1.26171	0.368134	3.4273	0.000609621	0.00414362	110.315	76.5583	96.7835	26.8447	41.163	50.1194	94.5524	39.3757
11467	ENSMUSG00000063019	Manbal	69161	mannosidase, beta A, lysosomal-like [Source:MGI Symbol;Acc:MGI:1916411]	70.0957	1.06886	0.33305	3.20929	0.00133063	0.00786588	97.3371	76.5583	110.978	41.8461	54.3662	39.488	94.958	45.2334
11483	ENSMUSG00000063229	Ldha	16828	lactate dehydrogenase A [Source:MGI Symbol;Acc:MGI:96759]	10820.3	1.13669	0.25105	4.52773	5.96195e-06	8.50928e-05	18701.7	12739.8	13184.5	5432.89	7451.27	7411.6	14875.3	6765.25
11504	ENSMUSG00000063406	Tmed5	73130	transmembrane p24 trafficking protein 5 [Source:MGI Symbol;Acc:MGI:1921586]	3067.29	1.03963	0.320527	3.24352	0.00118064	0.00714307	3431.46	2780.02	6169.63	2198.1	2061.25	1763.29	4127.04	2007.55
11529	ENSMUSG00000063652	Slc22a21	56517	solute carrier family 22 (organic cation transporter), member 21 [Source:MGI Symbol;Acc:MGI:1929481]	36.39	3.30098	0.727467	4.53763	5.68905e-06	8.19541e-05	101.231	13.1585	83.8791	6.31639	3.8833	9.87201	66.0894	6.69057
11548	ENSMUSG00000063838	Cdc42ep5	58804	CDC42 effector protein (Rho GTPase binding) 5 [Source:MGI Symbol;Acc:MGI:1929745]	24.4325	2.09984	0.682416	3.07707	0.00209046	0.0113554	60.9979	34.6905	23.2281	7.10594	3.10664	17.4659	39.6388	9.22615
11557	ENSMUSG00000063897		236082	dehydrogenase/reductase (SDR family) X chromosome [Source:NCBI gene;Acc:236082]	169.372	1.03701	0.395042	2.62508	0.00866297	0.0348896	211.546	169.864	301.965	59.2162	148.342	125.299	227.791	110.952
11560	ENSMUSG00000063919	Srrm4	68955	serine/arginine repetitive matrix 4 [Source:MGI Symbol;Acc:MGI:1916205]	351.263	2.64964	0.366364	7.23227	4.74991e-13	3.29838e-11	772.208	503.61	541.988	150.804	68.3461	70.6228	605.935	96.5909
11570	ENSMUSG00000064068	Mtx1	17827	metaxin 1 [Source:MGI Symbol;Acc:MGI:103025]	164.763	1.11368	0.239213	4.65559	3.23057e-06	4.97823e-05	229.716	230.871	215.505	101.062	116.499	94.9231	225.364	104.161
11582	ENSMUSG00000064177	Ghrl	58991	ghrelin [Source:MGI Symbol;Acc:MGI:1930008]	6.30134	3.46947	1.21434	2.85708	0.00427557	0.0198473	18.1696	3.58867	12.9045	2.36865	0.77666	0	11.5542	1.04844
11589	ENSMUSG00000064246	Chil1	12654	chitinase-like 1 [Source:MGI Symbol;Acc:MGI:1340899]	9.65674	3.27008	1.27714	2.56046	0.0104532	0.0405936	44.1261	8.37356	0	2.36865	1.55332	1.51877	17.4999	1.81358
11590	ENSMUSG00000064254	Ethe1	66071	ethylmalonic encephalopathy 1 [Source:MGI Symbol;Acc:MGI:1913321]	324.675	1.49186	0.352381	4.23365	2.29925e-05	0.00027214	536.003	619.644	281.318	219.495	135.915	155.674	478.988	170.361
11605	ENSMUSG00000064340	mt-Tl1		mitochondrially encoded tRNA leucine 1 [Source:MGI Symbol;Acc:MGI:102482]	86.085	1.19531	0.482024	2.47978	0.0131465	0.0484534	132.378	64.5961	162.596	77.3758	26.4064	53.157	119.857	52.3131
11606	ENSMUSG00000064341	mt-Nd1	17716	mitochondrially encoded NADH dehydrogenase 1 [Source:MGI Symbol;Acc:MGI:101787]	134149	1.10177	0.223421	4.93137	8.16562e-07	1.52829e-05	201117	141616	206328	91955.6	84050.1	79825.8	183020	85277.2
11616	ENSMUSG00000064354	mt-Co2	17709	mitochondrially encoded cytochrome c oxidase II [Source:MGI Symbol;Acc:MGI:102503]	591.177	1.35847	0.228219	5.9525	2.64085e-09	9.49868e-08	721.592	930.662	899.442	373.457	340.177	281.732	850.565	331.789
11634	ENSMUSG00000064647	Gm23301		predicted gene, 23301 [Source:MGI Symbol;Acc:MGI:5453078]	8.76548	3.14038	1.19651	2.62461	0.00867475	0.0349145	16.8718	7.17734	23.2281	0	0	5.3157	15.7591	1.7719
11635	ENSMUSG00000064655	Gm25788		predicted gene, 25788 [Source:MGI Symbol;Acc:MGI:5455565]	5.20278	3.17341	1.15798	2.74047	0.00613518	0.0264836	15.5739	4.78489	7.74268	1.5791	0.77666	0.759385	9.36717	1.03838
11636	ENSMUSG00000064672	Gm22806		predicted gene, 22806 [Source:MGI Symbol;Acc:MGI:5452583]	13.1951	3.37418	0.961793	3.50822	0.000451117	0.00322608	46.7218	20.3358	5.16179	0.789549	3.8833	2.27816	24.0731	2.317
11638	ENSMUSG00000064899	Snord118		small nucleolar RNA, C/D box 118 [Source:MGI Symbol;Acc:MGI:3819519]	4.38019	3.35572	1.31076	2.56012	0.0104635	0.0406148	11.6805	8.37356	3.87134	1.5791	0.77666	0	7.97512	0.785253
11639	ENSMUSG00000064936	Gm23722		predicted gene, 23722 [Source:MGI Symbol;Acc:MGI:5453499]	11.2747	4.81509	1.13435	4.24481	2.1878e-05	0.000260651	35.0414	8.37356	21.9376	0	0.77666	1.51877	21.7842	0.765143
11642	ENSMUSG00000065147	Snora31		small nucleolar RNA, H/ACA box 31 [Source:MGI Symbol;Acc:MGI:3819500]	59.7415	4.71811	0.611767	7.71227	1.23602e-14	1.08394e-12	140.165	147.135	58.0701	0.789549	6.21328	6.07508	115.124	4.3593
11648	ENSMUSG00000065734	Snord49a		small nucleolar RNA, C/D box 49A [Source:MGI Symbol;Acc:MGI:3819538]	8.5023	3.60418	1.08492	3.32207	0.000893514	0.00567567	27.2544	9.56979	10.3236	0	3.10664	0.759385	15.7159	1.28867
11680	ENSMUSG00000066235	Pomgnt2	215494	protein O-linked mannose beta 1,4-N-acetylglucosaminyltransferase 2 [Source:MGI Symbol;Acc:MGI:2143424]	408.906	4.54155	1.09588	4.14421	3.40994e-05	0.000379668	1242.02	57.4187	1053.01	19.7387	34.173	47.0819	784.148	33.6645
11684	ENSMUSG00000066324	Impad1	242291	inositol monophosphatase domain containing 1 [Source:MGI Symbol;Acc:MGI:1915720]	1429.92	1.03984	0.304678	3.41293	0.00064268	0.00433713	1977.89	1206.99	2587.35	1031.15	952.961	823.174	1924.08	935.762
11688	ENSMUSG00000066363	Serpina3f	238393	serine (or cysteine) peptidase inhibitor, clade A, member 3F [Source:MGI Symbol;Acc:MGI:2182838]	37.6168	2.09848	0.656724	3.19538	0.00139645	0.00818302	128.485	28.7094	25.8089	15.791	14.7565	12.1502	61.0011	14.2326
11745	ENSMUSG00000067235	H2-Q10	15007	histocompatibility 2, Q region locus 10 [Source:MGI Symbol;Acc:MGI:95929]	11628.9	1.446	0.30898	4.67992	2.86989e-06	4.50836e-05	25077.9	11425.1	14536.9	6358.24	6495.21	5879.92	17013.3	6244.45
11760	ENSMUSG00000067586	S1pr3	13610	sphingosine-1-phosphate receptor 3 [Source:MGI Symbol;Acc:MGI:1339365]	88.8196	2.94537	0.42788	6.88364	5.83442e-12	3.44656e-10	229.716	155.509	86.46	22.1074	17.8632	21.2628	157.228	20.4111
11800	ENSMUSG00000068141	Gm10232		predicted pseudogene 10232 [Source:MGI Symbol;Acc:MGI:3641637]	7.13999	3.67551	1.10397	3.32935	0.000870487	0.00555498	19.4674	4.78489	15.4854	0.789549	1.55332	0.759385	13.2459	1.03408
11814	ENSMUSG00000068264	Ap5s1	69596	adaptor-related protein 5 complex, sigma 1 subunit [Source:MGI Symbol;Acc:MGI:1916846]	197.934	1.21793	0.299978	4.06005	4.90615e-05	0.000515487	307.585	190.199	332.935	102.641	129.702	124.539	276.907	118.961
11819	ENSMUSG00000068299	Nat8f4	75541	N-acetyltransferase 8 (GCN5-related) family member 4 [Source:MGI Symbol;Acc:MGI:1922791]	248.47	2.36907	0.593983	3.98846	6.65044e-05	0.000662859	702.125	132.781	414.234	27.6342	97.8591	116.186	416.38	80.5598
11826	ENSMUSG00000068396	Rpl34-ps1	619547	ribosomal protein L34, pseudogene 1 [Source:MGI Symbol;Acc:MGI:3704270]	48.5198	1.01634	0.364536	2.78805	0.00530259	0.023542	77.8697	55.0263	61.9415	35.5297	34.173	26.5785	64.9458	32.0937
11847	ENSMUSG00000068749	Psma5	26442	proteasome (prosome, macropain) subunit, alpha type 5 [Source:MGI Symbol;Acc:MGI:1347009]	1030.48	1.28795	0.284638	4.52487	6.04339e-06	8.61126e-05	1713.13	937.839	1735.65	622.954	616.668	556.629	1462.21	598.75
11869	ENSMUSG00000069114	Zbtb10	229055	zinc finger and BTB domain containing 10 [Source:MGI Symbol;Acc:MGI:2139883]	203.301	1.19588	0.252976	4.72724	2.27588e-06	3.70582e-05	320.563	234.46	294.222	135.013	108.732	126.817	283.082	123.521
11892	ENSMUSG00000069682	Gm10275		predicted pseudogene 10275 [Source:MGI Symbol;Acc:MGI:3704354]	27.1967	1.36469	0.47442	2.87653	0.0040207	0.0189171	25.9566	50.2414	41.2943	15.0014	13.9799	16.7065	39.1641	15.2293
11897	ENSMUSG00000069744	Psmb3	26446	proteasome (prosome, macropain) subunit, beta type 3 [Source:MGI Symbol;Acc:MGI:1347014]	990.631	1.07491	0.259151	4.14781	3.35676e-05	0.000374237	1309.51	988.08	1733.07	630.06	669.481	613.583	1343.55	637.708
11899	ENSMUSG00000069763	Tmem100	67888	transmembrane protein 100 [Source:MGI Symbol;Acc:MGI:1915138]	27.7381	3.05978	0.564649	5.41892	5.99615e-08	1.52942e-06	50.6153	66.9885	30.9707	7.89549	3.8833	6.07508	49.5248	5.95129
11917	ENSMUSG00000069919	Hba-a1	15122	hemoglobin alpha, adult chain 1 [Source:MGI Symbol;Acc:MGI:96015]	1883.11	1.19261	0.37207	3.20534	0.00134905	0.00796089	2212.8	3619.77	2027.29	885.085	781.32	1772.41	2619.95	1146.27
11921	ENSMUSG00000070002	Ell	13716	elongation factor RNA polymerase II [Source:MGI Symbol;Acc:MGI:109377]	692.972	1.35712	0.341474	3.97431	7.05833e-05	0.000698159	1500.29	788.311	702.003	338.717	342.507	486.007	996.868	389.077
11932	ENSMUSG00000070298	Trcg1	541610	taste receptor cell gene 1 [Source:MGI Symbol;Acc:MGI:3576664]	8.01211	4.28686	1.17555	3.64669	0.000265636	0.0020702	16.8718	10.766	18.0663	2.36865	0	0	15.2347	0.789549
11940	ENSMUSG00000070343	Gm10288		predicted gene 10288 [Source:MGI Symbol;Acc:MGI:3704227]	18.5513	1.62887	0.585218	2.78335	0.00538	0.0238049	36.3392	15.5509	32.2612	11.0537	6.98994	9.11262	28.0504	9.05208
11947	ENSMUSG00000070420	Zscan25	666311	zinc finger and SCAN domain containing 25 [Source:MGI Symbol;Acc:MGI:3647079]	130.312	1.98345	0.318974	6.21823	5.02791e-10	2.08126e-08	173.909	181.826	268.413	41.0566	55.9195	60.7508	208.049	52.5756
11950	ENSMUSG00000070436	Serpinh1	12406	serine (or cysteine) peptidase inhibitor, clade H, member 1 [Source:MGI Symbol;Acc:MGI:88283]	74.295	1.02621	0.368521	2.78469	0.00535797	0.0237507	121.996	77.7545	99.3644	36.3193	44.2696	66.0665	99.7049	48.8851
11958	ENSMUSG00000070522	Gm6505		predicted pseudogene 6505 [Source:MGI Symbol;Acc:MGI:3648080]	8.62237	5.93259	1.40757	4.21479	2.50016e-05	0.000292137	19.4674	9.56979	21.9376	0	0	0.759385	16.9916	0.253128
11966	ENSMUSG00000070639	Lrrc8b	433926	leucine rich repeat containing 8 family, member B [Source:MGI Symbol;Acc:MGI:2141353]	69.975	1.40018	0.449343	3.11605	0.0018329	0.0102139	89.5501	72.9696	141.949	58.4266	34.173	22.7816	101.49	38.4604
11969	ENSMUSG00000070645	Ren1	19701|19702	renin 1 structural [Source:MGI Symbol;Acc:MGI:97898]|renin 1 structural [Source:MGI Symbol;Acc:MGI:97898]	114.501	2.0736	0.521201	3.97851	6.93488e-05	0.000687948	72.6784	264.365	218.086	21.3178	54.3662	56.1945	185.043	43.9595
11970	ENSMUSG00000070661	Rnf186	66825	ring finger protein 186 [Source:MGI Symbol;Acc:MGI:1914075]	48.5197	2.33969	0.391696	5.97322	2.32615e-09	8.47427e-08	63.5936	80.147	99.3644	15.791	14.7565	17.4659	81.035	16.0045
12009	ENSMUSG00000071076	Jund	16478	jun D proto-oncogene [Source:MGI Symbol;Acc:MGI:96648]	826.375	2.3922	0.314209	7.61342	2.6693e-14	2.21526e-12	1907.81	1375.66	881.376	303.187	257.851	232.372	1388.28	264.47
12013	ENSMUSG00000071172	Srsf3	20383	serine/arginine-rich splicing factor 3 [Source:MGI Symbol;Acc:MGI:98285]	1455.76	1.81681	0.293383	6.19263	5.91697e-10	2.40252e-08	2495.72	1453.41	2854.47	610.321	584.048	736.604	2267.87	643.658
12015	ENSMUSG00000071177	Serpina1d	20703	serine (or cysteine) peptidase inhibitor, clade A, member 1D [Source:MGI Symbol;Acc:MGI:891968]	12763.4	1.26764	0.230677	5.49532	3.90003e-08	1.04655e-06	22526.4	15675.3	15906.1	8396.07	7139.83	6936.98	18035.9	7490.96
12035	ENSMUSG00000071369	Map3k5	26408	mitogen-activated protein kinase kinase kinase 5 [Source:MGI Symbol;Acc:MGI:1346876]	1421.4	1.27416	0.288222	4.42076	9.83534e-06	0.00013093	2519.08	1315.85	2198.92	896.928	711.42	886.203	2011.28	831.517
12051	ENSMUSG00000071637	Cebpd	12609	CCAAT/enhancer binding protein (C/EBP), delta [Source:MGI Symbol;Acc:MGI:103573]	399.314	2.66015	0.286809	9.27499	1.77639e-20	3.32106e-18	933.138	590.934	544.569	119.222	100.189	107.833	689.547	109.081
12061	ENSMUSG00000071655	Ubxn1	225896	UBX domain protein 1 [Source:MGI Symbol;Acc:MGI:1289301]	911.185	1.21472	0.220726	5.50331	3.72735e-08	1.00977e-06	1240.72	1453.41	1126.56	634.797	483.082	528.532	1273.57	548.804
12065	ENSMUSG00000071662	Polr2g	67710	polymerase (RNA) II (DNA directed) polypeptide G [Source:MGI Symbol;Acc:MGI:1914960]	117.564	1.13166	0.315953	3.58172	0.000341343	0.00255153	188.185	137.566	158.725	60.7953	62.9094	97.2013	161.492	73.6353
12067	ENSMUSG00000071691	Gm960	381196	predicted gene 960 [Source:MGI Symbol;Acc:MGI:2685806]	22.3089	1.77465	0.611269	2.90322	0.00369342	0.0177003	58.4023	15.5509	29.6803	9.47459	10.8732	9.87201	34.5445	10.0733
12071	ENSMUSG00000071714	Csf2rb2	12984	colony stimulating factor 2 receptor, beta 2, low-affinity (granulocyte-macrophage) [Source:MGI Symbol;Acc:MGI:1339760]	75.685	1.62445	0.551039	2.94798	0.00319859	0.0158652	212.844	51.4376	78.7173	22.1074	41.163	47.8413	114.333	37.0372
12078	ENSMUSG00000071796	6820431F20Rik		RIKEN cDNA 6820431F20 gene [Source:MGI Symbol;Acc:MGI:3694236]	86.595	1.17875	0.353656	3.33305	0.000859001	0.00550233	114.209	84.9319	161.306	63.1639	46.5996	49.36	120.149	53.0412
12081	ENSMUSG00000072082	Ccnf	12449	cyclin F [Source:MGI Symbol;Acc:MGI:102551]	145.395	1.89997	0.683093	2.78142	0.00541217	0.0239224	441.261	28.7094	218.086	86.0609	47.3762	50.8788	229.352	61.4386
12083	ENSMUSG00000072235	Tuba1a	22142	tubulin, alpha 1A [Source:MGI Symbol;Acc:MGI:98869]	31.7893	1.67797	0.575845	2.91392	0.00356922	0.0172509	67.4871	43.064	34.8421	8.68504	9.31992	27.3379	48.4644	15.1143
12084	ENSMUSG00000072244	Trim6	94088	tripartite motif-containing 6 [Source:MGI Symbol;Acc:MGI:2137352]	148.525	1.23367	0.290703	4.24373	2.19833e-05	0.000261723	198.568	200.966	225.828	77.3758	72.2294	116.186	208.454	88.597
12095	ENSMUSG00000072612	Gm10382		predicted gene 10382 [Source:MGI Symbol;Acc:MGI:3647829]	47.1699	3.63575	0.565575	6.42842	1.28934e-10	6.02625e-09	86.9545	72.9696	101.945	14.2119	4.65996	2.27816	87.2898	7.05
12105	ENSMUSG00000072692	Rpl37rt	100502825	ribosomal protein L37, retrotransposed [Source:MGI Symbol;Acc:MGI:3651519]	42.9493	1.03761	0.378632	2.7404	0.00613639	0.0264836	59.7001	47.8489	65.8128	26.8447	24.0765	33.4129	57.7873	28.1114
12123	ENSMUSG00000072941	Sod3	20657	superoxide dismutase 3, extracellular [Source:MGI Symbol;Acc:MGI:103181]	173.1	1.24669	0.253095	4.92579	8.40191e-07	1.56563e-05	253.076	226.086	251.637	90.0086	95.5291	122.261	243.6	102.6
12126	ENSMUSG00000072949	Acot1	26897	acyl-CoA thioesterase 1 [Source:MGI Symbol;Acc:MGI:1349396]	503.532	2.58551	0.44232	5.84533	5.05556e-09	1.72711e-07	460.729	708.164	1420.78	195.808	149.895	85.8105	863.225	143.838
12148	ENSMUSG00000073274	Gm14636		predicted gene 14636 [Source:MGI Symbol;Acc:MGI:3641976]	3.86966	3.81444	1.52165	2.50678	0.0121836	0.0455758	7.78697	3.58867	10.3236	0	0	1.51877	7.23307	0.506257
12152	ENSMUSG00000073409	H2-Q6	110557	histocompatibility 2, Q region locus 6 [Source:MGI Symbol;Acc:MGI:95935]	89.7011	2.25499	0.448278	5.03033	4.89625e-07	9.65237e-06	237.503	101.679	105.817	41.8461	21.7465	29.616	148.333	31.0695
12183	ENSMUSG00000073647	Gm10557		predicted gene 10557 [Source:MGI Symbol;Acc:MGI:3708638]	134.739	1.08959	0.391194	2.78529	0.00534804	0.023719	202.461	108.856	238.733	115.274	83.8792	59.232	183.35	86.1285
12195	ENSMUSG00000073771	Btbd19		BTB (POZ) domain containing 19 [Source:MGI Symbol;Acc:MGI:1925861]	264.853	3.22729	1.17429	2.74828	0.00599083	0.0260073	162.228	50.2414	1223.34	51.3207	44.2696	57.7133	478.605	51.1012
12210	ENSMUSG00000073917	Olfr665	258810	olfactory receptor 665 [Source:MGI Symbol;Acc:MGI:3030499]	3.66734	5.68167	2.00449	2.83446	0.00459026	0.0209649	11.6805	0	10.3236	0	0	0	7.33468	0
12211	ENSMUSG00000073940	Hbb-bt	101488143	hemoglobin, beta adult t chain [Source:MGI Symbol;Acc:MGI:5474850]	278.319	1.10012	0.356314	3.08751	0.00201842	0.0110062	279.033	555.048	304.546	142.908	151.449	236.928	379.542	177.095
12221	ENSMUSG00000074063	Osgin1	71839	oxidative stress induced growth inhibitor 1 [Source:MGI Symbol;Acc:MGI:1919089]	6289.38	3.62041	0.39323	9.20683	3.35891e-20	6.14464e-18	19521.9	7800.57	7576.22	719.279	1178.19	940.119	11632.9	945.864
12227	ENSMUSG00000074108	Rpl10-ps2		ribosomal protein L10, pseudogene 2 [Source:MGI Symbol;Acc:MGI:3648679]	9.09295	6.00935	1.43249	4.19504	2.72826e-05	0.000314258	25.9566	7.17734	20.6472	0	0.77666	0	17.927	0.258887
12239	ENSMUSG00000074183	Gsta1	14857	glutathione S-transferase, alpha 1 (Ya) [Source:MGI Symbol;Acc:MGI:1095417]	97.361	2.55624	0.545629	4.68494	2.80044e-06	4.41556e-05	224.524	65.7923	209.052	11.8432	36.503	36.4505	166.456	28.2656
12270	ENSMUSG00000074398	Gm15441		predicted gene 15441 [Source:MGI Symbol;Acc:MGI:3641753]	21.2827	3.67844	0.762478	4.82433	1.40475e-06	2.4537e-05	18.1696	37.0829	63.2319	0.789549	3.10664	5.3157	39.4948	3.07063
12296	ENSMUSG00000074607	Tox2	269389	TOX high mobility group box family member 2 [Source:MGI Symbol;Acc:MGI:3611233]	20.6134	3.62434	0.942055	3.84727	0.00011944	0.00107914	75.274	10.766	28.3898	0	6.21328	3.03754	38.1433	3.08361
12301	ENSMUSG00000074639	Rdh16f2	216454	RDH16 family member 2 [Source:MGI Symbol;Acc:MGI:3583955]	639.107	1.2217	0.423007	2.88812	0.00387547	0.0183658	844.886	718.93	1120.11	185.544	648.511	316.664	894.641	383.573
12309	ENSMUSG00000074743	Thbd	21824	thrombomodulin [Source:MGI Symbol;Acc:MGI:98736]	274.497	3.77814	0.380968	9.91722	3.5039e-23	8.8973e-21	777.399	391.165	366.487	48.952	31.843	31.1348	511.684	37.31
12357	ENSMUSG00000075254	Heg1	77446	heart development protein with EGF-like domains 1 [Source:MGI Symbol;Acc:MGI:1924696]	500.666	1.08766	0.291884	3.72634	0.000194283	0.00158606	843.588	450.976	748.459	288.185	306.004	366.783	681.008	320.324
12366	ENSMUSG00000075327	Zbtb2	381990	zinc finger and BTB domain containing 2 [Source:MGI Symbol;Acc:MGI:2685949]	133.619	1.6478	0.298803	5.51469	3.49399e-08	9.52617e-07	263.459	166.275	178.082	67.1117	66.7927	59.9914	202.605	64.6319
12390	ENSMUSG00000075602	Ly6a	110454	lymphocyte antigen 6 complex, locus A [Source:MGI Symbol;Acc:MGI:107527]	59.241	2.99056	0.454404	6.58127	4.66455e-11	2.35484e-09	115.507	80.147	120.012	18.9492	14.7565	6.07508	105.222	13.2603
12404	ENSMUSG00000076438	Oxct2b	353371	3-oxoacid CoA transferase 2B [Source:MGI Symbol;Acc:MGI:2664115]	6.87927	6.5894	1.64149	4.01427	5.96295e-05	0.000605297	29.85	2.39245	9.03313	0	0	0	13.7585	0
12406	ENSMUSG00000076498	Trbc2		T cell receptor beta, constant 2 [Source:MGI Symbol;Acc:MGI:4835227]	16.0889	3.69054	1.04404	3.53487	0.000407982	0.00296244	5.19131	75.3621	9.03313	1.5791	2.32998	3.03754	29.8622	2.31554
12409	ENSMUSG00000076614	Ighg1		immunoglobulin heavy constant gamma 1 (G1m marker) [Source:MGI Symbol;Acc:MGI:96446]	7.17387	3.04899	1.22334	2.49236	0.0126898	0.0471173	15.5739	21.532	1.29045	2.36865	0	2.27816	12.7988	1.54893
12417	ENSMUSG00000077704	Snord89		small nucleolar RNA, C/D box 89 [Source:MGI Symbol;Acc:MGI:3819562]	13.5077	4.31305	1.03994	4.14738	3.36301e-05	0.000374688	54.5088	7.17734	15.4854	1.5791	0.77666	1.51877	25.7238	1.29151
12418	ENSMUSG00000077737	Snord72		small nucleolar RNA, C/D box 72 [Source:MGI Symbol;Acc:MGI:3819555]	6.07498	3.42618	1.14861	2.98289	0.00285539	0.0145055	16.8718	3.58867	12.9045	0.789549	0.77666	1.51877	11.1216	1.02833
12537	ENSMUSG00000079014	Serpina3i	628900	serine (or cysteine) peptidase inhibitor, clade A, member 3I [Source:MGI Symbol;Acc:MGI:2182841]	29.285	1.93431	0.478818	4.03975	5.35075e-05	0.000554399	64.8914	38.2791	36.1325	11.0537	13.2032	12.1502	46.4344	12.1357
12540	ENSMUSG00000079018	Ly6c1	17067	lymphocyte antigen 6 complex, locus C1 [Source:MGI Symbol;Acc:MGI:96882]	8.20848	3.89333	1.15429	3.37291	0.000743779	0.00489106	12.9783	4.78489	28.3898	1.5791	0	1.51877	15.3843	1.03262
12542	ENSMUSG00000079036	Alkbh1	211064|654309	alkB homolog 1, histone H2A dioxygenase [Source:MGI Symbol;Acc:MGI:2384034]|alkB homolog 1, histone H2A dioxygenase [Source:MGI Symbol;Acc:MGI:2384034]	280.813	1.96944	0.353664	5.56866	2.56704e-08	7.31541e-07	458.133	259.58	624.577	100.273	105.626	136.689	447.43	114.196
12557	ENSMUSG00000079111	Kdelr2	66913	KDEL (Lys-Asp-Glu-Leu) endoplasmic reticulum protein retention receptor 2 [Source:MGI Symbol;Acc:MGI:1914163]	2508.96	1.72135	0.275053	6.25825	3.89325e-10	1.66422e-08	5020	2669.97	3861.02	1144.85	1060.92	1297.03	3850.33	1167.6
12604	ENSMUSG00000079507	H2-Q1	15006	histocompatibility 2, Q region locus 1 [Source:MGI Symbol;Acc:MGI:95928]	91.4883	1.0332	0.375753	2.74967	0.0059655	0.0259211	179.1	81.3432	108.398	63.9535	66.0161	50.1194	122.947	60.0297
12620	ENSMUSG00000079652	Fam71f2	245884	family with sequence similarity 71, member F2 [Source:MGI Symbol;Acc:MGI:2141439]	38.56	5.60181	0.928758	6.03151	1.62434e-09	6.07361e-08	88.2523	11.9622	126.464	2.36865	1.55332	0.759385	75.5595	1.56045
12633	ENSMUSG00000080242	Atp6v0c-ps2		ATPase, H+ transporting, lysosomal V0 subunit C, pseudogene 2 [Source:MGI Symbol;Acc:MGI:2151816]	440.099	1.30841	0.282355	4.63392	3.58798e-06	5.45996e-05	726.784	431.837	722.65	215.547	275.714	268.063	627.09	253.108
12665	ENSMUSG00000081487	Gm13689		predicted gene 13689 [Source:MGI Symbol;Acc:MGI:3652061]	6.46508	2.87975	0.969703	2.96972	0.00298071	0.0149911	14.2761	9.56979	10.3236	0.789549	1.55332	2.27816	11.3898	1.54034
12678	ENSMUSG00000081824	BC002163		cDNA sequence BC002163 [Source:MGI Symbol;Acc:MGI:3612445]	32.3183	3.16926	0.858959	3.68965	0.000224559	0.00180081	5.19131	62.2036	107.107	4.73729	10.8732	3.79693	58.1673	6.46915
12680	ENSMUSG00000081895	Rpl17-ps10		ribosomal protein L17, pseudogene 10 [Source:MGI Symbol;Acc:MGI:3642871]	73.018	1.25956	0.327525	3.84571	0.000120205	0.00108548	97.3371	113.641	98.074	32.3715	45.0463	51.6382	103.017	43.0187
12690	ENSMUSG00000082141	Gm11212		predicted gene 11212 [Source:MGI Symbol;Acc:MGI:3651243]	21.9328	3.7301	1.03485	3.60448	0.000312779	0.00237241	35.0414	4.78489	82.5886	0	3.10664	6.07508	40.805	3.06057
12697	ENSMUSG00000082361	Btc	12223	betacellulin, epidermal growth factor family member [Source:MGI Symbol;Acc:MGI:99439]	162.927	2.82807	0.508949	5.55668	2.74958e-08	7.77055e-07	246.587	114.837	495.532	25.2656	52.8129	42.5256	285.652	40.2013
12731	ENSMUSG00000083327	Vcp-rs		valosin containing protein, related sequence [Source:MGI Symbol;Acc:MGI:894298]	1465.59	1.04228	0.214545	4.85808	1.18527e-06	2.11115e-05	2005.14	1666.34	2247.96	944.301	1066.35	863.421	1973.15	958.025
12740	ENSMUSG00000083621	Gm14586		predicted gene 14586 [Source:MGI Symbol;Acc:MGI:3705507]	16.0777	1.52549	0.617131	2.47191	0.0134395	0.049309	29.85	27.5131	14.1949	11.8432	6.98994	6.07508	23.8527	8.30275
12753	ENSMUSG00000083899	Gm12346		predicted gene 12346 [Source:MGI Symbol;Acc:MGI:3649810]	21.3279	1.7922	0.553725	3.23663	0.0012095	0.00726853	37.637	19.1396	42.5848	7.89549	9.31992	11.3908	33.1204	9.5354
12755	ENSMUSG00000083992	Gm11478		predicted gene 11478 [Source:MGI Symbol;Acc:MGI:3650888]	15.3304	1.97584	0.608308	3.24809	0.00116182	0.0070568	32.4457	21.532	19.3567	7.89549	5.43662	5.3157	24.4448	6.21594
12768	ENSMUSG00000084319	Tpt1-ps3		tumor protein, translationally-controlled, pseudogene 3 [Source:MGI Symbol;Acc:MGI:2664997]	101.356	1.58152	0.358502	4.41147	1.02673e-05	0.00013583	175.207	105.268	175.501	42.6357	41.9396	67.5853	151.992	50.7202
12772	ENSMUSG00000084416	Rpl10a-ps1		ribosomal protein L10A, pseudogene 1 [Source:MGI Symbol;Acc:MGI:3705885]	107.864	1.1025	0.279412	3.9458	7.95345e-05	0.000769255	168.718	123.211	149.692	73.4281	68.3461	63.7884	147.207	68.5208
12776	ENSMUSG00000084497	Gm22107		predicted gene, 22107 [Source:MGI Symbol;Acc:MGI:5451884]	36.7583	5.53657	0.867305	6.38364	1.72924e-10	7.8758e-09	110.315	84.9319	20.6472	0.789549	3.10664	0.759385	71.9648	1.55186
12779	ENSMUSG00000084616	Gm25047		predicted gene, 25047 [Source:MGI Symbol;Acc:MGI:5454824]	12.093	2.06419	0.725088	2.84682	0.00441584	0.0203177	25.9566	11.9622	20.6472	7.10594	2.32998	4.55631	19.522	4.66408
12800	ENSMUSG00000084899	Gm15344		predicted gene 15344 [Source:MGI Symbol;Acc:MGI:3708098]	48.9867	2.29823	0.617361	3.72268	0.000197122	0.00160692	127.187	20.3358	96.7835	19.7387	11.6499	18.2252	81.4355	16.538
12805	ENSMUSG00000084923	Gm15611		predicted gene 15611 [Source:MGI Symbol;Acc:MGI:3783057]	29.8052	2.39966	0.724641	3.31151	0.000927933	0.00586438	72.6784	62.2036	15.4854	2.36865	12.4266	13.6689	50.1224	9.48805
12823	ENSMUSG00000085091	Egfros		epidermal growth factor receptor, opposite strand [Source:MGI Symbol;Acc:MGI:2443051]	50.3259	1.80429	0.542657	3.32492	0.000884451	0.00562736	137.57	43.064	54.1988	18.1596	16.3099	32.6536	78.2775	22.3743
12831	ENSMUSG00000085156	Snhg15		small nucleolar RNA host gene 15 [Source:MGI Symbol;Acc:MGI:3650059]	38.8708	1.47095	0.474373	3.10083	0.00192981	0.0106562	51.9131	38.2791	81.2982	15.791	17.0865	28.8566	57.1635	20.578
12851	ENSMUSG00000085335	Gm13684		predicted gene 13684 [Source:MGI Symbol;Acc:MGI:3649340]	5.29037	3.65264	1.2779	2.85831	0.00425898	0.0197865	16.8718	4.78489	7.74268	0.789549	1.55332	0	9.79978	0.780956
12853	ENSMUSG00000085385	Snhg17		small nucleolar RNA host gene 17 [Source:MGI Symbol;Acc:MGI:1915358]	303.74	1.91423	0.483173	3.96178	7.43916e-05	0.000727526	506.153	180.63	753.621	79.7445	173.195	129.095	480.135	127.345
12869	ENSMUSG00000085505	Gm12868		predicted gene 12868 [Source:MGI Symbol;Acc:MGI:3651004]	4.17817	4.86321	1.59709	3.04504	0.00232647	0.0123188	12.9783	3.58867	7.74268	0	0	0.759385	8.10321	0.253128
12892	ENSMUSG00000085795	Zfp703	353310	zinc finger protein 703 [Source:MGI Symbol;Acc:MGI:2662729]	111.141	1.32448	0.476311	2.7807	0.00542421	0.0239671	198.568	57.4187	220.666	65.5326	73.7827	50.8788	158.884	63.398
12902	ENSMUSG00000085894	Gm15832		predicted gene 15832 [Source:MGI Symbol;Acc:MGI:3834078]	159.688	4.21668	0.43941	9.59624	8.29126e-22	1.74147e-19	404.922	150.724	353.583	20.5283	12.4266	15.9471	303.076	16.3006
12935	ENSMUSG00000086290	Snhg12		small nucleolar RNA host gene 12 [Source:MGI Symbol;Acc:MGI:1916721]	178.896	1.49826	0.325045	4.6094	4.03842e-06	6.05593e-05	342.627	165.079	285.189	92.3772	92.4225	95.6825	264.298	93.4941
12969	ENSMUSG00000086567	Gm2830		predicted gene 2830 [Source:MGI Symbol;Acc:MGI:3781002]	25.6315	1.56059	0.516333	3.02245	0.00250734	0.013065	36.3392	35.8867	42.5848	20.5283	10.0966	8.35324	38.2702	12.9927
12981	ENSMUSG00000086683	Gm12867		predicted gene 12867 [Source:MGI Symbol;Acc:MGI:3651003]	10.2774	3.89737	1.10447	3.52873	0.000417562	0.0030204	35.0414	5.98112	16.7758	0	3.10664	0.759385	19.2661	1.28867
12996	ENSMUSG00000086841	2410006H16Rik	69221	RIKEN cDNA 2410006H16 gene [Source:MGI Symbol;Acc:MGI:1916471]	264.167	2.74685	0.38188	7.19296	6.34026e-13	4.29748e-11	600.894	239.245	539.407	79.7445	52.8129	72.901	459.849	68.4861
13001	ENSMUSG00000086894	Gm15708		predicted gene 15708 [Source:MGI Symbol;Acc:MGI:3783149]	49.8039	2.19927	0.447326	4.91648	8.81147e-07	1.62768e-05	112.911	70.5772	61.9415	19.7387	10.8732	22.7816	81.8099	17.7978
13011	ENSMUSG00000087006	Gm13889	620695	predicted gene 13889 [Source:MGI Symbol;Acc:MGI:3652053]	16.6374	2.71071	0.69415	3.90508	9.41941e-05	0.000882933	45.424	17.9433	23.2281	4.73729	6.21328	2.27816	28.8651	4.40958
13061	ENSMUSG00000087445	Gm14286		predicted gene 14286 [Source:MGI Symbol;Acc:MGI:3650190]	38.4034	2.44537	0.464945	5.25948	1.44461e-07	3.36212e-06	81.7632	40.6716	72.265	13.4223	12.4266	9.87201	64.8999	11.907
13066	ENSMUSG00000087502	Gm16091		predicted gene 16091 [Source:MGI Symbol;Acc:MGI:3802007]	16.2171	2.00792	0.656968	3.05634	0.0022406	0.0119684	36.3392	11.9622	29.6803	4.73729	6.98994	7.59385	25.9939	6.44036
13069	ENSMUSG00000087528	9830144P21Rik		RIKEN cDNA 9830144P21 gene [Source:MGI Symbol;Acc:MGI:3041171]	202.677	3.84575	0.326083	11.7938	4.20281e-32	2.10301e-29	477.601	344.512	314.869	31.582	18.6398	28.8566	378.994	26.3595
13073	ENSMUSG00000087552	Gm15819		predicted gene 15819 [Source:MGI Symbol;Acc:MGI:3802175]	4.33577	4.92065	1.68515	2.92	0.00350031	0.0170047	15.5739	8.37356	1.29045	0	0.77666	0	8.41265	0.258887
13078	ENSMUSG00000087590	Epb41l4aos	69749	erythrocyte membrane protein band 4.1 like 4a, opposite strand [Source:MGI Symbol;Acc:MGI:1916999]	59.7795	1.27595	0.454987	2.80436	0.00504173	0.02262	92.1458	43.064	118.721	43.4252	25.6298	35.6911	84.6437	34.9154
13088	ENSMUSG00000087684	1200007C13Rik		RIKEN cDNA 1200007C13 gene [Source:MGI Symbol;Acc:MGI:1921369]	56.6419	2.52367	0.560661	4.50125	6.75563e-06	9.52225e-05	184.292	56.2225	49.037	14.2119	17.8632	18.2252	96.517	16.7668
13092	ENSMUSG00000087700	Gm15283		predicted gene 15283 [Source:MGI Symbol;Acc:MGI:3705161]	24.07	3.51324	0.729194	4.81797	1.45027e-06	2.51257e-05	85.6566	23.9245	23.2281	3.94775	3.10664	4.55631	44.2697	3.87023
13103	ENSMUSG00000088758	Gm24898		predicted gene, 24898 [Source:MGI Symbol;Acc:MGI:5454675]	17.5169	4.2084	0.812758	5.17793	2.24363e-07	4.89999e-06	31.1479	46.6527	21.9376	0.789549	0.77666	3.79693	33.2461	1.78771
13109	ENSMUSG00000089371	Mir1938		microRNA 1938 [Source:MGI Symbol;Acc:MGI:3836976]	4.85278	6.08806	1.61319	3.77394	0.000160689	0.00136146	16.8718	8.37356	3.87134	0	0	0	9.70556	0
13111	ENSMUSG00000089542	Gm25835		predicted gene, 25835 [Source:MGI Symbol;Acc:MGI:5455612]	16.2232	2.48943	0.658016	3.78324	0.0001548	0.00132578	35.0414	17.9433	29.6803	2.36865	6.98994	5.3157	27.555	4.89143
13125	ENSMUSG00000089789	Rdh1	107605	retinol dehydrogenase 1 (all trans) [Source:MGI Symbol;Acc:MGI:1195275]	10.0289	4.63074	1.23944	3.73616	0.000186853	0.00153869	41.5305	5.98112	10.3236	1.5791	0	0.759385	19.2784	0.779494
13127	ENSMUSG00000089809	Rasgef1b	320292	RasGEF domain family, member 1B [Source:MGI Symbol;Acc:MGI:2443755]	813.289	1.1724	0.397908	2.94641	0.00321491	0.0159229	1683.28	656.727	1040.1	731.912	408.523	359.189	1126.7	499.875
13130	ENSMUSG00000089820	Gm15775		predicted gene 15775 [Source:MGI Symbol;Acc:MGI:3783216]	7.20461	2.57602	0.918863	2.80348	0.00505538	0.0226633	15.5739	5.98112	15.4854	1.5791	2.32998	2.27816	12.3468	2.06241
13133	ENSMUSG00000089829	Gm16565		predicted gene 16565 [Source:MGI Symbol;Acc:MGI:4414985]	7.31938	4.15766	1.21616	3.41869	0.00062924	0.00425826	5.19131	13.1585	23.2281	1.5791	0	0.759385	13.8593	0.779494
13143	ENSMUSG00000089886	Gm16184		predicted gene 16184 [Source:MGI Symbol;Acc:MGI:3802154]	17.8751	4.74272	0.981184	4.83366	1.34043e-06	2.36319e-05	20.7652	15.5509	67.1033	0	1.55332	2.27816	34.4731	1.27716
13153	ENSMUSG00000090021	Gm6493		predicted gene 6493 [Source:MGI Symbol;Acc:MGI:3644797]	154.345	3.56622	0.586935	6.07602	1.23206e-09	4.72094e-08	414.007	196.181	243.895	6.31639	16.3099	49.36	284.694	23.9954
13177	ENSMUSG00000090213	Tmem189	407243	transmembrane protein 189 [Source:MGI Symbol;Acc:MGI:2142624]	92.2311	1.42247	0.288881	4.92405	8.47721e-07	1.57793e-05	144.059	136.369	122.592	45.7938	58.2495	46.3225	134.34	50.1219
13192	ENSMUSG00000090387	Gm17056		predicted gene 17056 [Source:MGI Symbol;Acc:MGI:4937883]	108.405	8.71445	1.54738	5.63175	1.78394e-08	5.30597e-07	168.718	31.1018	449.076	0	0.77666	0.759385	216.298	0.512015
13200	ENSMUSG00000090582	Gm17024		predicted gene 17024 [Source:MGI Symbol;Acc:MGI:4937851]	529.585	5.10663	0.490412	10.4129	2.16449e-25	7.22049e-23	1762.45	654.334	671.033	50.5311	19.4165	19.744	1029.27	29.8972
13204	ENSMUSG00000090628	Gm17083		predicted gene 17083 [Source:MGI Symbol;Acc:MGI:4937910]	19.287	1.65956	0.608402	2.72774	0.00637697	0.0273485	20.7652	32.298	34.8421	10.2641	3.8833	13.6689	29.3018	9.27212
13208	ENSMUSG00000090698	Apold1	381823	apolipoprotein L domain containing 1 [Source:MGI Symbol;Acc:MGI:2685921]	79.3123	4.00782	0.388497	10.3162	5.95209e-25	1.94736e-22	147.952	171.06	129.045	7.10594	9.31992	11.3908	149.352	9.27221
13212	ENSMUSG00000090778	Gm3235		predicted gene 3235 [Source:MGI Symbol;Acc:MGI:3781413]	4.39366	4.93703	1.57791	3.12884	0.00175499	0.00988662	10.3826	3.58867	11.614	0	0.77666	0	8.52844	0.258887
13213	ENSMUSG00000090779	Gm17110		predicted gene 17110 [Source:MGI Symbol;Acc:MGI:4937937]	4.68113	6.03417	1.5814	3.81572	0.000135786	0.0011951	12.9783	4.78489	10.3236	0	0	0	9.36225	0
13216	ENSMUSG00000090862	Rps13	68052	ribosomal protein S13 [Source:MGI Symbol;Acc:MGI:1915302]	1140.5	1.04543	0.23288	4.48914	7.15118e-06	0.000100052	1549.61	1221.34	1838.89	679.802	735.497	817.858	1536.61	744.385
13224	ENSMUSG00000090946	Ccdc71l	72123	coiled-coil domain containing 71 like [Source:MGI Symbol;Acc:MGI:1919373]	140.404	2.2131	0.642782	3.44301	0.000575286	0.00396249	356.903	41.8678	294.222	52.8998	72.2294	24.3003	230.997	49.8098
13227	ENSMUSG00000091021	Gm17300		predicted gene, 17300 [Source:MGI Symbol;Acc:MGI:4936934]	39.4763	1.66502	0.510223	3.26331	0.00110118	0.00677063	38.9348	43.064	98.074	24.476	18.6398	13.6689	60.0243	18.9283
13230	ENSMUSG00000091119	Ccdc152	100039139	coiled-coil domain containing 152 [Source:MGI Symbol;Acc:MGI:3641617]	388.098	1.35281	0.258777	5.22771	1.71622e-07	3.88789e-06	504.855	465.331	703.294	241.602	188.728	224.778	557.827	218.369
13235	ENSMUSG00000091285	Gm17430		predicted gene, 17430 [Source:MGI Symbol;Acc:MGI:4937064]	35.2764	4.31559	0.686973	6.28203	3.34183e-10	1.44668e-08	111.613	38.2791	51.6179	6.31639	1.55332	2.27816	67.1701	3.38262
13244	ENSMUSG00000091498	Mpc1-ps		mitochondrial pyruvate carrier 1, pseudogene [Source:MGI Symbol;Acc:MGI:3781628]	20.8103	2.44098	0.767077	3.18218	0.0014617	0.00848337	57.1044	41.8678	6.45224	8.68504	5.43662	5.3157	35.1415	6.47912
13249	ENSMUSG00000091553	Serpina3e-ps		serine (or cysteine) peptidase inhibitor, clade A, member 3E, pseudogene [Source:MGI Symbol;Acc:MGI:2182837]	10.2515	2.23129	0.868059	2.57044	0.010157	0.0396787	28.5522	13.1585	9.03313	0.789549	4.65996	5.3157	16.9146	3.5884
13251	ENSMUSG00000091586	Cyp4f17	208285	cytochrome P450, family 4, subfamily f, polypeptide 17 [Source:MGI Symbol;Acc:MGI:3646233]	702.236	3.05812	0.419097	7.29692	2.94431e-13	2.14066e-11	2201.12	648.353	912.346	142.908	153.779	154.915	1253.94	150.534
13254	ENSMUSG00000091705	H2-Q2	15013	histocompatibility 2, Q region locus 2 [Source:MGI Symbol;Acc:MGI:95931]	18.1538	3.86215	1.21695	3.17364	0.00150543	0.00869376	93.4436	7.17734	1.29045	2.36865	3.8833	0.759385	33.9705	2.33711
13269	ENSMUSG00000091971	Hspa1a	193740	heat shock protein 1A [Source:MGI Symbol;Acc:MGI:96244]	24.4195	2.23935	0.8772	2.55284	0.0106849	0.0412204	101.231	11.9622	7.74268	8.68504	8.54326	8.35324	40.3118	8.52718
13280	ENSMUSG00000092187	Gm20457		predicted gene 20457 [Source:MGI Symbol;Acc:MGI:5141922]	23.8227	1.95968	0.62785	3.12125	0.00180085	0.0100749	31.1479	32.298	50.3274	3.94775	6.98994	18.2252	37.9244	9.72098
13287	ENSMUSG00000092323	BB365896		expressed sequence BB365896 [Source:MGI Symbol;Acc:MGI:3034340]	19.4498	2.87677	0.908539	3.16637	0.00154354	0.00887771	3.89348	72.9696	25.8089	7.10594	3.8833	3.03754	34.224	4.67559
13297	ENSMUSG00000092500	Gm20400		predicted gene 20400 [Source:MGI Symbol;Acc:MGI:5141865]	12.2976	3.65241	0.857685	4.25845	2.05853e-05	0.000247154	12.9783	17.9433	37.423	2.36865	1.55332	1.51877	22.7815	1.81358
13307	ENSMUSG00000092867	Mir3058		microRNA 3058 [Source:MGI Symbol;Acc:MGI:4834226]	28.6734	3.78272	0.778672	4.85791	1.1863e-06	2.11115e-05	94.7414	51.4376	14.1949	6.31639	1.55332	3.79693	53.458	3.88888
13308	ENSMUSG00000092887	Snord53		small nucleolar RNA, C/D box 53 [Source:MGI Symbol;Acc:MGI:3819542]	5.84029	4.44989	1.7026	2.61358	0.00896	0.035859	0	16.7471	16.7758	0	0	1.51877	11.1743	0.506257
13322	ENSMUSG00000093798	Gm8355		predicted pseudogene 8355 [Source:MGI Symbol;Acc:MGI:3645191]	50.6858	2.94049	0.583173	5.04223	4.60146e-07	9.1454e-06	140.165	34.6905	94.2027	18.1596	8.54326	8.35324	89.6862	11.6854
13324	ENSMUSG00000093904	Tomm20	67952	translocase of outer mitochondrial membrane 20 [Source:MGI Symbol;Acc:MGI:1915202]	840.979	1.14796	0.240086	4.78145	1.74038e-06	2.9728e-05	1152.47	894.775	1429.82	513.207	514.925	540.682	1159.02	522.938
13326	ENSMUSG00000093930	Hmgcs1	208715	3-hydroxy-3-methylglutaryl-Coenzyme A synthase 1 [Source:MGI Symbol;Acc:MGI:107592]	6272.31	1.36364	0.494014	2.76033	0.00577429	0.025241	16838	6800.53	3463.56	2593.67	3014.22	4923.85	9034.04	3510.58
13328	ENSMUSG00000094092	Gm15921		predicted gene 15921 [Source:MGI Symbol;Acc:MGI:3801933]	5.39028	3.68487	1.21687	3.02817	0.00246042	0.012879	9.0848	13.1585	7.74268	1.5791	0.77666	0	9.99531	0.785253
13336	ENSMUSG00000094388	Gm8783		predicted pseudogene 8783 [Source:MGI Symbol;Acc:MGI:3646027]	70.882	1.86486	0.435403	4.28307	1.84335e-05	0.000223687	160.931	100.483	72.265	27.6342	42.7163	21.2628	111.226	30.5378
13369	ENSMUSG00000095258	Gm10593		predicted gene 10593 [Source:MGI Symbol;Acc:MGI:3710526]	4.37558	3.35851	1.2698	2.64491	0.00817118	0.0333869	9.0848	8.37356	6.45224	0.789549	1.55332	0	7.9702	0.780956
13385	ENSMUSG00000095562	Gm21887		predicted gene, 21887 [Source:MGI Symbol;Acc:MGI:5434051]	81.9705	1.71995	0.466137	3.6898	0.000224434	0.00180081	153.144	52.6338	171.629	30.0029	39.6096	44.8037	125.802	38.1387
13386	ENSMUSG00000095567	Noc2l	57741	NOC2 like nucleolar associated transcriptional repressor [Source:MGI Symbol;Acc:MGI:1931051]	474.766	1.32207	0.333027	3.96986	7.19143e-05	0.000709262	822.823	372.025	840.081	273.184	264.064	276.416	678.31	271.221
13405	ENSMUSG00000096403	Gm9825		predicted gene 9825 [Source:MGI Symbol;Acc:MGI:3708729]	205.24	2.13228	0.364383	5.85176	4.86411e-09	1.67178e-07	417.901	175.845	409.072	75.7967	76.8893	75.9385	334.272	76.2082
13411	ENSMUSG00000096592	Gm15801		predicted gene 15801 [Source:MGI Symbol;Acc:MGI:3779625]	50.7289	2.23169	0.498807	4.47407	7.67461e-06	0.000106067	116.805	82.5394	51.6179	10.2641	27.9597	15.1877	83.6539	17.8039
13413	ENSMUSG00000096617	Gm5559		predicted gene 5559 [Source:MGI Symbol;Acc:MGI:3779498]	44.3198	1.14789	0.3842	2.98773	0.00281054	0.0143203	50.6153	69.3809	63.2319	21.3178	27.9597	33.4129	61.0761	27.5635
13421	ENSMUSG00000096768	Gm47283	170942	predicted gene, 47283 [Source:MGI Symbol;Acc:MGI:6096131]	159.78	1.4924	0.463757	3.21806	0.00129059	0.00767186	228.418	95.6979	383.263	76.5863	104.849	69.8634	235.793	83.7663
13450	ENSMUSG00000097039	Pvt1		Pvt1 oncogene [Source:MGI Symbol;Acc:MGI:97824]	46.5028	1.81381	0.489383	3.70632	0.00021029	0.00169961	107.72	50.2414	59.3606	16.5805	13.9799	31.1348	72.4406	20.5651
13487	ENSMUSG00000097195	Snhg5		small nucleolar RNA host gene 5 [Source:MGI Symbol;Acc:MGI:1919905]	265.411	3.20354	0.490771	6.52756	6.68505e-11	3.2966e-09	698.231	177.041	561.345	43.4252	35.7263	76.6979	478.872	51.9498
13489	ENSMUSG00000097203	4732419C18Rik		RIKEN cDNA 4732419C18 gene [Source:MGI Symbol;Acc:MGI:3045379]	38.9591	1.0548	0.398606	2.64621	0.00813989	0.0333054	50.6153	47.8489	59.3606	20.5283	32.6197	22.7816	52.6083	25.3098
13493	ENSMUSG00000097219	Gm26551		predicted gene, 26551 [Source:MGI Symbol;Acc:MGI:5477045]	4.06462	3.8689	1.46709	2.63712	0.0083614	0.0339424	9.0848	5.98112	7.74268	1.5791	0	0	7.60287	0.526366
13495	ENSMUSG00000097234	Gm26518		predicted gene, 26518 [Source:MGI Symbol;Acc:MGI:5477012]	12.0675	2.27084	0.746601	3.04158	0.00235343	0.0124229	18.1696	9.56979	32.2612	3.94775	4.65996	3.79693	20.0002	4.13488
13497	ENSMUSG00000097242	Gm16907		predicted gene, 16907 [Source:MGI Symbol;Acc:MGI:4439831]	34.2988	2.44623	0.585806	4.17584	2.9689e-05	0.000337556	99.9328	44.2603	29.6803	14.2119	10.8732	6.83447	57.9578	10.6399
13500	ENSMUSG00000097263	Gm26804		predicted gene, 26804 [Source:MGI Symbol;Acc:MGI:5477298]	23.9913	3.22525	0.687163	4.69357	2.68476e-06	4.2608e-05	45.424	22.7282	61.9415	3.94775	1.55332	8.35324	43.3646	4.6181
13544	ENSMUSG00000097417	Gm26669		predicted gene, 26669 [Source:MGI Symbol;Acc:MGI:5477163]	25.4833	2.32519	0.676532	3.43693	0.000588358	0.00402644	66.1892	40.6716	20.6472	2.36865	10.8732	12.1502	42.5027	8.46402
13549	ENSMUSG00000097442	Gm26632		predicted gene, 26632 [Source:MGI Symbol;Acc:MGI:5477126]	9.95549	4.20333	1.07387	3.91418	9.07109e-05	0.000856418	23.3609	19.1396	14.1949	0	0	3.03754	18.8985	1.01251
13554	ENSMUSG00000097472	Gm26586		predicted gene, 26586 [Source:MGI Symbol;Acc:MGI:5477080]	8.89184	2.9174	0.878205	3.322	0.000893735	0.00567567	19.4674	9.56979	18.0663	3.1582	2.32998	0.759385	15.7012	2.08252
13566	ENSMUSG00000097537	2610020C07Rik		RIKEN cDNA 2610020C07 gene [Source:MGI Symbol;Acc:MGI:1917168]	16.9713	1.75271	0.612165	2.86314	0.00419471	0.0195627	38.9348	21.532	18.0663	10.2641	5.43662	7.59385	26.1777	7.76487
13567	ENSMUSG00000097554	Gm26825		predicted gene, 26825 [Source:MGI Symbol;Acc:MGI:5477319]	59.6088	2.82071	0.508483	5.5473	2.90119e-08	8.13147e-07	145.357	46.6527	121.302	18.1596	16.3099	9.87201	104.437	14.7805
13574	ENSMUSG00000097579	Gm26799		predicted gene, 26799 [Source:MGI Symbol;Acc:MGI:5477293]	7.91715	2.72539	1.08573	2.51018	0.0120668	0.0452487	28.5522	2.39245	10.3236	2.36865	3.10664	0.759385	13.7561	2.07822
13588	ENSMUSG00000097667	Gm26764		predicted gene, 26764 [Source:MGI Symbol;Acc:MGI:5477258]	13.251	2.12851	0.800506	2.65896	0.00783821	0.0322873	19.4674	15.5509	29.6803	9.47459	0.77666	4.55631	21.5662	4.93585
13610	ENSMUSG00000097815	Gm26809		predicted gene, 26809 [Source:MGI Symbol;Acc:MGI:5477303]	755.87	2.38515	0.247881	9.62216	6.4464e-22	1.37091e-19	1088.88	1179.48	1538.21	218.705	291.247	218.703	1268.86	242.885
13611	ENSMUSG00000097819	Gm26813		predicted gene, 26813 [Source:MGI Symbol;Acc:MGI:5477307]	22.0504	1.60871	0.576713	2.78944	0.00527991	0.0234781	19.4674	31.1018	49.037	14.2119	11.6499	6.83447	33.2021	10.8987
13631	ENSMUSG00000097994	Gm26982		predicted gene, 26982 [Source:MGI Symbol;Acc:MGI:5504097]	46.405	2.65724	0.457747	5.80505	6.43482e-09	2.13403e-07	102.528	52.6338	85.1695	14.2119	15.5332	8.35324	80.1106	12.6994
13644	ENSMUSG00000098235	Gm7497		predicted gene 7497 [Source:MGI Symbol;Acc:MGI:3646548]	94.9692	4.51301	0.60736	7.43053	1.08161e-13	8.1784e-12	316.67	70.5772	158.725	4.73729	5.43662	13.6689	181.991	7.94762
13653	ENSMUSG00000098674	Gm27813		predicted gene, 27813 [Source:MGI Symbol;Acc:MGI:5531195]	6.75876	2.94191	1.07073	2.74757	0.0060038	0.0260502	23.3609	4.78489	7.74268	2.36865	0.77666	1.51877	11.9628	1.55469
13659	ENSMUSG00000098766	Mir6386		microRNA 6386 [Source:MGI Symbol;Acc:MGI:5531224]	8.92476	4.45163	1.15431	3.85653	0.000115008	0.00104688	24.6587	7.17734	19.3567	1.5791	0.77666	0	17.0643	0.785253
13666	ENSMUSG00000098923	Tmem185b	226351	transmembrane protein 185B [Source:MGI Symbol;Acc:MGI:1917634]	171.6	1.81103	0.388258	4.6645	3.09365e-06	4.80153e-05	302.394	136.369	362.616	71.0594	66.7927	90.3668	267.126	76.073
13668	ENSMUSG00000098980	Mir6397		microRNA 6397 [Source:MGI Symbol;Acc:MGI:5531386]	46.6924	2.3586	0.42955	5.49086	3.99978e-08	1.06994e-06	66.1892	58.6149	109.688	13.4223	15.5332	16.7065	78.1641	15.2207
13703	ENSMUSG00000100009	Gm7967		predicted gene 7967 [Source:MGI Symbol;Acc:MGI:3644984]	16.2366	2.50728	0.828362	3.02679	0.00247163	0.0129225	14.2761	46.6527	21.9376	2.36865	1.55332	10.6314	27.6221	4.85112
13713	ENSMUSG00000100176	Gm28586		predicted gene 28586 [Source:MGI Symbol;Acc:MGI:5579292]	6.40913	3.16844	1.18828	2.6664	0.00766682	0.0317053	14.2761	3.58867	16.7758	0	0.77666	3.03754	11.5469	1.2714
13762	ENSMUSG00000101609	Kcnq1ot1		KCNQ1 overlapping transcript 1 [Source:MGI Symbol;Acc:MGI:1926855]	363.397	1.27159	0.474317	2.68088	0.0073429	0.0306714	414.007	196.181	931.703	184.754	222.125	231.612	513.964	212.831
13763	ENSMUSG00000101625	Gm29371		predicted gene 29371 [Source:MGI Symbol;Acc:MGI:5580077]	10.4162	2.3908	0.887221	2.69471	0.00704503	0.0297117	16.8718	22.7282	12.9045	0	5.43662	4.55631	17.5015	3.33098
13772	ENSMUSG00000101970	1810026B05Rik		RIKEN cDNA 1810026B05 gene [Source:MGI Symbol;Acc:MGI:1916420]	259.8	2.20552	0.302821	7.28324	3.25899e-13	2.32963e-11	494.472	498.825	287.77	80.534	91.6458	105.555	427.022	92.5781
13775	ENSMUSG00000102070	Gm28661		predicted gene 28661 [Source:MGI Symbol;Acc:MGI:5579367]	962.966	2.02485	0.547032	3.70152	0.000214309	0.00172716	1066.81	2746.53	824.596	707.436	253.968	178.456	1545.98	379.953
13803	ENSMUSG00000102595	Gm30097		predicted gene, 30097 [Source:MGI Symbol;Acc:MGI:5589256]	7.65958	4.83056	1.3929	3.468	0.000524346	0.00368015	27.2544	11.9622	5.16179	1.5791	0	0	14.7928	0.526366
13808	ENSMUSG00000102719	Gm37760		predicted gene, 37760 [Source:MGI Symbol;Acc:MGI:5610988]	13.8484	2.73668	0.679481	4.02761	5.63471e-05	0.000578884	24.6587	17.9433	29.6803	2.36865	3.8833	4.55631	24.0941	3.60275
13814	ENSMUSG00000102856	Gm37084		predicted gene, 37084 [Source:MGI Symbol;Acc:MGI:5610312]	64.0684	2.15144	0.401835	5.35403	8.60159e-08	2.10863e-06	128.485	88.5205	96.7835	31.582	13.9799	25.0597	104.596	23.5405
13825	ENSMUSG00000102997	Gm17244		predicted gene, 17244 [Source:MGI Symbol;Acc:MGI:4936878]	2.80335	5.29379	2.1172	2.50037	0.0124063	0.0462565	7.78697	0	9.03313	0	0	0	5.6067	0
13827	ENSMUSG00000103034	Gm8797		predicted pseudogene 8797 [Source:MGI Symbol;Acc:MGI:3643769]	71.1993	2.75139	0.440559	6.24521	4.23228e-10	1.80009e-08	138.868	71.7734	161.306	24.476	17.8632	12.9095	123.982	18.4162
13829	ENSMUSG00000103041	Gm37305		predicted gene, 37305 [Source:MGI Symbol;Acc:MGI:5610533]	109.75	1.9771	0.334255	5.91494	3.32006e-09	1.17921e-07	163.526	126.8	234.861	42.6357	48.1529	42.5256	175.062	44.438
13833	ENSMUSG00000103094	Gm37558		predicted gene, 37558 [Source:MGI Symbol;Acc:MGI:5610786]	6.3879	2.85953	0.970843	2.94541	0.00322528	0.0159604	10.3826	15.5509	7.74268	1.5791	1.55332	1.51877	11.2254	1.5504
13837	ENSMUSG00000103220	Gm37728		predicted gene, 37728 [Source:MGI Symbol;Acc:MGI:5610956]	30.591	3.1491	0.546758	5.75958	8.43232e-09	2.72218e-07	75.274	57.4187	32.2612	5.52684	6.98994	6.07508	54.9846	6.19729
13852	ENSMUSG00000103553	Gm38218		predicted gene, 38218 [Source:MGI Symbol;Acc:MGI:5611446]	9.06439	2.42045	0.96204	2.51596	0.0118709	0.0446716	5.19131	8.37356	32.2612	3.1582	3.8833	1.51877	15.2754	2.85342
13853	ENSMUSG00000103560	Gm38070		predicted gene, 38070 [Source:MGI Symbol;Acc:MGI:5611298]	132.49	2.56251	0.414981	6.17501	6.61596e-10	2.67357e-08	302.394	254.796	122.592	48.952	40.3863	25.8191	226.594	38.3858
13855	ENSMUSG00000103621	Gm38366		predicted gene, 38366 [Source:MGI Symbol;Acc:MGI:5611594]	27.8979	2.27337	0.538104	4.22478	2.39175e-05	0.00028082	44.1261	27.5131	67.1033	10.2641	6.98994	11.3908	46.2475	9.54828
13856	ENSMUSG00000103625	Gm37357		predicted gene, 37357 [Source:MGI Symbol;Acc:MGI:5610585]	5.26556	5.20627	1.60772	3.23829	0.0012025	0.00723672	9.0848	2.39245	19.3567	0	0	0.759385	10.278	0.253128
13872	ENSMUSG00000103867	9630010A21Rik		RIKEN cDNA 9630010A21 gene [Source:MGI Symbol;Acc:MGI:2442787]	7.18019	2.57626	0.938427	2.74529	0.00604567	0.0261651	11.6805	7.17734	18.0663	0.789549	2.32998	3.03754	12.308	2.05236
13885	ENSMUSG00000104030	5330406M23Rik		RIKEN cDNA 5330406M23 gene [Source:MGI Symbol;Acc:MGI:1923921]	27.4549	1.82206	0.584434	3.11764	0.00182305	0.0101765	49.3175	61.0074	18.0663	7.89549	15.5332	12.9095	42.797	12.1127
13886	ENSMUSG00000104053	Gm38126		predicted gene, 38126 [Source:MGI Symbol;Acc:MGI:5611354]	6.98708	4.71068	1.33189	3.53684	0.000404949	0.00294545	9.0848	11.9622	19.3567	0	0	1.51877	13.4679	0.506257
13889	ENSMUSG00000104126	Gm37486		predicted gene, 37486 [Source:MGI Symbol;Acc:MGI:5610714]	5.90507	6.37118	1.49542	4.26045	2.04015e-05	0.000245467	9.0848	9.56979	16.7758	0	0	0	11.8101	0
13898	ENSMUSG00000104253	Gm37174		predicted gene, 37174 [Source:MGI Symbol;Acc:MGI:5610402]	134.197	2.88779	0.618141	4.67173	2.98678e-06	4.66185e-05	166.122	460.546	82.5886	56.058	17.0865	22.7816	236.419	31.9754
13921	ENSMUSG00000104467	Gm37660		predicted gene, 37660 [Source:MGI Symbol;Acc:MGI:5610888]	18.0778	2.50097	0.747062	3.34774	0.000814749	0.0052805	42.8283	11.9622	37.423	7.10594	1.55332	7.59385	30.7378	5.4177
13929	ENSMUSG00000104576	F830115B05Rik		RIKEN cDNA F830115B05 gene [Source:MGI Symbol;Acc:MGI:3642056]	28.0309	4.37272	0.652077	6.70584	2.00254e-11	1.09548e-09	60.9979	64.5961	34.8421	3.1582	1.55332	3.03754	53.4787	2.58302
13932	ENSMUSG00000104651	Gm21168		predicted gene, 21168 [Source:MGI Symbol;Acc:MGI:5434523]	4.54434	4.03689	1.52267	2.6512	0.0080207	0.0329127	11.6805	2.39245	11.614	1.5791	0	0	8.56231	0.526366
13935	ENSMUSG00000104682	Gm42636		predicted gene 42636 [Source:MGI Symbol;Acc:MGI:5662773]	24.9192	4.96534	1.01028	4.9148	8.88745e-07	1.63816e-05	7.78697	28.7094	108.398	0.789549	1.55332	2.27816	48.298	1.54034
13940	ENSMUSG00000104728	Gm42462		predicted gene 42462 [Source:MGI Symbol;Acc:MGI:5662599]	8.77146	2.52563	0.919682	2.7462	0.00602899	0.0261201	27.2544	5.98112	11.614	3.94775	1.55332	2.27816	14.9498	2.59307
13959	ENSMUSG00000105083	Gm42699		predicted gene 42699 [Source:MGI Symbol;Acc:MGI:5662836]	7.50156	3.76139	1.08716	3.45982	0.000540538	0.00377047	19.4674	9.56979	12.9045	0.789549	0	2.27816	13.9806	1.02257
13964	ENSMUSG00000105161	Gm42595		predicted gene 42595 [Source:MGI Symbol;Acc:MGI:5662732]	28.2918	1.71314	0.615468	2.78348	0.00537797	0.0238021	29.85	21.532	78.7173	14.2119	17.0865	8.35324	43.3664	13.2172
13976	ENSMUSG00000105374	Gm42551		predicted gene 42551 [Source:MGI Symbol;Acc:MGI:5662688]	21.6966	4.7542	1.0338	4.59876	4.25011e-06	6.33163e-05	23.3609	95.6979	6.45224	1.5791	2.32998	0.759385	41.837	1.55615
13981	ENSMUSG00000105434	Gm43359		predicted gene 43359 [Source:MGI Symbol;Acc:MGI:5663496]	72.3067	4.30034	0.528908	8.13059	4.27194e-16	4.59991e-14	205.057	64.5961	143.24	7.10594	7.7666	6.07508	137.631	6.98254
13982	ENSMUSG00000105442	Gm42614		predicted gene 42614 [Source:MGI Symbol;Acc:MGI:5662751]	9.93871	2.42981	0.912466	2.6629	0.00774693	0.0319822	12.9783	17.9433	19.3567	6.31639	0	3.03754	16.7594	3.11798
13990	ENSMUSG00000105519	E430021H15Rik		RIKEN cDNA E430021H15 gene [Source:MGI Symbol;Acc:MGI:2444377]	9.20532	2.44042	0.880198	2.77258	0.0055613	0.0244925	14.2761	15.5509	16.7758	6.31639	1.55332	0.759385	15.5343	2.87637
13995	ENSMUSG00000105572	Gm43300		predicted gene 43300 [Source:MGI Symbol;Acc:MGI:5663437]	48.37	1.47288	0.394449	3.73401	0.000188458	0.00154741	85.6566	49.0452	78.7173	25.2656	29.5131	22.0222	71.1397	25.6003
13999	ENSMUSG00000105622	Gm42615		predicted gene 42615 [Source:MGI Symbol;Acc:MGI:5662752]	7.79063	2.92108	0.978535	2.98516	0.00283429	0.0144198	15.5739	17.9433	7.74268	3.94775	0.77666	0.759385	13.7533	1.82793
14011	ENSMUSG00000105814	Mir703		microRNA 703 [Source:MGI Symbol;Acc:MGI:3629657]	24.7727	1.31907	0.515773	2.55746	0.0105439	0.040797	36.3392	31.1018	38.7134	14.2119	7.7666	20.5034	35.3848	14.1606
14012	ENSMUSG00000105818	Gm43256		predicted gene 43256 [Source:MGI Symbol;Acc:MGI:5663393]	12.9342	2.75118	0.78132	3.52119	0.000429609	0.00309438	29.85	11.9622	25.8089	1.5791	2.32998	6.07508	22.5404	3.32805
14019	ENSMUSG00000105933	Gm43260		predicted gene 43260 [Source:MGI Symbol;Acc:MGI:5663397]	9.26362	2.46724	0.822037	3.00137	0.00268766	0.0138101	19.4674	9.56979	18.0663	2.36865	1.55332	4.55631	15.7012	2.82609
14022	ENSMUSG00000105970	Gm43360		predicted gene 43360 [Source:MGI Symbol;Acc:MGI:5663497]	52.7711	4.80993	0.742516	6.47789	9.30142e-11	4.45761e-09	194.674	81.3432	29.6803	5.52684	3.8833	1.51877	101.899	3.64297
14030	ENSMUSG00000106063	C030032O16Rik		RIKEN cDNA C030032O16 gene [Source:MGI Symbol;Acc:MGI:1924718]	8.61784	5.93126	1.41304	4.19751	2.69863e-05	0.000311267	25.9566	10.766	14.1949	0.789549	0	0	16.9725	0.263183
14032	ENSMUSG00000106087	Gm43609		predicted gene 43609 [Source:MGI Symbol;Acc:MGI:5663746]	89.9946	1.35509	0.387048	3.50109	0.00046336	0.00330253	83.061	139.958	165.177	56.8475	34.173	60.7508	129.399	50.5905
14041	ENSMUSG00000106188	Gm9710		predicted gene 9710 [Source:MGI Symbol;Acc:MGI:3780118]	7.00579	5.63161	1.42815	3.94329	8.03705e-05	0.000774937	12.9783	17.9433	10.3236	0.789549	0	0	13.7484	0.263183
14043	ENSMUSG00000106205	C230096K16Rik		RIKEN cDNA C230096K16 gene [Source:MGI Symbol;Acc:MGI:3041194]	21.6506	2.37403	0.666699	3.56088	0.000369621	0.00273074	62.2957	31.1018	15.4854	9.47459	6.98994	4.55631	36.2943	7.00695
14044	ENSMUSG00000106229	Gm19409		predicted gene, 19409 [Source:MGI Symbol;Acc:MGI:5011594]	19.7053	3.19374	0.682099	4.68223	2.83769e-06	4.47015e-05	28.5522	41.8678	36.1325	7.10594	0.77666	3.79693	35.5175	3.89318
14049	ENSMUSG00000106288	Gm43593		predicted gene 43593 [Source:MGI Symbol;Acc:MGI:5663730]	40.613	1.60196	0.443854	3.60922	0.000307119	0.00233782	76.5718	70.5772	36.1325	20.5283	17.0865	22.7816	61.0938	20.1321
14055	ENSMUSG00000106375	Gm43361		predicted gene 43361 [Source:MGI Symbol;Acc:MGI:5663498]	90.2532	4.20182	0.541783	7.75552	8.79788e-15	7.83656e-13	279.033	167.471	67.1033	8.68504	10.8732	8.35324	171.203	9.30384
14059	ENSMUSG00000106443	Gm42702		predicted gene 42702 [Source:MGI Symbol;Acc:MGI:5662839]	12.5916	3.13865	0.937216	3.34891	0.000811301	0.00526016	44.1261	9.56979	14.1949	0.789549	1.55332	5.3157	22.6303	2.55285
14060	ENSMUSG00000106457	Gm42585		predicted gene 42585 [Source:MGI Symbol;Acc:MGI:5662722]	10.0926	2.46938	0.759935	3.24945	0.00115626	0.00702806	15.5739	21.532	14.1949	2.36865	2.32998	4.55631	17.1003	3.08498
14066	ENSMUSG00000106541	Gm43246		predicted gene 43246 [Source:MGI Symbol;Acc:MGI:5663383]	9.32503	3.46373	0.893097	3.87833	0.000105174	0.000970354	12.9783	21.532	16.7758	2.36865	0.77666	1.51877	17.0954	1.55469
14070	ENSMUSG00000106619	Gm9353		predicted gene 9353 [Source:MGI Symbol;Acc:MGI:3644601]	11.3796	2.96467	0.836567	3.54385	0.000394327	0.00287558	32.4457	20.3358	7.74268	2.36865	3.10664	2.27816	20.1747	2.58448
14071	ENSMUSG00000106636	Gm43813		predicted gene 43813 [Source:MGI Symbol;Acc:MGI:5663950]	6.34888	3.14627	1.02496	3.06965	0.00214307	0.0115712	11.6805	8.37356	14.1949	0.789549	0.77666	2.27816	11.4163	1.28145
14080	ENSMUSG00000106775	C130093G08Rik		RIKEN cDNA C130093G08 gene [Source:MGI Symbol;Acc:MGI:2443208]	34.3953	5.71555	1.08556	5.26507	1.40135e-07	3.27366e-06	160.931	28.7094	12.9045	0.789549	0	3.03754	67.5148	1.2757
14085	ENSMUSG00000106847	Peg13		paternally expressed 13 [Source:MGI Symbol;Acc:MGI:2663476]	83.2388	1.13774	0.341078	3.3357	0.000850834	0.00546442	119.4	104.071	120.012	34.7402	55.1428	66.0665	114.494	51.9832
14105	ENSMUSG00000107019	Gm43682		predicted gene 43682 [Source:MGI Symbol;Acc:MGI:5663819]	5.91405	3.83001	1.29016	2.96864	0.00299124	0.0150307	12.9783	5.98112	14.1949	0	2.32998	0	11.0514	0.77666
14112	ENSMUSG00000107176	Gm9794		predicted pseudogene 9794 [Source:MGI Symbol;Acc:MGI:3642653]	22.157	1.44668	0.487886	2.96519	0.00302493	0.0151764	29.85	28.7094	38.7134	13.4223	10.0966	12.1502	32.4243	11.8897
14116	ENSMUSG00000107205	Gm42576		predicted gene 42576 [Source:MGI Symbol;Acc:MGI:5662713]	19.3115	1.44739	0.56582	2.55803	0.0105266	0.0407482	36.3392	23.9245	24.5185	15.0014	6.21328	9.87201	28.2607	10.3622
14130	ENSMUSG00000107362	Gm40309		predicted gene, 40309 [Source:MGI Symbol;Acc:MGI:5623194]	11.0269	3.48864	0.931163	3.74654	0.000179292	0.00149168	9.0848	15.5509	36.1325	1.5791	0.77666	3.03754	20.2561	1.79777
14170	ENSMUSG00000107951	Gm6210		predicted gene 6210 [Source:MGI Symbol;Acc:MGI:3643375]	16.6511	3.15577	0.781758	4.03676	5.41947e-05	0.000560495	49.3175	9.56979	30.9707	2.36865	3.8833	3.79693	29.9527	3.34962
14186	ENSMUSG00000108108	Gm44270		predicted gene, 44270 [Source:MGI Symbol;Acc:MGI:5690662]	7.54899	3.75928	1.17984	3.18625	0.00144128	0.00839167	27.2544	7.17734	7.74268	0.789549	2.32998	0	14.0581	1.03984
14188	ENSMUSG00000108122	Gm44116		predicted gene, 44116 [Source:MGI Symbol;Acc:MGI:5690508]	11.3196	2.80301	0.815319	3.43793	0.000586178	0.00401475	32.4457	17.9433	9.03313	2.36865	2.32998	3.79693	19.8074	2.83185
14192	ENSMUSG00000108211	Gm44130		predicted gene, 44130 [Source:MGI Symbol;Acc:MGI:5690522]	5.28411	3.65927	1.26529	2.89205	0.00382741	0.0182154	15.5739	4.78489	9.03313	0	1.55332	0.759385	9.79732	0.770902
14200	ENSMUSG00000108368	Gm45053		predicted gene 45053 [Source:MGI Symbol;Acc:MGI:5753629]	79.7045	1.59868	0.522444	3.06	0.0022134	0.0118678	114.209	46.6527	198.729	31.582	55.9195	31.1348	119.863	39.5454
14202	ENSMUSG00000108414	Snhg1		small nucleolar RNA host gene 1 [Source:MGI Symbol;Acc:MGI:3763743]	220.635	1.87386	0.476941	3.92891	8.53324e-05	0.000816973	371.179	124.407	544.569	86.0609	75.336	122.261	346.718	94.5526
14213	ENSMUSG00000108521	Gm44639		predicted gene 44639 [Source:MGI Symbol;Acc:MGI:5753215]	4.96994	6.12558	1.70403	3.59476	0.000324687	0.00244528	12.9783	15.5509	1.29045	0	0	0	9.93988	0
14216	ENSMUSG00000108563	Gm44686		predicted gene 44686 [Source:MGI Symbol;Acc:MGI:5753262]	21.0258	1.87171	0.710086	2.63589	0.00839167	0.0340166	24.6587	55.0263	19.3567	12.6328	2.32998	12.1502	33.0139	9.03764
14219	ENSMUSG00000108614	2610306O10Rik		RIKEN cDNA 2610306O10 gene [Source:MGI Symbol;Acc:MGI:1917710]	5.64986	3.30419	1.16383	2.83906	0.00452462	0.0207207	16.8718	3.58867	10.3236	1.5791	0.77666	0.759385	10.2613	1.03838
14222	ENSMUSG00000108633	Gm44694		predicted gene 44694 [Source:MGI Symbol;Acc:MGI:5753270]	29.7271	2.69035	0.611384	4.40043	1.08038e-05	0.000142154	31.1479	89.7167	33.5516	4.73729	10.0966	9.11262	51.4721	7.98216
14226	ENSMUSG00000108709	4933431G14Rik	71265	RIKEN cDNA 4933431G14 gene [Source:MGI Symbol;Acc:MGI:1918515]	121.113	1.79975	0.274919	6.54646	5.89183e-11	2.93093e-09	168.718	202.162	193.567	63.1639	49.7062	49.36	188.149	54.0767
14229	ENSMUSG00000108777	Gm45081		predicted gene 45081 [Source:MGI Symbol;Acc:MGI:5753657]	5.98359	6.38835	1.60124	3.98962	6.61795e-05	0.000660359	9.0848	3.58867	23.2281	0	0	0	11.9672	0
14243	ENSMUSG00000108984	Gm44916		predicted gene 44916 [Source:MGI Symbol;Acc:MGI:5753492]	4.08843	3.89876	1.51218	2.57824	0.00993059	0.0389643	11.6805	3.58867	7.74268	0	0	1.51877	7.6706	0.506257
14244	ENSMUSG00000109005	Gm45221		predicted gene 45221 [Source:MGI Symbol;Acc:MGI:5753797]	211.814	3.19259	0.359258	8.88662	6.29952e-19	9.74307e-17	516.536	302.644	326.483	41.8461	27.1831	56.1945	381.888	41.7412
14250	ENSMUSG00000109157	Gm44829		predicted gene 44829 [Source:MGI Symbol;Acc:MGI:5753405]	22.7398	3.52838	0.761379	4.6342	3.58321e-06	5.45757e-05	40.2327	14.3547	70.9746	5.52684	1.55332	3.79693	41.854	3.6257
14265	ENSMUSG00000109279	Gm45220		predicted gene 45220 [Source:MGI Symbol;Acc:MGI:5753796]	65.2179	3.18798	0.487362	6.54129	6.09913e-11	3.0252e-09	189.483	90.913	72.265	11.8432	10.0966	16.7065	117.554	12.8821
14270	ENSMUSG00000109314	Gm44699		predicted gene 44699 [Source:MGI Symbol;Acc:MGI:5753275]	8.79905	2.90905	1.081	2.69107	0.00712229	0.0299411	28.5522	16.7471	1.29045	1.5791	3.10664	1.51877	15.5299	2.06817
14272	ENSMUSG00000109325	Krt8-ps		keratin 8, pseudogene [Source:MGI Symbol;Acc:MGI:3779503]	11.9413	4.45925	1.27007	3.51103	0.00044638	0.00319759	40.2327	1.19622	27.0994	0.789549	2.32998	0	22.8428	1.03984
14273	ENSMUSG00000109336	Samd4b	233033	sterile alpha motif domain containing 4B [Source:MGI Symbol;Acc:MGI:2448542]	471.905	1.14788	0.323917	3.54374	0.000394499	0.00287558	840.992	372.025	738.136	296.87	281.927	301.476	650.385	293.425
14281	ENSMUSG00000109429	Gm45223		predicted gene 45223 [Source:MGI Symbol;Acc:MGI:5753799]	38.3865	3.20668	0.470251	6.81909	9.16187e-12	5.30173e-10	73.9762	53.83	80.0077	9.47459	5.43662	7.59385	69.2713	7.50169
14284	ENSMUSG00000109498	Gm45222		predicted gene 45222 [Source:MGI Symbol;Acc:MGI:5753798]	30.3262	2.00312	0.585356	3.42206	0.000621492	0.00421085	48.0196	71.7734	25.8089	14.2119	5.43662	16.7065	48.534	12.1183
14287	ENSMUSG00000109536	9330162G02Rik		RIKEN cDNA 9330162G02 gene [Source:MGI Symbol;Acc:MGI:2442217]	45.0906	1.79783	0.376395	4.77644	1.78423e-06	3.03248e-05	60.9979	72.9696	76.1364	22.1074	16.3099	22.0222	70.0346	20.1465
14296	ENSMUSG00000109641	Gm45556		predicted gene 45556 [Source:MGI Symbol;Acc:MGI:5791392]	5.59838	6.29189	1.72193	3.65398	0.000258202	0.00202061	23.3609	1.19622	9.03313	0	0	0	11.1968	0
14297	ENSMUSG00000109642	Gm45289		predicted gene 45289 [Source:MGI Symbol;Acc:MGI:5791125]	16.3785	3.12123	0.730946	4.27012	1.95369e-05	0.000236402	38.9348	14.3547	34.8421	4.73729	3.8833	1.51877	29.3772	3.37979
14305	ENSMUSG00000109709	Gm45290		predicted gene 45290 [Source:MGI Symbol;Acc:MGI:5791126]	9.10845	2.95829	0.885038	3.34256	0.000830108	0.00535013	23.3609	9.56979	15.4854	2.36865	3.10664	0.759385	16.1387	2.07822
14317	ENSMUSG00000109864	Eid3	66341	EP300 interacting inhibitor of differentiation 3 [Source:MGI Symbol;Acc:MGI:1913591]	71.9958	3.43301	0.536999	6.39296	1.627e-10	7.46097e-09	163.526	55.0263	176.791	17.3701	12.4266	6.83447	131.781	12.2104
14318	ENSMUSG00000109865	Hspa14	50497	heat shock protein 14 [Source:MGI Symbol;Acc:MGI:1354164]	219.12	1.08491	0.283142	3.83168	0.000127271	0.00113998	228.418	388.773	276.156	128.697	150.672	142.005	297.782	140.458
14323	ENSMUSG00000109953	5430430B14Rik		RIKEN cDNA 5430430B14 gene [Source:MGI Symbol;Acc:MGI:1918674]	2.80458	5.29436	2.11711	2.50074	0.0123933	0.046218	9.0848	0	7.74268	0	0	0	5.60916	0
14326	ENSMUSG00000110079	Gm45292		predicted gene 45292 [Source:MGI Symbol;Acc:MGI:5791128]	9.65015	4.58257	1.46653	3.12477	0.00177945	0.00998805	18.1696	0	37.423	0.789549	0	1.51877	18.5309	0.76944
14355	ENSMUSG00000110498	A630001O12Rik		RIKEN cDNA A630001O12 gene [Source:MGI Symbol;Acc:MGI:3041181]	8.44693	2.00855	0.798968	2.51393	0.0119395	0.0448503	11.6805	9.56979	19.3567	3.94775	2.32998	3.79693	13.5356	3.35822
14361	ENSMUSG00000110588	Gm45774		predicted gene 45774 [Source:MGI Symbol;Acc:MGI:5804889]	121.54	3.29123	0.371739	8.8536	8.47378e-19	1.28718e-16	273.842	238.048	149.692	27.6342	24.0765	15.9471	220.527	22.5526
14375	ENSMUSG00000110697	Gm31718		predicted gene, 31718 [Source:MGI Symbol;Acc:MGI:5590877]	58.5761	2.82566	0.386978	7.30186	2.83825e-13	2.07241e-11	84.3588	93.3054	130.335	15.791	14.7565	12.9095	102.666	14.4857
14378	ENSMUSG00000110729	Gm47117		predicted gene, 47117 [Source:MGI Symbol;Acc:MGI:6095861]	64.1177	9.81272	2.49867	3.92718	8.59461e-05	0.000820539	76.5718	3.58867	304.546	0	0	0	128.235	0
14403	ENSMUSG00000111197	Gm10608		predicted gene 10608 [Source:MGI Symbol;Acc:MGI:3642009]	81.0994	7.28936	1.00036	7.28675	3.17518e-13	2.28895e-11	90.848	44.2603	348.421	0.789549	0	2.27816	161.176	1.02257
14405	ENSMUSG00000111250	Gm47818		predicted gene, 47818 [Source:MGI Symbol;Acc:MGI:6097006]	5.38518	5.24265	1.48759	3.52426	0.000424664	0.00306395	7.78697	9.56979	14.1949	0	0	0.759385	10.5172	0.253128
14406	ENSMUSG00000111253	Gm34654		predicted gene, 34654 [Source:MGI Symbol;Acc:MGI:5593813]	7.61278	2.65629	1.00035	2.65537	0.00792206	0.0325787	10.3826	8.37356	20.6472	4.73729	0.77666	0.759385	13.1344	2.09111
14408	ENSMUSG00000111282	Gm47528		predicted gene, 47528 [Source:MGI Symbol;Acc:MGI:6096530]	365.383	6.99391	0.395363	17.6899	5.02032e-70	1.70821e-66	711.21	663.904	800.077	5.52684	8.54326	3.03754	725.064	5.70255
14425	ENSMUSG00000111539	Gm48372		predicted gene, 48372 [Source:MGI Symbol;Acc:MGI:6097846]	23.9721	3.40629	0.791123	4.30564	1.66507e-05	0.000205572	90.848	25.1207	15.4854	2.36865	6.21328	3.79693	43.818	4.12628
14426	ENSMUSG00000111594	Gm3365		predicted gene 3365 [Source:MGI Symbol;Acc:MGI:3781543]	9.46479	2.07479	0.776108	2.67333	0.00751033	0.0312481	19.4674	8.37356	18.0663	4.73729	3.10664	3.03754	15.3024	3.62716
14427	ENSMUSG00000111605	4632418H02Rik		RIKEN cDNA 4632418H02 gene [Source:MGI Symbol;Acc:MGI:1925515]	9.98376	2.29853	0.786338	2.92308	0.00346588	0.0168809	22.0631	8.37356	19.3567	3.94775	3.8833	2.27816	16.5978	3.36973
14432	ENSMUSG00000111709	Gm3776	100042295	predicted gene 3776 [Source:MGI Symbol;Acc:MGI:3826440]	19.0528	3.03735	0.65301	4.6513	3.2985e-06	5.06474e-05	51.9131	20.3358	29.6803	3.94775	3.8833	4.55631	33.9764	4.12912
14440	ENSMUSG00000111873	Gm39463		predicted gene, 39463 [Source:MGI Symbol;Acc:MGI:5622348]	12.9149	7.49893	1.54789	4.84462	1.26852e-06	2.25041e-05	44.1261	2.39245	30.9707	0	0	0	25.8298	0
14450	ENSMUSG00000112023	Lilr4b	14727	leukocyte immunoglobulin-like receptor, subfamily B, member 4B [Source:MGI Symbol;Acc:MGI:102702]	120.214	1.91574	0.501169	3.82253	0.000132087	0.00117164	363.392	110.053	96.7835	48.952	49.7062	52.3976	190.076	50.3519
14462	ENSMUSG00000112239	Gm17823		predicted gene, 17823 [Source:MGI Symbol;Acc:MGI:5010008]	51.0605	2.95008	0.531136	5.55428	2.78752e-08	7.85166e-07	123.294	71.7734	76.1364	18.1596	13.2032	3.79693	90.4011	11.7199
14494	ENSMUSG00000112734	Gm47644		predicted gene, 47644 [Source:MGI Symbol;Acc:MGI:6096722]	100.68	3.78038	0.422495	8.94776	3.62783e-19	5.82266e-17	219.333	222.498	121.302	7.89549	17.8632	15.1877	187.711	13.6488
14496	ENSMUSG00000112771	Gm47718		predicted gene, 47718 [Source:MGI Symbol;Acc:MGI:6096845]	13.1785	2.64655	0.759392	3.48509	0.000491966	0.00348307	14.2761	20.3358	33.5516	6.31639	1.55332	3.03754	22.7212	3.63575
14497	ENSMUSG00000112774	Gm36041		predicted gene, 36041 [Source:MGI Symbol;Acc:MGI:5595200]	32.7192	2.01544	0.498181	4.04561	5.2188e-05	0.000542379	45.424	53.83	58.0701	21.3178	9.31992	8.35324	52.4414	12.997
14500	ENSMUSG00000112794	Gm48878		predicted gene, 48878 [Source:MGI Symbol;Acc:MGI:6098630]	67.3247	3.99124	0.498231	8.01081	1.13958e-15	1.16793e-13	128.485	163.883	87.7504	3.94775	6.21328	13.6689	126.706	7.94332
14502	ENSMUSG00000112806	Gm48146		predicted gene, 48146 [Source:MGI Symbol;Acc:MGI:6097513]	6.67822	2.92468	1.07106	2.73064	0.00632119	0.0271269	3.89348	9.56979	21.9376	1.5791	2.32998	0.759385	11.8003	1.55615
14503	ENSMUSG00000112822	A130012E19Rik		RIKEN cDNA A130012E19 gene [Source:MGI Symbol;Acc:MGI:2443640]	6.63999	2.66937	0.983579	2.71394	0.00664881	0.0282861	15.5739	5.98112	12.9045	0.789549	1.55332	3.03754	11.4865	1.79347
14507	ENSMUSG00000112907	Gm47015		predicted gene, 47015 [Source:MGI Symbol;Acc:MGI:6095697]	47.1293	2.68291	0.860591	3.11752	0.00182382	0.0101766	10.3826	204.554	29.6803	15.791	15.5332	6.83447	81.539	12.7195
14510	ENSMUSG00000112925	Gm31763		predicted gene, 31763 [Source:MGI Symbol;Acc:MGI:5590922]	19.9311	1.81179	0.613602	2.95271	0.00315002	0.0156918	28.5522	33.4943	30.9707	14.2119	9.31992	3.03754	31.0057	8.85645
14512	ENSMUSG00000113015	Gm6296		predicted gene 6296 [Source:MGI Symbol;Acc:MGI:3648150]	6.74351	2.69479	0.95645	2.81749	0.00484012	0.021877	7.78697	14.3547	12.9045	0.789549	3.10664	1.51877	11.682	1.80499
14524	ENSMUSG00000113326	Gm47586		predicted gene, 47586 [Source:MGI Symbol;Acc:MGI:6096627]	17.8715	4.22717	0.891205	4.74321	2.10361e-06	3.48819e-05	60.9979	22.7282	18.0663	3.1582	0	2.27816	33.9308	1.81212
14532	ENSMUSG00000113491	Gm19221		predicted gene, 19221 [Source:MGI Symbol;Acc:MGI:5011406]	30.0154	1.32781	0.501154	2.6495	0.00806107	0.0330385	53.2109	22.7282	52.9083	18.1596	19.4165	13.6689	42.9492	17.0817
14545	ENSMUSG00000113665	Gm47603		predicted gene, 47603 [Source:MGI Symbol;Acc:MGI:6096658]	11.1526	3.50337	0.832061	4.21047	2.54835e-05	0.000296252	24.6587	23.9245	12.9045	1.5791	2.32998	1.51877	20.4959	1.80928
14550	ENSMUSG00000113776	Gm19327		predicted gene, 19327 [Source:MGI Symbol;Acc:MGI:5011512]	6.46294	3.52512	1.13242	3.11292	0.00185245	0.0102892	22.0631	7.17734	6.45224	0.789549	0.77666	1.51877	11.8976	1.02833
14577	ENSMUSG00000114285	Gm47773		predicted gene, 47773 [Source:MGI Symbol;Acc:MGI:6096932]	7.75346	5.77766	1.44955	3.98582	6.72481e-05	0.000668669	10.3826	9.56979	25.8089	0	0	0.759385	15.2538	0.253128
14579	ENSMUSG00000114362	4933433G19Rik	71226	RIKEN cDNA 4933433G19 gene [Source:MGI Symbol;Acc:MGI:1918476]	11.305	1.94709	0.777315	2.5049	0.0122488	0.0457694	7.78697	21.532	24.5185	7.10594	2.32998	4.55631	17.9458	4.66408
14616	ENSMUSG00000114934	Gm48342		predicted gene, 48342 [Source:MGI Symbol;Acc:MGI:6097804]	5.94781	3.39583	1.12983	3.0056	0.00265055	0.0136524	12.9783	13.1585	6.45224	1.5791	0	1.51877	10.863	1.03262
14638	ENSMUSG00000115276	9930017N22Rik		RIKEN cDNA 9930017N22 gene [Source:MGI Symbol;Acc:MGI:2443961]	41.8946	2.22587	0.471492	4.72091	2.34791e-06	3.80792e-05	62.2957	45.4565	99.3644	18.9492	10.8732	14.4283	69.0389	14.7502
14641	ENSMUSG00000115388	Eppk1	223650	epiplakin 1 [Source:MGI Symbol;Acc:MGI:2386306]	1180.55	2.28745	0.315026	7.26113	3.83877e-13	2.72121e-11	2275.09	1296.71	2307.32	341.875	530.459	331.851	1959.71	401.395
14642	ENSMUSG00000115426	Gm19510		predicted gene, 19510 [Source:MGI Symbol;Acc:MGI:5011695]	14.0178	4.38002	1.2661	3.45945	0.000541287	0.00377344	63.5936	1.19622	15.4854	0	1.55332	2.27816	26.7584	1.27716
14643	ENSMUSG00000115431	Gm3219		predicted pseudogene 3219 [Source:MGI Symbol;Acc:MGI:3781398]	47.0835	1.13176	0.407677	2.77611	0.00550131	0.0242408	53.2109	64.5961	76.1364	40.267	20.1932	28.0973	64.6478	29.5191
14648	ENSMUSG00000115764	Gm18811		predicted gene, 18811 [Source:MGI Symbol;Acc:MGI:5010996]	4.04339	3.87134	1.46202	2.64794	0.00809846	0.0331678	7.78697	7.17734	7.74268	0	1.55332	0	7.569	0.517773
14692	ENSMUSG00000116707				25.1408	1.99798	0.529335	3.77451	0.000160324	0.00135904	48.0196	27.5131	45.1657	10.2641	6.21328	13.6689	40.2328	10.0488
14708	ENSMUSG00000116946				66.5972	3.53731	0.441525	8.01157	1.1325e-15	1.16771e-13	132.378	122.015	113.559	10.2641	4.65996	16.7065	122.651	10.5435
14713	ENSMUSG00000117050				10.8764	7.25073	1.42147	5.10088	3.38077e-07	7.01427e-06	35.0414	9.56979	20.6472	0	0	0	21.7528	0
14715	ENSMUSG00000117098				67.9173	2.35211	0.406113	5.79176	6.96541e-09	2.2789e-07	158.335	75.3621	107.107	26.0551	17.8632	22.7816	113.601	22.2333
14725	ENSMUSG00000117257				3.6923	4.68291	1.61119	2.90649	0.00365509	0.0175612	3.89348	7.17734	10.3236	0	0	0.759385	7.13147	0.253128
14729	ENSMUSG00000117310				60.3872	1.92577	0.572034	3.36654	0.000761181	0.00498459	177.802	57.4187	51.6179	38.6879	15.5332	21.2628	95.613	25.1613
14734	ENSMUSG00000117390				62.2815	5.70954	0.724477	7.88091	3.24995e-15	3.12381e-13	175.207	59.8112	131.626	5.52684	0	1.51877	122.215	2.34854
14735	ENSMUSG00000117405				24.3753	1.50863	0.503964	2.99354	0.00275765	0.0140931	40.2327	38.2791	29.6803	11.8432	17.8632	8.35324	36.064	12.6865
14746	ENSMUSG00000117503				21.6994	6.36699	1.26915	5.01674	5.25561e-07	1.02502e-05	73.9762	10.766	43.8752	1.5791	0	0	42.8725	0.526366
14747	ENSMUSG00000117538				30.4866	2.72781	0.497659	5.48129	4.22243e-08	1.1242e-06	53.2109	66.9885	38.7134	6.31639	10.0966	7.59385	52.971	8.00227
14750	ENSMUSG00000117597				42.3947	5.5138	0.811078	6.79811	1.06003e-11	6.01143e-10	142.761	28.7094	77.4268	3.1582	1.55332	0.759385	82.9658	1.82363
14752	ENSMUSG00000117619				17.7283	4.21477	0.808562	5.21267	1.86146e-07	4.15605e-06	38.9348	15.5509	46.4561	1.5791	2.32998	1.51877	33.6473	1.80928
14758	ENSMUSG00000117679				644.782	1.64577	0.249952	6.58435	4.56887e-11	2.3203e-09	769.612	1222.54	939.446	345.823	294.354	296.92	977.199	312.365
14765	ENSMUSG00000117780				71.0301	2.16485	0.411024	5.26696	1.38699e-07	3.24579e-06	115.507	72.9696	160.015	33.1611	21.7465	22.7816	116.164	25.8964
14774	ENSMUSG00000117912				9.36126	5.14103	1.30208	3.94834	7.86966e-05	0.000762452	16.8718	28.7094	9.03313	0	1.55332	0	18.2048	0.517773
14778	ENSMUSG00000117975				72.2097	2.6211	0.473044	5.54093	3.00874e-08	8.39141e-07	208.95	83.7356	80.0077	24.476	17.8632	18.2252	124.231	20.1881
14787	ENSMUSG00000118106				27.8701	1.76836	0.49974	3.53856	0.000402322	0.00292885	42.8283	32.298	54.1988	13.4223	7.7666	16.7065	43.1084	12.6318

## Sheet: DEG_Filtered_Down
Table S3. DEG filtered genes-downregulated
Index	ensembl_gene_id	symbol	entrezgene	description	baseMean	log2FoldChange	lfcSE	stat	pvalue	padj	2CE-1	2CE-2	2CE-3	C-1	C-2	C-3	ICRL_2CE.norm.count.mean	ICRL_C.norm.count.mean
4	ENSMUSG00000000056	Narf	67608	nuclear prelamin A recognition factor [Source:MGI Symbol;Acc:MGI:1914858]	511.843	-2.01696	0.480329	-4.19913	2.67946e-05	0.000309475	75.274	379.203	153.563	835.343	935.875	691.8	202.68	821.006
5	ENSMUSG00000000058	Cav2	12390	caveolin 2 [Source:MGI Symbol;Acc:MGI:107571]	65.4268	-1.22655	0.369899	-3.3159	0.000913501	0.00579038	31.1479	52.6338	33.5516	78.1654	85.4326	111.63	39.1111	91.7425
11	ENSMUSG00000000126	Wnt9a	216795	wingless-type MMTV integration site family, member 9A [Source:MGI Symbol;Acc:MGI:2446084]	9.18907	-2.38979	0.869515	-2.74842	0.00598832	0.0260073	2.59566	2.39245	3.87134	8.68504	17.0865	20.5034	2.95315	15.425
15	ENSMUSG00000000142	Axin2	12006	axin 2 [Source:MGI Symbol;Acc:MGI:1270862]	20.3315	-2.3344	0.613434	-3.80546	0.000141541	0.00123489	3.89348	5.98112	10.3236	44.2147	27.9597	29.616	6.73273	33.9302
19	ENSMUSG00000000157	Itgb2l	16415	integrin beta 2-like [Source:MGI Symbol;Acc:MGI:1277979]	22.9181	-3.66135	0.728987	-5.02252	5.09991e-07	9.99594e-06	5.19131	3.58867	1.29045	25.2656	52.8129	49.36	3.35681	42.4795
80	ENSMUSG00000000686	Abhd15	67477	abhydrolase domain containing 15 [Source:MGI Symbol;Acc:MGI:1914727]	180.153	-1.97362	0.405647	-4.86536	1.14251e-06	2.04391e-05	38.9348	123.211	56.7797	316.609	279.597	265.785	72.9752	287.331
95	ENSMUSG00000000791	Il12rb1	16161	interleukin 12 receptor, beta 1 [Source:MGI Symbol;Acc:MGI:104579]	36.0287	-1.58525	0.46506	-3.4087	0.000652728	0.00438978	20.7652	20.3358	12.9045	37.1088	57.4728	67.5853	18.0018	54.0556
98	ENSMUSG00000000823	Zfp512b	269401	zinc finger protein 512B [Source:MGI Symbol;Acc:MGI:2685478]	286.016	-1.36501	0.341085	-4.00198	6.28148e-05	0.000633473	106.422	244.03	129.045	368.719	439.589	428.293	159.832	412.201
116	ENSMUSG00000001018	Snapin	20615	SNAP-associated protein [Source:MGI Symbol;Acc:MGI:1333745]	155.56	-1.11044	0.3779	-2.93846	0.00329845	0.0162468	50.6153	138.762	105.817	181.596	212.805	243.763	98.398	212.721
125	ENSMUSG00000001062	Vps9d1	72325	VPS9 domain containing 1 [Source:MGI Symbol;Acc:MGI:1914143]	124.014	-1.52914	0.325345	-4.70006	2.60079e-06	4.13526e-05	66.1892	83.7356	41.2943	166.595	193.388	192.884	63.7397	184.289
126	ENSMUSG00000001065	Zfp276	57247	zinc finger protein (C2H2 type) 276 [Source:MGI Symbol;Acc:MGI:1888495]	154.11	-1.84825	0.282763	-6.53638	6.30255e-11	3.11701e-09	59.7001	55.0263	86.46	234.496	236.105	252.875	67.0621	241.159
145	ENSMUSG00000001151	Pcnt	18541	pericentrin (kendrin) [Source:MGI Symbol;Acc:MGI:102722]	140.68	-1.13806	0.306684	-3.71085	0.000206564	0.00167108	67.4871	99.2865	96.7835	236.865	155.332	188.328	87.8524	193.508
253	ENSMUSG00000001983	Taco1	70207	translational activator of mitochondrially encoded cytochrome c oxidase I [Source:MGI Symbol;Acc:MGI:1917457]	149.032	-1.56042	0.355738	-4.38643	1.15224e-05	0.000150445	49.3175	116.034	60.651	232.127	212.805	223.259	75.334	222.73
263	ENSMUSG00000002017	Fam98a	72722	family with sequence similarity 98, member A [Source:MGI Symbol;Acc:MGI:1919972]	267.541	-1.26137	0.232475	-5.42581	5.76926e-08	1.48267e-06	137.57	173.452	161.306	371.088	417.066	344.761	157.443	377.638
267	ENSMUSG00000002032	Tmem25	71687	transmembrane protein 25 [Source:MGI Symbol;Acc:MGI:1918937]	128.826	-3.68156	0.481359	-7.64826	2.03716e-14	1.71576e-12	15.5739	33.4943	6.45224	272.394	274.938	170.102	18.5068	239.145
285	ENSMUSG00000002205	Vrk3	101568	vaccinia related kinase 3 [Source:MGI Symbol;Acc:MGI:2182465]	193.561	-1.14342	0.318223	-3.59313	0.000326733	0.00245634	110.315	168.667	82.5886	234.496	287.364	277.935	120.524	266.598
289	ENSMUSG00000002227	Mov10	17454	Moloney leukemia virus 10 [Source:MGI Symbol;Acc:MGI:97054]	153.011	-1.50304	0.268988	-5.58774	2.30039e-08	6.65588e-07	68.7849	98.0903	72.265	219.495	239.211	220.222	79.7134	226.309
307	ENSMUSG00000002343	Armc6	76813	armadillo repeat containing 6 [Source:MGI Symbol;Acc:MGI:1924063]	33.8469	-1.51351	0.445065	-3.40065	0.000672258	0.0045028	11.6805	21.532	19.3567	50.5311	56.6962	43.285	17.5231	50.1708
317	ENSMUSG00000002409	Dyrk1b	13549	dual-specificity tyrosine-(Y)-phosphorylation regulated kinase 1b [Source:MGI Symbol;Acc:MGI:1330302]	52.7117	-1.2042	0.37922	-3.17546	0.00149597	0.00864798	28.5522	32.298	34.8421	76.5863	89.3159	54.6757	31.8974	73.526
320	ENSMUSG00000002428	Hltf	20585	helicase-like transcription factor [Source:MGI Symbol;Acc:MGI:1196437]	124.864	-1.32641	0.464219	-2.8573	0.00427267	0.0198413	44.1261	130.388	38.7134	159.489	162.322	214.147	71.076	178.652
346	ENSMUSG00000002699	Lcp2	16822	lymphocyte cytosolic protein 2 [Source:MGI Symbol;Acc:MGI:1321402]	41.3945	-1.35147	0.43702	-3.09246	0.00198505	0.0108871	15.5739	33.4943	20.6472	71.0594	57.4728	50.1194	23.2384	59.5506
353	ENSMUSG00000002748	Baz1b	22385	bromodomain adjacent to zinc finger domain, 1B [Source:MGI Symbol;Acc:MGI:1353499]	703.469	-1.55619	0.203265	-7.65598	1.91837e-14	1.63186e-12	397.135	320.588	353.583	1038.26	1133.92	977.329	357.102	1049.84
359	ENSMUSG00000002781	Tmem143	70209	transmembrane protein 143 [Source:MGI Symbol;Acc:MGI:1917459]	99.9423	-1.93787	0.446636	-4.3388	1.43263e-05	0.000181349	19.4674	68.1847	36.1325	133.434	202.708	139.727	41.2616	158.623
361	ENSMUSG00000002803	Btbd6	399566	BTB (POZ) domain containing 6 [Source:MGI Symbol;Acc:MGI:3026623]	71.9996	-1.23361	0.357521	-3.45046	0.000559637	0.00387037	55.8066	37.0829	36.1325	82.1131	97.0825	123.78	43.0073	100.992
396	ENSMUSG00000003031	Cdkn1b	12576	cyclin-dependent kinase inhibitor 1B [Source:MGI Symbol;Acc:MGI:104565]	276.807	-1.47453	0.213739	-6.89873	5.24694e-12	3.12119e-10	141.463	148.332	149.692	385.3	408.523	427.534	146.496	407.119
417	ENSMUSG00000003184	Irf3	54131	interferon regulatory factor 3 [Source:MGI Symbol;Acc:MGI:1859179]	332.76	-1.2429	0.300189	-4.14038	3.46733e-05	0.000385302	188.185	271.543	132.916	502.153	460.559	441.203	197.548	467.972
434	ENSMUSG00000003344	Btbd2	208198	BTB (POZ) domain containing 2 [Source:MGI Symbol;Acc:MGI:1933831]	108.122	-1.5477	0.378617	-4.08778	4.35528e-05	0.000466602	36.3392	87.3243	41.2943	164.226	163.875	155.674	54.9859	161.258
439	ENSMUSG00000003355	Fkbp11	66120	FK506 binding protein 11 [Source:MGI Symbol;Acc:MGI:1913370]	92.0655	-1.11337	0.378201	-2.94387	0.00324137	0.0160187	33.7435	82.5394	58.0701	134.223	104.849	138.967	58.1177	126.013
469	ENSMUSG00000003555	Cyp17a1	13074	cytochrome P450, family 17, subfamily a, polypeptide 1 [Source:MGI Symbol;Acc:MGI:88586]	60.6397	-1.72618	0.436521	-3.95441	7.67224e-05	0.0007463	24.6587	27.5131	32.2612	140.54	63.6861	75.1791	28.1443	93.135
474	ENSMUSG00000003585	Sec14l2	67815	SEC14-like lipid binding 2 [Source:MGI Symbol;Acc:MGI:1915065]	2502.75	-1.16741	0.47337	-2.46618	0.0136564	0.0499435	730.677	3009.7	885.247	3636.66	3765.25	2988.94	1541.87	3463.62
478	ENSMUSG00000003644	Rps6ka1	20111	ribosomal protein S6 kinase polypeptide 1 [Source:MGI Symbol;Acc:MGI:104558]	140.844	-1.51494	0.294944	-5.13636	2.80108e-07	5.9643e-06	64.8914	94.5016	59.3606	183.965	222.125	220.222	72.9179	208.77
500	ENSMUSG00000003865	Gys1	14936	glycogen synthase 1, muscle [Source:MGI Symbol;Acc:MGI:101805]	25.7594	-1.43036	0.492675	-2.90325	0.00369316	0.0177003	16.8718	9.56979	15.4854	44.2147	37.2797	31.1348	13.9756	37.5431
507	ENSMUSG00000003949	Hlf	217082	hepatic leukemia factor [Source:MGI Symbol;Acc:MGI:96108]	483.885	-2.06081	0.519239	-3.9689	7.22058e-05	0.000711313	86.9545	388.773	85.1695	859.819	729.283	753.31	186.966	780.804
553	ENSMUSG00000004462	Tbccd1	70573	TBCC domain containing 1 [Source:MGI Symbol;Acc:MGI:1917823]	224.88	-1.56153	0.323073	-4.83337	1.34243e-06	2.36427e-05	96.0393	166.275	78.7173	325.294	319.207	363.746	113.677	336.082
555	ENSMUSG00000004500	Zfp324	243834	zinc finger protein 324 [Source:MGI Symbol;Acc:MGI:2444641]	39.9488	-3.78206	0.572365	-6.60777	3.90139e-11	2.01746e-09	1.29783	9.56979	5.16179	64.743	77.666	81.2542	5.34313	74.5544
561	ENSMUSG00000004561	Mettl17	52535	methyltransferase like 17 [Source:MGI Symbol;Acc:MGI:1098577]	97.8862	-1.17445	0.328941	-3.57039	0.000356444	0.00265043	40.2327	75.3621	64.5224	120.011	142.905	144.283	60.039	135.733
562	ENSMUSG00000004562	Arhgef40	268739	Rho guanine nucleotide exchange factor (GEF) 40 [Source:MGI Symbol;Acc:MGI:2685515]	123.656	-1.56567	0.347828	-4.50127	6.75498e-06	9.52225e-05	67.4871	68.1847	51.6179	216.336	119.606	218.703	62.4299	184.882
563	ENSMUSG00000004565	Pnpla6	50767	patatin-like phospholipase domain containing 6 [Source:MGI Symbol;Acc:MGI:1354723]	187.125	-1.4339	0.370043	-3.87496	0.000106644	0.000981785	85.6566	157.901	59.3606	288.185	242.318	289.326	100.973	273.276
581	ENSMUSG00000004730	Adgre1	13733	adhesion G protein-coupled receptor E1 [Source:MGI Symbol;Acc:MGI:106912]	121.306	-1.23398	0.387192	-3.18701	0.00143753	0.00837761	76.5718	84.9319	55.4892	257.393	128.149	125.299	72.331	170.28
583	ENSMUSG00000004768	Rab23	19335	RAB23, member RAS oncogene family [Source:MGI Symbol;Acc:MGI:99833]	81.1156	-1.11356	0.349568	-3.18553	0.0014449	0.00840687	58.4023	49.0452	46.4561	83.6922	103.296	145.802	51.3012	110.93
587	ENSMUSG00000004798	Ulk2	29869	unc-51 like kinase 2 [Source:MGI Symbol;Acc:MGI:1352758]	440.136	-1.40551	0.270899	-5.18833	2.12188e-07	4.67006e-06	185.589	316.999	220.666	716.911	617.444	583.208	241.085	639.188
662	ENSMUSG00000005501	Usp40	227334	ubiquitin specific peptidase 40 [Source:MGI Symbol;Acc:MGI:2443184]	302.04	-2.50441	0.274801	-9.11354	7.97392e-20	1.41313e-17	71.3805	118.426	81.2982	478.467	490.849	571.817	90.3683	513.711
663	ENSMUSG00000005505	Kbtbd4	67136	kelch repeat and BTB (POZ) domain containing 4 [Source:MGI Symbol;Acc:MGI:1914386]	40.4921	-1.28417	0.393438	-3.26396	0.00109867	0.00675765	20.7652	20.3358	29.6803	60.0057	58.2495	53.9163	23.5938	57.3905
670	ENSMUSG00000005566	Trim28	21849	tripartite motif-containing 28 [Source:MGI Symbol;Acc:MGI:109274]	455.682	-1.01089	0.212872	-4.74883	2.04601e-06	3.40528e-05	327.053	325.373	254.218	626.902	612.785	587.764	302.214	609.15
684	ENSMUSG00000005674	Tomm40l	641376	translocase of outer mitochondrial membrane 40-like [Source:MGI Symbol;Acc:MGI:3589112]	133.839	-3.02224	0.444324	-6.80188	1.03261e-11	5.89524e-10	18.1696	52.6338	16.7758	208.441	295.907	211.109	29.1931	238.486
685	ENSMUSG00000005677	Nr1i3	12355	nuclear receptor subfamily 1, group I, member 3 [Source:MGI Symbol;Acc:MGI:1346307]	536.217	-2.23821	0.3098	-7.22471	5.02172e-13	3.47295e-11	115.507	259.58	187.115	846.397	949.078	859.624	187.401	885.033
695	ENSMUSG00000005774	Rfx5	53970	regulatory factor X, 5 (influences HLA class II expression) [Source:MGI Symbol;Acc:MGI:1858421]	86.9042	-1.4729	0.348332	-4.22843	2.3533e-05	0.000277071	50.6153	33.4943	54.1988	99.4832	153.779	129.855	46.1028	127.706
710	ENSMUSG00000005893	Nr2c2	22026	nuclear receptor subfamily 2, group C, member 2 [Source:MGI Symbol;Acc:MGI:1352466]	170.654	-1.47867	0.254854	-5.80203	6.5515e-09	2.15591e-07	92.1458	77.7545	100.655	268.447	258.628	226.297	90.1851	251.124
716	ENSMUSG00000005951	Shpk	74637	sedoheptulokinase [Source:MGI Symbol;Acc:MGI:1921887]	413.611	-1.36259	0.364144	-3.7419	0.000182634	0.00151273	115.507	332.55	246.475	604.795	545.215	637.124	231.511	595.711
754	ENSMUSG00000006310	Zbtb32	58206	zinc finger and BTB domain containing 32 [Source:MGI Symbol;Acc:MGI:1891838]	16.3251	-2.45354	0.647258	-3.79066	0.000150245	0.0012949	3.89348	4.78489	6.45224	22.8969	31.0664	28.8566	5.04354	27.6066
778	ENSMUSG00000006463	Zdhhc24	70605	zinc finger, DHHC domain containing 24 [Source:MGI Symbol;Acc:MGI:1917855]	25.5744	-1.56299	0.562301	-2.77964	0.00544198	0.0240292	3.89348	16.7471	18.0663	40.267	36.503	37.9693	12.9023	38.2464
782	ENSMUSG00000006494	Pdk1	228026	pyruvate dehydrogenase kinase, isoenzyme 1 [Source:MGI Symbol;Acc:MGI:1926119]	668.53	-1.06664	0.222893	-4.78542	1.70628e-06	2.92042e-05	350.414	496.433	449.076	956.144	836.462	922.653	431.974	905.086
791	ENSMUSG00000006567	Atp7b	11979	ATPase, Cu++ transporting, beta polypeptide [Source:MGI Symbol;Acc:MGI:103297]	287.086	-1.58697	0.492082	-3.22502	0.00125965	0.00753533	79.1675	283.505	67.1033	463.465	376.68	452.594	143.259	430.913
799	ENSMUSG00000006641	Slc5a6	330064	solute carrier family 5 (sodium-dependent vitamin transporter), member 6 [Source:MGI Symbol;Acc:MGI:2660847]	132.055	-1.51418	0.357661	-4.23356	2.30023e-05	0.00027214	40.2327	83.7356	81.2982	206.072	229.115	151.877	68.4222	195.688
805	ENSMUSG00000006711	D130043K22Rik	210108	RIKEN cDNA D130043K22 gene [Source:MGI Symbol;Acc:MGI:3036268]	25.0711	-2.00445	0.638466	-3.13948	0.00169248	0.00960447	12.9783	14.3547	2.58089	41.8461	54.3662	24.3003	9.97128	40.1709
806	ENSMUSG00000006715	Gmnn	57441	geminin [Source:MGI Symbol;Acc:MGI:1927344]	46.3404	-1.71724	0.541002	-3.17419	0.00150256	0.00868308	5.19131	31.1018	28.3898	71.0594	81.5493	60.7508	21.561	71.1198
836	ENSMUSG00000007050	Lsm2	27756	LSM2 homolog, U6 small nuclear RNA and mRNA degradation associated [Source:MGI Symbol;Acc:MGI:90676]	56.1652	-1.49809	0.376865	-3.97514	7.0338e-05	0.000696543	23.3609	29.9056	34.8421	67.1117	80.7726	100.998	29.3695	82.9608
854	ENSMUSG00000007617	Homer1	26556	homer scaffolding protein 1 [Source:MGI Symbol;Acc:MGI:1347345]	157.623	-1.40362	0.320927	-4.37364	1.22193e-05	0.000158088	120.698	71.7734	67.1033	240.812	254.744	190.606	86.5249	228.721
862	ENSMUSG00000007777	0610009B22Rik	66050	RIKEN cDNA 0610009B22 gene [Source:MGI Symbol;Acc:MGI:1913300]	109.519	-1.49072	0.498572	-2.98998	0.00278994	0.0142368	35.0414	111.249	25.8089	165.016	149.895	170.102	57.3664	161.671
866	ENSMUSG00000007827	Ankrd26	232339	ankyrin repeat domain 26 [Source:MGI Symbol;Acc:MGI:1917887]	77.5857	-2.18927	0.434524	-5.03831	4.69651e-07	9.30171e-06	10.3826	38.2791	34.8421	121.591	134.362	126.058	27.8346	127.337
873	ENSMUSG00000007880	Arid1a	93760	AT rich interactive domain 1A (SWI-like) [Source:MGI Symbol;Acc:MGI:1935147]	402.2	-1.13232	0.205486	-5.51046	3.57907e-08	9.72694e-07	259.566	232.067	264.542	525.84	532.789	598.396	252.058	552.341
897	ENSMUSG00000008398	Elk3	13713	ELK3, member of ETS oncogene family [Source:MGI Symbol;Acc:MGI:101762]	72.7746	-1.44818	0.402313	-3.59964	0.000318662	0.00240737	24.6587	58.6149	33.5516	112.906	84.6559	122.261	38.9418	106.607
901	ENSMUSG00000008461	Fut1	14343	fucosyltransferase 1 [Source:MGI Symbol;Acc:MGI:109375]	4.7246	-5.3499	1.7105	-3.12768	0.00176193	0.00992243	0	0	0	1.5791	8.54326	18.2252	0	9.4492
923	ENSMUSG00000009030	Pdcl	67466	phosducin-like [Source:MGI Symbol;Acc:MGI:1914716]	233.831	-1.34805	0.255919	-5.26749	1.383e-07	3.24092e-06	154.442	131.585	109.688	301.608	384.447	321.22	131.905	335.758
932	ENSMUSG00000009145	Dqx1	93838	DEAQ RNA-dependent ATPase [Source:MGI Symbol;Acc:MGI:2136388]	72.614	-1.57772	0.466677	-3.38075	0.000722874	0.00478159	24.6587	58.6149	25.8089	97.9041	73.7827	154.915	36.3609	108.867
938	ENSMUSG00000009376	Met	17295	met proto-oncogene [Source:MGI Symbol;Acc:MGI:96969]	1079.33	-1.35823	0.250254	-5.4274	5.71808e-08	1.47396e-06	602.192	732.089	482.627	1325.65	1831.36	1502.06	605.636	1553.03
939	ENSMUSG00000009378	Slc16a12	240638	solute carrier family 16 (monocarboxylic acid transporters), member 12 [Source:MGI Symbol;Acc:MGI:2147716]	1678.14	-1.74748	0.328773	-5.31514	1.06575e-07	2.55016e-06	442.559	1093.35	774.268	2307.06	2799.86	2651.77	770.059	2586.23
950	ENSMUSG00000009575	Cbx5	12419	chromobox 5 [Source:MGI Symbol;Acc:MGI:109372]	338.752	-1.64274	0.329495	-4.98564	6.17566e-07	1.188e-05	97.3371	223.694	171.629	539.262	567.738	432.85	164.22	513.283
962	ENSMUSG00000009733	Tfcp2	21422	transcription factor CP2 [Source:MGI Symbol;Acc:MGI:98509]	70.4399	-1.30341	0.337353	-3.86365	0.000111707	0.00102286	45.424	46.6527	29.6803	98.6936	111.062	91.1262	40.5857	100.294
965	ENSMUSG00000009772	Nuak2	74137	NUAK family, SNF1-like kinase, 2 [Source:MGI Symbol;Acc:MGI:1921387]	58.3779	-1.09659	0.385668	-2.84336	0.00446406	0.0204874	36.3392	25.1207	50.3274	66.3221	92.4225	79.7354	37.2624	79.4934
972	ENSMUSG00000009995	Taz	66826	tafazzin [Source:MGI Symbol;Acc:MGI:109626]	216.183	-1.33589	0.391572	-3.41162	0.000645773	0.00435283	68.7849	203.358	95.4931	300.029	302.897	326.536	122.545	309.821
979	ENSMUSG00000010057	Nprl2	56032	nitrogen permease regulator-like 2 [Source:MGI Symbol;Acc:MGI:1914482]	74.0142	-1.36268	0.422251	-3.22719	0.00125011	0.00748878	28.5522	65.7923	29.6803	116.853	122.712	80.4948	41.3416	106.687
986	ENSMUSG00000010175	Prox1	19130	prospero homeobox 1 [Source:MGI Symbol;Acc:MGI:97772]	1819.24	-1.03038	0.3868	-2.66387	0.0077248	0.031914	1914.3	1069.42	603.929	2886.59	2335.42	2105.78	1195.88	2442.59
988	ENSMUSG00000010290	AI597479	98404	expressed sequence AI597479 [Source:MGI Symbol;Acc:MGI:2138299]	111.217	-1.32564	0.351183	-3.77479	0.000160145	0.0013582	59.7001	43.064	87.7504	170.543	180.185	126.058	63.5048	158.929
999	ENSMUSG00000010601	Apol7a	75761	apolipoprotein L 7a [Source:MGI Symbol;Acc:MGI:1923011]	493.495	-2.23704	0.515851	-4.3366	1.44702e-05	0.000182898	105.124	348.101	64.5224	931.668	870.636	640.921	172.582	814.408
1026	ENSMUSG00000011427	Zfp790	233056	zinc finger protein 790 [Source:MGI Symbol;Acc:MGI:1923431]	89.9664	-1.15878	0.397444	-2.91558	0.00355027	0.0171788	64.8914	27.5131	74.8459	135.013	129.702	107.833	55.7502	124.183
1030	ENSMUSG00000011832	Evi5l	213027	ecotropic viral integration site 5 like [Source:MGI Symbol;Acc:MGI:2442167]	32.6775	-1.3872	0.430952	-3.21893	0.00128672	0.00765421	14.2761	16.7471	23.2281	47.3729	46.5996	47.8413	18.0838	47.2713
1038	ENSMUSG00000012076	Brms1l	52592	breast cancer metastasis-suppressor 1-like [Source:MGI Symbol;Acc:MGI:1196337]	33.246	-2.26185	0.548835	-4.12119	3.76923e-05	0.000412385	11.6805	3.58867	19.3567	48.1625	56.6962	59.9914	11.5419	54.95
1047	ENSMUSG00000012429	Mplkip	66308	M-phase specific PLK1 intereacting protein [Source:MGI Symbol;Acc:MGI:1913558]	87.0919	-2.27701	0.318427	-7.15079	8.62782e-13	5.68934e-11	28.5522	31.1018	29.6803	134.223	161.545	137.449	29.7781	144.406
1048	ENSMUSG00000012443	Kif11	16551	kinesin family member 11 [Source:MGI Symbol;Acc:MGI:1098231]	11.6185	-2.2009	0.855915	-2.5714	0.0101287	0.0395773	5.19131	7.17734	0	14.2119	27.1831	15.9471	4.12288	19.114
1052	ENSMUSG00000012609	Ttll5	320244	tubulin tyrosine ligase-like family, member 5 [Source:MGI Symbol;Acc:MGI:2443657]	92.8449	-1.51812	0.3317	-4.57678	4.72188e-06	6.96733e-05	49.3175	59.8112	34.8421	123.959	162.322	126.817	47.9902	137.699
1058	ENSMUSG00000013150	Gfod2	70575	glucose-fructose oxidoreductase domain containing 2 [Source:MGI Symbol;Acc:MGI:1917825]	30.4174	-1.37034	0.508681	-2.69392	0.00706177	0.0297676	22.0631	8.37356	20.6472	32.3715	48.9296	50.1194	17.0279	43.8068
1065	ENSMUSG00000013495	Tmem175	72392	transmembrane protein 175 [Source:MGI Symbol;Acc:MGI:1919642]	50.3198	-2.14117	0.551702	-3.88102	0.00010402	0.000962309	5.19131	32.298	18.0663	60.7953	80.7726	104.795	18.5185	82.121
1069	ENSMUSG00000013629	Cad	69719	carbamoyl-phosphate synthetase 2, aspartate transcarbamylase, and dihydroorotase [Source:MGI Symbol;Acc:MGI:1916969]	133.585	-1.33288	0.310955	-4.2864	1.81589e-05	0.000220985	66.1892	98.0903	63.2319	153.173	210.475	210.35	75.8371	191.332
1070	ENSMUSG00000013646	Sh3bp5l	79566	SH3 binding domain protein 5 like [Source:MGI Symbol;Acc:MGI:1933124]	87.5448	-1.5676	0.315988	-4.96094	7.01523e-07	1.33352e-05	48.0196	40.6716	43.8752	132.644	152.225	107.833	44.1888	130.901
1109	ENSMUSG00000014426	Map3k4	26407	mitogen-activated protein kinase kinase kinase 4 [Source:MGI Symbol;Acc:MGI:1346875]	163.361	-1.77513	0.450434	-3.94093	8.11665e-05	0.000781486	63.5936	127.996	29.6803	243.181	243.094	272.619	73.7566	252.965
1111	ENSMUSG00000014453	Blk	12143	B lymphoid kinase [Source:MGI Symbol;Acc:MGI:88169]	3.99968	-5.1086	1.57064	-3.25255	0.00114375	0.00696945	0	0	0	7.89549	6.98994	9.11262	0	7.99935
1118	ENSMUSG00000014547	Wdfy2	268752	WD repeat and FYVE domain containing 2 [Source:MGI Symbol;Acc:MGI:2442811]	231.606	-1.09401	0.234016	-4.67495	2.9402e-06	4.6018e-05	149.25	168.667	125.173	322.926	314.547	309.07	147.697	315.514
1121	ENSMUSG00000014554	Dguok	27369	deoxyguanosine kinase [Source:MGI Symbol;Acc:MGI:1351602]	88.0901	-1.63962	0.361106	-4.54055	5.61071e-06	8.11003e-05	27.2544	43.064	58.0701	152.383	111.839	135.93	42.7962	133.384
1124	ENSMUSG00000014601	Strip1	229707	striatin interacting protein 1 [Source:MGI Symbol;Acc:MGI:2443884]	101.976	-1.03699	0.327953	-3.16202	0.00156677	0.008984	86.9545	65.7923	47.7466	160.278	124.266	126.817	66.8311	137.12
1127	ENSMUSG00000014668	Chfr	231600	checkpoint with forkhead and ring finger domains [Source:MGI Symbol;Acc:MGI:2444898]	135.636	-1.37031	0.280345	-4.88795	1.01891e-06	1.852e-05	58.4023	90.913	77.4268	206.862	194.165	186.049	75.5807	195.692
1129	ENSMUSG00000014763	Fam120b	67544	family with sequence similarity 120, member B [Source:MGI Symbol;Acc:MGI:1914794]	289.485	-1.68207	0.223545	-7.52455	5.29018e-14	4.14755e-12	149.25	126.8	136.787	408.986	479.199	435.887	137.612	441.358
1133	ENSMUSG00000014778	Fhod1	234686	formin homology 2 domain containing 1 [Source:MGI Symbol;Acc:MGI:2679008]	38.4963	-1.15851	0.40718	-2.8452	0.0044384	0.0203917	24.6587	29.9056	16.7758	51.3207	55.9195	52.3976	23.78	53.2126
1135	ENSMUSG00000014837	4931428F04Rik	74356	RIKEN cDNA 4931428F04 gene [Source:MGI Symbol;Acc:MGI:1921606]	6.08299	-3.75832	1.29404	-2.90434	0.00368026	0.0176621	1.29783	1.19622	0	8.68504	11.6499	13.6689	0.83135	11.3346
1136	ENSMUSG00000014850	Msh3	17686	mutS homolog 3 [Source:MGI Symbol;Acc:MGI:109519]	124.887	-1.39112	0.473448	-2.93828	0.00330044	0.0162519	63.5936	118.426	24.5185	191.86	174.748	176.177	68.8461	180.929
1172	ENSMUSG00000015189	Casd1	213819	CAS1 domain containing 1 [Source:MGI Symbol;Acc:MGI:2384865]	333.989	-1.51482	0.339339	-4.46405	8.04256e-06	0.000110168	123.294	267.954	127.754	498.995	523.469	462.466	173.001	494.976
1203	ENSMUSG00000015488	Cacfd1	381356	calcium channel flower domain containing 1 [Source:MGI Symbol;Acc:MGI:1924317]	251.101	-1.05752	0.274665	-3.85023	0.000118009	0.00106906	142.761	212.928	132.916	300.029	357.263	360.708	162.868	339.333
1211	ENSMUSG00000015597	Zfp318	57908	zinc finger protein 318 [Source:MGI Symbol;Acc:MGI:1889348]	348.814	-1.80201	0.232547	-7.74901	9.26109e-15	8.20619e-13	141.463	187.807	136.787	528.208	536.672	561.945	155.353	542.275
1222	ENSMUSG00000015697	Setdb1	84505	SET domain, bifurcated 1 [Source:MGI Symbol;Acc:MGI:1934229]	205.277	-1.10537	0.40609	-2.72197	0.00648939	0.0277397	188.185	78.9507	123.883	300.818	371.243	168.584	130.34	280.215
1253	ENSMUSG00000015942	Gtf2ird2	114674	GTF2I repeat domain containing 2 [Source:MGI Symbol;Acc:MGI:2149780]	42.7653	-1.55025	0.583888	-2.65505	0.00792977	0.0325946	6.48914	43.064	15.4854	63.1639	70.676	57.7133	21.6795	63.8511
1259	ENSMUSG00000015966	Il17rb	50905	interleukin 17 receptor B [Source:MGI Symbol;Acc:MGI:1355292]	101.775	-1.1625	0.405457	-2.86714	0.00414206	0.0193649	45.424	104.071	38.7134	144.487	137.469	140.486	62.7363	140.814
1261	ENSMUSG00000015970	Chdh	218865	choline dehydrogenase [Source:MGI Symbol;Acc:MGI:1860776]	1254.04	-1.7335	0.495972	-3.49516	0.000473774	0.0033697	251.779	1169.91	317.45	1839.65	2067.47	1877.96	579.712	1928.36
1267	ENSMUSG00000016028	Celsr1	12614	cadherin, EGF LAG seven-pass G-type receptor 1 [Source:MGI Symbol;Acc:MGI:1100883]	66.5531	-1.54413	0.593467	-2.60188	0.00927152	0.0368629	22.0631	70.5772	9.03313	106.589	88.5392	102.517	33.8911	99.2151
1293	ENSMUSG00000016503	Gtf3a	66596	general transcription factor III A [Source:MGI Symbol;Acc:MGI:1913846]	13.8716	-2.18923	0.729193	-3.00226	0.00267985	0.0137824	5.19131	8.37356	1.29045	26.0551	24.8531	17.4659	4.95177	22.7914
1308	ENSMUSG00000016758	Bik	12124	BCL2-interacting killer [Source:MGI Symbol;Acc:MGI:1206591]	40.0853	-1.6051	0.42835	-3.74717	0.000178839	0.00149	22.0631	14.3547	23.2281	48.1625	59.8028	72.901	19.8819	60.2888
1313	ENSMUSG00000016933	Plcg1	18803	phospholipase C, gamma 1 [Source:MGI Symbol;Acc:MGI:97615]	430.01	-1.17473	0.267766	-4.38715	1.14848e-05	0.000150069	263.459	338.531	189.696	623.744	568.515	596.117	263.895	596.125
1314	ENSMUSG00000016940	Kctd2	70382	potassium channel tetramerisation domain containing 2 [Source:MGI Symbol;Acc:MGI:1917632]	110.113	-1.25743	0.288371	-4.36046	1.29789e-05	0.000166042	66.1892	71.7734	56.7797	144.487	180.962	140.486	64.9141	155.312
1317	ENSMUSG00000016984	Etaa1	68145	Ewing tumor-associated antigen 1 [Source:MGI Symbol;Acc:MGI:1915395]	54.13	-1.3793	0.404861	-3.40684	0.000657197	0.00441584	35.0414	17.9433	37.423	63.1639	83.8792	87.3293	30.1359	78.1242
1324	ENSMUSG00000017146	Brca1	12189	breast cancer 1, early onset [Source:MGI Symbol;Acc:MGI:104537]	42.7075	-4.27613	0.612364	-6.98299	2.88956e-12	1.80074e-10	1.29783	4.78489	6.45224	60.0057	99.4124	84.2918	4.17832	81.2366
1338	ENSMUSG00000017376	Nlk	18099	nemo like kinase [Source:MGI Symbol;Acc:MGI:1201387]	127.161	-1.65736	0.337326	-4.91323	8.95897e-07	1.64599e-05	40.2327	83.7356	59.3606	197.387	217.465	164.787	61.1096	193.213
1354	ENSMUSG00000017491	Rarb	218772	retinoic acid receptor, beta [Source:MGI Symbol;Acc:MGI:97857]	16.9428	-1.62282	0.651534	-2.49076	0.0127469	0.0472674	2.59566	13.1585	9.03313	31.582	21.7465	23.5409	8.26241	25.6231
1361	ENSMUSG00000017639	Rab11fip4	268451	RAB11 family interacting protein 4 (class II) [Source:MGI Symbol;Acc:MGI:2442920]	118.583	-1.03201	0.403168	-2.55976	0.0104743	0.0406255	62.2957	122.015	49.037	201.335	154.555	122.261	77.7825	159.384
1370	ENSMUSG00000017713	Tha1	71776	threonine aldolase 1 [Source:MGI Symbol;Acc:MGI:1919026]	64.6422	-1.62364	0.558183	-2.9088	0.00362822	0.0174616	14.2761	40.6716	40.0039	49.7416	75.336	167.824	31.6505	97.6339
1372	ENSMUSG00000017716	Birc5	11799	baculoviral IAP repeat-containing 5 [Source:MGI Symbol;Acc:MGI:1203517]	9.28248	-2.96464	0.957732	-3.09548	0.00196495	0.0108047	1.29783	1.19622	3.87134	11.8432	12.4266	25.0597	2.1218	16.4432
1381	ENSMUSG00000017756	Slc12a7	20499	solute carrier family 12, member 7 [Source:MGI Symbol;Acc:MGI:1342283]	665.913	-1.09742	0.289075	-3.79632	0.000146859	0.00127151	454.24	541.889	276.156	888.243	831.803	1003.15	424.095	907.731
1386	ENSMUSG00000017776	Crk	12928	v-crk avian sarcoma virus CT10 oncogene homolog [Source:MGI Symbol;Acc:MGI:88508]	917.903	-1.1072	0.257657	-4.29721	1.72964e-05	0.000212312	641.127	671.081	433.59	1322.49	1398.76	1040.36	581.933	1253.87
1412	ENSMUSG00000018166	Erbb3	13867	erb-b2 receptor tyrosine kinase 3 [Source:MGI Symbol;Acc:MGI:95411]	1493.1	-2.43639	0.32243	-7.55635	4.14529e-14	3.34236e-12	406.22	681.847	308.417	2095.46	2552.88	2913.76	465.495	2520.7
1439	ENSMUSG00000018387	Shroom1	71774	shroom family member 1 [Source:MGI Symbol;Acc:MGI:1919024]	201.078	-1.18564	0.242184	-4.8956	9.80085e-07	1.78716e-05	121.996	132.781	113.559	258.972	261.734	317.423	122.779	279.376
1440	ENSMUSG00000018395	Kif3a	16568	kinesin family member 3A [Source:MGI Symbol;Acc:MGI:107689]	40.5083	-1.69127	0.450371	-3.75527	0.000173152	0.00144829	15.5739	27.5131	14.1949	48.1625	75.336	62.2696	19.094	61.9227
1442	ENSMUSG00000018401	Mtmr4	170749	myotubularin related protein 4 [Source:MGI Symbol;Acc:MGI:2180699]	490.743	-1.51027	0.303201	-4.98109	6.32272e-07	1.21409e-05	193.376	366.044	205.181	773.758	636.084	770.017	254.867	726.62
1450	ENSMUSG00000018428	Akap1	11640	A kinase (PRKA) anchor protein 1 [Source:MGI Symbol;Acc:MGI:104729]	913.342	-1.18253	0.391667	-3.01923	0.00253416	0.0131887	401.029	955.782	318.74	1347.76	1200.72	1256.02	558.517	1268.17
1467	ENSMUSG00000018547	Pip4k2b	108083	phosphatidylinositol-5-phosphate 4-kinase, type II, beta [Source:MGI Symbol;Acc:MGI:1934234]	139.302	-2.07942	0.275963	-7.53513	4.87862e-14	3.86046e-12	57.1044	55.0263	47.7466	242.392	236.105	197.44	53.2924	225.312
1468	ENSMUSG00000018548	Trim37	68729	tripartite motif-containing 37 [Source:MGI Symbol;Acc:MGI:2153072]	157.28	-1.13662	0.294527	-3.85912	0.000113795	0.00103828	88.2523	131.585	74.8459	225.811	214.358	208.831	98.2276	216.333
1479	ENSMUSG00000018599	Mief2	237781	mitochondrial elongation factor 2 [Source:MGI Symbol;Acc:MGI:2144199]	121.631	-1.09905	0.367985	-2.98666	0.0028204	0.0143577	60.9979	106.464	64.5224	199.756	187.175	110.87	77.328	165.934
1480	ENSMUSG00000018604	Tbx3	21386	T-box 3 [Source:MGI Symbol;Acc:MGI:98495]	113.243	-2.74998	0.336031	-8.18372	2.75208e-16	3.0602e-14	32.4457	34.6905	20.6472	224.232	166.205	201.237	29.2611	197.225
1482	ENSMUSG00000018651	Tada2a	217031	transcriptional adaptor 2A [Source:MGI Symbol;Acc:MGI:2144471]	51.9368	-1.42157	0.385869	-3.68407	0.000229542	0.00182999	27.2544	22.7282	34.8421	60.0057	90.0925	76.6979	28.2749	75.5987
1493	ENSMUSG00000018727	Cpsf4l	52670	cleavage and polyadenylation specific factor 4-like [Source:MGI Symbol;Acc:MGI:1277182]	96.9707	-3.45797	0.52355	-6.60485	3.97913e-11	2.04523e-09	3.89348	26.3169	18.0663	183.175	115.722	234.65	16.0922	177.849
1505	ENSMUSG00000018809	Smyd4	319822	SET and MYND domain containing 4 [Source:MGI Symbol;Acc:MGI:2442796]	31.6118	-1.41817	0.48103	-2.9482	0.00319628	0.0158584	9.0848	16.7471	25.8089	48.1625	45.8229	44.0443	17.2136	46.0099
1510	ENSMUSG00000018841	Rad51d	19364	RAD51 paralog D [Source:MGI Symbol;Acc:MGI:1261809]	97.6085	-1.03102	0.398726	-2.58579	0.00971571	0.0382889	48.0196	104.071	40.0039	131.065	125.042	137.449	64.0316	131.185
1514	ENSMUSG00000018849	Wwc1	211652	WW, C2 and coiled-coil domain containing 1 [Source:MGI Symbol;Acc:MGI:2388637]	500.95	-1.03787	0.381469	-2.72071	0.00651414	0.0278275	495.77	332.55	156.144	620.586	732.39	668.259	328.155	673.745
1518	ENSMUSG00000018899	Irf1	16362	interferon regulatory factor 1 [Source:MGI Symbol;Acc:MGI:96590]	135.952	-1.37995	0.356092	-3.87525	0.000106516	0.000981135	71.3805	80.147	74.8459	150.804	289.694	148.839	75.4578	196.446
1532	ENSMUSG00000018999	Slc35b4	58246	solute carrier family 35, member B4 [Source:MGI Symbol;Acc:MGI:1931249]	150.053	-1.53246	0.520383	-2.94487	0.00323091	0.0159743	50.6153	151.92	28.3898	251.866	232.998	184.531	76.9752	223.132
1562	ENSMUSG00000019312	Grb7	14786	growth factor receptor bound protein 7 [Source:MGI Symbol;Acc:MGI:102683]	432.287	-1.55711	0.379782	-4.10002	4.13123e-05	0.000446252	162.228	364.848	130.335	609.532	688.897	637.884	219.137	645.438
1595	ENSMUSG00000019718	L3hypdh	67217	L-3-hydroxyproline dehydratase (trans-) [Source:MGI Symbol;Acc:MGI:1914467]	156.214	-1.77645	0.421674	-4.21285	2.52169e-05	0.000294048	37.637	120.819	52.9083	266.868	256.298	202.756	70.4546	241.974
1600	ENSMUSG00000019737	Syne4	233066	spectrin repeat containing, nuclear envelope family member 4 [Source:MGI Symbol;Acc:MGI:2141950]	24.4829	-2.03272	0.60756	-3.34571	0.000820718	0.00530706	11.6805	11.9622	5.16179	20.5283	50.4829	47.0819	9.60149	39.3643
1605	ENSMUSG00000019768	Esr1	13982	estrogen receptor 1 (alpha) [Source:MGI Symbol;Acc:MGI:1352467]	318.014	-1.86306	0.364504	-5.11122	3.20093e-07	6.69009e-06	120.698	178.237	112.269	295.291	693.557	508.029	137.068	498.959
1624	ENSMUSG00000019813	Cep57l1	103268	centrosomal protein 57-like 1 [Source:MGI Symbol;Acc:MGI:1915511]	27.1051	-1.93466	0.527889	-3.6649	0.000247433	0.00194527	9.0848	16.7471	7.74268	32.3715	45.0463	51.6382	11.1915	43.0187
1636	ENSMUSG00000019841	Rev3l	19714	REV3 like, DNA directed polymerase zeta catalytic subunit [Source:MGI Symbol;Acc:MGI:1337131]	358.453	-1.39403	0.284418	-4.90135	9.51788e-07	1.74116e-05	194.674	258.384	139.368	562.949	536.672	458.669	197.476	519.43
1640	ENSMUSG00000019846	Lama4	16775	laminin, alpha 4 [Source:MGI Symbol;Acc:MGI:109321]	59.287	-1.55507	0.387107	-4.01715	5.89069e-05	0.000600469	20.7652	35.8867	33.5516	92.3772	68.3461	104.795	30.0679	88.5062
1655	ENSMUSG00000019876	Pkib	18768	protein kinase inhibitor beta, cAMP dependent, testis specific [Source:MGI Symbol;Acc:MGI:101937]	4.33137	-4.19364	1.50766	-2.78156	0.00540982	0.0239182	0	1.19622	0	7.89549	8.54326	8.35324	0.398741	8.26399
1664	ENSMUSG00000019906	Lin7a	108030	lin-7 homolog A (C. elegans) [Source:MGI Symbol;Acc:MGI:2135609]	184.168	-2.39754	0.479291	-5.00226	5.66619e-07	1.09669e-05	27.2544	112.445	36.1325	258.183	361.923	309.07	58.6106	309.725
1667	ENSMUSG00000019917	Sept10	103080	septin 10 [Source:MGI Symbol;Acc:MGI:1918110]	148.615	-1.0598	0.300655	-3.52497	0.000423527	0.00305835	116.805	107.66	64.5224	189.492	209.698	203.515	96.329	200.902
1672	ENSMUSG00000019935	Slc17a8	216227	solute carrier family 17 (sodium-dependent inorganic phosphate cotransporter), member 8 [Source:MGI Symbol;Acc:MGI:3039629]	514.959	-2.3892	0.434213	-5.50237	3.74713e-08	1.0119e-06	68.7849	241.637	184.534	1174.85	814.716	605.23	164.985	864.932
1686	ENSMUSG00000019971	Cep290	216274	centrosomal protein 290 [Source:MGI Symbol;Acc:MGI:2384917]	55.5171	-1.32815	0.389385	-3.41089	0.000647524	0.0043629	37.637	25.1207	32.2612	56.8475	90.8692	90.3668	31.673	79.3612
1691	ENSMUSG00000019984	Med23	70208	mediator complex subunit 23 [Source:MGI Symbol;Acc:MGI:1917458]	139.421	-1.18241	0.28865	-4.09633	4.19746e-05	0.000452258	109.018	65.7923	81.2982	183.965	207.368	189.087	85.3693	193.473
1695	ENSMUSG00000019989	Enpp3	209558	ectonucleotide pyrophosphatase/phosphodiesterase 3 [Source:MGI Symbol;Acc:MGI:2143702]	457.908	-1.09985	0.365164	-3.01192	0.00259597	0.0134568	240.098	459.35	174.21	736.649	561.525	575.614	291.219	624.596
1696	ENSMUSG00000019990	Pde7b	29863	phosphodiesterase 7B [Source:MGI Symbol;Acc:MGI:1352752]	115.447	-1.43233	0.503118	-2.84691	0.00441463	0.0203177	33.7435	119.622	33.5516	182.386	199.602	123.78	62.3058	168.589
1713	ENSMUSG00000020027	Socs2	216233	suppressor of cytokine signaling 2 [Source:MGI Symbol;Acc:MGI:1201787]	198.76	-1.07527	0.384966	-2.79316	0.00521967	0.0232832	144.059	151.92	87.7504	157.91	381.34	269.582	127.91	269.61
1718	ENSMUSG00000020038	Cry1	12952	cryptochrome 1 (photolyase-like) [Source:MGI Symbol;Acc:MGI:1270841]	86.5241	-1.41848	0.298588	-4.75063	2.0278e-06	3.38225e-05	48.0196	43.064	50.3274	139.75	115.722	122.261	47.137	125.911
1728	ENSMUSG00000020069	Hnrnph3	432467	heterogeneous nuclear ribonucleoprotein H3 [Source:MGI Symbol;Acc:MGI:1926462]	108.65	-1.51564	0.298827	-5.07197	3.93718e-07	8.00277e-06	50.6153	53.83	64.5224	157.91	136.692	188.328	56.3226	160.976
1738	ENSMUSG00000020085	Aifm2	71361	apoptosis-inducing factor, mitochondrion-associated 2 [Source:MGI Symbol;Acc:MGI:1918611]	298.55	-1.34026	0.262194	-5.1117	3.19275e-07	6.68121e-06	150.548	211.732	144.53	453.991	465.996	364.505	168.937	428.164
1748	ENSMUSG00000020100	Slc29a3	71279	solute carrier family 29 (nucleoside transporters), member 3 [Source:MGI Symbol;Acc:MGI:1918529]	53.7494	-1.64655	0.368704	-4.46578	7.97776e-06	0.000109456	24.6587	26.3169	27.0994	65.5326	87.7625	91.1262	26.025	81.4738
1750	ENSMUSG00000020102	Slc16a7	20503	solute carrier family 16 (monocarboxylic acid transporters), member 7 [Source:MGI Symbol;Acc:MGI:1330284]	770.279	-1.0561	0.304366	-3.46984	0.000520764	0.00366106	316.67	665.1	518.76	1086.42	1141.69	893.037	500.177	1040.38
1751	ENSMUSG00000020105	Lrig3	320398	leucine-rich repeats and immunoglobulin-like domains 3 [Source:MGI Symbol;Acc:MGI:2443955]	107.617	-1.40935	0.276931	-5.08919	3.5959e-07	7.4244e-06	60.9979	55.0263	60.651	150.804	172.418	145.802	58.8917	156.341
1766	ENSMUSG00000020131	Pcsk4	18551	proprotein convertase subtilisin/kexin type 4 [Source:MGI Symbol;Acc:MGI:97514]	91.6944	-1.37296	0.363387	-3.77823	0.000157949	0.0013436	38.9348	76.5583	37.423	121.591	136.692	138.967	50.972	132.417
1770	ENSMUSG00000020137	Thap2	66816	THAP domain containing, apoptosis associated protein 2 [Source:MGI Symbol;Acc:MGI:1914066]	113.985	-2.50371	0.37435	-6.68815	2.26011e-11	1.21581e-09	24.6587	25.1207	52.9083	161.068	214.358	205.793	34.2293	193.74
1771	ENSMUSG00000020140	Lgr5	14160	leucine rich repeat containing G protein coupled receptor 5 [Source:MGI Symbol;Acc:MGI:1341817]	19.8692	-2.57381	0.879315	-2.92706	0.00342184	0.0167191	2.59566	14.3547	0	42.6357	17.8632	41.7662	5.65011	34.0883
1779	ENSMUSG00000020156	Mum1	68114	melanoma associated antigen (mutated) 1 [Source:MGI Symbol;Acc:MGI:1915364]	66.857	-1.13229	0.320782	-3.52976	0.000415929	0.00301115	38.9348	46.6527	40.0039	85.2713	87.7625	102.517	41.8638	91.8503
1780	ENSMUSG00000020160	Meis1	17268	Meis homeobox 1 [Source:MGI Symbol;Acc:MGI:104717]	27.1327	-1.98318	0.648761	-3.05688	0.00223655	0.0119505	19.4674	9.56979	3.87134	47.3729	22.5231	59.9914	10.9695	43.2958
1783	ENSMUSG00000020167	Tcf3	21423	transcription factor 3 [Source:MGI Symbol;Acc:MGI:98510]	105.092	-1.06178	0.31142	-3.40949	0.00065084	0.00438019	66.1892	84.9319	52.9083	140.54	122.712	163.268	68.0098	142.173
1809	ENSMUSG00000020230	Prmt2	15468	protein arginine N-methyltransferase 2 [Source:MGI Symbol;Acc:MGI:1316652]	2.96198	-4.67548	1.80049	-2.59677	0.00941036	0.0372938	0	0	0	7.10594	1.55332	9.11262	0	5.92396
1815	ENSMUSG00000020246	Hcfc2	67933	host cell factor C2 [Source:MGI Symbol;Acc:MGI:1915183]	158.328	-1.28564	0.269598	-4.76872	1.854e-06	3.13851e-05	92.1458	105.268	78.7173	247.129	236.105	190.606	92.0436	224.613
1821	ENSMUSG00000020258	Glyctk	235582	glycerate kinase [Source:MGI Symbol;Acc:MGI:2444085]	532.41	-3.05053	0.489946	-6.22624	4.7775e-10	1.99215e-08	54.5088	229.675	59.3606	987.726	1043.05	820.136	114.515	950.305
1823	ENSMUSG00000020261	Slc36a1	215335	solute carrier family 36 (proton/amino acid symporter), member 1 [Source:MGI Symbol;Acc:MGI:2445299]	200.975	-1.97003	0.34632	-5.68846	1.28193e-08	3.95098e-07	62.2957	124.407	58.0701	296.87	295.907	368.302	81.591	320.36
1846	ENSMUSG00000020309	Chac2	68044	ChaC, cation transport regulator 2 [Source:MGI Symbol;Acc:MGI:1915294]	239.508	-2.74726	0.457773	-6.00136	1.95677e-09	7.15927e-08	31.1479	117.23	37.423	457.938	432.599	360.708	61.9336	417.082
1858	ENSMUSG00000020346	Mgat1	17308	mannoside acetylglucosaminyltransferase 1 [Source:MGI Symbol;Acc:MGI:96973]	334.39	-1.0901	0.245792	-4.43504	9.20539e-06	0.000123803	172.611	264.365	203.891	462.676	472.986	429.812	213.622	455.158
1866	ENSMUSG00000020364	Zfp354a	21408	zinc finger protein 354A [Source:MGI Symbol;Acc:MGI:103172]	42.9282	-1.58384	0.396755	-3.99198	6.55237e-05	0.000654199	19.4674	17.9433	27.0994	62.3744	71.4527	59.232	21.5034	64.353
1872	ENSMUSG00000020380	Rad50	19360	RAD50 double strand break repair protein [Source:MGI Symbol;Acc:MGI:109292]	110.795	-1.97403	0.311101	-6.34531	2.21974e-10	9.91192e-09	57.1044	44.2603	33.5516	161.858	191.058	176.937	44.9721	176.618
1891	ENSMUSG00000020420	Zfp607a	545938	zinc finger protein 607A [Source:MGI Symbol;Acc:MGI:3584526]	19.0925	-2.10053	0.644096	-3.2612	0.0011094	0.00680889	11.6805	2.39245	7.74268	26.8447	26.4064	39.488	7.27186	30.913
1892	ENSMUSG00000020422	Tns3	319939	tensin 3 [Source:MGI Symbol;Acc:MGI:2443012]	497.951	-1.27205	0.202156	-6.2924	3.12585e-10	1.36202e-08	314.074	266.758	294.222	752.44	655.501	704.709	291.685	704.217
1914	ENSMUSG00000020459	Mtif2	76784	mitochondrial translational initiation factor 2 [Source:MGI Symbol;Acc:MGI:1924034]	365.231	-1.39107	0.399753	-3.47982	0.000501747	0.00354347	132.378	346.905	125.173	592.951	509.489	484.488	201.486	528.976
1936	ENSMUSG00000020513	Tubd1	56427	tubulin, delta 1 [Source:MGI Symbol;Acc:MGI:1891826]	32.7632	-2.48729	0.574306	-4.33095	1.48468e-05	0.000186397	3.89348	19.1396	6.45224	48.1625	55.1428	63.7884	9.82843	55.6979
1938	ENSMUSG00000020515	Cnot8	69125	CCR4-NOT transcription complex, subunit 8 [Source:MGI Symbol;Acc:MGI:1916375]	346.412	-1.03292	0.246013	-4.19862	2.68541e-05	0.000309951	206.355	285.897	189.696	487.152	461.336	448.037	227.316	465.508
1951	ENSMUSG00000020534	Shmt1	20425	serine hydroxymethyltransferase 1 (soluble) [Source:MGI Symbol;Acc:MGI:98299]	1786.64	-1.57095	0.357654	-4.39236	1.12127e-05	0.000146626	664.488	1464.18	570.378	2553.4	2688.8	2778.59	899.681	2673.6
1957	ENSMUSG00000020546	Stxbp4	20913	syntaxin binding protein 4 [Source:MGI Symbol;Acc:MGI:1342296]	28.9756	-2.27147	0.568472	-3.99575	6.44903e-05	0.000646156	7.78697	17.9433	3.87134	46.5834	55.1428	42.5256	9.86722	48.0839
2005	ENSMUSG00000020652	Cenpo	52504	centromere protein O [Source:MGI Symbol;Acc:MGI:1923800]	21.7232	-1.79472	0.59375	-3.02269	0.00250537	0.0130588	10.3826	5.98112	12.9045	27.6342	24.0765	49.36	9.75607	33.6902
2015	ENSMUSG00000020669	Sh3yl1	24057	Sh3 domain YSC-like 1 [Source:MGI Symbol;Acc:MGI:1346118]	51.4261	-2.74613	0.472826	-5.80791	6.32591e-09	2.11025e-07	9.0848	19.1396	11.614	66.3221	120.382	82.0136	13.2795	89.5727
2021	ENSMUSG00000020679	Hnf1b	21410	HNF1 homeobox B [Source:MGI Symbol;Acc:MGI:98505]	106.191	-1.92287	0.310549	-6.19185	5.94629e-10	2.40867e-08	40.2327	53.83	38.7134	144.487	167.758	192.124	44.2587	168.123
2031	ENSMUSG00000020697	Lig3	16882	ligase III, DNA, ATP-dependent [Source:MGI Symbol;Acc:MGI:109152]	241.259	-1.24269	0.231412	-5.37005	7.87128e-08	1.93797e-06	121.996	154.313	153.563	323.715	336.294	357.67	143.291	339.226
2037	ENSMUSG00000020707	Rnf135	71956	ring finger protein 135 [Source:MGI Symbol;Acc:MGI:1919206]	32.7408	-2.5339	0.492725	-5.14262	2.70938e-07	5.80538e-06	7.78697	10.766	10.3236	52.8998	68.3461	46.3225	9.62552	55.8561
2043	ENSMUSG00000020718	Polg2	50776	polymerase (DNA directed), gamma 2, accessory subunit [Source:MGI Symbol;Acc:MGI:1354947]	54.8075	-1.81105	0.384583	-4.70913	2.48774e-06	3.98156e-05	15.5739	26.3169	30.9707	90.7981	86.2092	78.9761	24.2872	85.3278
2055	ENSMUSG00000020744	Slc25a19	67283	solute carrier family 25 (mitochondrial thiamine pyrophosphate carrier), member 19 [Source:MGI Symbol;Acc:MGI:1914533]	36.0678	-2.02614	0.491688	-4.12078	3.7759e-05	0.000412849	18.1696	17.9433	6.45224	57.6371	69.1227	47.0819	14.1884	57.9472
2058	ENSMUSG00000020752	Recql5	170472	RecQ protein-like 5 [Source:MGI Symbol;Acc:MGI:2156841]	102.747	-1.09973	0.280567	-3.91967	8.86699e-05	0.000839011	63.5936	71.7734	60.651	143.698	152.225	124.539	65.3393	140.154
2082	ENSMUSG00000020807	4933427D14Rik	74477	RIKEN cDNA 4933427D14 gene [Source:MGI Symbol;Acc:MGI:1921727]	40.2977	-1.53998	0.445575	-3.45616	0.00054793	0.00380643	23.3609	17.9433	20.6472	47.3729	48.9296	83.5324	20.6505	59.945
2087	ENSMUSG00000020818	Mfsd11	69900	major facilitator superfamily domain containing 11 [Source:MGI Symbol;Acc:MGI:1917150]	93.8556	-1.59105	0.326376	-4.87488	1.08872e-06	1.96629e-05	40.2327	58.6149	41.2943	116.853	141.352	164.787	46.714	140.997
2117	ENSMUSG00000020883	Fbxl20	72194	F-box and leucine-rich repeat protein 20 [Source:MGI Symbol;Acc:MGI:1919444]	438.967	-1.35877	0.224297	-6.05792	1.37897e-09	5.21343e-08	211.546	234.46	292.932	629.271	601.135	664.462	246.312	631.622
2135	ENSMUSG00000020918	Kat2a	14534	K(lysine) acetyltransferase 2A [Source:MGI Symbol;Acc:MGI:1343101]	137.599	-1.06473	0.254035	-4.19129	2.77367e-05	0.000318196	85.6566	89.7167	91.6218	206.862	177.078	174.659	88.9984	186.2
2147	ENSMUSG00000020948	Klhl28	66689	kelch-like 28 [Source:MGI Symbol;Acc:MGI:1913939]	105.131	-1.93929	0.320449	-6.05179	1.43244e-09	5.37973e-08	58.4023	32.298	40.0039	168.174	173.195	158.712	43.5681	166.694
2154	ENSMUSG00000020962	Gtf2a1	83602	general transcription factor II A, 1 [Source:MGI Symbol;Acc:MGI:1933277]	252.597	-1.3473	0.298031	-4.52067	6.16431e-06	8.76868e-05	98.6349	185.415	143.24	353.718	318.43	416.143	142.43	362.764
2155	ENSMUSG00000020964	Sel1l	20338	sel-1 suppressor of lin-12-like (C. elegans) [Source:MGI Symbol;Acc:MGI:1329016]	1447.4	-1.29037	0.41075	-3.1415	0.00168082	0.00954466	403.624	1443.84	672.323	2070.2	1868.64	2225.76	839.93	2054.87
2161	ENSMUSG00000020988	L2hgdh	217666	L-2-hydroxyglutarate dehydrogenase [Source:MGI Symbol;Acc:MGI:2384968]	550.012	-1.09772	0.329664	-3.32981	0.000869042	0.00554993	233.609	523.946	292.932	830.606	771.223	647.756	350.162	749.861
2185	ENSMUSG00000021051	Ppp2r5e	26932	protein phosphatase 2, regulatory subunit B', epsilon [Source:MGI Symbol;Acc:MGI:1349473]	653.796	-1.26455	0.310807	-4.0686	4.72962e-05	0.000500093	420.496	502.414	229.7	1020.89	872.189	877.09	384.203	923.389
2189	ENSMUSG00000021065	Fut8	53618	fucosyltransferase 8 [Source:MGI Symbol;Acc:MGI:1858901]	48.3658	-1.30971	0.437086	-2.99646	0.00273132	0.0139837	15.5739	43.064	24.5185	68.6908	74.5593	63.7884	27.7188	69.0128
2196	ENSMUSG00000021079	Timm9	30056	translocase of inner mitochondrial membrane 9 [Source:MGI Symbol;Acc:MGI:1353436]	258.948	-1.15188	0.361326	-3.18793	0.00143296	0.00836328	103.826	143.547	234.861	431.094	384.447	255.913	160.745	357.151
2206	ENSMUSG00000021111	Papola	18789	poly (A) polymerase alpha [Source:MGI Symbol;Acc:MGI:109301]	1280.18	-1.11996	0.208142	-5.38077	7.41671e-08	1.8414e-06	912.373	808.647	699.422	1779.64	1910.58	1570.41	806.814	1753.55
2213	ENSMUSG00000021120	Pigh	110417	phosphatidylinositol glycan anchor biosynthesis, class H [Source:MGI Symbol;Acc:MGI:99463]	29.0754	-2.35948	0.614602	-3.83904	0.000123518	0.00111244	3.89348	19.1396	5.16179	48.952	38.833	58.4727	9.39828	48.7526
2224	ENSMUSG00000021143	Pacs2	217893	phosphofurin acidic cluster sorting protein 2 [Source:MGI Symbol;Acc:MGI:1924399]	157.565	-1.33209	0.274047	-4.8608	1.16912e-06	2.08493e-05	103.826	83.7356	81.2982	225.021	190.282	261.229	89.62	225.511
2233	ENSMUSG00000021180	Rps6ka5	73086	ribosomal protein S6 kinase, polypeptide 5 [Source:MGI Symbol;Acc:MGI:1920336]	30.7212	-1.36313	0.457846	-2.97727	0.00290831	0.0147026	11.6805	17.9433	21.9376	51.3207	42.7163	38.7286	17.1871	44.2552
2235	ENSMUSG00000021185	Dglucy	217830	D-glutamate cyclase [Source:MGI Symbol;Acc:MGI:2444813]	252.615	-1.07487	0.254301	-4.22679	2.37052e-05	0.00027852	134.974	191.396	161.306	292.923	375.903	359.189	162.559	342.672
2244	ENSMUSG00000021200	Asb2	65256	ankyrin repeat and SOCS box-containing 2 [Source:MGI Symbol;Acc:MGI:1929743]	8.34421	-2.22134	0.893065	-2.48733	0.0128707	0.047633	1.29783	2.39245	5.16179	18.9492	10.8732	11.3908	2.95069	13.7377
2245	ENSMUSG00000021203	Otub2	68149	OTU domain, ubiquitin aldehyde binding 2 [Source:MGI Symbol;Acc:MGI:1915399]	16.7615	-1.57004	0.633581	-2.47805	0.0132103	0.0486325	11.6805	5.98112	7.74268	30.7924	14.7565	29.616	8.46808	25.055
2255	ENSMUSG00000021222	Dcaf4	73828	DDB1 and CUL4 associated factor 4 [Source:MGI Symbol;Acc:MGI:1921078]	33.7171	-1.70799	0.478014	-3.5731	0.000352783	0.00262665	9.0848	23.9245	14.1949	57.6371	45.8229	51.6382	15.7347	51.6994
2259	ENSMUSG00000021228	Acot3	171281	acyl-CoA thioesterase 3 [Source:MGI Symbol;Acc:MGI:2159619]	40.7214	-2.71368	0.893587	-3.03684	0.00239076	0.0125691	0	16.7471	15.4854	71.849	125.819	14.4283	10.7442	70.6987
2260	ENSMUSG00000021234	Fam161b	217705	family with sequence similarity 161, member B [Source:MGI Symbol;Acc:MGI:2443027]	6.78991	-4.86404	1.41338	-3.44141	0.000578686	0.00397785	0	0	1.29045	10.2641	14.7565	14.4283	0.430149	13.1497
2269	ENSMUSG00000021245	Mlh3	217716	mutL homolog 3 [Source:MGI Symbol;Acc:MGI:1353455]	128.825	-1.67144	0.43721	-3.82298	0.000131851	0.00117015	46.7218	104.071	33.5516	151.593	187.175	249.838	61.4483	196.202
2272	ENSMUSG00000021252	Erg28	58520	ergosterol biosynthesis 28 [Source:MGI Symbol;Acc:MGI:1915571]	478.644	-1.00413	0.387818	-2.58917	0.00962064	0.037967	201.163	537.104	216.795	558.211	650.841	707.747	318.354	638.933
2295	ENSMUSG00000021286	Zfyve21	68520	zinc finger, FYVE domain containing 21 [Source:MGI Symbol;Acc:MGI:1915770]	154.231	-1.59942	0.479203	-3.33766	0.000844856	0.00543012	28.5522	138.762	61.9415	251.077	207.368	237.688	76.4185	232.044
2302	ENSMUSG00000021311	Mtr	238505	5-methyltetrahydrofolate-homocysteine methyltransferase [Source:MGI Symbol;Acc:MGI:894292]	106.904	-1.33405	0.295752	-4.5107	6.4614e-06	9.1454e-05	48.0196	68.1847	65.8128	172.911	146.012	140.486	60.6724	153.137
2305	ENSMUSG00000021327	Zkscan3	72739	zinc finger with KRAB and SCAN domains 3 [Source:MGI Symbol;Acc:MGI:1919989]	505.993	-1.30635	0.256953	-5.084	3.69567e-07	7.589e-06	238.8	254.796	380.682	740.597	660.937	760.145	291.426	720.56
2320	ENSMUSG00000021375	Kif13a	16553	kinesin family member 13A [Source:MGI Symbol;Acc:MGI:1098264]	231.676	-1.19786	0.304046	-3.93973	8.15718e-05	0.000784944	115.507	192.592	113.559	290.554	294.354	383.49	140.553	322.799
2346	ENSMUSG00000021466	Ptch1	19206	patched 1 [Source:MGI Symbol;Acc:MGI:105373]	277.425	-1.52164	0.239835	-6.3445	2.23142e-10	9.938e-09	128.485	136.369	165.177	430.304	445.026	359.189	143.344	411.506
2370	ENSMUSG00000021510	Zfp729a	212281	zinc finger protein 729a [Source:MGI Symbol;Acc:MGI:3036250]	144.129	-1.53592	0.284311	-5.40224	6.58147e-08	1.66623e-06	81.7632	53.83	86.46	219.495	215.911	207.312	74.0177	214.239
2389	ENSMUSG00000021573	Tppp	72948	tubulin polymerization promoting protein [Source:MGI Symbol;Acc:MGI:1920198]	144.272	-2.80158	0.349005	-8.02733	9.96135e-16	1.04613e-13	24.6587	53.83	29.6803	240.023	286.587	230.853	36.0564	252.488
2401	ENSMUSG00000021597	Slf1	105377	SMC5-SMC6 complex localization factor 1 [Source:MGI Symbol;Acc:MGI:2145448]	44.4075	-1.03498	0.417776	-2.47734	0.0132364	0.0487006	28.5522	21.532	37.423	47.3729	76.8893	54.6757	29.1691	59.646
2406	ENSMUSG00000021611	Tert	21752	telomerase reverse transcriptase [Source:MGI Symbol;Acc:MGI:1202709]	37.0205	-3.66648	0.621789	-5.89667	3.70914e-09	1.31193e-07	1.29783	9.56979	5.16179	55.2684	55.1428	95.6825	5.34313	68.6979
2416	ENSMUSG00000021636	Marveld2	218518	MARVEL (membrane-associating) domain containing 2 [Source:MGI Symbol;Acc:MGI:2446166]	122.541	-1.67135	0.309732	-5.39614	6.80911e-08	1.70609e-06	76.5718	50.2414	49.037	159.489	191.835	208.072	58.6167	186.465
2417	ENSMUSG00000021638	Ocln	18260	occludin [Source:MGI Symbol;Acc:MGI:106183]	240.305	-2.2112	0.325508	-6.79308	1.09765e-11	6.20408e-10	119.4	82.5394	54.1988	333.979	429.493	422.218	85.3795	395.23
2418	ENSMUSG00000021639	Gtf2h2	23894	general transcription factor II H, polypeptide 2 [Source:MGI Symbol;Acc:MGI:1345669]	96.4981	-1.00441	0.312821	-3.2108	0.00132366	0.00783557	50.6153	84.9319	56.7797	126.328	130.479	129.855	64.1089	128.887
2422	ENSMUSG00000021650	Ptcd2	68927	pentatricopeptide repeat domain 2 [Source:MGI Symbol;Acc:MGI:1916177]	236.099	-1.10617	0.264475	-4.18252	2.88292e-05	0.000329733	136.272	191.396	121.302	321.346	343.284	302.995	149.657	322.542
2424	ENSMUSG00000021661	Ankra2	68558	ankyrin repeat, family A (RFXANK-like), 2 [Source:MGI Symbol;Acc:MGI:1915808]	87.7478	-1.50844	0.368983	-4.08811	4.34907e-05	0.00046623	37.637	31.1018	68.3937	120.011	125.819	143.524	45.7108	129.785
2445	ENSMUSG00000021704	Mtx3	382793	metaxin 3 [Source:MGI Symbol;Acc:MGI:2686040]	292.656	-1.05673	0.325913	-3.24235	0.00118548	0.00716216	115.507	210.535	243.895	472.15	376.68	337.167	189.979	395.332
2457	ENSMUSG00000021719	Rgs7bp	52882	regulator of G-protein signalling 7 binding protein [Source:MGI Symbol;Acc:MGI:106334]	18.0105	-1.83073	0.62506	-2.92888	0.00340182	0.0166403	2.59566	11.9622	9.03313	30.0029	24.8531	29.616	7.86367	28.1573
2478	ENSMUSG00000021770	Samd8	67630	sterile alpha motif domain containing 8 [Source:MGI Symbol;Acc:MGI:1914880]	575.816	-1.35737	0.32903	-4.12538	3.70123e-05	0.000406252	231.013	488.059	250.347	825.079	938.982	721.416	323.14	828.492
2506	ENSMUSG00000021824	Ap3m1	55946	adaptor-related protein complex 3, mu 1 subunit [Source:MGI Symbol;Acc:MGI:1929212]	1501.54	-1.61561	0.394802	-4.09221	4.27273e-05	0.000459367	403.624	1235.7	576.83	2682.1	2272.51	1838.47	738.718	2264.36
2524	ENSMUSG00000021892	Sh3bp5	24056	SH3-domain binding protein 5 (BTK-associated) [Source:MGI Symbol;Acc:MGI:1344391]	409.881	-1.17659	0.334931	-3.51292	0.000443211	0.00318024	172.611	386.38	194.858	534.525	577.835	593.08	251.283	568.48
2529	ENSMUSG00000021902	Phf7	71838	PHD finger protein 7 [Source:MGI Symbol;Acc:MGI:1919088]	72.6908	-1.41744	0.372629	-3.80389	0.000142443	0.00123958	37.637	53.83	27.0994	128.697	93.1992	95.6825	39.5221	105.859
2532	ENSMUSG00000021906	Oxnad1	218885	oxidoreductase NAD-binding domain containing 1 [Source:MGI Symbol;Acc:MGI:1916953]	211.926	-1.00972	0.297684	-3.39193	0.000694024	0.00462312	102.528	192.592	126.464	289.765	263.288	296.92	140.528	283.324
2536	ENSMUSG00000021916	Glt8d1	76485	glycosyltransferase 8 domain containing 1 [Source:MGI Symbol;Acc:MGI:1923735]	69.499	-1.43368	0.386833	-3.7062	0.000210395	0.00169965	23.3609	47.8489	41.2943	82.9027	95.5291	126.058	37.5014	101.497
2538	ENSMUSG00000021918	Nek4	23955	NIMA (never in mitosis gene a)-related expressed kinase 4 [Source:MGI Symbol;Acc:MGI:1344404]	123.65	-1.76388	0.416998	-4.22994	2.33756e-05	0.000275408	27.2544	92.1092	49.037	171.332	191.058	211.109	56.1335	191.167
2568	ENSMUSG00000021986	Amer2	72125	APC membrane recruitment 2 [Source:MGI Symbol;Acc:MGI:1919375]	11.3538	-2.52085	0.814362	-3.09549	0.00196488	0.0108047	1.29783	2.39245	6.45224	14.2119	21.7465	22.0222	3.38084	19.3268
2570	ENSMUSG00000021990	Spata13	219140	spermatogenesis associated 13 [Source:MGI Symbol;Acc:MGI:104838]	460.558	-1.08649	0.378978	-2.8669	0.00414518	0.0193741	454.24	251.207	179.372	468.992	585.601	823.933	294.94	626.176
2572	ENSMUSG00000021994	Wnt5a	22418	wingless-type MMTV integration site family, member 5A [Source:MGI Symbol;Acc:MGI:98958]	35.7745	-1.0972	0.425906	-2.57615	0.0099907	0.0391333	24.6587	16.7471	27.0994	41.8461	45.8229	58.4727	22.8351	48.7139
2588	ENSMUSG00000022022	Mtrf1	211253	mitochondrial translational release factor 1 [Source:MGI Symbol;Acc:MGI:2384815]	75.4818	-1.25752	0.387924	-3.24166	0.00118838	0.00717559	44.1261	63.3998	25.8089	98.6936	97.0825	123.78	44.445	106.519
2591	ENSMUSG00000022025	Cnmd	16840	chondromodulin [Source:MGI Symbol;Acc:MGI:1341171]	23.8964	-1.90638	0.664056	-2.87082	0.00409408	0.0191795	6.48914	10.766	12.9045	68.6908	21.7465	22.7816	10.0532	37.7396
2604	ENSMUSG00000022057	Adamdec1	58860	ADAM-like, decysin 1 [Source:MGI Symbol;Acc:MGI:1917650]	17.532	-1.86674	0.699293	-2.66947	0.00759715	0.0315245	6.48914	8.37356	7.74268	30.7924	41.163	10.6314	7.53513	27.5289
2608	ENSMUSG00000022075	Rhobtb2	246710	Rho-related BTB domain containing 2 [Source:MGI Symbol;Acc:MGI:2180557]	63.1911	-1.81354	0.40439	-4.48463	7.30417e-06	0.000101732	31.1479	35.8867	16.7758	121.591	95.5291	78.2167	27.9368	98.4455
2619	ENSMUSG00000022103	Gfra2	14586	glial cell line derived neurotrophic factor family receptor alpha 2 [Source:MGI Symbol;Acc:MGI:1195462]	4.9295	-5.40937	1.5653	-3.4558	0.000548658	0.00380993	0	0	0	10.2641	14.7565	4.55631	0	9.85899
2650	ENSMUSG00000022179	4931414P19Rik	74359	RIKEN cDNA 4931414P19 gene [Source:MGI Symbol;Acc:MGI:1921609]	21.7725	-1.52382	0.552504	-2.75803	0.00581508	0.0253875	6.48914	16.7471	10.3236	35.5297	35.7263	25.8191	11.1866	32.3584
2658	ENSMUSG00000022194	Pabpn1	54196	poly(A) binding protein, nuclear 1 [Source:MGI Symbol;Acc:MGI:1859158]	134.778	-1.66811	0.292576	-5.70144	1.18796e-08	3.68139e-07	83.061	52.6338	58.0701	202.914	222.901	189.087	64.5883	204.967
2659	ENSMUSG00000022195	6030458C11Rik	77877	RIKEN cDNA 6030458C11 gene [Source:MGI Symbol;Acc:MGI:1925127]	185.127	-1.25416	0.392221	-3.19758	0.00138587	0.00813351	54.5088	167.471	105.817	237.654	242.318	302.995	109.266	260.989
2687	ENSMUSG00000022248	Rad1	19355	RAD1 checkpoint DNA exonuclease [Source:MGI Symbol;Acc:MGI:1316678]	28.5793	-1.59398	0.518257	-3.07565	0.00210046	0.0113998	6.48914	16.7471	19.3567	45.0043	49.7062	34.1723	14.1977	42.961
2693	ENSMUSG00000022265	Ank	11732	progressive ankylosis [Source:MGI Symbol;Acc:MGI:3045421]	283.421	-1.05588	0.359923	-2.93363	0.00335019	0.0164351	159.633	226.086	166.468	271.605	291.247	585.486	184.062	382.779
2704	ENSMUSG00000022303	Dcstamp	75766	dendrocyte expressed seven transmembrane protein [Source:MGI Symbol;Acc:MGI:1923016]	13.6742	-3.5906	0.847069	-4.23885	2.24664e-05	0.000266541	1.29783	2.39245	2.58089	20.5283	25.6298	29.616	2.09039	25.258
2729	ENSMUSG00000022359	Wdyhv1	76773	WDYHV motif containing 1 [Source:MGI Symbol;Acc:MGI:1924023]	29.7221	-1.21857	0.4927	-2.47325	0.0133891	0.0491665	15.5739	27.5131	10.3236	43.4252	45.0463	36.4505	17.8035	41.6407
2730	ENSMUSG00000022360	Atad2	70472	ATPase family, AAA domain containing 2 [Source:MGI Symbol;Acc:MGI:1917722]	43.6271	-1.24581	0.395954	-3.14635	0.00165324	0.0094132	20.7652	33.4943	23.2281	52.8998	68.3461	63.029	25.8292	61.4249
2731	ENSMUSG00000022361	Zhx1	22770	zinc fingers and homeoboxes 1 [Source:MGI Symbol;Acc:MGI:109271]	457.852	-1.52122	0.264671	-5.7476	9.05204e-09	2.88935e-07	171.313	277.524	260.67	756.388	688.897	592.32	236.502	679.202
2732	ENSMUSG00000022364	Tbc1d31	210544	TBC1 domain family, member 31 [Source:MGI Symbol;Acc:MGI:2684931]	36.8006	-1.86202	0.456216	-4.08146	4.47545e-05	0.000477672	16.8718	20.3358	10.3236	45.0043	65.2394	63.029	15.8437	57.7576
2740	ENSMUSG00000022383	Ppara	19013	peroxisome proliferator activated receptor alpha [Source:MGI Symbol;Acc:MGI:104740]	1254.16	-3.13075	0.570107	-5.49152	3.985e-08	1.06767e-06	132.378	563.421	74.8459	2393.91	2288.04	2072.36	256.882	2251.44
2745	ENSMUSG00000022389	Tef	21685	thyrotroph embryonic factor [Source:MGI Symbol;Acc:MGI:98663]	1252.53	-1.92307	0.294859	-6.522	6.93752e-11	3.38189e-09	321.861	612.466	633.61	1974.66	2160.67	1811.89	522.646	1982.41
2758	ENSMUSG00000022419	Deptor	97998	DEP domain containing MTOR-interacting protein [Source:MGI Symbol;Acc:MGI:2146322]	2419.82	-1.24561	0.391087	-3.185	0.00144755	0.00841665	737.166	2361.34	1207.86	2825.8	3731.85	3654.92	1435.46	3404.19
2764	ENSMUSG00000022428	Cby1	73739	chibby family member 1, beta catenin antagonist [Source:MGI Symbol;Acc:MGI:1920989]	31.7704	-1.59434	0.480145	-3.32053	0.000898454	0.00570035	14.2761	23.9245	9.03313	49.7416	45.0463	48.6007	15.7446	47.7962
2793	ENSMUSG00000022494	Shisa9	72555	shisa family member 9 [Source:MGI Symbol;Acc:MGI:1919805]	8.42847	-2.24995	0.898138	-2.50513	0.0122408	0.0457669	1.29783	3.58867	3.87134	16.5805	7.7666	17.4659	2.91928	13.9377
2831	ENSMUSG00000022560	Slc52a2	52710	solute carrier protein 52, member 2 [Source:MGI Symbol;Acc:MGI:1289288]	49.6134	-1.51645	0.456052	-3.32517	0.000883661	0.00562639	22.0631	41.8678	12.9045	75.0072	69.8994	75.9385	25.6118	73.615
2838	ENSMUSG00000022571	Pycrl	66194	pyrroline-5-carboxylate reductase-like [Source:MGI Symbol;Acc:MGI:1913444]	98.3735	-2.36508	0.444235	-5.32394	1.01542e-07	2.44002e-06	12.9783	47.8489	34.8421	165.805	202.708	126.058	31.8898	164.857
2846	ENSMUSG00000022604	Cep97	74201	centrosomal protein 97 [Source:MGI Symbol;Acc:MGI:1921451]	44.447	-1.93713	0.404655	-4.78712	1.6919e-06	2.89872e-05	19.4674	22.7282	12.9045	67.9012	75.336	68.3447	18.3667	70.5273
2853	ENSMUSG00000022621	Rabl2	68708	RAB, member RAS oncogene family-like 2 [Source:MGI Symbol;Acc:MGI:1915958]	14.6346	-2.77573	0.839109	-3.30795	0.00093982	0.0059263	3.89348	7.17734	0	18.1596	38.833	19.744	3.69027	25.5789
2863	ENSMUSG00000022656	Nectin3	58998	nectin cell adhesion molecule 3 [Source:MGI Symbol;Acc:MGI:1930171]	419.558	-1.16343	0.278809	-4.17285	3.00819e-05	0.000341189	225.822	330.158	220.666	569.265	703.654	467.781	258.882	580.233
2866	ENSMUSG00000022664	Slc35a5	74102	solute carrier family 35, member A5 [Source:MGI Symbol;Acc:MGI:1921352]	110.006	-2.21437	0.293693	-7.53974	4.70906e-14	3.77902e-12	36.3392	41.8678	38.7134	200.545	174.748	167.824	38.9735	181.039
2876	ENSMUSG00000022678	Nde1	67203	nudE neurodevelopment protein 1 [Source:MGI Symbol;Acc:MGI:1914453]	107.899	-1.80228	0.390848	-4.6112	4.00354e-06	6.01167e-05	38.9348	76.5583	28.3898	175.28	178.632	149.599	47.961	167.837
2885	ENSMUSG00000022701	Ccdc191	212153	coiled-coil domain containing 191 [Source:MGI Symbol;Acc:MGI:1922661]	66.6075	-1.25179	0.324358	-3.85929	0.000113718	0.00103828	33.7435	43.064	41.2943	103.431	86.9859	91.1262	39.3673	93.8477
2893	ENSMUSG00000022718	Dgcr8	94223	DGCR8, microprocessor complex subunit [Source:MGI Symbol;Acc:MGI:2151114]	88.3476	-1.79963	0.301492	-5.96908	2.38594e-09	8.65502e-08	37.637	41.8678	38.7134	140.54	146.789	124.539	39.4061	137.289
2898	ENSMUSG00000022742	Cpox	12892	coproporphyrinogen oxidase [Source:MGI Symbol;Acc:MGI:104841]	1892.79	-1.20743	0.361017	-3.34452	0.000824253	0.00531981	826.716	1696.24	908.475	3667.46	2389.78	1868.09	1143.81	2641.78
2910	ENSMUSG00000022761	Lztr1	66863	leucine-zipper-like transcriptional regulator, 1 [Source:MGI Symbol;Acc:MGI:1914113]	240.465	-1.18945	0.285655	-4.16395	3.12795e-05	0.00035219	107.72	196.181	135.497	354.508	323.867	325.017	146.466	334.464
2913	ENSMUSG00000022765	Snap29	67474	synaptosomal-associated protein 29 [Source:MGI Symbol;Acc:MGI:1914724]	307.751	-1.01132	0.289023	-3.49909	0.000466843	0.00332597	201.163	168.667	242.604	420.83	509.489	303.754	204.145	411.358
2920	ENSMUSG00000022774	Ncbp2	68092	nuclear cap binding protein subunit 2 [Source:MGI Symbol;Acc:MGI:1915342]	166.439	-1.41378	0.265112	-5.33276	9.6732e-08	2.33764e-06	73.9762	102.875	95.4931	228.18	271.054	227.056	90.7815	242.097
2924	ENSMUSG00000022788	Fgd4	224014	FYVE, RhoGEF and PH domain containing 4 [Source:MGI Symbol;Acc:MGI:2183747]	242.667	-1.64969	0.415283	-3.97245	7.1136e-05	0.000702809	98.6349	197.377	55.4892	350.56	403.863	350.077	117.167	368.166
2934	ENSMUSG00000022802	Lmln	239833	leishmanolysin-like (metallopeptidase M8 family) [Source:MGI Symbol;Acc:MGI:2444736]	21.7734	-2.57269	0.610625	-4.2132	2.51775e-05	0.000293789	5.19131	8.37356	5.16179	26.8447	34.9497	50.1194	6.24222	37.3046
2947	ENSMUSG00000022828	Gtf2e1	74197	general transcription factor II E, polypeptide 1 (alpha subunit) [Source:MGI Symbol;Acc:MGI:1921447]	145.117	-1.57227	0.287194	-5.4746	4.38495e-08	1.16201e-06	64.8914	74.1658	80.0077	266.868	194.165	190.606	73.0217	217.213
2955	ENSMUSG00000022844	Pdia5	72599	protein disulfide isomerase associated 5 [Source:MGI Symbol;Acc:MGI:1919849]	547.82	-1.68995	0.322774	-5.23569	1.64369e-07	3.74854e-06	247.885	355.278	174.21	628.481	890.829	990.238	259.125	836.516
2998	ENSMUSG00000022948	Setd4	224440	SET domain containing 4 [Source:MGI Symbol;Acc:MGI:2136890]	76.5225	-1.32108	0.489746	-2.69747	0.00698687	0.0295103	48.0196	22.7282	60.651	123.959	148.342	55.4351	43.7996	109.245
3008	ENSMUSG00000022967	Ifnar1	15975	interferon (alpha and beta) receptor 1 [Source:MGI Symbol;Acc:MGI:107658]	356.292	-1.20235	0.211522	-5.68427	1.3137e-08	4.0343e-07	208.95	233.264	205.181	538.472	494.732	457.15	215.798	496.785
3019	ENSMUSG00000022994	Adcy6	11512	adenylate cyclase 6 [Source:MGI Symbol;Acc:MGI:87917]	190.309	-1.1051	0.279273	-3.95707	7.58739e-05	0.000739737	121.996	145.939	94.2027	235.286	305.227	239.206	120.713	259.906
3028	ENSMUSG00000023017	Asic1	11419	acid-sensing (proton-gated) ion channel 1 [Source:MGI Symbol;Acc:MGI:1194915]	16.5607	-2.76871	0.75208	-3.68141	0.000231947	0.00184311	2.59566	1.19622	9.03313	21.3178	30.2897	34.9317	4.275	28.8464
3033	ENSMUSG00000023022	Lima1	65970	LIM domain and actin binding 1 [Source:MGI Symbol;Acc:MGI:1920992]	528.834	-1.92359	0.416183	-4.62199	3.80072e-06	5.7477e-05	132.378	393.557	135.497	934.037	798.406	779.129	220.478	837.191
3073	ENSMUSG00000023147	Wrb	71446	tryptophan rich basic protein [Source:MGI Symbol;Acc:MGI:2136882]	29.2394	-2.48537	0.595718	-4.17205	3.01869e-05	0.000341924	5.19131	5.98112	15.4854	36.3193	71.4527	41.0068	8.88593	49.5929
3082	ENSMUSG00000023206	Il15ra	16169	interleukin 15 receptor, alpha chain [Source:MGI Symbol;Acc:MGI:104644]	392.225	-1.55774	0.381219	-4.08621	4.38484e-05	0.000468589	90.848	282.309	223.247	527.419	618.221	611.305	198.801	585.648
3086	ENSMUSG00000023243	Kcnk5	16529	potassium channel, subfamily K, member 5 [Source:MGI Symbol;Acc:MGI:1336175]	367.768	-1.4369	0.360286	-3.98823	6.6568e-05	0.000663068	177.802	172.256	245.185	737.439	574.728	299.198	198.415	537.122
3090	ENSMUSG00000023266	Frs3	107971	fibroblast growth factor receptor substrate 3 [Source:MGI Symbol;Acc:MGI:2135965]	12.0479	-2.05543	0.749455	-2.74256	0.00609616	0.0263434	5.19131	1.19622	7.74268	19.7387	20.1932	18.2252	4.71007	19.3857
3117	ENSMUSG00000023764	Sfi1	78887	Sfi1 homolog, spindle assembly associated (yeast) [Source:MGI Symbol;Acc:MGI:1926137]	145.16	-1.54815	0.259932	-5.95598	2.58518e-09	9.33795e-08	79.1675	70.5772	72.265	216.336	194.165	238.447	74.0032	216.316
3123	ENSMUSG00000023809	Rps6ka2	20112	ribosomal protein S6 kinase, polypeptide 2 [Source:MGI Symbol;Acc:MGI:1342290]	18.4037	-1.69319	0.635341	-2.665	0.00769872	0.0318218	6.48914	15.5509	3.87134	32.3715	22.5231	29.616	8.63713	28.1702
3130	ENSMUSG00000023845	Lnpep	240028	leucyl/cystinyl aminopeptidase [Source:MGI Symbol;Acc:MGI:2387123]	633.25	-1.1182	0.259843	-4.30337	1.68217e-05	0.000207382	494.472	419.874	283.898	876.4	900.925	823.933	399.415	867.086
3142	ENSMUSG00000023912	Slc25a27	74011	solute carrier family 25, member 27 [Source:MGI Symbol;Acc:MGI:1921261]	20.0143	-2.30766	0.640922	-3.60053	0.000317573	0.00240235	3.89348	5.98112	10.3236	38.6879	20.1932	41.0068	6.73273	33.296
3145	ENSMUSG00000023919	Cenpq	83815	centromere protein Q [Source:MGI Symbol;Acc:MGI:1933744]	24.2304	-1.49695	0.532509	-2.81113	0.00493679	0.022243	11.6805	8.37356	18.0663	41.0566	40.3863	25.8191	12.7068	35.754
3147	ENSMUSG00000023923	Tbc1d5	72238	TBC1 domain family, member 5 [Source:MGI Symbol;Acc:MGI:1919488]	184.868	-1.13632	0.244085	-4.65541	3.23338e-06	4.97823e-05	106.422	127.996	112.269	242.392	236.881	283.251	115.562	254.174
3152	ENSMUSG00000023942	Slc29a1	63959	solute carrier family 29 (nucleoside transporters), member 1 [Source:MGI Symbol;Acc:MGI:1927073]	1030.59	-1.22686	0.356095	-3.44531	0.000570396	0.0039315	397.135	994.062	459.399	1481.98	1308.67	1542.31	616.865	1444.32
3157	ENSMUSG00000023953	Polh	80905	polymerase (DNA directed), eta (RAD 30 related) [Source:MGI Symbol;Acc:MGI:1891457]	39.4909	-1.82392	0.472899	-3.8569	0.000114836	0.00104588	27.2544	8.37356	16.7758	63.9535	61.3561	59.232	17.4679	61.5139
3160	ENSMUSG00000023961	Enpp4	224794	ectonucleotide pyrophosphatase/phosphodiesterase 4 [Source:MGI Symbol;Acc:MGI:2682634]	167.039	-1.78691	0.28714	-6.22315	4.8728e-10	2.02692e-08	90.848	81.3432	52.9083	272.394	261.734	243.003	75.0332	259.044
3169	ENSMUSG00000023977	Ubr2	224826	ubiquitin protein ligase E3 component n-recognin 2 [Source:MGI Symbol;Acc:MGI:1861099]	1291.48	-1.10655	0.327099	-3.38294	0.000717153	0.00475299	622.957	1258.43	575.54	1888.6	1664.38	1738.99	818.975	1763.99
3173	ENSMUSG00000023990	Tfeb	21425	transcription factor EB [Source:MGI Symbol;Acc:MGI:103270]	40.0321	-2.95964	0.574009	-5.15609	2.52166e-07	5.44428e-06	9.0848	16.7471	1.29045	67.1117	75.336	70.6228	9.04079	71.0235
3179	ENSMUSG00000024007	Ppil1	68816	peptidylprolyl isomerase (cyclophilin)-like 1 [Source:MGI Symbol;Acc:MGI:1916066]	33.087	-1.20858	0.446338	-2.70777	0.00677374	0.0287458	16.8718	28.7094	14.1949	46.5834	46.5996	45.5631	19.9253	46.2487
3196	ENSMUSG00000024045	Akap8	56399	A kinase (PRKA) anchor protein 8 [Source:MGI Symbol;Acc:MGI:1928488]	479.685	-1.21611	0.254817	-4.77248	1.81974e-06	3.08974e-05	336.137	214.124	316.16	693.224	724.624	593.839	288.807	670.562
3241	ENSMUSG00000024135	Srbd1	78586	S1 RNA binding domain 1 [Source:MGI Symbol;Acc:MGI:1925836]	146.266	-1.37954	0.427641	-3.22594	0.00125561	0.00751642	44.1261	142.351	56.7797	217.916	217.465	198.959	81.0855	211.446
3257	ENSMUSG00000024169	Ift140	106633	intraflagellar transport 140 [Source:MGI Symbol;Acc:MGI:2146906]	78.3988	-1.81106	0.432001	-4.19225	2.76197e-05	0.000317282	19.4674	57.4187	27.0994	131.065	99.4124	135.93	34.6618	122.136
3258	ENSMUSG00000024170	Telo2	71718	telomere maintenance 2 [Source:MGI Symbol;Acc:MGI:1918968]	44.6576	-1.28654	0.409208	-3.14397	0.00166671	0.00948035	31.1479	29.9056	16.7758	63.9535	73.006	53.157	25.9431	63.3722
3259	ENSMUSG00000024174	Pot1b	72836	protection of telomeres 1B [Source:MGI Symbol;Acc:MGI:1920086]	20.8109	-2.07331	0.545868	-3.79819	0.000145757	0.00126454	7.78697	7.17734	9.03313	36.3193	34.173	30.3754	7.99915	33.6226
3276	ENSMUSG00000024212	Mllt1	64144	myeloid/lymphoid or mixed-lineage leukemia; translocated to, 1 [Source:MGI Symbol;Acc:MGI:1927238]	128.454	-1.51285	0.341961	-4.42404	9.68715e-06	0.000129159	88.2523	72.9696	38.7134	193.44	201.932	175.418	66.6451	190.263
3283	ENSMUSG00000024228	Nudt12	67993	nudix (nucleoside diphosphate linked moiety X)-type motif 12 [Source:MGI Symbol;Acc:MGI:1915243]	610.067	-1.61189	0.372143	-4.33137	1.48182e-05	0.00018619	171.313	489.255	241.314	1004.31	889.275	864.94	300.627	919.507
3291	ENSMUSG00000024241	Sos1	20662	SOS Ras/Rac guanine nucleotide exchange factor 1 [Source:MGI Symbol;Acc:MGI:98354]	580.913	-1.27108	0.279612	-4.54588	5.47064e-06	7.9413e-05	255.672	461.742	303.255	900.876	733.167	830.767	340.223	821.603
3296	ENSMUSG00000024251	Thada	240174	thyroid adenoma associated [Source:MGI Symbol;Acc:MGI:3039623]	106.944	-1.31492	0.303558	-4.3317	1.47965e-05	0.00018619	51.9131	80.147	51.6179	155.541	146.012	156.433	61.226	152.662
3301	ENSMUSG00000024260	Sap130	269003	Sin3A associated protein [Source:MGI Symbol;Acc:MGI:1919782]	195.489	-1.48192	0.272501	-5.43824	5.38094e-08	1.39552e-06	112.911	94.5016	101.945	255.024	251.638	356.911	103.119	287.858
3307	ENSMUSG00000024276	Zfp397	69256	zinc finger protein 397 [Source:MGI Symbol;Acc:MGI:1916506]	238.71	-1.53449	0.417378	-3.67651	0.000236448	0.00187015	107.72	56.2225	203.891	324.505	388.33	351.595	122.611	354.81
3308	ENSMUSG00000024277	Mapre2	212307	microtubule-associated protein, RP/EB family, member 2 [Source:MGI Symbol;Acc:MGI:106271]	195.812	-1.60613	0.324299	-4.95262	7.32198e-07	1.38832e-05	75.274	139.958	74.8459	315.82	316.1	252.875	96.6927	294.932
3328	ENSMUSG00000024331	Dsc2	13506	desmocollin 2 [Source:MGI Symbol;Acc:MGI:103221]	676.612	-1.19818	0.234123	-5.11772	3.09243e-07	6.49525e-06	421.794	339.727	471.013	892.98	1092.76	841.399	410.845	942.38
3341	ENSMUSG00000024365	Cyp21a1	13079	cytochrome P450, family 21, subfamily a, polypeptide 1 [Source:MGI Symbol;Acc:MGI:88591]	15.3351	-2.20858	0.794956	-2.77824	0.0054654	0.0241138	7.78697	5.98112	2.58089	31.582	35.7263	8.35324	5.44966	25.2205
3361	ENSMUSG00000024411	Aqp4	11829	aquaporin 4 [Source:MGI Symbol;Acc:MGI:107387]	41.379	-2.1159	0.435193	-4.86198	1.1622e-06	2.07476e-05	10.3826	16.7471	19.3567	69.4803	76.1127	56.1945	15.4955	67.2625
3365	ENSMUSG00000024421	Lama3	16774	laminin, alpha 3 [Source:MGI Symbol;Acc:MGI:99909]	90.4171	-1.03049	0.350493	-2.94012	0.00328087	0.0161789	68.7849	69.3809	40.0039	135.013	135.915	93.4044	59.3899	121.444
3370	ENSMUSG00000024426	Atat1	73242	alpha tubulin acetyltransferase 1 [Source:MGI Symbol;Acc:MGI:1913869]	72.4949	-1.97263	0.370144	-5.32935	9.85627e-08	2.37514e-06	23.3609	26.3169	38.7134	112.116	93.9758	140.486	29.4637	115.526
3374	ENSMUSG00000024431	Nr3c1	14815	nuclear receptor subfamily 3, group C, member 1 [Source:MGI Symbol;Acc:MGI:95824]	1262.46	-1.11811	0.327303	-3.41613	0.000635174	0.00429329	715.103	1181.87	491.66	1689.64	1890.39	1606.1	796.211	1728.71
3376	ENSMUSG00000024437	Gm8615		predicted pseudogene 8615 [Source:MGI Symbol;Acc:MGI:3647532]	55.6971	-1.59091	0.434514	-3.66135	0.000250886	0.00196821	16.8718	45.4565	20.6472	86.8504	83.1026	81.2542	27.6585	83.7357
3383	ENSMUSG00000024457	Trim26	22670	tripartite motif-containing 26 [Source:MGI Symbol;Acc:MGI:1337056]	292.872	-1.09535	0.211284	-5.18424	2.16895e-07	4.76133e-06	193.376	192.592	174.21	405.039	374.35	417.662	186.726	399.017
3385	ENSMUSG00000024472	Dcp2	70640	decapping mRNA 2 [Source:MGI Symbol;Acc:MGI:1917890]	189.587	-1.159	0.258117	-4.4902	7.11553e-06	9.97993e-05	125.889	112.445	113.559	246.339	312.994	226.297	117.298	261.877
3436	ENSMUSG00000024592	C330018D20Rik	77422	RIKEN cDNA C330018D20 gene [Source:MGI Symbol;Acc:MGI:1924672]	110.486	-1.54658	0.410383	-3.76862	0.000164155	0.00138875	28.5522	69.3809	70.9746	202.125	114.946	176.937	56.3026	164.669
3447	ENSMUSG00000024621	Csf1r	12978	colony stimulating factor 1 receptor [Source:MGI Symbol;Acc:MGI:1339758]	328.199	-1.00854	0.302056	-3.33893	0.000841011	0.00541155	215.439	270.346	167.758	565.317	412.406	337.926	217.848	438.55
3453	ENSMUSG00000024645	Timm21	67105	translocase of inner mitochondrial membrane 21 [Source:MGI Symbol;Acc:MGI:1920595]	209.918	-1.15212	0.409992	-2.8101	0.00495268	0.0222969	85.6566	226.086	78.7173	298.45	286.587	284.01	130.153	289.682
3472	ENSMUSG00000024691	Fam111a	107373	family with sequence similarity 111, member A [Source:MGI Symbol;Acc:MGI:1915508]	24.7195	-1.36796	0.475296	-2.87812	0.00400048	0.0188428	12.9783	16.7471	11.614	36.3193	35.7263	34.9317	13.7798	35.6591
3473	ENSMUSG00000024694	Keg1	64697	kidney expressed gene 1 [Source:MGI Symbol;Acc:MGI:1928492]	1257.86	-2.37015	0.486501	-4.87183	1.10571e-06	1.99063e-05	214.142	776.349	232.281	2305.48	2707.44	1311.46	407.59	2108.13
3493	ENSMUSG00000024759	Atl3	109168	atlastin GTPase 3 [Source:MGI Symbol;Acc:MGI:1924270]	1582.42	-1.38578	0.292003	-4.74576	2.0773e-06	3.44791e-05	652.807	1227.33	747.169	2494.19	2445.7	1927.32	875.767	2289.07
3497	ENSMUSG00000024769	Cdc42bpg	240505	CDC42 binding protein kinase gamma (DMPK-like) [Source:MGI Symbol;Acc:MGI:2652845]	139.336	-1.28184	0.31943	-4.0129	5.99774e-05	0.00060774	77.8697	111.249	54.1988	191.86	199.602	201.237	81.1057	197.566
3509	ENSMUSG00000024790	Sac3d1	66406	SAC3 domain containing 1 [Source:MGI Symbol;Acc:MGI:1913656]	17.9256	-1.80998	0.593307	-3.05066	0.00228342	0.0121248	10.3826	9.56979	3.87134	30.0029	25.6298	28.0973	7.94125	27.91
3529	ENSMUSG00000024833	Pola2	18969	polymerase (DNA directed), alpha 2 [Source:MGI Symbol;Acc:MGI:99690]	52.394	-1.43857	0.359567	-4.00085	6.31162e-05	0.000635449	31.1479	22.7282	30.9707	82.9027	70.676	75.9385	28.2823	76.5057
3540	ENSMUSG00000024856	Cdk2ap2	52004	CDK2-associated protein 2 [Source:MGI Symbol;Acc:MGI:1098779]	143.678	-1.15185	0.314049	-3.66774	0.000244702	0.00192826	81.7632	118.426	67.1033	165.805	201.155	227.816	89.0975	198.259
3545	ENSMUSG00000024869	Nudt8		Nucleoside diphosphate-linked moiety X motif 8 [Source:UniProtKB/Swiss-Prot;Acc:Q9CR24]	7.04023	-2.87976	1.01158	-2.84678	0.00441632	0.0203177	1.29783	1.19622	2.58089	11.0537	13.2032	12.9095	1.69165	12.3888
3561	ENSMUSG00000024906	Mus81	71711	MUS81 structure-specific endonuclease subunit [Source:MGI Symbol;Acc:MGI:1918961]	43.7668	-1.34464	0.383383	-3.50731	0.000452669	0.00323311	27.2544	27.5131	19.3567	63.9535	67.5694	56.9539	24.7081	62.8256
3568	ENSMUSG00000024921	Smarca2	67155	SWI/SNF related, matrix associated, actin dependent regulator of chromatin, subfamily a, member 2 [Source:MGI Symbol;Acc:MGI:99603]	1343.45	-1.09327	0.351842	-3.10726	0.00188829	0.0104541	602.192	1369.68	600.058	2048.09	1840.68	1600.02	857.309	1829.6
3586	ENSMUSG00000024959	Bad	12015	BCL2-associated agonist of cell death [Source:MGI Symbol;Acc:MGI:1096330]	63.2421	-1.74794	0.621054	-2.81448	0.00488565	0.0220519	6.48914	62.2036	18.0663	87.64	103.296	101.758	28.9197	97.5644
3587	ENSMUSG00000024960	Plcb3	18797	phospholipase C, beta 3 [Source:MGI Symbol;Acc:MGI:104778]	160.167	-1.30291	0.377202	-3.45413	0.000552062	0.00382732	77.8697	144.743	54.1988	198.177	239.211	246.8	92.2705	228.063
3595	ENSMUSG00000024975	Pdcd4	18569	programmed cell death 4 [Source:MGI Symbol;Acc:MGI:107490]	763.728	-1.23532	0.350575	-3.52369	0.000425583	0.00306929	477.601	650.745	237.442	1050.1	1158.78	1007.7	455.263	1072.19
3614	ENSMUSG00000025006	Sorbs1	20411	sorbin and SH3 domain containing 1 [Source:MGI Symbol;Acc:MGI:700014]	336.994	-1.09022	0.210068	-5.18984	2.10472e-07	4.63939e-06	207.652	197.377	241.314	456.359	462.113	457.15	215.448	458.541
3643	ENSMUSG00000025077	Dclre1a	55947	DNA cross-link repair 1A [Source:MGI Symbol;Acc:MGI:1930042]	123.485	-1.51952	0.264172	-5.75199	8.81969e-09	2.82579e-07	70.0827	62.2036	59.3606	181.596	176.302	191.365	63.8823	183.088
3646	ENSMUSG00000025085	Ablim1	226251	actin-binding LIM protein 1 [Source:MGI Symbol;Acc:MGI:1194500]	530.104	-1.16256	0.231318	-5.02583	5.01252e-07	9.84734e-06	302.394	332.55	347.13	658.484	889.275	650.793	327.358	732.851
3671	ENSMUSG00000025154	Arhgap19	71085	Rho GTPase activating protein 19 [Source:MGI Symbol;Acc:MGI:1918335]	30.1661	-2.00904	0.620943	-3.23547	0.00121444	0.00729047	2.59566	20.3358	12.9045	63.1639	33.3964	48.6007	11.9453	48.387
3690	ENSMUSG00000025192	Entpd7	93685	ectonucleoside triphosphate diphosphohydrolase 7 [Source:MGI Symbol;Acc:MGI:2135885]	33.1501	-2.95285	0.543357	-5.43445	5.49657e-08	1.42334e-06	11.6805	5.98112	5.16179	52.8998	75.336	47.8413	7.60779	58.6923
3691	ENSMUSG00000025193	Cutc	66388	cutC copper transporter [Source:MGI Symbol;Acc:MGI:1913638]	99.2419	-1.26741	0.510022	-2.48502	0.0129545	0.0478809	16.8718	95.6979	61.9415	163.437	139.799	117.705	58.1704	140.313
3703	ENSMUSG00000025209	Twnk	226153	twinkle mtDNA helicase [Source:MGI Symbol;Acc:MGI:2137410]	226.014	-1.58626	0.334505	-4.74212	2.1149e-06	3.50349e-05	75.274	93.3054	170.339	332.4	332.41	352.355	112.973	339.055
3706	ENSMUSG00000025217	Btrc	12234	beta-transducin repeat containing protein [Source:MGI Symbol;Acc:MGI:1338871]	167.471	-1.19841	0.39037	-3.06993	0.00214111	0.0115712	72.6784	168.667	63.2319	225.021	232.221	243.003	101.526	233.415
3724	ENSMUSG00000025241	Fyco1	17281	FYVE and coiled-coil domain containing 1 [Source:MGI Symbol;Acc:MGI:107277]	466.341	-1.69055	0.347328	-4.8673	1.13134e-06	2.02818e-05	167.42	348.101	145.821	668.748	754.137	713.822	220.447	712.236
3727	ENSMUSG00000025255	Zfhx4	80892	zinc finger homeodomain 4 [Source:MGI Symbol;Acc:MGI:2137668]	211.596	-1.94887	0.380057	-5.12783	2.93097e-07	6.1821e-06	81.7632	135.173	43.8752	337.927	320.76	350.077	86.9372	336.255
3731	ENSMUSG00000025262	Fam120c	207375	family with sequence similarity 120, member C [Source:MGI Symbol;Acc:MGI:2387687]	72.268	-1.14678	0.355302	-3.22762	0.00124827	0.00748037	31.1479	62.2036	41.2943	96.325	97.0825	105.555	44.8819	99.654
3738	ENSMUSG00000025271	Pfkfb1	18639	6-phosphofructo-2-kinase/fructose-2,6-biphosphatase 1 [Source:MGI Symbol;Acc:MGI:107816]	508.537	-1.41524	0.364132	-3.8866	0.000101658	0.000943535	184.292	448.584	198.729	847.186	692.78	679.65	277.201	739.872
3749	ENSMUSG00000025316	Banp	53325	BTG3 associated nuclear protein [Source:MGI Symbol;Acc:MGI:1889023]	40.2884	-1.97817	0.417639	-4.73655	2.17389e-06	3.58376e-05	15.5739	20.3358	12.9045	66.3221	58.2495	68.3447	16.2714	64.3054
3750	ENSMUSG00000025317	Car5a	12352	carbonic anhydrase 5a, mitochondrial [Source:MGI Symbol;Acc:MGI:101946]	259.476	-1.38526	0.30481	-4.54467	5.50209e-06	7.98015e-05	146.655	177.041	107.107	332.4	311.441	482.21	143.601	375.35
3752	ENSMUSG00000025323	Sp4	20688	trans-acting transcription factor 4 [Source:MGI Symbol;Acc:MGI:107595]	72.4984	-1.94911	0.431731	-4.51464	6.34253e-06	8.99963e-05	15.5739	49.0452	24.5185	127.907	102.519	115.427	29.7125	115.284
3755	ENSMUSG00000025330	Padi4	18602	peptidyl arginine deiminase, type IV [Source:MGI Symbol;Acc:MGI:1338898]	10.0743	-3.94521	1.39783	-2.82238	0.00476688	0.0215887	0	3.58867	0	36.3193	1.55332	18.9846	1.19622	18.9524
3785	ENSMUSG00000025402	Nab2	17937	Ngfi-A binding protein 2 [Source:MGI Symbol;Acc:MGI:107563]	40.8502	-1.75149	0.471458	-3.71505	0.000203164	0.0016467	18.1696	28.7094	9.03313	60.0057	72.2294	56.9539	18.6374	63.063
3795	ENSMUSG00000025422	Agap2	216439	ArfGAP with GTPase domain, ankyrin repeat and PH domain 2 [Source:MGI Symbol;Acc:MGI:3580016]	15.7157	-2.12766	0.747163	-2.84765	0.00440438	0.0202902	2.59566	7.17734	7.74268	35.5297	10.8732	30.3754	5.83856	25.5928
3798	ENSMUSG00000025429	Pstpip2	19201	proline-serine-threonine phosphatase-interacting protein 2 [Source:MGI Symbol;Acc:MGI:1335088]	167.219	-1.70224	0.280763	-6.0629	1.33688e-09	5.07686e-08	62.2957	93.3054	80.0077	288.185	220.571	258.95	78.5363	255.902
3799	ENSMUSG00000025436	Atp23	68876	ATP23 metallopeptidase and ATP synthase assembly factor homolog [Source:MGI Symbol;Acc:MGI:1916984]	22.9061	-1.89741	0.660427	-2.873	0.00406594	0.0190824	2.59566	7.17734	19.3567	26.8447	43.4929	37.9693	9.7099	36.1023
3804	ENSMUSG00000025453	Nnt	18115	nicotinamide nucleotide transhydrogenase [Source:MGI Symbol;Acc:MGI:109279]	13.5732	-3.31505	0.885736	-3.7427	0.000182053	0.00150865	1.29783	5.98112	0	18.9492	24.0765	31.1348	2.42631	24.7201
3816	ENSMUSG00000025486	Sirt3	64384	sirtuin 3 [Source:MGI Symbol;Acc:MGI:1927665]	495.539	-1.04559	0.336342	-3.1087	0.00187914	0.0104102	206.355	479.686	283.898	592.951	622.104	788.242	323.313	667.766
3821	ENSMUSG00000025495	Ptdss2	27388	phosphatidylserine synthase 2 [Source:MGI Symbol;Acc:MGI:1351664]	83.2836	-1.32899	0.35762	-3.71621	0.000202233	0.00164072	38.9348	68.1847	34.8421	128.697	123.489	105.555	47.3205	119.247
3828	ENSMUSG00000025505	Tmem80	71448	transmembrane protein 80 [Source:MGI Symbol;Acc:MGI:1918698]	31.7792	-2.4666	0.549726	-4.48696	7.22477e-06	0.000100915	10.3826	4.78489	14.1949	45.0043	73.7827	42.5256	9.78748	53.7708
3847	ENSMUSG00000025571	Tnrc6c	217351	trinucleotide repeat containing 6C [Source:MGI Symbol;Acc:MGI:2443265]	213.954	-1.40033	0.235885	-5.93649	2.91197e-09	1.0386e-07	106.422	117.23	129.045	332.4	283.481	315.145	117.565	310.342
3849	ENSMUSG00000025574	Tk1	21877	thymidine kinase 1 [Source:MGI Symbol;Acc:MGI:98763]	127.577	-1.32841	0.452844	-2.93348	0.00335189	0.0164387	44.1261	123.211	50.3274	225.811	205.038	116.945	72.5549	182.598
3869	ENSMUSG00000025626	Phf6	70998	PHD finger protein 6 [Source:MGI Symbol;Acc:MGI:1918248]	84.5496	-1.55525	0.442837	-3.51201	0.000444727	0.00318977	28.5522	75.3621	24.5185	125.538	122.712	130.614	42.8109	126.288
3871	ENSMUSG00000025645	Ccdc51	66658	coiled-coil domain containing 51 [Source:MGI Symbol;Acc:MGI:1913908]	52.1851	-1.84889	0.412282	-4.48454	7.30718e-06	0.000101732	28.5522	22.7282	16.7758	75.7967	64.4628	104.795	22.6854	81.6849
3896	ENSMUSG00000025764	Jade1	269424	jade family PHD finger 1 [Source:MGI Symbol;Acc:MGI:1925835]	537.556	-1.09079	0.285036	-3.82687	0.000129784	0.00115785	229.716	437.818	362.616	783.233	762.68	649.274	343.383	731.729
3914	ENSMUSG00000025813	Homer2	26557	homer scaffolding protein 2 [Source:MGI Symbol;Acc:MGI:1347354]	296.6	-1.13095	0.248202	-4.55656	5.19971e-06	7.59337e-05	182.994	206.947	167.758	371.088	491.626	359.189	185.9	407.301
3921	ENSMUSG00000025854	Fam20c	80752	family with sequence similarity 20, member C [Source:MGI Symbol;Acc:MGI:2136853]	278.281	-1.11569	0.29505	-3.78136	0.000155975	0.0013328	188.185	114.837	224.538	405.828	361.923	374.377	175.853	380.71
3925	ENSMUSG00000025860	Xiap	11798	X-linked inhibitor of apoptosis [Source:MGI Symbol;Acc:MGI:107572]	1587	-1.41287	0.266938	-5.29288	1.20408e-07	2.86103e-06	795.569	1167.51	636.191	2350.49	2319.88	2252.34	866.424	2307.57
3981	ENSMUSG00000025986	Slc39a10	227059	solute carrier family 39 (zinc transporter), member 10 [Source:MGI Symbol;Acc:MGI:1914515]	32.1316	-1.6446	0.562007	-2.9263	0.00343018	0.0167454	25.9566	14.3547	6.45224	31.582	58.2495	56.1945	15.5878	48.6753
3983	ENSMUSG00000025993	Slc40a1	53945	solute carrier family 40 (iron-regulated transporter), member 1 [Source:MGI Symbol;Acc:MGI:1315204]	2185.66	-2.80705	0.277537	-10.1142	4.78031e-24	1.4022e-21	495.77	704.575	438.752	4475.95	4082.12	2916.8	546.366	3824.96
3988	ENSMUSG00000026004	Kansl1l	68691	KAT8 regulatory NSL complex subunit 1-like [Source:MGI Symbol;Acc:MGI:1915941]	103.372	-1.93187	0.346537	-5.57478	2.4785e-08	7.08684e-07	36.3392	58.6149	33.5516	153.173	198.825	139.727	42.8353	163.908
3997	ENSMUSG00000026024	Als2	74018	alsin Rho guanine nucleotide exchange factor [Source:MGI Symbol;Acc:MGI:1921268]	584.061	-2.01443	0.303684	-6.63332	3.28214e-11	1.72343e-09	190.781	334.943	169.049	928.51	1028.3	852.79	231.591	936.532
4001	ENSMUSG00000026031	Cflar	12633	CASP8 and FADD-like apoptosis regulator [Source:MGI Symbol;Acc:MGI:1336166]	996.339	-1.35578	0.244837	-5.53748	3.06856e-08	8.5303e-07	698.231	515.572	465.851	1530.15	1548.66	1219.57	559.885	1432.79
4009	ENSMUSG00000026047	Kdelc1	72050	KDEL (Lys-Asp-Glu-Leu) containing 1 [Source:MGI Symbol;Acc:MGI:1919300]	53.889	-1.3635	0.353477	-3.85739	0.000114606	0.00104434	27.2544	33.4943	29.6803	69.4803	75.336	88.0887	30.143	77.635
4023	ENSMUSG00000026088	Mitd1	69028	MIT, microtubule interacting and transport, domain containing 1 [Source:MGI Symbol;Acc:MGI:1916278]	46.4661	-1.4267	0.366654	-3.89114	9.97755e-05	0.000930126	23.3609	25.1207	27.0994	70.2699	70.676	62.2696	25.1937	67.7385
4027	ENSMUSG00000026097	Ormdl1	227102	ORM1-like 1 (S. cerevisiae) [Source:MGI Symbol;Acc:MGI:2181669]	163.561	-1.19628	0.367396	-3.25609	0.00112957	0.00690276	68.7849	156.705	72.265	240.812	242.318	200.478	99.2517	227.869
4028	ENSMUSG00000026098	Pms1	227099	PMS1 homolog 1, mismatch repair system component [Source:MGI Symbol;Acc:MGI:1202302]	57.4423	-1.40819	0.508844	-2.76743	0.0056501	0.0248001	29.85	52.6338	11.614	79.7445	66.0161	104.795	31.366	83.5186
4031	ENSMUSG00000026104	Stat1	20846	signal transducer and activator of transcription 1 [Source:MGI Symbol;Acc:MGI:103063]	88.7633	-1.60246	0.332661	-4.81709	1.45668e-06	2.52111e-05	51.9131	50.2414	29.6803	126.328	149.119	125.299	43.9449	133.582
4032	ENSMUSG00000026107	Nabp1	109019	nucleic acid binding protein 1 [Source:MGI Symbol;Acc:MGI:1923258]	231.143	-1.08454	0.287011	-3.77876	0.000157611	0.00134139	171.313	118.426	154.854	397.933	266.394	277.935	148.198	314.087
4034	ENSMUSG00000026111	Unc50	67387	unc-50 homolog (C. elegans) [Source:MGI Symbol;Acc:MGI:1914637]	204.249	-1.40032	0.251902	-5.559	2.71329e-08	7.69352e-07	101.231	125.603	109.688	293.712	337.07	258.191	112.174	296.325
4071	ENSMUSG00000026199	Ankzf1	52231	ankyrin repeat and zinc finger domain containing 1 [Source:MGI Symbol;Acc:MGI:1098746]	140.064	-1.61986	0.307505	-5.26773	1.38123e-07	3.24092e-06	50.6153	71.7734	83.8791	180.017	204.262	249.838	68.7559	211.372
4083	ENSMUSG00000026227	2810459M11Rik	72792	RIKEN cDNA 2810459M11 gene [Source:MGI Symbol;Acc:MGI:1920042]	418.232	-2.06159	0.330787	-6.23238	4.59409e-10	1.92986e-08	118.102	247.618	118.721	660.853	727.73	636.365	161.481	674.983
4088	ENSMUSG00000026239	Pde6d	18582	phosphodiesterase 6D, cGMP-specific, rod, delta [Source:MGI Symbol;Acc:MGI:1270843]	24.419	-2.23036	0.798718	-2.79243	0.00523146	0.0233053	5.19131	20.3358	0	40.267	44.2696	36.4505	8.50904	40.329
4089	ENSMUSG00000026240	Cops7b	26895	COP9 signalosome subunit 7B [Source:MGI Symbol;Acc:MGI:1349388]	49.435	-1.75418	0.399192	-4.39432	1.11122e-05	0.000145649	19.4674	26.3169	21.9376	71.849	95.5291	61.5102	22.574	76.2961
4094	ENSMUSG00000026259	Ngef	53972	neuronal guanine nucleotide exchange factor [Source:MGI Symbol;Acc:MGI:1858414]	286.118	-1.36746	0.381609	-3.5834	0.00033915	0.00253847	102.528	265.562	110.978	449.253	382.117	406.271	159.689	412.547
4113	ENSMUSG00000026304	Rab17	19329	RAB17, member RAS oncogene family [Source:MGI Symbol;Acc:MGI:104640]	110.922	-1.04875	0.337324	-3.10904	0.00187695	0.0104015	89.5501	70.5772	56.7797	120.011	195.718	132.892	72.3023	149.541
4151	ENSMUSG00000026398	Nr5a2	26424	nuclear receptor subfamily 5, group A, member 2 [Source:MGI Symbol;Acc:MGI:1346834]	564.614	-2.02292	0.426988	-4.73764	2.16219e-06	3.56792e-05	180.398	388.773	99.3644	986.147	891.605	841.399	222.845	906.384
4163	ENSMUSG00000026430	Rassf5	54354	Ras association (RalGDS/AF-6) domain family member 5 [Source:MGI Symbol;Acc:MGI:1926375]	96.2361	-1.10259	0.37352	-2.95189	0.00315833	0.0157251	77.8697	69.3809	36.1325	157.12	101.742	135.171	61.1277	131.344
4171	ENSMUSG00000026447	Pik3c2b	240752	phosphatidylinositol-4-phosphate 3-kinase catalytic subunit type 2 beta [Source:MGI Symbol;Acc:MGI:2685045]	33.652	-2.11245	0.491187	-4.30071	1.70252e-05	0.000209587	9.0848	9.56979	19.3567	45.0043	53.5895	65.3071	12.6704	54.6336
4186	ENSMUSG00000026483	Fam129a	63913	family with sequence similarity 129, member A [Source:MGI Symbol;Acc:MGI:2137237]	47.9143	-1.18551	0.373621	-3.17304	0.00150853	0.00870871	29.85	35.8867	21.9376	61.5848	69.1227	69.1041	29.2248	66.6039
4239	ENSMUSG00000026611	Spata17	74717	spermatogenesis associated 17 [Source:MGI Symbol;Acc:MGI:1921967]	2.57584	-4.47405	1.75742	-2.5458	0.0109028	0.0418647	0	0	0	4.73729	3.8833	6.83447	0	5.15169
4242	ENSMUSG00000026616	Cr2	12902	complement receptor 2 [Source:MGI Symbol;Acc:MGI:88489]	5.84433	-3.67985	1.33478	-2.75689	0.00583542	0.0254429	0	0	2.58089	8.68504	11.6499	12.1502	0.860298	10.8284
4253	ENSMUSG00000026634	Angel2	52477	angel homolog 2 [Source:MGI Symbol;Acc:MGI:1196310]	264.025	-1.09932	0.237931	-4.62031	3.83163e-06	5.78416e-05	149.25	181.826	172.92	308.714	371.243	400.196	167.999	360.051
4254	ENSMUSG00000026637	Traf5	22033	TNF receptor-associated factor 5 [Source:MGI Symbol;Acc:MGI:107548]	26.1807	-1.42308	0.492086	-2.89194	0.00382873	0.0182154	9.0848	16.7471	16.7758	34.7402	34.173	45.5631	14.2026	38.1588
4255	ENSMUSG00000026638	Irf6	54139	interferon regulatory factor 6 [Source:MGI Symbol;Acc:MGI:1859211]	629.038	-1.31737	0.339461	-3.88076	0.00010413	0.000962804	224.524	553.851	301.965	881.926	856.656	955.307	360.113	897.963
4266	ENSMUSG00000026657	Frmd4a	209630	FERM domain containing 4A [Source:MGI Symbol;Acc:MGI:1919850]	93.0343	-1.65971	0.512652	-3.2375	0.00120584	0.00725165	40.2327	52.6338	41.2943	82.1131	77.666	264.266	44.7203	141.348
4272	ENSMUSG00000026669	Mcm10	70024	minichromosome maintenance 10 replication initiation factor [Source:MGI Symbol;Acc:MGI:1917274]	485.588	-2.19548	0.590174	-3.72006	0.000199173	0.00162053	67.4871	393.557	60.651	868.504	819.376	703.95	173.899	797.277
4284	ENSMUSG00000026698	Pigc	67292	phosphatidylinositol glycan anchor biosynthesis, class C [Source:MGI Symbol;Acc:MGI:1914542]	103.359	-1.4265	0.312253	-4.56842	4.91415e-06	7.22597e-05	42.8283	65.7923	59.3606	145.277	175.525	131.374	55.9937	150.725
4286	ENSMUSG00000026705	Klhl20	226541	kelch-like 20 [Source:MGI Symbol;Acc:MGI:2444855]	90.554	-1.99372	0.365177	-5.45961	4.77183e-08	1.2509e-06	31.1479	23.9245	54.1988	151.593	135.139	147.321	36.4237	144.684
4288	ENSMUSG00000026708	Cenpl	70454	centromere protein L [Source:MGI Symbol;Acc:MGI:1917704]	47.3379	-3.15505	0.515925	-6.11533	9.6357e-10	3.75991e-08	7.78697	16.7471	3.87134	71.849	102.519	81.2542	9.46848	85.2074
4297	ENSMUSG00000026730	Pter	19212	phosphotriesterase related [Source:MGI Symbol;Acc:MGI:107372]	558.059	-1.19266	0.371992	-3.20615	0.00134526	0.00794406	236.205	534.712	247.766	561.369	942.088	826.211	339.561	776.556
4301	ENSMUSG00000026743	Mllt10	17354	myeloid/lymphoid or mixed-lineage leukemia; translocated to, 10 [Source:MGI Symbol;Acc:MGI:1329038]	275.949	-1.18518	0.317905	-3.72808	0.000192943	0.00157663	123.294	245.226	136.787	416.882	338.624	394.88	168.436	383.462
4306	ENSMUSG00000026754	Golga1	76899	golgi autoantigen, golgin subfamily a, 1 [Source:MGI Symbol;Acc:MGI:1924149]	188.747	-2.21599	0.377035	-5.87741	4.16724e-09	1.44394e-07	33.7435	98.0903	68.3937	263.709	354.157	314.385	66.7425	310.751
4351	ENSMUSG00000026842	Abl1	11350	c-abl oncogene 1, non-receptor tyrosine kinase [Source:MGI Symbol;Acc:MGI:87859]	250.054	-1.29899	0.222089	-5.84896	4.94649e-09	1.69667e-07	150.548	142.351	140.659	386.09	353.38	327.295	144.519	355.588
4358	ENSMUSG00000026856	Dolpp1	57170	dolichyl pyrophosphate phosphatase 1 [Source:MGI Symbol;Acc:MGI:1914093]	67.8155	-1.33694	0.436515	-3.06276	0.00219309	0.0117849	24.6587	64.5961	25.8089	106.589	100.189	85.0511	38.3546	97.2765
4360	ENSMUSG00000026858	Miga2	108958	mitoguardin 2 [Source:MGI Symbol;Acc:MGI:1922035]	308.529	-1.48508	0.408416	-3.6362	0.00027669	0.00213775	105.124	282.309	99.3644	489.52	479.976	394.88	162.266	454.792
4368	ENSMUSG00000026873	Phf19	74016	PHD finger protein 19 [Source:MGI Symbol;Acc:MGI:1921266]	10.3235	-3.1667	0.946622	-3.34526	0.000822049	0.00531163	0	4.78489	1.29045	22.1074	15.5332	18.2252	2.02511	18.6219
4378	ENSMUSG00000026890	Lhx6	16874	LIM homeobox protein 6 [Source:MGI Symbol;Acc:MGI:1306803]	61.0505	-2.09073	0.559508	-3.73673	0.000186429	0.00153668	22.0631	37.0829	10.3236	44.2147	125.042	127.577	23.1565	98.9446
4385	ENSMUSG00000026918	Brd3	67382	bromodomain containing 3 [Source:MGI Symbol;Acc:MGI:1914632]	325.812	-1.62551	0.215684	-7.53654	4.82607e-14	3.83673e-12	171.313	163.883	143.24	502.153	511.819	462.466	159.479	492.146
4390	ENSMUSG00000026925	Inpp5e	64436	inositol polyphosphate-5-phosphatase E [Source:MGI Symbol;Acc:MGI:1927753]	39.0119	-1.92351	0.457272	-4.2065	2.59357e-05	0.00030078	12.9783	21.532	14.1949	48.952	55.9195	80.4948	16.2351	61.7888
4395	ENSMUSG00000026932	Nacc2	67991	nucleus accumbens associated 2, BEN and BTB (POZ) domain containing [Source:MGI Symbol;Acc:MGI:1915241]	178.307	-1.82359	0.324187	-5.6251	1.85399e-08	5.47603e-07	53.2109	113.641	68.3937	282.659	267.171	284.769	78.4153	278.2
4399	ENSMUSG00000026940	Ccdc183	77058	coiled-coil domain containing 183 [Source:MGI Symbol;Acc:MGI:1924308]	4.12701	-5.15385	1.63132	-3.15931	0.00158144	0.00905282	0	0	0	3.94775	13.9799	6.83447	0	8.25403
[truncated: 1,421 more rows]
