# Supplementary material for: 2-Chloroethanol Induces Hepatic Toxicity by Disrupting Endoplasmic Reticulum Homeostasis Ameliorated by Dimethyl Sulfoxide
Source: Research Square preprint supplement (doi:10.21203/rs.3.rs-5876858/v1), 2025-01-28
Supplement: Supplementary file 4 [file da43ab6960f77f144f1493ea.docx]

**Figure S1**

**
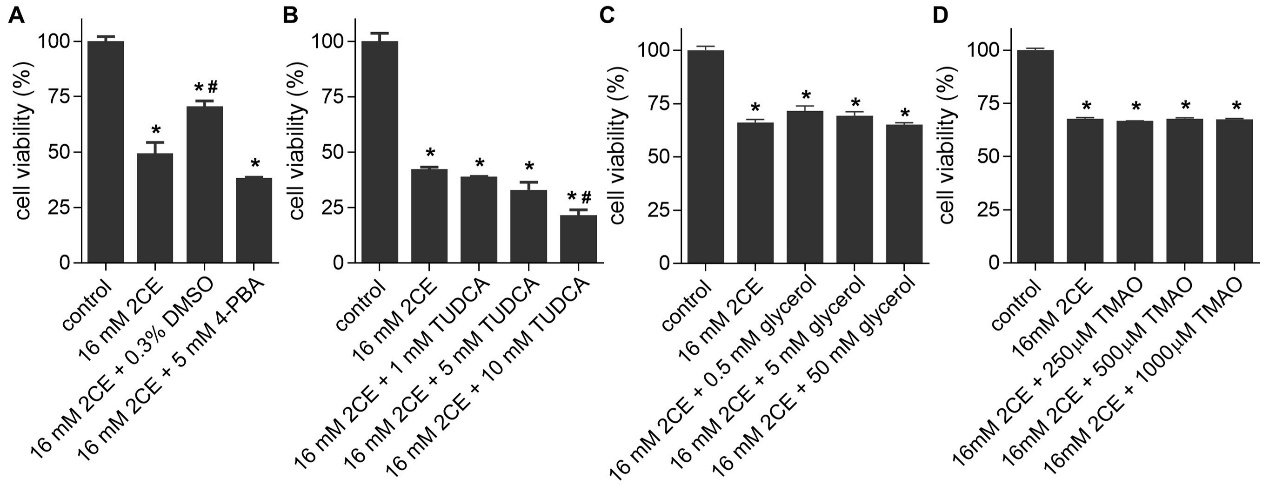
**

Effects of chemical chaperones on H4IIEC3 cell viability during 2CE intoxication. H4IIEC3 cells were co-treated with 16 mM 2CE and either 0.3% DMSO, 5 mM 4-PBA (**A**), 1–10 mM TUDCA (**B**), 0.5–50 mM glycerol (**C**), or 250–1000 μM TMAO (**D**). After a 24-hour incubation period, cell viability was assessed with untreated cells serving as the 100% baseline. **P* < 0.05 compared to control, #*P* < 0.05 compared to 2CE; mean ± SEM, n = 3.
