# Supplementary material for: 2-Chloroethanol Induces Hepatic Toxicity by Disrupting Endoplasmic Reticulum Homeostasis Ameliorated by Dimethyl Sulfoxide
Source: Research Square preprint supplement (doi:10.21203/rs.3.rs-5876858/v1), 2025-01-28
Supplement: Supplementary file 5 [file eb0674228e0da75e1322094e.xlsx]

## Sheet: Serum biochemical
Table S2. Mouse serum biochemical values after 24 hours exposure of 2CE.
Parameters	Control group	2CE group	p-value
AST (U/L)	54.68 ± 6.24	132 ± 11.16	<0.001
ALT (U/L)	26.74 ± 1.5	73.34 ± 12.93	0.007
Glucose (mg/dL)	208.4 ± 8.5	73.8 ± 27.81	0.002
Triglycerides (mg/dL)	124.4 ± 7.85	663.6 ± 108.2	0.001
Cholesterol (mg/dL)	124.5 ± 7.17	175.3 ± 9.26	0.003
HDL (mg/dL)	100.2 ± 6.94	98.84 ± 8.62	0.907
LDL (mg/dL)	22.86 ± 3.43	16.98 ± 3.55	0.268
AST: aspartate transaminase; ALT: alanine transaminase; HDL: high-density lipoprotein; LDL: low-density lipoprotein. Data are given as mean ± SEM; n=5.
